# Supplementary material for: Decoding the activated stem cell phenotype of the neonatally maturing pituitary
Source: eLife. 2022 Jun 14;11:e75742. doi: 10.7554/eLife.75742 (PMC9333987; doi:10.7554/eLife.75742)
Supplement: Figure 1—figure supplement 2—source data 1. — (A) DEG analysis in Prolif SC versus SC1+SC2 of neonatal AP. The columns represent: gene names (Gene), p values (p_val), average log fold change expression (avg_logFC; positive values indicate upregulation and negative values downregulation in Prolif SC), percentage of cells expressing the indicated gene in Prolif SC (pct.1) and in SC1+SC2 (pct.2), and the FDR adjusted p value (p_val_adj). (B) Gene Ontology (GO) analysis of genes upregulated in Prolif SC versus SC1+SC2 in neonatal AP. Analyses were performed using Reactome overrepresentation analysis. Pathway name, number of mapped identifiers that match the pathway (#Entities found), total number of identifiers in the pathway (#Entities total), total entities in the pathway/total number of entities for the entire species (Entities ratio), p value, FDR, and −log10(FDR) are shown in the columns. Associated with Figure 1—figure supplement 2A. [file elife-75742-fig1-figsupp2-data1.xlsx]

## Sheet: A
DEGs Prolif SC versus SC1+SC2 (neonatal AP)
Gene	p_val	avg_logFC	pct.1	pct.2	p_val_adj
Ccna2	2.86307e-295	1.06249	0.723	0.012	7.11588e-291
Top2a	1.06515e-291	2.05103	0.901	0.059	2.64733e-287
Nusap1	8.96586e-280	1.38327	0.688	0.011	2.22838e-275
Cdca8	1.03793e-279	1.31234	0.775	0.029	2.57968e-275
Birc5	6.48874e-277	1.25991	0.747	0.024	1.61271e-272
Pbk	8.17365e-272	0.90026	0.708	0.018	2.03148e-267
Aurkb	5.01185e-270	0.758279	0.632	0.006	1.24565e-265
Mki67	5.15904e-263	1.71484	0.826	0.052	1.28223e-258
Cdca3	7.95953e-259	1.14003	0.692	0.02	1.97826e-254
Pclaf	5.54942e-258	1.48991	0.802	0.045	1.37925e-253
Esco2	3.44613e-257	0.705079	0.565	0	8.56501e-253
Tpx2	9.16716e-255	1.23399	0.743	0.033	2.27841e-250
Kif4	9.62886e-248	0.589682	0.597	0.007	2.39316e-243
Cenpm	1.37135e-246	0.730399	0.802	0.049	3.40836e-242
Ckap2l	4.49747e-239	0.626441	0.569	0.006	1.1178e-234
Spc25	1.01064e-238	0.81401	0.7	0.03	2.51184e-234
Cdk1	2.75102e-238	1.35915	0.85	0.075	6.8374e-234
Kif11	3.65799e-237	0.861799	0.621	0.015	9.09158e-233
Knl1	1.4622e-234	0.862192	0.664	0.024	3.63415e-230
Spc24	4.20372e-234	1.17988	0.881	0.093	1.04479e-229
Mxd3	1.4181e-228	0.478468	0.545	0.005	3.52454e-224
Racgap1	1.56293e-228	0.945564	0.688	0.032	3.88451e-224
Melk	3.91345e-228	0.481908	0.577	0.01	9.72648e-224
Ncapg	1.98604e-226	0.487543	0.561	0.008	4.93611e-222
Nuf2	2.82364e-225	0.449429	0.522	0.003	7.01788e-221
Bub1	5.09977e-210	0.452936	0.498	0.004	1.2675e-205
Shcbp1	2.89596e-209	0.477088	0.585	0.017	7.19762e-205
Ect2	8.73554e-208	0.690703	0.613	0.024	2.17113e-203
Ckap2	1.36827e-207	0.734823	0.605	0.022	3.40069e-203
Incenp	1.86114e-207	0.761087	0.668	0.038	4.62567e-203
Anln	2.35241e-206	0.4854	0.514	0.007	5.84667e-202
Cenpk	1.76616e-204	0.596221	0.696	0.043	4.38962e-200
Tacc3	9.34974e-204	0.771892	0.719	0.051	2.32379e-199
Cenpf	3.09726e-203	1.94304	0.735	0.06	7.69794e-199
Prc1	3.79047e-201	1.57095	0.818	0.096	9.42082e-197
Ccnb2	1.15093e-200	1.10751	0.601	0.025	2.86053e-196
Neil3	1.36227e-200	0.452094	0.482	0.005	3.38579e-196
Cdca2	2.16592e-198	0.398064	0.486	0.006	5.38317e-194
Hmmr	5.97403e-197	0.578913	0.447	0.001	1.48479e-192
Cenpw	4.22459e-195	0.892618	0.87	0.119	1.04998e-190
Mis18bp1	8.11694e-195	0.599861	0.518	0.012	2.01739e-190
Ttk	5.42457e-189	0.329683	0.447	0.003	1.34822e-184
Kif15	1.30275e-187	0.502501	0.51	0.013	3.23785e-183
Ndc80	5.33777e-187	0.448817	0.506	0.012	1.32665e-182
Depdc1a	6.83308e-182	0.426168	0.415	0.001	1.69829e-177
Sgo1	3.47575e-180	0.434635	0.51	0.015	8.63862e-176
Tk1	1.29216e-178	0.53621	0.549	0.024	3.21154e-174
Ube2c	1.97127e-178	1.56079	0.53	0.022	4.89939e-174
Ncaph	4.18168e-178	0.432948	0.593	0.032	1.03931e-173
Uhrf1	3.63499e-177	0.59353	0.64	0.044	9.0344e-173
Knstrn	5.31167e-177	0.718266	0.557	0.027	1.32016e-172
Smc2	1.17331e-174	1.35075	0.945	0.222	2.91614e-170
Ccnb1	2.23818e-173	0.620261	0.419	0.004	5.56278e-169
Lockd	5.34027e-173	1.20252	0.755	0.09	1.32727e-168
Cenpp	1.74687e-171	0.436999	0.613	0.041	4.34166e-167
Mad2l1	2.05223e-170	0.658386	0.727	0.078	5.1006e-166
Rad51	1.97602e-168	0.47872	0.628	0.046	4.9112e-164
Kif20a	5.92413e-168	0.412963	0.423	0.006	1.47238e-163
Gmnn	1.55795e-167	0.784027	0.763	0.092	3.87212e-163
Bub1b	1.38085e-165	0.608963	0.545	0.029	3.43198e-161
Cenpn	7.04992e-163	0.352017	0.526	0.025	1.75219e-158
Dlgap5	2.44332e-160	0.462054	0.447	0.012	6.07262e-156
Ncapd2	8.94706e-159	0.577521	0.664	0.065	2.2237e-154
Ska1	3.75683e-158	0.278525	0.375	0.003	9.33723e-154
Cdc20	4.23691e-158	0.954553	0.514	0.027	1.05304e-153
Cenph	8.95889e-158	0.50759	0.609	0.049	2.22664e-153
Aspm	2.09541e-157	0.530941	0.451	0.014	5.20794e-153
Iqgap3	2.09959e-156	0.313077	0.368	0.002	5.21832e-152
Pimreg	4.39384e-156	0.3785	0.372	0.003	1.09205e-151
Mastl	2.29455e-153	0.304491	0.462	0.017	5.70286e-149
Fam111a	1.7755e-152	0.418512	0.542	0.033	4.41283e-148
E2f8	1.7973e-152	0.387312	0.443	0.014	4.467e-148
Kif23	9.84171e-152	1.1368	0.767	0.124	2.44606e-147
Kif20b	2.04476e-151	0.571877	0.569	0.043	5.08205e-147
Kif22	3.53403e-151	0.466502	0.526	0.032	8.78349e-147
Cep55	5.49614e-149	0.281545	0.372	0.005	1.36601e-144
Hist1h3c	6.56557e-148	0.52295	0.375	0.006	1.63181e-143
Kifc1	2.78117e-145	0.268623	0.375	0.006	6.91233e-141
Ncapg2	3.12849e-145	0.604109	0.66	0.075	7.77556e-141
Cdkn3	4.96364e-143	0.477043	0.379	0.008	1.23366e-138
Sgo2a	1.12523e-142	0.368601	0.375	0.007	2.79665e-138
Cks2	2.22278e-142	1.4102	0.806	0.159	5.52449e-138
Rrm2	2.24381e-140	0.459135	0.415	0.014	5.57677e-136
Cenpa	6.52858e-140	1.21021	0.514	0.038	1.62261e-135
Smc4	4.39765e-138	1.27781	0.905	0.269	1.09299e-133
Brca1	1.65955e-137	0.396787	0.462	0.025	4.12463e-133
Foxm1	2.12916e-136	0.328749	0.419	0.016	5.29182e-132
Cenpe	9.82924e-136	0.784992	0.506	0.037	2.44296e-131
Hist1h2ap	4.42987e-134	0.747871	0.383	0.012	1.101e-129
Stmn1	6.39906e-134	1.78496	1	0.857	1.59042e-129
Fbxo5	2.52217e-133	0.462224	0.478	0.03	6.2686e-129
Cdkn2c	5.68681e-133	0.556435	0.609	0.067	1.4134e-128
Rad51ap1	1.03254e-132	0.323113	0.423	0.019	2.56628e-128
Zwilch	1.20038e-132	0.296427	0.458	0.026	2.98342e-128
Brip1	2.49358e-132	0.322601	0.435	0.021	6.19753e-128
Nek2	8.9982e-131	0.284367	0.344	0.006	2.23641e-126
C330027C09Rik	2.92776e-129	0.376955	0.431	0.022	7.27665e-125
Arhgap11a	1.75388e-128	0.44421	0.53	0.045	4.3591e-124
H2afz	2.41509e-128	1.31771	1	0.978	6.00247e-124
Hmgb2	3.13241e-128	1.83428	1	0.881	7.78528e-124
Plk4	6.90792e-128	0.473145	0.609	0.069	1.71689e-123
Hells	6.11973e-125	0.890827	0.727	0.124	1.521e-120
Hist1h1b	8.29274e-124	1.74767	0.601	0.079	2.06108e-119
Rrm1	2.78166e-122	0.81695	0.818	0.192	6.91353e-118
Clspn	2.80229e-122	0.577697	0.538	0.056	6.96481e-118
Tcf19	6.08558e-121	0.410423	0.474	0.037	1.51251e-116
Plk1	2.80828e-120	0.289733	0.292	0.003	6.97971e-116
Trip13	1.12307e-119	0.345214	0.51	0.045	2.79127e-115
Mcm5	1.24641e-115	0.557578	0.711	0.121	3.09784e-111
Tyms	5.442e-115	0.873203	0.791	0.186	1.35255e-110
Tuba1b	5.45731e-115	1.36671	0.992	0.914	1.35636e-110
Dbf4	1.81667e-114	0.52794	0.585	0.075	4.51515e-110
Tubb5	3.46086e-111	1.74293	0.996	0.821	8.60163e-107
Cdc45	5.64961e-111	0.297439	0.431	0.031	1.40415e-106
Cit	2.87494e-108	0.490594	0.668	0.114	7.14537e-104
Spag5	7.25259e-107	0.304138	0.423	0.032	1.80256e-102
Rangap1	3.89882e-105	0.659145	0.783	0.188	9.69014e-101
Exo1	7.62188e-105	0.276236	0.368	0.021	1.89434e-100
Cenps	9.71414e-104	0.31734	0.447	0.04	2.41435e-99
Hmgb1	2.38386e-103	0.820644	1	0.994	5.92485e-99
H2afv	6.77458e-103	1.05159	1	0.94	1.68375e-98
Rad18	1.58611e-100	0.332276	0.514	0.062	3.94212e-96
Dnajc9	2.83985e-99	0.813739	0.897	0.334	7.05815e-95
Ccdc34	4.14477e-99	1.09304	0.957	0.505	1.03014e-94
Atad2	1.44939e-98	0.809454	0.771	0.197	3.6023e-94
Chaf1a	5.11781e-98	0.296532	0.466	0.049	1.27198e-93
Pkmyt1	3.73145e-97	0.285569	0.506	0.061	9.27416e-93
Ran	5.81915e-97	0.826677	0.992	0.88	1.44629e-92
H2afx	3.19414e-96	1.4585	0.862	0.371	7.93871e-92
Dek	3.63559e-96	0.944788	0.996	0.861	9.03589e-92
Hist1h2ab	4.42707e-96	0.256073	0.265	0.006	1.1003e-91
Pole	1.81086e-95	0.26574	0.427	0.04	4.50071e-91
Hist1h1a	4.75012e-94	0.401061	0.285	0.01	1.18059e-89
Slfn9	9.3772e-93	0.418444	0.455	0.052	2.33061e-88
Nucks1	3.42316e-92	0.948747	1	0.762	8.50792e-88
Diaph3	4.50911e-92	0.439502	0.601	0.105	1.1207e-87
Dscc1	1.56456e-91	0.273022	0.36	0.026	3.88857e-87
Zfp367	1.90938e-89	0.564417	0.644	0.135	4.74556e-85
Hist1h2ae	2.75064e-88	0.733246	0.403	0.043	6.83644e-84
Ube2t	2.27458e-87	0.301653	0.427	0.047	5.65324e-83
Tmpo	3.38729e-87	0.943911	0.957	0.576	8.41876e-83
Cks1b	1.28551e-86	0.834574	0.953	0.551	3.19502e-82
Topbp1	2.04627e-86	0.573532	0.763	0.213	5.0858e-82
Rfc5	2.4964e-86	0.400881	0.605	0.115	6.20454e-82
Dtl	7.3738e-86	0.514717	0.692	0.16	1.83268e-81
Chaf1b	7.39983e-86	0.439284	0.549	0.092	1.83915e-81
Mcm3	1.04563e-85	0.668139	0.688	0.164	2.5988e-81
Dhfr	2.62908e-85	0.549884	0.64	0.136	6.53431e-81
Rfc4	3.4578e-85	0.448661	0.617	0.122	8.59402e-81
Selenoh	3.56414e-85	0.812828	0.96	0.614	8.85832e-81
Ptma	6.91419e-85	0.496336	1	1	1.71845e-80
Rps14	6.08424e-84	-0.385241	1	0.998	1.51218e-79
Anp32b	6.38349e-84	0.703781	0.996	0.859	1.58655e-79
Prim1	2.04998e-82	0.420926	0.617	0.123	5.09503e-78
Tubb4b	6.11233e-82	1.45576	0.957	0.676	1.51916e-77
Slc43a3	1.17586e-80	0.291433	0.451	0.059	2.92249e-76
Nrm	2.32818e-80	0.305272	0.407	0.048	5.78646e-76
Prim2	2.83746e-80	0.308704	0.498	0.078	7.05223e-76
Rbl1	6.41087e-79	0.317084	0.522	0.086	1.59336e-74
Usp1	1.00532e-78	0.669866	0.874	0.358	2.49863e-74
Gins2	1.82771e-78	0.435052	0.636	0.137	4.54259e-74
Ube2s	1.15607e-77	0.874463	0.996	0.873	2.87329e-73
Rps27	5.22961e-77	-0.420192	1	0.998	1.29977e-72
Pola1	1.71135e-76	0.572888	0.711	0.199	4.25339e-72
Lsm2	3.85572e-76	0.557929	0.877	0.348	9.58302e-72
Lmnb1	2.87723e-75	0.847268	0.913	0.502	7.15107e-71
Haus4	3.80701e-74	0.365447	0.569	0.113	9.46195e-70
Dut	8.69326e-74	0.932849	0.909	0.483	2.16062e-69
Cenpq	8.83092e-74	0.361494	0.557	0.11	2.19484e-69
Fen1	9.7619e-74	0.263965	0.399	0.05	2.42622e-69
Hirip3	9.87005e-74	0.575494	0.739	0.231	2.4531e-69
Rbm3	3.47708e-73	0.585136	0.996	0.975	8.64192e-69
Lsm3	3.9737e-73	0.551458	0.929	0.412	9.87624e-69
Ppia	4.13357e-73	0.440916	1	0.998	1.02736e-68
Fam83d	4.03918e-72	0.278794	0.328	0.031	1.0039e-67
Hjurp	6.02944e-72	0.60674	0.771	0.278	1.49856e-67
E2f1	6.92338e-72	0.293442	0.383	0.048	1.72074e-67
Rnaseh2c	9.36737e-71	0.597199	0.909	0.429	2.32817e-66
Dnmt1	6.36941e-70	0.710601	0.775	0.29	1.58305e-65
Rpl37	5.21728e-69	-0.367205	1	0.999	1.2967e-64
Mcm7	8.68722e-69	0.577928	0.775	0.266	2.15912e-64
Brca2	1.03874e-68	0.389098	0.557	0.119	2.58169e-64
Chek1	1.10241e-68	0.26377	0.419	0.061	2.73992e-64
Chek2	1.49882e-68	0.289761	0.439	0.068	3.72518e-64
Cep192	3.26234e-68	0.262013	0.455	0.074	8.10821e-64
Hist1h4i	9.06178e-68	0.297214	0.431	0.067	2.25221e-63
Tipin	4.49263e-67	0.515917	0.735	0.24	1.1166e-62
Rpl17	5.41769e-67	-0.355412	1	0.999	1.34651e-62
Ddx39	1.81214e-66	0.408174	0.715	0.21	4.5039e-62
Cmc2	2.652e-66	0.410305	0.644	0.173	6.59128e-62
Snrpd1	5.04149e-66	0.619948	0.996	0.775	1.25301e-61
Pmf1	4.57886e-65	0.36898	0.68	0.187	1.13803e-60
Hist1h1e	9.36745e-65	0.938707	0.526	0.129	2.32819e-60
Hist1h1d	9.6675e-65	0.373565	0.356	0.045	2.40276e-60
Tubg1	1.01516e-64	0.265551	0.462	0.084	2.52307e-60
Ranbp1	1.73494e-63	0.716075	0.98	0.828	4.31203e-59
Ncapd3	5.10988e-63	0.407032	0.585	0.147	1.27001e-58
Nde1	7.9554e-63	0.508844	0.617	0.177	1.97724e-58
Sae1	1.24717e-62	0.528991	0.874	0.412	3.09972e-58
Dnph1	1.45889e-62	0.259503	0.427	0.072	3.62591e-58
Rps9	3.28048e-62	-0.313377	1	0.999	8.1533e-58
Rpl34	3.82956e-62	-0.328323	1	0.998	9.51799e-58
Psip1	1.12711e-61	0.605052	0.98	0.762	2.80133e-57
Hist2h2ac	1.58968e-61	0.26129	0.277	0.026	3.95098e-57
Dtymk	4.06314e-61	0.625935	0.909	0.511	1.00985e-56
Trim59	5.63767e-61	0.429124	0.518	0.117	1.40119e-56
Fxyd6	1.29758e-60	0.453706	0.711	0.222	3.225e-56
Lig1	2.47958e-60	0.898543	0.791	0.369	6.16275e-56
Rps18	2.49668e-60	-0.345613	1	0.998	6.20525e-56
Rps27a	2.79891e-60	-0.314664	1	0.999	6.95642e-56
Prdx4	1.13373e-59	0.614534	0.953	0.702	2.81778e-55
Eef1a1	1.17906e-59	-0.281493	1	1	2.93045e-55
Ezh2	1.23346e-59	0.605499	0.834	0.376	3.06565e-55
Rpl27a	1.68376e-58	-0.312764	1	0.999	4.18482e-54
Lsm6	2.87964e-58	0.540919	0.937	0.533	7.15706e-54
Anp32e	8.88394e-58	0.620549	0.937	0.571	2.20802e-53
Hmgn2	1.37989e-57	0.684531	0.992	0.85	3.42957e-53
Rpa2	2.15568e-57	0.324945	0.486	0.106	5.35773e-53
Itgb3bp	2.31087e-57	0.414583	0.731	0.243	5.74343e-53
Jpt2	2.78161e-57	0.292615	0.632	0.169	6.91342e-53
Cdt1	6.08442e-57	0.288713	0.407	0.073	1.51222e-52
Mcm4	7.21687e-57	0.510004	0.636	0.197	1.79368e-52
Pold2	1.425e-56	0.294882	0.506	0.114	3.5417e-52
Mcm6	4.83741e-56	0.692768	0.735	0.301	1.20229e-51
Rpl26	8.95575e-56	-0.313794	1	0.999	2.22586e-51
Lbr	9.09507e-56	0.369447	0.672	0.208	2.26049e-51
H1fx	1.9477e-55	0.783326	0.874	0.484	4.84082e-51
Rad21	4.68705e-55	0.727514	0.889	0.546	1.16492e-50
Rpl18a	1.03253e-54	-0.341402	1	1	2.56624e-50
Gas2l3	2.45575e-54	0.308742	0.379	0.066	6.10352e-50
Mcm2	4.11967e-54	0.333423	0.534	0.133	1.0239e-49
Pcna	4.6325e-53	0.685145	0.739	0.315	1.15136e-48
Fau	5.45284e-53	-0.303176	1	0.999	1.35525e-48
Smc1a	1.43643e-52	0.570569	0.953	0.656	3.5701e-48
Rpl38	1.65018e-52	-0.32237	1	0.998	4.10137e-48
Rps28	6.37073e-52	-0.324817	1	0.999	1.58338e-47
Rpl30	3.64573e-51	-0.287539	1	0.998	9.06109e-47
Lsm5	5.38364e-51	0.512936	0.972	0.665	1.33805e-46
Ptn	1.0419e-50	0.678108	0.941	0.607	2.58953e-46
Ywhah	1.16662e-50	0.526821	0.949	0.731	2.89952e-46
Rpl9	1.84638e-50	-0.283178	1	0.999	4.589e-46
Hsp90aa1	4.07306e-50	0.456047	1	0.979	1.01232e-45
Rps7	7.10081e-50	-0.302013	1	0.998	1.76483e-45
2010-09-01	7.52749e-50	0.368431	0.64	0.208	1.87088e-45
Hint1	1.42411e-49	0.460208	1	0.922	3.53947e-45
Fkbp2	1.93667e-49	0.525404	0.929	0.594	4.8134e-45
Rps10	2.69201e-49	-0.283507	1	0.999	6.69072e-45
Rpl7	4.09546e-49	-0.313336	1	0.999	1.01789e-44
Nasp	4.49944e-49	0.586724	0.984	0.786	1.11829e-44
Banf1	5.63978e-49	0.508708	0.968	0.722	1.40171e-44
Aldoc	1.44421e-48	-0.72894	0.739	0.927	3.58945e-44
Rps21	4.00544e-48	-0.273407	1	1	9.95513e-44
Ppih	4.46974e-48	0.329197	0.672	0.216	1.11091e-43
Ckap5	3.97409e-47	0.563599	0.688	0.29	9.8772e-43
Clic1	4.40868e-47	0.566181	1	0.861	1.09573e-42
Uchl5	1.19278e-46	0.308979	0.704	0.236	2.96453e-42
Rfc2	2.19916e-46	0.435444	0.755	0.315	5.46579e-42
Psat1	5.19202e-46	0.302985	0.636	0.209	1.29042e-41
Alyref	1.83115e-45	0.482369	0.897	0.563	4.55115e-41
Ybx1	2.72039e-45	0.394305	1	0.979	6.76125e-41
Nsmce4a	4.02979e-45	0.492107	0.937	0.609	1.00156e-40
Aldoa	4.09366e-45	-0.633057	0.715	0.918	1.01744e-40
Rps23	4.4351e-45	-0.268255	1	0.999	1.1023e-40
Rpl35a	4.73578e-45	-0.250807	1	0.998	1.17703e-40
Cbx3	7.35456e-45	0.450584	0.984	0.895	1.8279e-40
Cdca7l	7.55507e-45	0.268744	0.51	0.139	1.87774e-40
Nap1l1	8.02321e-45	0.553496	0.984	0.893	1.99409e-40
Rack1	8.76974e-45	-0.307952	1	0.998	2.17963e-40
Rpa3	1.44285e-44	0.38708	0.735	0.292	3.58605e-40
Rpl5	2.1956e-44	-0.299361	0.996	0.997	5.45694e-40
Cdk5rap2	2.42243e-44	0.346586	0.636	0.223	6.0207e-40
Rpl23	3.67131e-44	-0.255586	1	1	9.12467e-40
Rpl6	4.93029e-44	-0.273331	1	0.999	1.22538e-39
Rfc3	1.32203e-43	0.44122	0.715	0.291	3.28577e-39
Smc6	4.91823e-43	0.507723	0.854	0.485	1.22238e-38
Baz1b	7.08165e-43	0.476148	0.846	0.427	1.76007e-38
Gltp	8.16503e-43	0.413545	0.818	0.396	2.02934e-38
Mns1	2.82594e-42	0.350347	0.581	0.194	7.0236e-38
Hnrnpab	2.99536e-42	0.410763	0.996	0.935	7.44466e-38
Cox7a2	3.97669e-42	0.347215	0.996	0.97	9.88366e-38
Rpl36	1.74664e-41	-0.271827	1	0.998	4.34109e-37
Ssrp1	1.76958e-41	0.472482	0.933	0.621	4.39812e-37
Sumo2	3.35074e-41	0.35166	1	0.986	8.32793e-37
Vrk1	5.79084e-41	0.273425	0.632	0.212	1.43926e-36
Pih1d1	7.64906e-41	0.327812	0.652	0.239	1.9011e-36
Hat1	1.55414e-40	0.458109	0.751	0.364	3.86266e-36
Rpl28	1.77386e-40	-0.278057	1	0.999	4.40875e-36
Dctpp1	2.52109e-40	0.509208	0.759	0.362	6.26591e-36
Fabp5	2.65101e-40	0.347528	0.692	0.264	6.58882e-36
Rpl10	2.79398e-40	-0.303338	0.996	0.997	6.94416e-36
Nudc	1.32303e-39	0.419157	0.968	0.805	3.28825e-35
Hspa14	1.62975e-39	0.309042	0.711	0.282	4.05058e-35
Rpl22	1.84947e-39	-0.301533	1	0.997	4.59667e-35
Bub3	1.8642e-39	0.539617	0.842	0.527	4.63329e-35
Eif3f	8.66519e-39	-0.378471	0.988	0.987	2.15365e-34
Hpf1	1.9817e-38	0.420949	0.834	0.459	4.92531e-34
Ssna1	2.59529e-38	0.325497	0.759	0.331	6.45032e-34
Kdm5b	2.89487e-38	-0.570496	0.628	0.81	7.19491e-34
Hist1h4d	3.65131e-38	0.969299	0.557	0.226	9.07497e-34
Tagln2	5.75803e-38	0.519661	0.968	0.747	1.4311e-33
Orc6	6.2785e-38	0.358538	0.672	0.272	1.56046e-33
Syce2	6.33217e-38	0.31502	0.549	0.184	1.5738e-33
Mrpl18	1.00511e-37	0.373498	0.779	0.368	2.4981e-33
Vars	1.0701e-37	0.304775	0.648	0.251	2.65963e-33
Cox7a2l	2.58442e-37	-0.373419	0.988	0.988	6.42332e-33
Lsm4	4.87846e-37	0.380494	0.964	0.745	1.21249e-32
Anapc11	6.57872e-37	0.402498	0.949	0.656	1.63508e-32
Mlf1	9.78726e-37	0.369167	0.64	0.248	2.43253e-32
Cdca7	1.07177e-36	0.305967	0.427	0.121	2.66379e-32
Ncaph2	1.54888e-36	0.265417	0.696	0.277	3.84959e-32
Pycard	2.94086e-36	0.260462	0.585	0.204	7.30921e-32
Snrpa1	3.16861e-36	0.361322	0.838	0.443	7.87526e-32
Rps26	6.69089e-36	-0.263432	1	0.999	1.66295e-31
Tmem107	8.07319e-36	0.297945	0.593	0.225	2.00651e-31
Cntln	9.11735e-36	0.413018	0.802	0.433	2.26603e-31
Calm2	1.14998e-35	0.486828	1	0.974	2.85816e-31
Nelfe	1.58704e-35	0.328409	0.66	0.286	3.94443e-31
Nsmce1	2.07713e-35	0.381817	0.862	0.504	5.16249e-31
Pole3	3.8708e-35	0.33814	0.787	0.35	9.62048e-31
Smc3	7.11031e-35	0.384179	0.972	0.742	1.7672e-30
Txn1	2.14481e-34	0.329242	1	0.987	5.33071e-30
Tfdp1	2.60241e-34	0.317657	0.711	0.301	6.46803e-30
Nsd2	4.73193e-34	0.395726	0.83	0.483	1.17607e-29
Itm2b	6.09259e-34	-0.328584	1	0.998	1.51425e-29
Vegfb	1.6624e-33	0.321093	0.87	0.452	4.13172e-29
Jpt1	3.96761e-33	0.689549	0.933	0.787	9.8611e-29
Hnrnpd	5.12766e-33	0.375489	0.98	0.875	1.27443e-28
Rnf168	1.15391e-32	0.252202	0.53	0.187	2.86794e-28
Fam81a	2.25558e-32	0.253671	0.506	0.172	5.60602e-28
Pcnt	4.38391e-32	0.280716	0.601	0.233	1.08958e-27
Suz12	6.10205e-32	0.377355	0.81	0.454	1.5166e-27
Cox6b2	6.82765e-32	0.395394	0.656	0.285	1.69694e-27
Hnrnpa3	2.13356e-31	0.383145	0.992	0.952	5.30274e-27
Stub1	4.22083e-31	0.357974	0.96	0.723	1.04905e-26
Kif18a	5.4333e-31	0.27742	0.538	0.198	1.35039e-26
Rpl12	6.89358e-31	-0.251563	1	1	1.71333e-26
Rbbp7	7.30539e-31	0.3516	0.984	0.852	1.81568e-26
Gapdh	9.75934e-31	0.293894	0.996	0.989	2.42559e-26
1810037I17Rik	1.09953e-30	0.424388	0.972	0.818	2.73276e-26
Cse1l	1.41525e-30	0.256133	0.644	0.272	3.51747e-26
Hnrnpf	1.99943e-30	0.307418	0.996	0.971	4.9694e-26
Cacybp	2.23877e-30	0.354396	0.937	0.731	5.56424e-26
Maz	2.43412e-30	0.308109	0.802	0.415	6.04975e-26
Snrpb	2.60532e-30	0.301831	0.984	0.951	6.47525e-26
Cbx5	4.7056e-30	0.364529	0.98	0.802	1.16953e-25
Ctsl	4.72345e-30	-0.411413	0.87	0.932	1.17397e-25
Lsm8	5.08626e-30	0.331952	0.826	0.47	1.26414e-25
Snrpf	5.39328e-30	0.325392	0.992	0.95	1.34045e-25
Uqcrh	5.49893e-30	-0.301192	0.996	0.993	1.3667e-25
Hmgn1	5.66052e-30	0.280137	1	0.992	1.40687e-25
Xpo1	5.77385e-30	0.273264	0.704	0.319	1.43503e-25
Hmgn5	7.26994e-30	0.430638	0.917	0.686	1.80687e-25
Dpy30	1.42614e-29	0.359518	0.925	0.635	3.54452e-25
Cenpx	1.65541e-29	0.333359	0.822	0.446	4.11435e-25
Oxct1	1.6689e-29	0.356272	0.806	0.445	4.14789e-25
Snrpe	1.70777e-29	0.306437	0.996	0.954	4.24448e-25
Arl6ip1	3.18563e-29	1.10824	0.957	0.829	7.91757e-25
Fuom	3.59616e-29	0.315398	0.739	0.373	8.93788e-25
Rnaseh2b	4.33876e-29	0.293308	0.561	0.227	1.07835e-24
Casp8ap2	5.48736e-29	0.263858	0.581	0.234	1.36383e-24
Wee1	6.32507e-29	0.267593	0.609	0.254	1.57203e-24
Pa2g4	9.98772e-29	0.341396	0.866	0.542	2.48235e-24
Map1lc3b	1.37086e-28	-0.371166	0.96	0.952	3.40713e-24
Tuba1a	2.47461e-28	0.484849	0.996	0.913	6.1504e-24
Cep57	2.77697e-28	0.292774	0.696	0.341	6.90188e-24
Mia	2.83031e-28	-0.451052	0.968	0.991	7.03445e-24
Trim28	4.32472e-28	0.349929	0.881	0.564	1.07487e-23
Pfn1	4.7429e-28	0.291765	1	0.961	1.1788e-23
Ddx39b	1.06703e-27	0.389975	0.96	0.755	2.652e-23
G2e3	2.44089e-27	0.326047	0.51	0.206	6.06659e-23
Tubb6	3.46019e-27	0.286342	0.593	0.241	8.59995e-23
Hdgf	4.56395e-27	0.366294	0.98	0.881	1.13433e-22
Eef2	6.56189e-27	-0.275079	1	0.991	1.63089e-22
Clic4	1.16145e-26	0.283499	0.743	0.368	2.88666e-22
Exosc8	1.99661e-26	0.27495	0.696	0.334	4.96238e-22
Supt16	2.07692e-26	0.347419	0.933	0.652	5.16199e-22
Cycs	2.77956e-26	0.358607	0.96	0.731	6.90832e-22
Cdk4	4.41962e-26	0.341905	0.972	0.885	1.09845e-21
Hnrnpa2b1	5.54992e-26	0.315271	1	0.986	1.37938e-21
Kpnb1	6.04873e-26	0.285299	0.81	0.458	1.50335e-21
Siva1	1.52596e-25	0.521059	0.866	0.65	3.79261e-21
Acat1	1.59963e-25	0.314503	0.846	0.552	3.97572e-21
Arpp19	1.66123e-25	0.329576	0.976	0.809	4.12882e-21
Hist1h1c	1.74155e-25	0.253443	0.49	0.188	4.32845e-21
Pbdc1	2.17492e-25	0.258329	0.755	0.394	5.40556e-21
Prkar2a	2.3247e-25	0.267241	0.636	0.293	5.77781e-21
Atp5o.1	3.01475e-25	0.313288	0.988	0.923	7.49286e-21
Plp2	1.22357e-24	0.267276	0.794	0.425	3.04107e-20
H2afy	1.41292e-24	0.315274	0.976	0.859	3.51167e-20
Actl6a	1.63849e-24	0.280128	0.85	0.524	4.07231e-20
Srsf3	2.2538e-24	0.318393	0.996	0.96	5.60158e-20
Ptges3	3.41583e-24	0.29762	0.98	0.851	8.48971e-20
Pbxip1	3.62265e-24	-0.445491	0.684	0.815	9.00373e-20
Rad50	4.93221e-24	0.274549	0.652	0.308	1.22585e-19
Nfic	5.4306e-24	0.345707	0.806	0.478	1.34972e-19
Triobp	7.22686e-24	0.276813	0.628	0.306	1.79616e-19
Fbln1	8.3841e-24	0.308954	0.775	0.423	2.08378e-19
Calm1	9.21658e-24	0.298162	1	0.988	2.29069e-19
Srsf2	1.00888e-23	0.310433	0.976	0.896	2.50747e-19
Nop56	1.03575e-23	0.301785	0.751	0.416	2.57426e-19
Ctcf	1.1673e-23	0.337354	0.862	0.645	2.9012e-19
Pkp4	1.64561e-23	0.275539	0.715	0.373	4.09e-19
Hnrnpu	2.28004e-23	0.327108	1	0.938	5.66682e-19
Set	3.16965e-23	0.286212	0.996	0.952	7.87785e-19
Vdac3	3.29457e-23	0.29983	0.968	0.779	8.18833e-19
Tuba1c	7.13419e-23	0.579355	0.818	0.61	1.77313e-18
Hsp90b1	9.01512e-23	0.407291	0.996	0.951	2.24062e-18
Lgals1	9.39528e-23	0.548123	0.664	0.342	2.3351e-18
Calm3	1.82014e-22	0.381063	0.874	0.624	4.52377e-18
Pnrc1	2.33552e-22	-0.329506	0.968	0.978	5.8047e-18
Ppp1cc	2.39594e-22	0.28306	0.929	0.692	5.95487e-18
Lyar	2.97279e-22	0.262922	0.763	0.409	7.38857e-18
Ddah2	3.14985e-22	0.393641	0.949	0.796	7.82865e-18
Rbbp4	3.22406e-22	0.332099	0.941	0.73	8.01308e-18
Hnrnpul1	4.56999e-22	0.268134	0.83	0.515	1.13583e-17
Uba2	5.81312e-22	0.27834	0.834	0.513	1.44479e-17
Anapc5	6.58039e-22	0.289533	0.949	0.768	1.63549e-17
Naa50	8.42777e-22	0.271206	0.83	0.503	2.09464e-17
Ssb	8.8208e-22	0.276263	0.972	0.881	2.19232e-17
Sf3b5	1.7755e-21	0.286724	0.945	0.697	4.41282e-17
Nudt21	2.48554e-21	0.284589	0.933	0.736	6.17757e-17
Pfdn5	3.39325e-21	-0.261872	0.996	0.991	8.43359e-17
Kmt5a	9.64041e-21	0.25756	0.723	0.41	2.39603e-16
Mrpl51	1.92623e-20	0.277714	0.822	0.497	4.78746e-16
Raly	2.59185e-20	0.256715	0.972	0.848	6.44178e-16
Nop58	5.47804e-20	0.258246	0.941	0.696	1.36151e-15
Tpr	9.30699e-20	0.2684	0.964	0.824	2.31316e-15
Srpk1	9.31994e-20	0.259791	0.822	0.531	2.31638e-15
Rif1	1.09585e-19	0.308069	0.775	0.487	2.72363e-15
Stag1	1.24833e-19	0.297841	0.87	0.564	3.10259e-15
Srsf7	1.39029e-19	0.309089	0.893	0.652	3.45544e-15
Rps27rt	1.56646e-19	-0.300161	0.949	0.941	3.89327e-15
Idh2	4.35619e-19	0.29613	0.949	0.762	1.08269e-14
Ppm1g	5.65052e-19	0.269152	0.842	0.544	1.40438e-14
Ilf2	7.7657e-19	0.260093	0.913	0.647	1.93009e-14
Cdkn1a	8.68934e-19	0.259576	0.538	0.259	2.15965e-14
Ndufa5	1.03264e-18	0.280671	0.921	0.749	2.56652e-14
Malat1	1.73751e-18	-0.33508	0.996	0.997	4.31841e-14
Myef2	1.88034e-18	0.284019	0.723	0.443	4.6734e-14
Smarcc1	2.06857e-18	0.275277	0.893	0.651	5.14121e-14
Elof1	3.96428e-18	0.251836	0.909	0.656	9.85282e-14
Fmc1	6.06078e-18	0.269198	0.889	0.569	1.50635e-13
G3bp1	1.00393e-17	0.250263	0.968	0.771	2.49517e-13
Rfc1	1.1638e-17	0.298779	0.866	0.654	2.89251e-13
Cdk2ap1	1.86051e-17	0.267367	0.897	0.652	4.62411e-13
Fkbp3	8.96313e-17	0.259325	0.98	0.865	2.2277e-12
Phip	9.5039e-17	0.268461	0.885	0.628	2.3621e-12
Gm47283	1.00795e-16	0.389335	0.759	0.505	2.50515e-12
Gabarap	2.55943e-16	-0.254247	0.98	0.971	6.3612e-12
Igfbp2	3.88745e-16	0.2822	0.984	0.853	9.66187e-12
Prdx6	4.41422e-16	-0.365707	0.806	0.827	1.09711e-11
Hp1bp3	6.83143e-16	0.313006	0.929	0.753	1.69788e-11
Zfp91	8.44782e-16	0.253941	0.909	0.726	2.09962e-11
Smarca5	9.26195e-16	0.270493	0.972	0.854	2.30196e-11
Myh10	9.57409e-16	0.286776	0.905	0.677	2.37954e-11
Mxd4	1.30007e-15	-0.340784	0.502	0.649	3.2312e-11
Tmem176b	2.12128e-15	-0.349782	0.972	0.971	5.27223e-11
Slbp	4.01234e-15	0.335148	0.842	0.643	9.97226e-11
Slc25a5	6.51596e-15	0.275254	0.957	0.851	1.61948e-10
Hmgb3	1.777e-14	0.299958	0.913	0.733	4.41656e-10
Grin2a	2.74005e-14	-0.339766	0.573	0.684	6.81011e-10
Bex2	1.05273e-13	0.270954	0.933	0.76	2.61647e-09
Eif3e	1.61214e-13	-0.252305	0.941	0.936	4.0068e-09
Hmgcs2	4.91775e-13	-0.369798	0.755	0.791	1.22226e-08
Tshz2	5.2128e-13	-0.320587	0.47	0.617	1.29559e-08
Marcks	8.26187e-13	0.306962	0.992	0.918	2.05341e-08
Fbxo32	8.8557e-13	-0.376282	0.304	0.484	2.20099e-08
Cd24a	1.15435e-12	-0.253833	0.957	0.975	2.86902e-08
Calcoco1	1.35633e-12	-0.27468	0.344	0.498	3.37103e-08
Ptms	1.54216e-12	0.371317	1	0.988	3.83289e-08
Gh	2.40134e-12	0.557478	0.079	0.31	5.96829e-08
Acot1	3.2553e-12	-0.328383	0.881	0.865	8.09073e-08
Ogt	4.2757e-12	-0.303806	0.747	0.74	1.06268e-07
AY036118	4.6448e-12	-0.337576	0.901	0.903	1.15442e-07
Slc16a2	9.9525e-12	-0.261865	0.901	0.902	2.47359e-07
AC160336.1	1.17948e-11	0.333158	0.842	0.625	2.93149e-07
Ypel3	7.93431e-11	-0.274755	0.636	0.703	1.97199e-06
Meg3	8.58722e-11	-0.254327	0.98	0.984	2.13427e-06
Kcnk1	1.05804e-10	-0.277575	0.968	0.979	2.62965e-06
6330403K07Rik	1.67931e-10	-0.281052	0.684	0.693	4.17375e-06
Plat	5.01112e-10	-0.272002	0.945	0.914	1.24546e-05
Paics	5.34056e-10	0.25056	0.881	0.724	1.32734e-05
Klk8	5.34244e-10	-0.25058	0.419	0.545	1.32781e-05
Stat3	8.39848e-10	-0.28339	0.731	0.777	2.08736e-05
Tsc22d1	1.1499e-09	-0.280019	0.992	0.986	2.85797e-05
Ube2h	1.57894e-09	-0.2718	0.656	0.692	3.92431e-05
Dlgap4	2.36392e-09	-0.252425	0.474	0.557	5.87529e-05
Sox4	2.50987e-09	-0.288509	0.98	0.943	6.23802e-05
Maff	4.55047e-09	-0.420165	0.711	0.731	0.000113097
Gpx1	5.15694e-09	-0.275752	0.775	0.777	0.00012817
Nrep	9.35498e-09	-0.269079	0.569	0.62	0.000232509
Rbp1	9.62348e-09	-0.350327	0.858	0.83	0.000239182
Cstb	3.37353e-08	-0.287526	0.846	0.833	0.000838457
Ifitm3	3.80499e-08	-0.294898	1	0.987	0.000945693
Thsd7a	4.77881e-08	-0.264024	0.747	0.758	0.00118772
Glul	5.92463e-08	-0.280691	0.862	0.835	0.00147251
Ndrg2	6.39832e-08	-0.254335	0.739	0.733	0.00159024
Mageh1	2.22478e-07	-0.347975	0.866	0.844	0.00552946
Calml4	2.82902e-07	-0.260429	0.221	0.359	0.00703125
Ccnd2	3.82728e-07	-0.411657	0.644	0.702	0.00951233
Tcim	6.05975e-07	-0.284714	0.688	0.746	0.0150609
Socs2	1.1653e-06	-0.276751	0.81	0.766	0.0289623
Mettl7a1	1.21954e-06	-0.281531	0.458	0.515	0.0303104
Nrip1	1.6116e-06	-0.261432	0.822	0.814	0.0400548
Ramp1	3.37718e-06	-0.283191	0.36	0.441	0.0839365
Klf9	1.45484e-05	-0.257737	0.68	0.675	0.361587
Cpe	0.000104302	-0.257626	0.644	0.645	1
Txnip	0.000123205	-0.347237	0.668	0.669	1
Rgs2	0.000143324	-0.321496	0.889	0.859	1
Klf5	0.000144127	-0.260753	0.818	0.785	1
Arc	0.000527384	-0.289584	0.814	0.792	1
Nr4a2	0.00119513	-0.271601	0.858	0.803	1
Homer1	0.00336854	-0.283453	0.664	0.625	1
Acta2	0.032056	-0.25219	0.549	0.431	1
Cidea	0.0481582	-0.301347	0.3	0.312	1
Mt1	0.0540716	-0.256671	0.98	0.965	1
Hbb-bs	0.0770154	0.957639	0.257	0.188	1
Tagln	0.261333	-0.253281	0.534	0.531	1
Edn2	0.464045	-0.276021	0.656	0.571	1

## Sheet: B
GO analysis of genes upregulated in Prolif SC versus SC1+SC2 (neonatal AP)
Pathway name	#Entities found	#Entities total	Entities ratio	Entities pValue	Entities FDR	-log10(FDR)
G1/S-Specific Transcription	24	43	0.0030131	1.11022e-16	2.22045e-15	14.6536
Activation of the pre-replicative complex	19	36	0.0025226	1.11022e-16	2.22045e-15	14.6536
Peptide chain elongation	41	97	0.006797	1.11022e-16	2.22045e-15	14.6536
Nucleosome assembly	22	54	0.0037839	1.11022e-16	2.22045e-15	14.6536
Deposition of new CENPA-containing nucleosomes at the centromere	22	54	0.0037839	1.11022e-16	2.22045e-15	14.6536
Amplification of signal from unattached kinetochores via a MAD2 inhibitory signal	38	94	0.00658678	1.11022e-16	2.22045e-15	14.6536
Amplification of signal from the kinetochores	38	94	0.00658678	1.11022e-16	2.22045e-15	14.6536
Nonsense Mediated Decay (NMD) independent of the Exon Junction Complex (EJC)	39	101	0.00707729	1.11022e-16	2.22045e-15	14.6536
Resolution of Sister Chromatid Cohesion	51	134	0.00938967	1.11022e-16	2.22045e-15	14.6536
Formation of a pool of free 40S subunits	40	106	0.00742765	1.11022e-16	2.22045e-15	14.6536
Mitotic Spindle Checkpoint	41	111	0.00777801	1.11022e-16	2.22045e-15	14.6536
Viral mRNA Translation	39	114	0.00798823	1.11022e-16	2.22045e-15	14.6536
SRP-dependent cotranslational protein targeting to membrane	40	119	0.00833859	1.11022e-16	2.22045e-15	14.6536
GTP hydrolysis and joining of the 60S ribosomal subunit	40	120	0.00840866	1.11022e-16	2.22045e-15	14.6536
DNA strand elongation	21	38	0.00266274	1.11022e-16	2.22045e-15	14.6536
Mitotic Prometaphase	68	211	0.0147852	1.11022e-16	2.22045e-15	14.6536
Eukaryotic Translation Elongation	41	102	0.00714736	1.11022e-16	2.22045e-15	14.6536
Mitotic G1 phase and G1/S transition	54	173	0.0121225	1.11022e-16	2.22045e-15	14.6536
G2/M Checkpoints	34	154	0.0107911	1.11022e-16	2.22045e-15	14.6536
S Phase	41	180	0.012613	1.11022e-16	2.22045e-15	14.6536
Mitotic G2-G2/M phases	43	214	0.0149954	1.11022e-16	2.22045e-15	14.6536
G2/M Transition	41	212	0.0148553	1.11022e-16	2.22045e-15	14.6536
Major pathway of rRNA processing in the nucleolus and cytosol	41	189	0.0132436	1.11022e-16	2.22045e-15	14.6536
Cell Cycle, Mitotic	162	596	0.041763	1.11022e-16	2.22045e-15	14.6536
G1/S Transition	47	150	0.0105108	1.11022e-16	2.22045e-15	14.6536
DNA Replication	43	174	0.0121926	1.11022e-16	2.22045e-15	14.6536
Nonsense-Mediated Decay (NMD)	39	124	0.00868895	1.11022e-16	2.22045e-15	14.6536
Cell Cycle	182	734	0.051433	1.11022e-16	2.22045e-15	14.6536
Nonsense Mediated Decay (NMD) enhanced by the Exon Junction Complex (EJC)	39	124	0.00868895	1.11022e-16	2.22045e-15	14.6536
Separation of Sister Chromatids	52	195	0.0136641	1.11022e-16	2.22045e-15	14.6536
Chromosome Maintenance	38	138	0.00966996	1.11022e-16	2.22045e-15	14.6536
M Phase	94	416	0.02915	1.11022e-16	2.22045e-15	14.6536
Cell Cycle Checkpoints	76	280	0.0196202	1.11022e-16	2.22045e-15	14.6536
L13a-mediated translational silencing of Ceruloplasmin expression	40	120	0.00840866	1.11022e-16	2.22045e-15	14.6536
EML4 and NUDC in mitotic spindle formation	45	121	0.00847873	1.11022e-16	2.22045e-15	14.6536
Eukaryotic Translation Termination	39	106	0.00742765	1.11022e-16	2.22045e-15	14.6536
Mitotic Metaphase and Anaphase	63	250	0.017518	1.11022e-16	2.22045e-15	14.6536
Eukaryotic Translation Initiation	40	130	0.00910938	1.11022e-16	2.22045e-15	14.6536
Mitotic Anaphase	62	249	0.017448	1.11022e-16	2.22045e-15	14.6536
Cap-dependent Translation Initiation	40	130	0.00910938	1.11022e-16	2.22045e-15	14.6536
rRNA processing in the nucleus and cytosol	41	207	0.0145049	1.11022e-16	2.22045e-15	14.6536
RHO GTPases Activate Formins	47	149	0.0104408	1.11022e-16	2.22045e-15	14.6536
RHO GTPase Effectors	59	326	0.0228435	1.11022e-16	2.22045e-15	14.6536
Selenocysteine synthesis	39	112	0.00784808	1.11022e-16	2.22045e-15	14.6536
Response of EIF2AK4 (GCN2) to amino acid deficiency	39	115	0.0080583	1.11022e-16	2.22045e-15	14.6536
Regulation of expression of SLITs and ROBOs	39	183	0.0128232	1.11022e-16	2.22045e-15	14.6536
Cellular responses to stress	91	952	0.0667087	1.11022e-16	2.22045e-15	14.6536
Cellular responses to stimuli	91	970	0.06797	1.11022e-16	2.22045e-15	14.6536
Influenza Viral RNA Transcription and Replication	40	176	0.0123327	1.11022e-16	2.22045e-15	14.6536
Influenza Infection	43	200	0.0140144	1.11022e-16	2.22045e-15	14.6536
Cellular response to starvation	39	176	0.0123327	1.11022e-16	2.22045e-15	14.6536
Signaling by ROBO receptors	41	235	0.016467	1.11022e-16	2.22045e-15	14.6536
Selenoamino acid metabolism	39	180	0.012613	1.11022e-16	2.22045e-15	14.6536
Synthesis of DNA	31	133	0.0093196	2.22045e-16	4.21885e-15	14.3748
rRNA processing	41	245	0.0171677	2.22045e-16	4.21885e-15	14.3748
DNA Replication Pre-Initiation	29	120	0.00840866	7.77156e-16	1.4766e-14	13.8307
Homology Directed Repair	30	130	0.00910938	8.88178e-16	1.59872e-14	13.7962
HDR through Homologous Recombination (HRR) or Single Strand Annealing (SSA)	29	124	0.00868895	1.88738e-15	3.39728e-14	13.4689
Signaling by Rho GTPases	70	709	0.0496812	4.21885e-15	7.59393e-14	13.1195
Translation	46	339	0.0237545	7.10543e-15	1.20792e-13	12.918
Signaling by Rho GTPases, Miro GTPases and RHOBTB3	70	725	0.0508023	1.24345e-14	2.11386e-13	12.6749
DNA Double-Strand Break Repair	32	168	0.0117721	1.69864e-14	2.88769e-13	12.5394
Activation of ATR in response to replication stress	17	39	0.00273281	9.27036e-14	1.57208e-12	11.8035
DNA Repair	47	380	0.0266274	9.82547e-14	1.57208e-12	11.8035
Transcriptional Regulation by E2F6	18	46	0.00322332	1.04361e-13	1.66978e-12	11.7773
Metabolism of RNA	71	783	0.0548665	1.58984e-13	2.54374e-12	11.5945
AURKA Activation by TPX2	21	74	0.00518534	4.13114e-13	6.60982e-12	11.1798
Recruitment of NuMA to mitotic centrosomes	23	97	0.006797	1.18572e-12	1.77858e-11	10.7499
Processing of DNA double-strand break ends	22	90	0.0063065	2.05203e-12	3.07804e-11	10.5117
HDR through Homologous Recombination (HRR)	20	72	0.0050452	2.18892e-12	3.28337e-11	10.4837
G2/M DNA damage checkpoint	21	81	0.00567585	2.21256e-12	3.31885e-11	10.479
Regulation of PLK1 Activity at G2/M Transition	22	92	0.00644664	3.12517e-12	4.37523e-11	10.359
Recognition of DNA damage by PCNA-containing replication complex	14	30	0.00210217	5.81923e-12	8.14693e-11	10.089
Kinesins	19	68	0.00476491	7.04614e-12	9.8646e-11	10.0059
Cellular Senescence	31	200	0.0140144	8.14859e-12	1.1408e-10	9.94279
Lagging Strand Synthesis	13	26	0.00182188	1.43285e-11	2.006e-10	9.69767
Polo-like kinase mediated events	12	23	0.00161166	5.39573e-11	7.01445e-10	9.15401
PCNA-Dependent Long Patch Base Excision Repair	12	23	0.00161166	5.39573e-11	7.01445e-10	9.15401
Homologous DNA Pairing and Strand Exchange	15	44	0.00308318	7.83785e-11	1.01892e-09	8.99186
Telomere Maintenance	22	111	0.00777801	1.06977e-10	1.3907e-09	8.85677
Loss of proteins required for interphase microtubule organization from the centrosome	18	71	0.00497512	1.17861e-10	1.49017e-09	8.82676
Loss of Nlp from mitotic centrosomes	18	71	0.00497512	1.17861e-10	1.49017e-09	8.82676
G0 and Early G1	14	38	0.00266274	1.24181e-10	1.49017e-09	8.82676
Recruitment of mitotic centrosome proteins and complexes	19	81	0.00567585	1.30135e-10	1.56161e-09	8.80643
Centrosome maturation	19	83	0.00581599	1.94277e-10	2.33132e-09	8.6324
Gap-filling DNA repair synthesis and ligation in GG-NER	12	27	0.00189195	3.26613e-10	3.91935e-09	8.40679
Presynaptic phase of homologous DNA pairing and strand exchange	14	41	0.00287296	3.27754e-10	3.93305e-09	8.40527
Formation of the ternary complex, and subsequently, the 43S complex	15	54	0.0037839	1.2387e-09	1.48643e-08	7.82785
Condensation of Prophase Chromosomes	15	55	0.00385397	1.58114e-09	1.89737e-08	7.72185
Regulation of TP53 Activity through Phosphorylation	19	95	0.00665686	1.73494e-09	1.90844e-08	7.71932
Resolution of AP sites via the multiple-nucleotide patch replacement pathway	12	32	0.00224231	2.15006e-09	2.36506e-08	7.62616
DNA Damage Bypass	15	57	0.00399411	2.53862e-09	2.79249e-08	7.55401
Nuclear Envelope (NE) Reassembly	18	88	0.00616635	3.29752e-09	3.62727e-08	7.44042
Mitotic Prophase	22	135	0.00945974	3.73276e-09	4.10604e-08	7.38658
Base Excision Repair	19	100	0.00700722	3.93074e-09	4.32382e-08	7.36413
Extension of Telomeres	16	69	0.00483498	4.39201e-09	4.83121e-08	7.31594
Telomere C-strand (Lagging Strand) Synthesis	14	51	0.00357368	5.1005e-09	5.61055e-08	7.25099
Assembly of the pre-replicative complex	19	102	0.00714736	5.37845e-09	5.74486e-08	7.24072
Termination of translesion DNA synthesis	12	35	0.00245253	5.74486e-09	5.74486e-08	7.24072
Axon guidance	50	585	0.0409922	5.82262e-09	5.82262e-08	7.23488
Meiosis	18	92	0.00644664	6.47594e-09	6.47594e-08	7.1887
Defective pyroptosis	14	52	0.00364375	6.48918e-09	6.48918e-08	7.18781
Polymerase switching	9	16	0.00112115	7.31367e-09	6.58231e-08	7.18162
Leading Strand Synthesis	9	16	0.00112115	7.31367e-09	6.58231e-08	7.18162
Translation initiation complex formation	15	62	0.00434447	7.66895e-09	6.90205e-08	7.16102
COPI-dependent Golgi-to-ER retrograde traffic	19	107	0.00749772	1.14157e-08	1.02742e-07	6.98825
Ribosomal scanning and start codon recognition	15	64	0.00448462	1.16017e-08	1.04415e-07	6.98124
Unwinding of DNA	8	12	0.000840866	1.37902e-08	1.24111e-07	6.90619
Activation of the mRNA upon binding of the cap-binding complex and eIFs, and subsequent binding to 43S	15	66	0.00462476	1.72961e-08	1.55665e-07	6.80781
HDR through Single Strand Annealing (SSA)	12	39	0.00273281	1.86073e-08	1.67466e-07	6.77607
Anchoring of the basal body to the plasma membrane	18	99	0.00693715	1.94725e-08	1.75253e-07	6.75634
Apoptosis induced DNA fragmentation	8	13	0.000910938	2.53895e-08	2.28505e-07	6.6411
Transcription of E2F targets under negative control by DREAM complex	10	25	0.0017518	2.59421e-08	2.33479e-07	6.63175
SUMOylation	25	192	0.0134539	2.60873e-08	2.34786e-07	6.62933
Oxidative Stress Induced Senescence	19	114	0.00798823	3.05613e-08	2.4449e-07	6.61174
Processive synthesis on the lagging strand	9	19	0.00133137	3.13626e-08	2.50901e-07	6.6005
Nervous system development	50	621	0.0435148	3.74547e-08	2.99638e-07	6.5234
APC/C-mediated degradation of cell cycle proteins	17	92	0.00644664	3.83141e-08	3.06513e-07	6.51355
Regulation of mitotic cell cycle	17	92	0.00644664	3.83141e-08	3.06513e-07	6.51355
SUMO E3 ligases SUMOylate target proteins	24	183	0.0128232	4.34995e-08	3.47996e-07	6.45843
Transcription of E2F targets under negative control by p107 (RBL1) and p130 (RBL2) in complex with HDAC1	9	20	0.00140144	4.82797e-08	3.86238e-07	6.41315
Condensation of Prometaphase Chromosomes	8	15	0.00105108	7.51321e-08	6.01057e-07	6.22108
Transcriptional Regulation by TP53	42	487	0.0341251	8.10649e-08	6.48519e-07	6.18808
Regulation of TP53 Activity	23	178	0.0124728	1.07701e-07	8.61608e-07	6.06469
Diseases of programmed cell death	16	90	0.0063065	1.60177e-07	1.28142e-06	5.89231
Translesion synthesis by Y family DNA polymerases bypasses lesions on DNA template	12	48	0.00336346	1.70382e-07	1.3e-06	5.88606
Resolution of Abasic Sites (AP sites)	12	48	0.00336346	1.70382e-07	1.3e-06	5.88606
Meiotic recombination	13	58	0.00406419	1.8024e-07	1.3e-06	5.88606
Polymerase switching on the C-strand of the telomere	10	31	0.00217224	1.85715e-07	1.3e-06	5.88606
mRNA Splicing - Major Pathway	23	185	0.0129634	2.09907e-07	1.46935e-06	5.83288
Cyclin A/B1/B2 associated events during G2/M transition	10	32	0.00224231	2.47463e-07	1.73224e-06	5.76139
Dual Incision in GG-NER	11	41	0.00287296	2.79398e-07	1.95579e-06	5.70868
DNA Damage/Telomere Stress Induced Senescence	14	71	0.00497512	2.81701e-07	1.97191e-06	5.70511
Removal of the Flap Intermediate	8	18	0.0012613	2.9532e-07	2.06724e-06	5.68461
APC-Cdc20 mediated degradation of Nek2A	9	26	0.00182188	4.27093e-07	2.98965e-06	5.52438
Translesion synthesis by REV1	8	19	0.00133137	4.41729e-07	3.0921e-06	5.50975
Reproduction	18	123	0.00861888	4.57503e-07	3.20252e-06	5.49451
PRC2 methylates histones and DNA	11	44	0.00308318	5.54249e-07	3.87974e-06	5.4112
mRNA Splicing	23	196	0.0137341	5.60989e-07	3.92692e-06	5.40595
Initiation of Nuclear Envelope (NE) Reformation	9	27	0.00189195	5.82006e-07	4.07404e-06	5.38997
Translesion synthesis by POLI	8	20	0.00140144	6.46228e-07	4.5236e-06	5.34452
Gap-filling DNA repair synthesis and ligation in TC-NER	13	66	0.00462476	7.55219e-07	5.28653e-06	5.27683
Translesion synthesis by POLK	8	21	0.00147152	9.26668e-07	6.48668e-06	5.18798
Golgi-to-ER retrograde transport	19	148	0.0103707	1.50266e-06	1.05186e-05	4.97804
Factors involved in megakaryocyte development and platelet production	22	194	0.013594	1.70612e-06	1.19429e-05	4.92289
Regulation of APC/C activators between G1/S and early anaphase	14	83	0.00581599	1.72938e-06	1.21056e-05	4.91701
Meiotic synapsis	12	62	0.00434447	2.38961e-06	1.43377e-05	4.84352
Translesion Synthesis by POLH	8	24	0.00168173	2.46581e-06	1.47949e-05	4.82989
E2F mediated regulation of DNA replication	8	24	0.00168173	2.46581e-06	1.47949e-05	4.82989
Infectious disease	79	1357	0.0950879	3.0518e-06	1.83108e-05	4.73729
Apoptotic execution phase	11	54	0.0037839	3.88428e-06	2.33057e-05	4.63254
Activation of APC/C and APC/C:Cdc20 mediated degradation of mitotic proteins	13	77	0.00539556	3.99086e-06	2.39451e-05	4.62078
Processing of Capped Intron-Containing Pre-mRNA	25	256	0.0179385	4.63789e-06	2.78274e-05	4.55553
Senescence-Associated Secretory Phenotype (SASP)	14	91	0.00637657	4.89698e-06	2.93819e-05	4.53192
G2/M DNA replication checkpoint	5	7	0.000490505	5.4266e-06	3.25596e-05	4.48732
Global Genome Nucleotide Excision Repair (GG-NER)	14	92	0.00644664	5.53293e-06	3.31976e-05	4.47889
Cilium Assembly	22	210	0.0147152	5.90675e-06	3.54405e-05	4.4505
RHO GTPases activate IQGAPs	9	36	0.0025226	5.90973e-06	3.54584e-05	4.45028
Dual incision in TC-NER	12	68	0.00476491	6.02242e-06	3.61345e-05	4.44208
Switching of origins to a post-replicative state	14	93	0.00651671	6.24116e-06	3.7447e-05	4.42658
Aggrephagy	10	47	0.00329339	7.32972e-06	4.39783e-05	4.35676
The role of GTSE1 in G2/M progression after G2 checkpoint	13	83	0.00581599	8.79939e-06	5.27963e-05	4.2774
Phosphorylation of Emi1	5	8	0.000560577	1.02857e-05	6.17142e-05	4.20962
Inhibition of the proteolytic activity of APC/C required for the onset of anaphase by mitotic spindle checkpoint components	7	21	0.00147152	1.05052e-05	6.30312e-05	4.20044
Inactivation of APC/C via direct inhibition of the APC/C complex	7	21	0.00147152	1.05052e-05	6.30312e-05	4.20044
Transcription-Coupled Nucleotide Excision Repair (TC-NER)	13	85	0.00595613	1.12759e-05	6.76552e-05	4.1697
Microtubule-dependent trafficking of connexons from Golgi to the plasma membrane	7	22	0.00154159	1.41274e-05	8.47642e-05	4.07179
Mitotic Telophase/Cytokinesis	6	15	0.00105108	1.64701e-05	9.36281e-05	4.02859
Chk1/Chk2(Cds1) mediated inactivation of Cyclin B:Cdk1 complex	6	15	0.00105108	1.64701e-05	9.36281e-05	4.02859
APC/C:Cdc20 mediated degradation of mitotic proteins	12	76	0.00532549	1.79039e-05	9.36281e-05	4.02859
Transport of connexons to the plasma membrane	7	23	0.00161166	1.87256e-05	9.36281e-05	4.02859
Nucleotide Excision Repair	15	119	0.00833859	2.31005e-05	0.000115502	3.93741
MHC class II antigen presentation	17	149	0.0104408	2.35321e-05	0.00011766	3.92937
Diseases of DNA Double-Strand Break Repair	7	24	0.00168173	2.44943e-05	0.000122472	3.91196
APC/C:Cdc20 mediated degradation of Cyclin B	7	24	0.00168173	2.44943e-05	0.000122472	3.91196
Defective HDR through Homologous Recombination (HRR) due to PALB2 loss of function	7	24	0.00168173	2.44943e-05	0.000122472	3.91196
Defective HDR through Homologous Recombination Repair (HRR) due to PALB2 loss of BRCA2/RAD51/RAD51C binding function	7	24	0.00168173	2.44943e-05	0.000122472	3.91196
Defective HDR through Homologous Recombination (HRR) due to BRCA1 loss-of-function	7	24	0.00168173	2.44943e-05	0.000122472	3.91196
Defective HDR through Homologous Recombination Repair (HRR) due to PALB2 loss of BRCA1 binding function	7	24	0.00168173	2.44943e-05	0.000122472	3.91196
Positive epigenetic regulation of rRNA expression	12	80	0.00560577	2.93146e-05	0.000146573	3.83395
Activation of AMPK downstream of NMDARs	8	34	0.00238245	2.96992e-05	0.000148496	3.82829
Formation of Senescence-Associated Heterochromatin Foci (SAHF)	6	17	0.00119123	3.29438e-05	0.000164719	3.78326
Epigenetic regulation of gene expression	16	139	0.00974003	3.66045e-05	0.000183023	3.7375
DNA methylation	8	36	0.0025226	4.42101e-05	0.000221051	3.65551
Aberrant regulation of mitotic cell cycle due to RB1 defects	8	36	0.0025226	4.42101e-05	0.000221051	3.65551
Diseases of DNA repair	8	37	0.00259267	5.3434e-05	0.00026717	3.57321
ERCC6 (CSB) and EHMT2 (G9a) positively regulate rRNA expression	9	48	0.00336346	5.48838e-05	0.000274419	3.56159
Orc1 removal from chromatin	11	73	0.00511527	5.99927e-05	0.000299963	3.52293
Diseases of mitotic cell cycle	8	38	0.00266274	6.42065e-05	0.000321033	3.49345
APC:Cdc20 mediated degradation of cell cycle proteins prior to satisfation of the cell cycle checkpoint	11	74	0.00518534	6.75916e-05	0.000337958	3.47114
SUMOylation of DNA replication proteins	9	50	0.00350361	7.46392e-05	0.000373196	3.42806
Phosphorylation of the APC/C	6	20	0.00140144	8.01148e-05	0.000400574	3.39732
Cyclin D associated events in G1	9	51	0.00357368	8.65678e-05	0.000432839	3.36367
G1 Phase	9	51	0.00357368	8.65678e-05	0.000432839	3.36367
Assembly of the ORC complex at the origin of replication	8	40	0.00280289	9.12052e-05	0.000456026	3.34101
Resolution of D-loop Structures through Synthesis-Dependent Strand Annealing (SDSA)	7	30	0.00210217	9.79574e-05	0.000489787	3.30999
TP53 Regulates Transcription of Genes Involved in G2 Cell Cycle Arrest	6	21	0.00147152	0.000104315	0.000521577	3.28268
TP53 Regulates Transcription of Cell Cycle Genes	10	65	0.00455469	0.000108835	0.000544175	3.26426
G2 Phase	4	7	0.000490505	0.000114471	0.000572353	3.24234
RMTs methylate histone arginines	9	53	0.00371383	0.000115265	0.000576325	3.23933
Mismatch repair (MMR) directed by MSH2:MSH3 (MutSbeta)	6	22	0.00154159	0.000133991	0.000669957	3.17395
Mismatch repair (MMR) directed by MSH2:MSH6 (MutSalpha)	6	22	0.00154159	0.000133991	0.000669957	3.17395
Mismatch Repair	6	23	0.00161166	0.00016999	0.000849951	3.07061
Inhibition of replication initiation of damaged DNA by RB1/E2F1	5	15	0.00105108	0.000195767	0.000978835	3.00929
Transcriptional regulation of granulopoiesis	10	71	0.00497512	0.000219613	0.0010514	2.97823
DNA replication initiation	5	16	0.00112115	0.000262851	0.0010514	2.97823
Post-chaperonin tubulin folding pathway	6	25	0.0017518	0.000264699	0.0010588	2.97519
Cdc20:Phospho-APC/C mediated degradation of Cyclin A	10	73	0.00511527	0.00027299	0.00109196	2.96179
Gene and protein expression by JAK-STAT signaling after Interleukin-12 stimulation	10	73	0.00511527	0.00027299	0.00109196	2.96179
Intra-Golgi and retrograde Golgi-to-ER traffic	19	219	0.0153458	0.00028101	0.00112404	2.94922
Metabolism of amino acids and derivatives	41	665	0.046598	0.000282938	0.00113175	2.94625
Resolution of D-loop Structures through Holliday Junction Intermediates	7	36	0.0025226	0.000294534	0.00117814	2.9288
Activation of NIMA Kinases NEK9, NEK6, NEK7	4	9	0.00063065	0.000296326	0.0011853	2.92617
Metabolism of proteins	105	2205	0.154509	0.000300636	0.00120254	2.9199
Selective autophagy	11	89	0.00623642	0.00032657	0.00130628	2.88396
Defective binding of RB1 mutants to E2F1,(E2F2, E2F3)	5	17	0.00119123	0.00034609	0.00138436	2.85875
Aberrant regulation of mitotic G1/S transition in cancer due to RB1 defects	5	17	0.00119123	0.00034609	0.00138436	2.85875
Resolution of D-Loop Structures	7	37	0.00259267	0.000346544	0.00138618	2.85818
B-WICH complex positively regulates rRNA expression	9	62	0.00434447	0.000361339	0.00144536	2.84003
Organelle biogenesis and maintenance	25	338	0.0236844	0.000368297	0.00147319	2.83174
Recognition and association of DNA glycosylase with site containing an affected purine	7	39	0.00273281	0.000472579	0.00189031	2.72347
Sealing of the nuclear envelope (NE) by ESCRT-III	7	39	0.00273281	0.000472579	0.00189031	2.72347
Downregulation of TGF-beta receptor signaling	6	28	0.00196202	0.000479408	0.00191763	2.71724
Developmental Biology	66	1263	0.0885012	0.000481086	0.00192434	2.71572
SUMOylation of DNA damage response and repair proteins	10	81	0.00567585	0.00060716	0.00242864	2.61464
Recruitment and ATM-mediated phosphorylation of repair and signaling proteins at DNA double strand breaks	9	67	0.00469484	0.000625636	0.00250255	2.60162
Gap junction assembly	7	41	0.00287296	0.000632719	0.00253088	2.59673
Formation of tubulin folding intermediates by CCT/TriC	6	30	0.00210217	0.000684891	0.00273956	2.56232
Recognition and association of DNA glycosylase with site containing an affected pyrimidine	7	42	0.00294303	0.000727495	0.00290998	2.53611
Recycling pathway of L1	8	55	0.00385397	0.000747898	0.00299159	2.5241
Interleukin-12 signaling	10	84	0.00588606	0.00079825	0.003193	2.4958
mRNA Splicing - Minor Pathway	8	56	0.00392404	0.000838783	0.00335513	2.47429
MASTL Facilitates Mitotic Progression	4	12	0.000840866	0.000863718	0.00345487	2.46157
mRNA decay by 5' to 3' exoribonuclease	5	21	0.00147152	0.000890204	0.00356082	2.44845
HSP90 chaperone cycle for steroid hormone receptors (SHR) in the presence of ligand	9	72	0.0050452	0.00103043	0.00412173	2.38492
RNA Polymerase I Promoter Clearance	10	87	0.00609628	0.00103626	0.00414504	2.38247
Cleavage of the damaged purine	7	45	0.00315325	0.00108068	0.00432273	2.36424
Removal of the Flap Intermediate from the C-strand	5	22	0.00154159	0.00109243	0.00436973	2.35955
Processive synthesis on the C-strand of the telomere	6	33	0.00231238	0.00111364	0.00445457	2.35119
Establishment of Sister Chromatid Cohesion	4	13	0.000910938	0.00115806	0.00463224	2.33421
Depurination	7	46	0.00322332	0.00122434	0.00489738	2.31004
RNA Polymerase I Transcription	10	89	0.00623642	0.00122504	0.00490017	2.30979
Apoptosis	16	192	0.0134539	0.0012501	0.00500039	2.301
Packaging Of Telomere Ends	6	34	0.00238245	0.00129462	0.00517848	2.2858
RNA Polymerase I Promoter Opening	6	34	0.00238245	0.00129462	0.00517848	2.2858
DNA Double Strand Break Response	9	75	0.00525541	0.00136102	0.00544409	2.26407
HCMV Early Events	17	215	0.0150655	0.00155299	0.00621196	2.20677
Gene expression (Transcription)	87	1855	0.129984	0.00171855	0.0068742	2.16278
TGF-beta receptor signaling activates SMADs	6	36	0.0025226	0.00172315	0.00689259	2.16162
PKMTs methylate histone lysines	7	49	0.00343354	0.00174655	0.00698618	2.15576
Assembly and cell surface presentation of NMDA receptors	7	49	0.00343354	0.00174655	0.00698618	2.15576
Programmed Cell Death	18	238	0.0166772	0.00185224	0.00740897	2.13024
RNA Polymerase I Promoter Escape	8	64	0.00448462	0.00192944	0.00764716	2.1165
Cooperation of Prefoldin and TriC/CCT in actin and tubulin folding	6	37	0.00259267	0.00197401	0.00764716	2.1165
Interleukin-12 family signaling	10	96	0.00672693	0.00211842	0.00764716	2.1165
Nuclear Envelope Breakdown	8	65	0.00455469	0.00212107	0.00764716	2.1165
Cleavage of the damaged pyrimidine	7	51	0.00357368	0.00218092	0.00764716	2.1165
Depyrimidination	7	51	0.00357368	0.00218092	0.00764716	2.1165
RNA Polymerase II Transcription	80	1694	0.118702	0.00223974	0.00764716	2.1165
Early Phase of HIV Life Cycle	5	26	0.00182188	0.00225325	0.00764716	2.1165
Translocation of SLC2A4 (GLUT4) to the plasma membrane	9	81	0.00567585	0.00227713	0.00764716	2.1165
Gap junction trafficking	7	52	0.00364375	0.00242719	0.00764716	2.1165
RNA Polymerase II Transcription Termination	8	67	0.00469484	0.00254905	0.00764716	2.1165
Activation of HOX genes during differentiation	11	116	0.00812837	0.00266647	0.0079994	2.09694
Activation of anterior HOX genes in hindbrain development during early embryogenesis	11	116	0.00812837	0.00266647	0.0079994	2.09694
Fanconi Anemia Pathway	7	53	0.00371383	0.00269432	0.00808297	2.09243
Golgi Cisternae Pericentriolar Stack Reorganization	4	17	0.00119123	0.00304182	0.00912547	2.03974
Carboxyterminal post-translational modifications of tubulin	7	55	0.00385397	0.00329577	0.0098873	2.00492
Prefoldin mediated transfer of substrate to CCT/TriC	5	29	0.00203209	0.00357925	0.0107377	1.96909
Gap junction trafficking and regulation	7	56	0.00392404	0.0036324	0.0108972	1.96268
Oncogene Induced Senescence	6	42	0.00294303	0.00366376	0.0109913	1.95895
Cyclin E associated events during G1/S transition	9	88	0.00616635	0.0039033	0.0117099	1.93145
E2F-enabled inhibition of pre-replication complex formation	3	9	0.00063065	0.00391126	0.0117338	1.93056
Chromatin modifying enzymes	18	256	0.0179385	0.00394822	0.0118447	1.92648
Chromatin organization	18	256	0.0179385	0.00394822	0.0118447	1.92648
HSF1 activation	6	43	0.0030131	0.00410135	0.0123041	1.90995
Regulation of TP53 Degradation	6	43	0.0030131	0.00410135	0.0123041	1.90995
Pre-NOTCH Transcription and Translation	9	89	0.00623642	0.00419538	0.0125861	1.90011
Cyclin A:Cdk2-associated events at S phase entry	9	90	0.0063065	0.00450425	0.0135127	1.86926
APC/C:Cdh1 mediated degradation of Cdc20 and other APC/C:Cdh1 targeted proteins in late mitosis/early G1	8	74	0.00518534	0.00459932	0.013798	1.86018
SIRT1 negatively regulates rRNA expression	6	45	0.00315325	0.00509083	0.0152725	1.81609
SLBP independent Processing of Histone Pre-mRNAs	3	10	0.000700722	0.00523156	0.0156947	1.80425
Cohesin Loading onto Chromatin	3	10	0.000700722	0.00523156	0.0156947	1.80425
Disease	106	2431	0.170345	0.00530379	0.0159114	1.79829
TP53 Regulates Transcription of Genes Involved in G1 Cell Cycle Arrest	4	20	0.00140144	0.00537827	0.0161348	1.79224
Metalloprotease DUBs	5	32	0.00224231	0.00538904	0.0161671	1.79137
Regulation of TP53 Expression and Degradation	6	46	0.00322332	0.00564642	0.0169393	1.77111
Generic Transcription Pathway	72	1555	0.108962	0.00599798	0.0179939	1.74487
RHOC GTPase cycle	8	79	0.0055357	0.00670685	0.0201206	1.69636
Post NMDA receptor activation events	9	96	0.00672693	0.00674638	0.0202391	1.69381
COPI-independent Golgi-to-ER retrograde traffic	7	63	0.00441455	0.00677167	0.020315	1.69218
Base-Excision Repair, AP Site Formation	7	63	0.00441455	0.00677167	0.020315	1.69218
CDC6 association with the ORC:origin complex	3	11	0.000770794	0.00679001	0.02037	1.69101
SLBP Dependent Processing of Replication-Dependent Histone Pre-mRNAs	3	11	0.000770794	0.00679001	0.02037	1.69101
Inhibition of DNA recombination at telomere	6	48	0.00336346	0.00688852	0.0206655	1.68475
NoRC negatively regulates rRNA expression	8	80	0.00560577	0.007204	0.021612	1.6653
Conversion from APC/C:Cdc20 to APC/C:Cdh1 in late anaphase	4	22	0.00154159	0.00746579	0.0223974	1.6498
Activated PKN1 stimulates transcription of AR (androgen receptor) regulated genes KLK2 and KLK3	6	49	0.00343354	0.0075787	0.0227361	1.64328
Mitotic Metaphase/Anaphase Transition	2	4	0.000280289	0.00862977	0.0258893	1.58688
Chaperone Mediated Autophagy	4	23	0.00161166	0.0086846	0.0260538	1.58413
Depolymerisation of the Nuclear Lamina	4	23	0.00161166	0.0086846	0.0260538	1.58413
Signaling by TGF-beta Receptor Complex	8	87	0.00609628	0.011499	0.0344969	1.46222
Utilization of Ketone Bodies	3	14	0.00098101	0.0129831	0.0389494	1.4095
Negative epigenetic regulation of rRNA expression	8	89	0.00623642	0.013015	0.0390449	1.40844
Amyloid fiber formation	8	89	0.00623642	0.013015	0.0390449	1.40844
TP53 Regulates Transcription of DNA Repair Genes	8	89	0.00623642	0.013015	0.0390449	1.40844
Phosphorylation of proteins involved in the G2/M transition by Cyclin A:Cdc2 complexes	2	5	0.000350361	0.0131833	0.03955	1.40285
HCMV Infection	17	270	0.0189195	0.0137881	0.0413642	1.38338
Autophagy	12	166	0.011632	0.0137992	0.0413975	1.38303
Intraflagellar transport	6	56	0.00392404	0.0138673	0.0416019	1.38089
RHOD GTPase cycle	6	57	0.00399411	0.0149944	0.0449832	1.34695
Nonhomologous End-Joining (NHEJ)	6	57	0.00399411	0.0149944	0.0449832	1.34695
APOBEC3G mediated resistance to HIV-1 infection	3	15	0.00105108	0.0155744	0.0467231	1.33047
Integration of provirus	3	15	0.00105108	0.0155744	0.0467231	1.33047
RHOB GTPase cycle	7	75	0.00525541	0.0162749	0.0488247	1.31136
Macroautophagy	11	150	0.0105108	0.0163158	0.0489474	1.31027
Activation of NMDA receptors and postsynaptic events	9	113	0.00791816	0.0177762	0.0533285	1.27304
Activation of NOXA and translocation to mitochondria	2	6	0.000420433	0.0185619	0.0556856	1.25426
Pre-NOTCH Expression and Processing	9	114	0.00798823	0.0186894	0.0560682	1.25128
Estrogen-dependent gene expression	11	154	0.0107911	0.0193537	0.0580612	1.23611
Chaperonin-mediated protein folding	8	96	0.00672693	0.0194795	0.0584386	1.2333
RUNX1 regulates genes involved in megakaryocyte differentiation and platelet function	7	78	0.00546563	0.0196621	0.0589862	1.22925
RHO GTPases activate PKNs	7	80	0.00560577	0.0221764	0.0665292	1.17699
Interconversion of nucleotide di- and triphosphates	7	80	0.00560577	0.0221764	0.0665292	1.17699
HDACs deacetylate histones	6	63	0.00441455	0.0231116	0.0693347	1.15905
HIV Life Cycle	12	179	0.0125429	0.0231293	0.0693879	1.15872
Transcriptional regulation by small RNAs	7	81	0.00567585	0.0235134	0.0705403	1.15156
Interactions of Rev with host cellular proteins	5	47	0.00329339	0.0244126	0.0732379	1.13526
SUMO is transferred from E1 to E2 (UBE2I, UBC9)	2	7	0.000490505	0.0247046	0.0741138	1.1301
Deadenylation-dependent mRNA decay	6	65	0.00455469	0.0263663	0.0790988	1.10183
Protein folding	8	102	0.00714736	0.0266156	0.0798469	1.09774
Synthesis of active ubiquitin: roles of E1 and E2 enzymes	4	33	0.00231238	0.0282653	0.0847958	1.07163
Protein methylation	3	19	0.00133137	0.0286526	0.0859578	1.06571
Formation of the beta-catenin:TCF transactivating complex	6	67	0.00469484	0.0299117	0.0897351	1.04704
SUMO is conjugated to E1 (UBA2:SAE1)	2	8	0.000560577	0.0315539	0.0946618	1.02383
Aberrant regulation of mitotic exit in cancer due to RB1 defects	3	20	0.00140144	0.0326014	0.0978041	1.00964
NEIL3-mediated resolution of ICLs	1	1	7.00722e-05	0.0338215	0.101464	0.993686
Defective Base Excision Repair Associated with NEIL3	1	1	7.00722e-05	0.0338215	0.101464	0.993686
Autointegration results in viral DNA circles	2	9	0.00063065	0.0390552	0.117166	0.9312
Integration of viral DNA into host genomic DNA	2	9	0.00063065	0.0390552	0.117166	0.9312
Telomere C-strand synthesis initiation	3	22	0.00154159	0.0413011	0.123903	0.906917
RHOA GTPase cycle	10	154	0.0107911	0.0430776	0.129233	0.888628
RHO GTPases activate CIT	3	23	0.00161166	0.046045	0.133003	0.87614
CDK-mediated phosphorylation and removal of Cdc6	6	75	0.00525541	0.0471493	0.133003	0.87614
Uptake and function of diphtheria toxin	2	10	0.000700722	0.0471567	0.133003	0.87614
Activation of PUMA and translocation to mitochondria	2	10	0.000700722	0.0471567	0.133003	0.87614
Signaling by TGFB family members	8	116	0.00812837	0.0498761	0.133003	0.87614
mRNA 3'-end processing	5	58	0.00406419	0.0518827	0.133003	0.87614
Gene Silencing by RNA	8	120	0.00840866	0.0583741	0.133003	0.87614
Calcineurin activates NFAT	2	12	0.000840866	0.0649669	0.133003	0.87614
HuR (ELAVL1) binds and stabilizes mRNA	2	12	0.000840866	0.0649669	0.133003	0.87614
SCF(Skp2)-mediated degradation of p27/p21	5	62	0.00434447	0.0650481	0.133003	0.87614
Evasion of Oncogene Induced Senescence Due to Defective p16INK4A binding to CDK4	1	2	0.000140144	0.0665013	0.133003	0.87614
Evasion of Oxidative Stress Induced Senescence Due to Defective p16INK4A binding to CDK4	1	2	0.000140144	0.0665013	0.133003	0.87614
Defective DNA double strand break response due to BRCA1 loss of function	1	2	0.000140144	0.0665013	0.133003	0.87614
Defective DNA double strand break response due to BARD1 loss of function	1	2	0.000140144	0.0665013	0.133003	0.87614
Signaling by NOTCH	14	259	0.0181487	0.0676483	0.135297	0.868713
Hedgehog 'off' state	8	124	0.00868895	0.0677357	0.135471	0.868153
Signaling by NOTCH3	5	63	0.00441455	0.0686058	0.137212	0.862609
Rev-mediated nuclear export of HIV RNA	4	45	0.00315325	0.0715412	0.143082	0.844414
Protein ubiquitination	6	84	0.00588606	0.0726603	0.145321	0.837673
Processing of Capped Intronless Pre-mRNA	3	28	0.00196202	0.073505	0.14701	0.832653
NOTCH3 Activation and Transmission of Signal to the Nucleus	3	28	0.00196202	0.073505	0.14701	0.832653
Processing and activation of SUMO	2	13	0.000910938	0.0745853	0.149171	0.826317
Josephin domain DUBs	2	13	0.000910938	0.0745853	0.149171	0.826317
2-LTR circle formation	2	13	0.000910938	0.0745853	0.149171	0.826317
Pexophagy	2	13	0.000910938	0.0745853	0.149171	0.826317
RUNX1 regulates transcription of genes involved in differentiation of HSCs	7	106	0.00742765	0.0764673	0.152935	0.815494
COPI-mediated anterograde transport	7	107	0.00749772	0.0794183	0.158837	0.799049
Ketone body metabolism	3	29	0.00203209	0.0797022	0.159404	0.7975
snRNP Assembly	5	66	0.00462476	0.0799107	0.159821	0.796365
Metabolism of non-coding RNA	5	66	0.00462476	0.0799107	0.159821	0.796365
Host Interactions of HIV factors	9	151	0.0105809	0.0804976	0.160995	0.793187
Formation of Incision Complex in GG-NER	4	47	0.00329339	0.0808624	0.161725	0.791223
L1CAM interactions	8	130	0.00910938	0.0834173	0.166835	0.777714
APC/C:Cdc20 mediated degradation of Securin	5	68	0.00476491	0.0879664	0.175933	0.754653
HATs acetylate histones	7	110	0.00770794	0.0886627	0.177325	0.751229
HDR through MMEJ (alt-NHEJ)	2	15	0.00105108	0.0950411	0.190082	0.721058
POLB-Dependent Long Patch Base Excision Repair	2	15	0.00105108	0.0950411	0.190082	0.721058
ATF6 (ATF6-alpha) activates chaperone genes	2	15	0.00105108	0.0950411	0.190082	0.721058
Potential therapeutics for SARS	6	91	0.00637657	0.0970303	0.194061	0.712062
Evasion of Oxidative Stress Induced Senescence Due to p16INK4A Defects	1	3	0.000210217	0.0980779	0.196156	0.707399
Evasion of Oncogene Induced Senescence Due to p16INK4A Defects	1	3	0.000210217	0.0980779	0.196156	0.707399
Evasion of Oncogene Induced Senescence Due to Defective p16INK4A binding to CDK4 and CDK6	1	3	0.000210217	0.0980779	0.196156	0.707399
Evasion of Oxidative Stress Induced Senescence Due to Defective p16INK4A binding to CDK4 and CDK6	1	3	0.000210217	0.0980779	0.196156	0.707399
Breakdown of the nuclear lamina	1	3	0.000210217	0.0980779	0.196156	0.707399
Postmitotic nuclear pore complex (NPC) reformation	3	32	0.00224231	0.0995764	0.199153	0.700814
Regulation of mRNA stability by proteins that bind AU-rich elements	6	93	0.00651671	0.104703	0.209406	0.679011
Trafficking and processing of endosomal TLR	2	16	0.00112115	0.105802	0.211604	0.674475
ESR-mediated signaling	13	257	0.0180085	0.111068	0.222136	0.653381
CREB1 phosphorylation through the activation of Adenylate Cyclase	2	17	0.00119123	0.116871	0.233743	0.631262
ATF6 (ATF6-alpha) activates chaperones	2	17	0.00119123	0.116871	0.233743	0.631262
DARPP-32 events	3	35	0.00245253	0.12121	0.24242	0.615431
UCH proteinases	6	98	0.00686707	0.125209	0.250418	0.601334
NRIF signals cell death from the nucleus	2	18	0.0012613	0.128216	0.256431	0.591029
HIV Infection	13	264	0.0184991	0.128311	0.256623	0.590705
Drug resistance in ERBB2 KD mutants	1	4	0.000280289	0.128589	0.257177	0.589768
Drug-mediated inhibition of ERBB2 signaling	1	4	0.000280289	0.128589	0.257177	0.589768
Interaction between PHLDA1 and AURKA	1	4	0.000280289	0.128589	0.257177	0.589768
Resistance of ERBB2 KD mutants to afatinib	1	4	0.000280289	0.128589	0.257177	0.589768
Resistance of ERBB2 KD mutants to osimertinib	1	4	0.000280289	0.128589	0.257177	0.589768
Drug resistance in ERBB2 TMD/JMD mutants	1	4	0.000280289	0.128589	0.257177	0.589768
Resistance of ERBB2 KD mutants to lapatinib	1	4	0.000280289	0.128589	0.257177	0.589768
Resistance of ERBB2 KD mutants to trastuzumab	1	4	0.000280289	0.128589	0.257177	0.589768
Resistance of ERBB2 KD mutants to AEE788	1	4	0.000280289	0.128589	0.257177	0.589768
Resistance of ERBB2 KD mutants to neratinib	1	4	0.000280289	0.128589	0.257177	0.589768
Resistance of ERBB2 KD mutants to tesevatinib	1	4	0.000280289	0.128589	0.257177	0.589768
Resistance of ERBB2 KD mutants to sapitinib	1	4	0.000280289	0.128589	0.257177	0.589768
Diseases of cellular response to stress	1	4	0.000280289	0.128589	0.257177	0.589768
Diseases of Cellular Senescence	1	4	0.000280289	0.128589	0.257177	0.589768
The AIM2 inflammasome	1	4	0.000280289	0.128589	0.257177	0.589768
Downregulation of ERBB2 signaling	3	36	0.0025226	0.128774	0.257549	0.58914
Activation of BH3-only proteins	3	36	0.0025226	0.128774	0.257549	0.58914
Regulated Necrosis	5	77	0.00539556	0.129097	0.258195	0.588053
eNOS activation	3	37	0.00259267	0.136501	0.273003	0.563833
Tetrahydrobiopterin (BH4) synthesis, recycling, salvage and regulation	3	37	0.00259267	0.136501	0.273003	0.563833
Regulation of necroptotic cell death	3	38	0.00266274	0.144383	0.288766	0.539455
SMAD2/SMAD3:SMAD4 heterotrimer regulates transcription	3	38	0.00266274	0.144383	0.288766	0.539455
Apoptotic cleavage of cellular proteins	3	38	0.00266274	0.144383	0.288766	0.539455
CDT1 association with the CDC6:ORC:origin complex	4	59	0.00413426	0.147947	0.295894	0.528864
Transport of Mature mRNA derived from an Intron-Containing Transcript	5	81	0.00567585	0.149745	0.299489	0.523619
Regulation of MECP2 expression and activity	3	39	0.00273281	0.15241	0.30482	0.515956
Inhibition of nitric oxide production	1	5	0.000350361	0.158069	0.316138	0.500123
SUMOylation of chromatin organization proteins	4	62	0.00434447	0.167302	0.334604	0.475469
Metabolism of nitric oxide: NOS3 activation and regulation	3	41	0.00287296	0.168869	0.337738	0.47142
PINK1-PRKN Mediated Mitophagy	2	22	0.00154159	0.175746	0.351492	0.454084
Nuclear Pore Complex (NPC) Disassembly	3	42	0.00294303	0.177284	0.354569	0.4503
Triglyceride catabolism	3	42	0.00294303	0.177284	0.354569	0.4503
Autodegradation of Cdh1 by Cdh1:APC/C	4	64	0.00448462	0.180677	0.36076	0.442782
Intrinsic Pathway for Apoptosis	4	64	0.00448462	0.180677	0.36076	0.442782
Phosphorylation of proteins involved in G1/S transition by active Cyclin E:Cdk2 complexes	1	6	0.000420433	0.186554	0.36076	0.442782
TFAP2 (AP-2) family regulates transcription of cell cycle factors	1	6	0.000420433	0.186554	0.36076	0.442782
TNFR1-mediated ceramide production	1	6	0.000420433	0.186554	0.36076	0.442782
SUMO is proteolytically processed	1	6	0.000420433	0.186554	0.36076	0.442782
Cellular response to heat stress	7	135	0.00945974	0.187062	0.36076	0.442782
PKA activation	2	23	0.00161166	0.188033	0.36076	0.442782
Regulation of TP53 Activity through Methylation	2	23	0.00161166	0.188033	0.36076	0.442782
Gluconeogenesis	4	66	0.00462476	0.194394	0.36076	0.442782
Ovarian tumor domain proteases	3	44	0.00308318	0.194445	0.36076	0.442782
SUMOylation of transcription cofactors	3	44	0.00308318	0.194445	0.36076	0.442782
RHOBTB2 GTPase cycle	2	24	0.00168173	0.200432	0.36076	0.442782
The NLRP3 inflammasome	2	24	0.00168173	0.200432	0.36076	0.442782
Transport of Mature Transcript to Cytoplasm	5	90	0.0063065	0.200706	0.36076	0.442782
Deubiquitination	13	289	0.0202509	0.201106	0.36076	0.442782
Late Phase of HIV Life Cycle	8	164	0.0114918	0.207429	0.36076	0.442782
RHOF GTPase cycle	3	46	0.00322332	0.211994	0.36076	0.442782
RAS processing	3	46	0.00322332	0.211994	0.36076	0.442782
RIPK1-mediated regulated necrosis	3	46	0.00322332	0.211994	0.36076	0.442782
Negative regulation of MET activity	2	25	0.0017518	0.212923	0.36076	0.442782
Loss of phosphorylation of MECP2 at T308	1	7	0.000490505	0.214078	0.36076	0.442782
FLT3 signaling by CBL mutants	1	7	0.000490505	0.214078	0.36076	0.442782
SMAC(DIABLO)-mediated dissociation of IAP:caspase complexes	1	7	0.000490505	0.214078	0.36076	0.442782
SMAC (DIABLO) binds to IAPs	1	7	0.000490505	0.214078	0.36076	0.442782
Attenuation phase	3	47	0.00329339	0.220894	0.36076	0.442782
Regulation of PTEN gene transcription	4	70	0.00490505	0.222725	0.36076	0.442782
Signaling by Hedgehog	8	168	0.0117721	0.225384	0.36076	0.442782
Signaling by Ligand-Responsive EGFR Variants in Cancer	2	26	0.00182188	0.225486	0.36076	0.442782
Constitutive Signaling by Ligand-Responsive EGFR Cancer Variants	2	26	0.00182188	0.225486	0.36076	0.442782
PKA-mediated phosphorylation of CREB	2	26	0.00182188	0.225486	0.36076	0.442782
Transcriptional Regulation by VENTX	3	48	0.00336346	0.229868	0.36076	0.442782
rRNA modification in the nucleus and cytosol	4	71	0.00497512	0.229972	0.36076	0.442782
G1/S DNA Damage Checkpoints	4	72	0.0050452	0.237277	0.36076	0.442782
Assembly Of The HIV Virion	2	27	0.00189195	0.2381	0.36076	0.442782
Plus-strand DNA synthesis	1	8	0.000560577	0.240671	0.36076	0.442782
Noncanonical activation of NOTCH3	1	8	0.000560577	0.240671	0.36076	0.442782
PTK6 Regulates Cell Cycle	1	8	0.000560577	0.240671	0.36076	0.442782
Activation of caspases through apoptosome-mediated cleavage	1	8	0.000560577	0.240671	0.36076	0.442782
Aryl hydrocarbon receptor signalling	1	8	0.000560577	0.240671	0.36076	0.442782
VEGF ligand-receptor interactions	1	8	0.000560577	0.240671	0.36076	0.442782
CLEC7A/inflammasome pathway	1	8	0.000560577	0.240671	0.36076	0.442782
Cam-PDE 1 activation	1	8	0.000560577	0.240671	0.36076	0.442782
VEGF binds to VEGFR leading to receptor dimerization	1	8	0.000560577	0.240671	0.36076	0.442782
Release of apoptotic factors from the mitochondria	1	8	0.000560577	0.240671	0.36076	0.442782
SMAC, XIAP-regulated apoptotic response	1	8	0.000560577	0.240671	0.36076	0.442782
Maturation of protein E	1	8	0.000560577	0.240671	0.36076	0.442782
Maturation of protein E	1	8	0.000560577	0.240671	0.36076	0.442782
Diseases of Base Excision Repair	1	8	0.000560577	0.240671	0.36076	0.442782
RNA Polymerase I Transcription Initiation	3	50	0.00350361	0.248007	0.36076	0.442782
TP53 regulates transcription of several additional cell death genes whose specific roles in p53-dependent apoptosis remain uncertain	2	28	0.00196202	0.250749	0.36076	0.442782
Transcriptional regulation by the AP-2 (TFAP2) family of transcription factors	3	52	0.00364375	0.266354	0.36076	0.442782
Uncoating of the HIV Virion	1	9	0.00063065	0.266367	0.36076	0.442782
TNFR1-induced NFkappaB signaling pathway	2	30	0.00210217	0.276084	0.36076	0.442782
Neurodegenerative Diseases	2	30	0.00210217	0.276084	0.36076	0.442782
Deregulated CDK5 triggers multiple neurodegenerative pathways in Alzheimer's disease models	2	30	0.00210217	0.276084	0.36076	0.442782
Ub-specific processing proteases	9	206	0.0144349	0.281508	0.36076	0.442782
p53-Independent G1/S DNA damage checkpoint	3	54	0.0037839	0.284854	0.36076	0.442782
p53-Independent DNA Damage Response	3	54	0.0037839	0.284854	0.36076	0.442782
Ubiquitin Mediated Degradation of Phosphorylated Cdc25A	3	54	0.0037839	0.284854	0.36076	0.442782
Mitophagy	2	31	0.00217224	0.288739	0.36076	0.442782
HDMs demethylate histones	2	31	0.00217224	0.288739	0.36076	0.442782
SHOC2 M1731 mutant abolishes MRAS complex function	1	10	0.000700722	0.291195	0.36076	0.442782
Regulation of PTEN localization	1	10	0.000700722	0.291195	0.36076	0.442782
NR1H2 & NR1H3 regulate gene expression to limit cholesterol uptake	1	10	0.000700722	0.291195	0.36076	0.442782
SCF-beta-TrCP mediated degradation of Emi1	3	55	0.00385397	0.294145	0.36076	0.442782
Signaling by EGFR in Cancer	2	32	0.00224231	0.301369	0.36076	0.442782
Suppression of phagosomal maturation	2	32	0.00224231	0.301369	0.36076	0.442782
AUF1 (hnRNP D0) binds and destabilizes mRNA	3	56	0.00392404	0.303454	0.36076	0.442782
Transcriptional activity of SMAD2/SMAD3:SMAD4 heterotrimer	3	57	0.00399411	0.312777	0.36076	0.442782
Defective Intrinsic Pathway for Apoptosis	2	33	0.00231238	0.313959	0.36076	0.442782
Reverse Transcription of HIV RNA	1	11	0.000770794	0.315184	0.36076	0.442782
Minus-strand DNA synthesis	1	11	0.000770794	0.315184	0.36076	0.442782
Signaling by MRAS-complex mutants	1	11	0.000770794	0.315184	0.36076	0.442782
Gain-of-function MRAS complexes activate RAF signaling	1	11	0.000770794	0.315184	0.36076	0.442782
CREB1 phosphorylation through the activation of CaMKII/CaMKK/CaMKIV cascasde	1	11	0.000770794	0.315184	0.36076	0.442782
Myoclonic epilepsy of Lafora	1	11	0.000770794	0.315184	0.36076	0.442782
Downregulation of ERBB4 signaling	1	11	0.000770794	0.315184	0.36076	0.442782
Modulation by Mtb of host immune system	1	11	0.000770794	0.315184	0.36076	0.442782
ROBO receptors bind AKAP5	1	11	0.000770794	0.315184	0.36076	0.442782
RUNX1 regulates transcription of genes involved in differentiation of keratinocytes	1	11	0.000770794	0.315184	0.36076	0.442782
PTK6 Regulates RTKs and Their Effectors AKT1 and DOK1	1	11	0.000770794	0.315184	0.36076	0.442782
Inflammasomes	2	34	0.00238245	0.326499	0.36076	0.442782
Telomere Extension By Telomerase	2	34	0.00238245	0.326499	0.36076	0.442782
Pyroptosis	2	34	0.00238245	0.326499	0.36076	0.442782
HSF1-dependent transactivation	3	59	0.00413426	0.331438	0.36076	0.442782
RHOJ GTPase cycle	3	59	0.00413426	0.331438	0.36076	0.442782
SARS-CoV Infections	9	217	0.0152057	0.332801	0.36076	0.442782
ER to Golgi Anterograde Transport	7	164	0.0114918	0.336152	0.36076	0.442782
RAC1 GTPase cycle	8	191	0.0133838	0.337288	0.36076	0.442782
Activation of RAC1 downstream of NMDARs	1	12	0.000840866	0.338363	0.36076	0.442782
IRAK2 mediated activation of TAK1 complex	1	12	0.000840866	0.338363	0.36076	0.442782
VLDLR internalisation and degradation	1	12	0.000840866	0.338363	0.36076	0.442782
Caspase-mediated cleavage of cytoskeletal proteins	1	12	0.000840866	0.338363	0.36076	0.442782
Late endosomal microautophagy	2	35	0.00245253	0.338977	0.36076	0.442782
Uptake and actions of bacterial toxins	3	60	0.00420433	0.340765	0.36076	0.442782
E3 ubiquitin ligases ubiquitinate target proteins	3	61	0.0042744	0.350083	0.36076	0.442782
RHOBTB GTPase Cycle	2	36	0.0025226	0.351383	0.36076	0.442782
NOTCH3 Intracellular Domain Regulates Transcription	2	36	0.0025226	0.351383	0.36076	0.442782
Signaling by Nuclear Receptors	15	387	0.0271179	0.35637	0.36076	0.442782
Platelet degranulation	6	141	0.00988018	0.357812	0.36076	0.442782
Binding and entry of HIV virion	1	13	0.000910938	0.36076	0.36076	0.442782
Activation of Ca-permeable Kainate Receptor	1	13	0.000910938	0.36076	0.36076	0.442782
TICAM1,TRAF6-dependent induction of TAK1 complex	1	13	0.000910938	0.36076	0.36076	0.442782
Formation of apoptosome	1	13	0.000910938	0.36076	0.36076	0.442782
CaMK IV-mediated phosphorylation of CREB	1	13	0.000910938	0.36076	0.36076	0.442782
Regulation of the apoptosome activity	1	13	0.000910938	0.36076	0.36076	0.442782
Receptor Mediated Mitophagy	1	13	0.000910938	0.36076	0.36076	0.442782
MAPK3 (ERK1) activation	1	13	0.000910938	0.36076	0.36076	0.442782
Budding and maturation of HIV virion	2	37	0.00259267	0.363708	0.363708	0.439247
Ionotropic activity of kainate receptors	1	14	0.00098101	0.382399	0.382399	0.417483
vRNP Assembly	1	14	0.00098101	0.382399	0.382399	0.417483
Alpha-protein kinase 1 signaling pathway	1	14	0.00098101	0.382399	0.382399	0.417483
TICAM1-dependent activation of IRF3/IRF7	1	14	0.00098101	0.382399	0.382399	0.417483
InlA-mediated entry of Listeria monocytogenes into host cells	1	14	0.00098101	0.382399	0.382399	0.417483
Tat-mediated HIV elongation arrest and recovery	2	39	0.00273281	0.388081	0.388081	0.411078
Pausing and recovery of Tat-mediated HIV elongation	2	39	0.00273281	0.388081	0.388081	0.411078
TAK1 activates NFkB by phosphorylation and activation of IKKs complex	2	39	0.00273281	0.388081	0.388081	0.411078
Regulation of TP53 Activity through Acetylation	2	39	0.00273281	0.388081	0.388081	0.411078
RAC2 GTPase cycle	4	92	0.00644664	0.389866	0.389866	0.409084
Triglyceride metabolism	3	66	0.00462476	0.396359	0.396359	0.401911
HIV elongation arrest and recovery	2	40	0.00280289	0.400113	0.400113	0.397818
Pausing and recovery of HIV elongation	2	40	0.00280289	0.400113	0.400113	0.397818
DNA Damage Recognition in GG-NER	2	40	0.00280289	0.400113	0.400113	0.397818
Association of TriC/CCT with target proteins during biosynthesis	2	40	0.00280289	0.400113	0.400113	0.397818
Response to elevated platelet cytosolic Ca2+	6	148	0.0103707	0.400261	0.400261	0.397656
Synthesis of diphthamide-EEF2	1	15	0.00105108	0.403307	0.403307	0.394364
Cytochrome c-mediated apoptotic response	1	15	0.00105108	0.403307	0.403307	0.394364
Sensing of DNA Double Strand Breaks	1	15	0.00105108	0.403307	0.403307	0.394364
Reduction of cytosolic Ca++ levels	1	15	0.00105108	0.403307	0.403307	0.394364
Sodium/Calcium exchangers	1	15	0.00105108	0.403307	0.403307	0.394364
NF-kB is activated and signals survival	1	15	0.00105108	0.403307	0.403307	0.394364
Neurotransmitter receptors and postsynaptic signal transmission	9	232	0.0162567	0.404925	0.404925	0.392625
Transcriptional regulation by RUNX1	10	261	0.0182888	0.409904	0.409904	0.387317
Nuclear import of Rev protein	2	41	0.00287296	0.412032	0.412032	0.385069
Regulation of TNFR1 signaling	2	41	0.00287296	0.412032	0.412032	0.385069
RAF activation	2	41	0.00287296	0.412032	0.412032	0.385069
Signaling by ERBB2	3	68	0.00476491	0.41464	0.41464	0.382329
Metabolism of cofactors	3	68	0.00476491	0.41464	0.41464	0.382329
RHO GTPase cycle	17	460	0.0322332	0.416536	0.416536	0.380348
Scavenging by Class F Receptors	1	16	0.00112115	0.423509	0.423509	0.373137
Downregulation of ERBB2:ERBB3 signaling	1	16	0.00112115	0.423509	0.423509	0.373137
Constitutive Signaling by Overexpressed ERBB2	1	16	0.00112115	0.423509	0.423509	0.373137
Advanced glycosylation endproduct receptor signaling	1	16	0.00112115	0.423509	0.423509	0.373137
Constitutive Signaling by NOTCH1 HD Domain Mutants	1	16	0.00112115	0.423509	0.423509	0.373137
Signaling by NOTCH1 HD Domain Mutants in Cancer	1	16	0.00112115	0.423509	0.423509	0.373137
SUMOylation of DNA methylation proteins	1	16	0.00112115	0.423509	0.423509	0.373137
IRAK1 recruits IKK complex	1	16	0.00112115	0.423509	0.423509	0.373137
IRAK1 recruits IKK complex upon TLR7/8 or 9 stimulation	1	16	0.00112115	0.423509	0.423509	0.373137
Pervasive developmental disorders	1	16	0.00112115	0.423509	0.423509	0.373137
Disorders of Developmental Biology	1	16	0.00112115	0.423509	0.423509	0.373137
Disorders of Nervous System Development	1	16	0.00112115	0.423509	0.423509	0.373137
Loss of function of MECP2 in Rett syndrome	1	16	0.00112115	0.423509	0.423509	0.373137
Attachment and Entry	1	16	0.00112115	0.423509	0.423509	0.373137
p75NTR recruits signalling complexes	1	16	0.00112115	0.423509	0.423509	0.373137
Regulation of FOXO transcriptional activity by acetylation	1	16	0.00112115	0.423509	0.423509	0.373137
Plasma lipoprotein clearance	2	42	0.00294303	0.423834	0.423834	0.372804
p53-Dependent G1/S DNA damage checkpoint	3	70	0.00490505	0.432741	0.432741	0.363772
p53-Dependent G1 DNA Damage Response	3	70	0.00490505	0.432741	0.432741	0.363772
Signal Transduction	105	2997	0.210006	0.434828	0.434828	0.361683
CaM pathway	2	43	0.0030131	0.435511	0.435511	0.361
Calmodulin induced events	2	43	0.0030131	0.435511	0.435511	0.361
Glycogen metabolism	2	43	0.0030131	0.435511	0.435511	0.361
Nucleotide-binding domain, leucine rich repeat containing receptor (NLR) signaling pathways	3	71	0.00497512	0.441715	0.441715	0.354858
Membrane binding and targetting of GAG proteins	1	17	0.00119123	0.443028	0.443028	0.353568
TRAF6 mediated IRF7 activation in TLR7/8 or 9 signaling	1	17	0.00119123	0.443028	0.443028	0.353568
Vpr-mediated nuclear import of PICs	2	44	0.00308318	0.44706	0.44706	0.349634
RND2 GTPase cycle	2	44	0.00308318	0.44706	0.44706	0.349634
VEGFR2 mediated vascular permeability	2	44	0.00308318	0.44706	0.44706	0.349634
Deactivation of the beta-catenin transactivating complex	2	44	0.00308318	0.44706	0.44706	0.349634
RAC3 GTPase cycle	4	100	0.00700722	0.450821	0.450821	0.345995
IRAK2 mediated activation of TAK1 complex upon TLR7/8 or 9 stimulation	1	18	0.0012613	0.461888	0.461888	0.335463
CLEC7A (Dectin-1) induces NFAT activation	1	18	0.0012613	0.461888	0.461888	0.335463
Synthesis And Processing Of GAG, GAGPOL Polyproteins	1	18	0.0012613	0.461888	0.461888	0.335463
Hyaluronan uptake and degradation	1	18	0.0012613	0.461888	0.461888	0.335463
MAP3K8 (TPL2)-dependent MAPK1/3 activation	1	18	0.0012613	0.461888	0.461888	0.335463
Regulation of BACH1 activity	1	18	0.0012613	0.461888	0.461888	0.335463
Post-translational protein modification	56	1598	0.111975	0.463012	0.463012	0.334408
TCF dependent signaling in response to WNT	8	216	0.0151356	0.4658	0.4658	0.331801
CDC42 GTPase cycle	6	159	0.0111415	0.466465	0.466465	0.331181
TRAF6-mediated induction of TAK1 complex within TLR4 complex	1	19	0.00133137	0.48011	0.48011	0.318659
Activation of BAD and translocation to mitochondria	1	19	0.00133137	0.48011	0.48011	0.318659
InlB-mediated entry of Listeria monocytogenes into host cell	1	19	0.00133137	0.48011	0.48011	0.318659
TGF-beta receptor signaling in EMT (epithelial to mesenchymal transition)	1	19	0.00133137	0.48011	0.48011	0.318659
Sema3A PAK dependent Axon repulsion	1	19	0.00133137	0.48011	0.48011	0.318659
TICAM1, RIP1-mediated IKK complex recruitment	1	19	0.00133137	0.48011	0.48011	0.318659
Protein repair	1	19	0.00133137	0.48011	0.48011	0.318659
Tristetraprolin (TTP, ZFP36) binds and destabilizes mRNA	1	19	0.00133137	0.48011	0.48011	0.318659
Spry regulation of FGF signaling	1	19	0.00133137	0.48011	0.48011	0.318659
Butyrate Response Factor 1 (BRF1) binds and destabilizes mRNA	1	19	0.00133137	0.48011	0.48011	0.318659
p75NTR signals via NF-kB	1	19	0.00133137	0.48011	0.48011	0.318659
Interactions of Vpr with host cellular proteins	2	47	0.00329339	0.480888	0.480888	0.317956
Nuclear signaling by ERBB4	2	47	0.00329339	0.480888	0.480888	0.317956
Ca-dependent events	2	48	0.00336346	0.491878	0.491878	0.308142
SUMOylation of transcription factors	1	20	0.00140144	0.497717	0.497717	0.303018
Activation of IRF3/IRF7 mediated by TBK1/IKK epsilon	1	20	0.00140144	0.497717	0.497717	0.303018
Attachment and Entry	1	20	0.00140144	0.497717	0.497717	0.303018
KSRP (KHSRP) binds and destabilizes mRNA	1	20	0.00140144	0.497717	0.497717	0.303018
Negative regulation of FLT3	1	20	0.00140144	0.497717	0.497717	0.303018
Hemostasis	28	803	0.056268	0.498356	0.498356	0.302461
Formation of HIV-1 elongation complex containing HIV-1 Tat	2	49	0.00343354	0.502721	0.502721	0.298673
RHOG GTPase cycle	3	78	0.00546563	0.502816	0.502816	0.298591
Formation of HIV elongation complex in the absence of HIV Tat	2	50	0.00350361	0.513413	0.513413	0.289533
Regulation of innate immune responses to cytosolic DNA	1	21	0.00147152	0.514728	0.514728	0.288422
GDP-fucose biosynthesis	1	21	0.00147152	0.514728	0.514728	0.288422
TFAP2 (AP-2) family regulates transcription of growth factors and their receptors	1	21	0.00147152	0.514728	0.514728	0.288422
Metabolism of nucleotides	9	256	0.0179385	0.519749	0.519749	0.284206
TNF signaling	2	51	0.00357368	0.523953	0.523953	0.280708
Response of Mtb to phagocytosis	2	51	0.00357368	0.523953	0.523953	0.280708
Glycolysis	4	110	0.00770794	0.523982	0.523982	0.280683
Membrane Trafficking	23	667	0.0467381	0.525347	0.525347	0.279554
Cell death signalling via NRAGE, NRIF and NADE	3	81	0.00567585	0.527939	0.527939	0.277416
Constitutive Signaling by EGFRvIII	1	22	0.00154159	0.531165	0.531165	0.274771
Signaling by EGFRvIII in Cancer	1	22	0.00154159	0.531165	0.531165	0.274771
Regulation of FZD by ubiquitination	1	22	0.00154159	0.531165	0.531165	0.274771
Synthesis, secretion, and inactivation of Glucose-dependent Insulinotropic Polypeptide (GIP)	1	22	0.00154159	0.531165	0.531165	0.274771
Glycogen storage diseases	1	22	0.00154159	0.531165	0.531165	0.274771
Vitamin D (calciferol) metabolism	1	22	0.00154159	0.531165	0.531165	0.274771
Uptake and function of anthrax toxins	1	22	0.00154159	0.531165	0.531165	0.274771
Tat-mediated elongation of the HIV-1 transcript	2	52	0.00364375	0.534338	0.534338	0.272184
HIV Transcription Elongation	2	52	0.00364375	0.534338	0.534338	0.272184
Signaling by ERBB4	3	82	0.00574592	0.536156	0.536156	0.270709
PTEN Regulation	6	171	0.0119823	0.536275	0.536275	0.270613
NEP/NS2 Interacts with the Cellular Export Machinery	2	53	0.00371383	0.544566	0.544566	0.263949
DAG and IP3 signaling	2	53	0.00371383	0.544566	0.544566	0.263949
Regulation of HSF1-mediated heat shock response	4	113	0.00791816	0.54502	0.54502	0.263588
RNA Polymerase III Transcription Termination	1	23	0.00161166	0.547045	0.547045	0.261977
PKA activation in glucagon signalling	1	23	0.00161166	0.547045	0.547045	0.261977
Apoptotic factor-mediated response	1	23	0.00161166	0.547045	0.547045	0.261977
Cytosolic iron-sulfur cluster assembly	1	23	0.00161166	0.547045	0.547045	0.261977
Signaling by ERBB2 ECD mutants	1	23	0.00161166	0.547045	0.547045	0.261977
Hyaluronan metabolism	1	23	0.00161166	0.547045	0.547045	0.261977
NOTCH2 Activation and Transmission of Signal to the Nucleus	1	23	0.00161166	0.547045	0.547045	0.261977
Translation of Replicase and Assembly of the Replication Transcription Complex	1	23	0.00161166	0.547045	0.547045	0.261977
Ubiquitin-dependent degradation of Cyclin D	2	54	0.0037839	0.554637	0.554637	0.255991
Export of Viral Ribonucleoproteins from Nucleus	2	54	0.0037839	0.554637	0.554637	0.255991
Cell recruitment (pro-inflammatory response)	2	54	0.0037839	0.554637	0.554637	0.255991
Purinergic signaling in leishmaniasis infection	2	54	0.0037839	0.554637	0.554637	0.255991
mRNA decay by 3' to 5' exoribonuclease	1	24	0.00168173	0.562389	0.562389	0.249963
IKK complex recruitment mediated by RIP1	1	24	0.00168173	0.562389	0.562389	0.249963
Regulation of signaling by CBL	1	24	0.00168173	0.562389	0.562389	0.249963
FBXL7 down-regulates AURKA during mitotic entry and in early mitosis	2	55	0.00385397	0.56455	0.56455	0.248298
Transcriptional regulation by RUNX2	5	147	0.0103006	0.570505	0.570505	0.243741
Formation of TC-NER Pre-Incision Complex	2	56	0.00392404	0.574303	0.574303	0.240859
Regulation of cholesterol biosynthesis by SREBP (SREBF)	3	87	0.00609628	0.575983	0.575983	0.23959
Serine biosynthesis	1	25	0.0017518	0.577214	0.577214	0.238663
Synthesis of Ketone Bodies	1	25	0.0017518	0.577214	0.577214	0.238663
Translation of Replicase and Assembly of the Replication Transcription Complex	1	25	0.0017518	0.577214	0.577214	0.238663
Respiratory electron transport	4	118	0.00826852	0.578979	0.578979	0.237337
Transcriptional activation of mitochondrial biogenesis	3	88	0.00616635	0.583688	0.583688	0.233819
Negative regulation of NOTCH4 signaling	2	57	0.00399411	0.583896	0.583896	0.233664
MyD88 deficiency (TLR2/4)	1	26	0.00182188	0.591538	0.591538	0.228017
JNK (c-Jun kinases) phosphorylation and activation mediated by activated human TAK1	1	26	0.00182188	0.591538	0.591538	0.228017
Glycogen breakdown (glycogenolysis)	1	26	0.00182188	0.591538	0.591538	0.228017
Prevention of phagosomal-lysosomal fusion	1	26	0.00182188	0.591538	0.591538	0.228017
Synthesis, secretion, and deacylation of Ghrelin	1	26	0.00182188	0.591538	0.591538	0.228017
Basigin interactions	1	26	0.00182188	0.591538	0.591538	0.228017
Glycogen synthesis	1	26	0.00182188	0.591538	0.591538	0.228017
Stabilization of p53	2	59	0.00413426	0.602601	0.602601	0.21997
Negative regulation of NMDA receptor-mediated neuronal transmission	1	27	0.00189195	0.605378	0.605378	0.217973
IRAK4 deficiency (TLR2/4)	1	27	0.00189195	0.605378	0.605378	0.217973
Abortive elongation of HIV-1 transcript in the absence of Tat	1	27	0.00189195	0.605378	0.605378	0.217973
Ras activation upon Ca2+ influx through NMDA receptor	1	27	0.00189195	0.605378	0.605378	0.217973
Listeria monocytogenes entry into host cells	1	27	0.00189195	0.605378	0.605378	0.217973
activated TAK1 mediates p38 MAPK activation	1	27	0.00189195	0.605378	0.605378	0.217973
Unblocking of NMDA receptors, glutamate binding and activation	1	27	0.00189195	0.605378	0.605378	0.217973
RHO GTPases activate PAKs	1	27	0.00189195	0.605378	0.605378	0.217973
Inactivation of CSF3 (G-CSF) signaling	1	27	0.00189195	0.605378	0.605378	0.217973
Mitochondrial calcium ion transport	1	27	0.00189195	0.605378	0.605378	0.217973
Downstream signaling events of B Cell Receptor (BCR)	3	91	0.00637657	0.606262	0.606262	0.21734
Unfolded Protein Response (UPR)	5	155	0.0108612	0.617035	0.617035	0.20969
FGFR2 alternative splicing	1	28	0.00196202	0.618749	0.618749	0.208485
RAF-independent MAPK1/3 activation	1	28	0.00196202	0.618749	0.618749	0.208485
LDL clearance	1	28	0.00196202	0.618749	0.618749	0.208485
Signaling by EGFR	2	61	0.0042744	0.620664	0.620664	0.207143
SARS-CoV-1 Infection	3	93	0.00651671	0.620854	0.620854	0.207011
Transport to the Golgi and subsequent modification	7	219	0.0153458	0.628198	0.628198	0.201903
TP53 Regulates Metabolic Genes	4	126	0.00882909	0.630174	0.630174	0.200539
Estrogen-dependent nuclear events downstream of ESR-membrane signaling	1	29	0.00203209	0.631669	0.631669	0.199511
Formation of RNA Pol II elongation complex	2	63	0.00441455	0.638088	0.638088	0.195119
RHOQ GTPase cycle	2	63	0.00441455	0.638088	0.638088	0.195119
Signaling by ERBB2 TMD/JMD mutants	1	30	0.00210217	0.644151	0.644151	0.191012
TRP channels	1	30	0.00210217	0.644151	0.644151	0.191012
TRAF6 mediated NF-kB activation	1	30	0.00210217	0.644151	0.644151	0.191012
Ion homeostasis	2	64	0.00448462	0.646562	0.646562	0.18939
Sensory processing of sound by outer hair cells of the cochlea	2	64	0.00448462	0.646562	0.646562	0.18939
Long-term potentiation	1	31	0.00217224	0.656212	0.656212	0.182956
MicroRNA (miRNA) biogenesis	1	31	0.00217224	0.656212	0.656212	0.182956
VEGFR2 mediated cell proliferation	1	31	0.00217224	0.656212	0.656212	0.182956
PIWI-interacting RNA (piRNA) biogenesis	1	31	0.00217224	0.656212	0.656212	0.182956
Interleukin-7 signaling	1	31	0.00217224	0.656212	0.656212	0.182956
RNA Polymerase II Transcription Elongation	2	66	0.00462476	0.663037	0.663037	0.178462
Activated NOTCH1 Transmits Signal to the Nucleus	1	32	0.00224231	0.667864	0.667864	0.175312
DDX58/IFIH1-mediated induction of interferon-alpha/beta	3	100	0.00700722	0.668976	0.668976	0.174589
Transcriptional Regulation by MECP2	3	100	0.00700722	0.668976	0.668976	0.174589
PLC beta mediated events	2	67	0.00469484	0.671041	0.671041	0.173251
RNA Polymerase I Transcription Termination	1	33	0.00231238	0.679122	0.679122	0.168052
Downregulation of SMAD2/3:SMAD4 transcriptional activity	1	33	0.00231238	0.679122	0.679122	0.168052
ER Quality Control Compartment (ERQC)	1	33	0.00231238	0.679122	0.679122	0.168052
Detoxification of Reactive Oxygen Species	2	69	0.00483498	0.686585	0.686585	0.163305
Phase 0 - rapid depolarisation	1	34	0.00238245	0.689999	0.689999	0.161151
Activation of kainate receptors upon glutamate binding	1	34	0.00238245	0.689999	0.689999	0.161151
Negative regulation of FGFR3 signaling	1	34	0.00238245	0.689999	0.689999	0.161151
ATF4 activates genes in response to endoplasmic reticulum stress	1	34	0.00238245	0.689999	0.689999	0.161151
Pyrimidine salvage	1	34	0.00238245	0.689999	0.689999	0.161151
Endosomal Sorting Complex Required For Transport (ESCRT)	1	35	0.00245253	0.700509	0.700509	0.154587
Signaling by ERBB2 KD Mutants	1	35	0.00245253	0.700509	0.700509	0.154587
Negative regulation of FGFR4 signaling	1	35	0.00245253	0.700509	0.700509	0.154587
Platelet calcium homeostasis	1	35	0.00245253	0.700509	0.700509	0.154587
Signaling by CSF3 (G-CSF)	1	35	0.00245253	0.700509	0.700509	0.154587
Circadian Clock	3	105	0.00735758	0.700521	0.700521	0.154579
Ion transport by P-type ATPases	2	71	0.00497512	0.701522	0.701522	0.153958
Signaling by Non-Receptor Tyrosine Kinases	2	71	0.00497512	0.701522	0.701522	0.153958
Signaling by PTK6	2	71	0.00497512	0.701522	0.701522	0.153958
Signaling by WNT	10	332	0.023264	0.706391	0.706391	0.150955
MAPK6/MAPK4 signaling	3	106	0.00742765	0.706548	0.706548	0.150858
Glucose metabolism	4	140	0.0098101	0.709654	0.709654	0.148953
Signaling by ERBB2 in Cancer	1	36	0.0025226	0.710662	0.710662	0.148337
Regulation of TLR by endogenous ligand	1	36	0.0025226	0.710662	0.710662	0.148337
G-protein mediated events	2	73	0.00511527	0.715864	0.715864	0.14517
Formation of the HIV-1 Early Elongation Complex	1	37	0.00259267	0.720472	0.720472	0.142383
Formation of the Early Elongation Complex	1	37	0.00259267	0.720472	0.720472	0.142383
Negative regulators of DDX58/IFIH1 signaling	1	37	0.00259267	0.720472	0.720472	0.142383
EGFR downregulation	1	37	0.00259267	0.720472	0.720472	0.142383
Regulation of PTEN stability and activity	2	74	0.00518534	0.722815	0.722815	0.140973
Cholesterol biosynthesis	2	74	0.00518534	0.722815	0.722815	0.140973
p75 NTR receptor-mediated signalling	3	110	0.00770794	0.729729	0.729729	0.136838
Molecules associated with elastic fibres	1	38	0.00266274	0.729951	0.729951	0.136707
RHOH GTPase cycle	1	38	0.00266274	0.729951	0.729951	0.136707
Signaling by NOTCH2	1	38	0.00266274	0.729951	0.729951	0.136707
Extra-nuclear estrogen signaling	3	111	0.00777801	0.735295	0.735295	0.133538
Sensory processing of sound by inner hair cells of the cochlea	2	76	0.00532549	0.736287	0.736287	0.132953
Transport of the SLBP independent Mature mRNA	1	39	0.00273281	0.739108	0.739108	0.131292
CREB1 phosphorylation through NMDA receptor-mediated activation of RAS signaling	1	39	0.00273281	0.739108	0.739108	0.131292
Negative regulation of FGFR1 signaling	1	39	0.00273281	0.739108	0.739108	0.131292
SUMOylation of SUMOylation proteins	1	39	0.00273281	0.739108	0.739108	0.131292
RUNX1 interacts with co-factors whose precise effect on RUNX1 targets is not known	1	39	0.00273281	0.739108	0.739108	0.131292
Synthesis of IP3 and IP4 in the cytosol	1	39	0.00273281	0.739108	0.739108	0.131292
SARS-CoV-2 Infection	3	112	0.00784808	0.74077	0.74077	0.130317
Opioid Signalling	3	113	0.00791816	0.746155	0.746155	0.127171
Transport of the SLBP Dependant Mature mRNA	1	40	0.00280289	0.747956	0.747956	0.126124
NOD1/2 Signaling Pathway	1	40	0.00280289	0.747956	0.747956	0.126124
SUMOylation of intracellular receptors	1	40	0.00280289	0.747956	0.747956	0.126124
Glucagon signaling in metabolic regulation	1	40	0.00280289	0.747956	0.747956	0.126124
Negative regulation of FGFR2 signaling	1	41	0.00287296	0.756504	0.756504	0.121189
Calnexin/calreticulin cycle	1	41	0.00287296	0.756504	0.756504	0.121189
Diseases of Immune System	1	42	0.00294303	0.764762	0.764762	0.116474
Diseases associated with the TLR signaling cascade	1	42	0.00294303	0.764762	0.764762	0.116474
PERK regulates gene expression	1	42	0.00294303	0.764762	0.764762	0.116474
Transcription of the HIV genome	2	81	0.00567585	0.767544	0.767544	0.114897
Neutrophil degranulation	14	480	0.0336346	0.769745	0.769745	0.113653
Respiratory electron transport, ATP synthesis by chemiosmotic coupling, and heat production by uncoupling proteins.	4	153	0.010721	0.771635	0.771635	0.112588
Signaling by ALK	1	43	0.0030131	0.772742	0.772742	0.111966
RND1 GTPase cycle	1	43	0.0030131	0.772742	0.772742	0.111966
RND3 GTPase cycle	1	43	0.0030131	0.772742	0.772742	0.111966
FLT3 signaling in disease	1	43	0.0030131	0.772742	0.772742	0.111966
Vesicle-mediated transport	25	827	0.0579497	0.773923	0.773923	0.111302
Stimuli-sensing channels	3	119	0.00833859	0.776607	0.776607	0.109798
Regulation of RUNX2 expression and activity	2	83	0.00581599	0.779118	0.779118	0.108397
ISG15 antiviral mechanism	2	83	0.00581599	0.779118	0.779118	0.108397
TP53 Regulates Transcription of Cell Death Genes	2	83	0.00581599	0.779118	0.779118	0.108397
Synthesis, secretion, and inactivation of Glucagon-like Peptide-1 (GLP-1)	1	44	0.00308318	0.780451	0.780451	0.107655
CLEC7A (Dectin-1) signaling	3	120	0.00840866	0.78138	0.78138	0.107137
Transport of Mature mRNA Derived from an Intronless Transcript	1	46	0.00322332	0.795094	0.795094	0.0995813
NS1 Mediated Effects on Host Pathways	1	46	0.00322332	0.795094	0.795094	0.0995813
Elastic fibre formation	1	46	0.00322332	0.795094	0.795094	0.0995813
RNA Polymerase III Abortive And Retractive Initiation	1	46	0.00322332	0.795094	0.795094	0.0995813
RNA Polymerase III Transcription	1	46	0.00322332	0.795094	0.795094	0.0995813
Death Receptor Signalling	4	159	0.0111415	0.796519	0.796519	0.0988039
Sensory processing of sound	2	87	0.00609628	0.800758	0.800758	0.0964986
Transport of Mature mRNAs Derived from Intronless Transcripts	1	47	0.00329339	0.802047	0.802047	0.0958003
Metabolism of folate and pterines	1	47	0.00329339	0.802047	0.802047	0.0958003
RNA Polymerase II Pre-transcription Events	2	88	0.00616635	0.805866	0.805866	0.093737
Signaling by FGFR2	2	88	0.00616635	0.805866	0.805866	0.093737
Signaling by MET	2	88	0.00616635	0.805866	0.805866	0.093737
Transport of Ribonucleoproteins into the Host Nucleus	1	48	0.00336346	0.808764	0.808764	0.0921784
Incretin synthesis, secretion, and inactivation	1	48	0.00336346	0.808764	0.808764	0.0921784
FLT3 Signaling	1	48	0.00336346	0.808764	0.808764	0.0921784
Smooth Muscle Contraction	1	49	0.00343354	0.815253	0.815253	0.0887077
Scavenging by Class A Receptors	1	49	0.00343354	0.815253	0.815253	0.0887077
Signaling by RAF1 mutants	1	49	0.00343354	0.815253	0.815253	0.0887077
Negative regulation of MAPK pathway	1	49	0.00343354	0.815253	0.815253	0.0887077
Translation of Structural Proteins	1	49	0.00343354	0.815253	0.815253	0.0887077
Mitochondrial biogenesis	3	128	0.00896924	0.816603	0.816603	0.0879892
Regulation of activated PAK-2p34 by proteasome mediated degradation	1	50	0.00350361	0.821522	0.821522	0.0853806
Glucagon-like Peptide-1 (GLP1) regulates insulin secretion	1	50	0.00350361	0.821522	0.821522	0.0853806
Cytosolic tRNA aminoacylation	1	50	0.00350361	0.821522	0.821522	0.0853806
Interleukin-3, Interleukin-5 and GM-CSF signaling	1	50	0.00350361	0.821522	0.821522	0.0853806
Signaling by NOTCH4	2	92	0.00644664	0.825152	0.825152	0.0834659
SUMOylation of RNA binding proteins	1	51	0.00357368	0.82758	0.82758	0.0821902
Signaling by FGFR4	1	51	0.00357368	0.82758	0.82758	0.0821902
TBC/RABGAPs	1	51	0.00357368	0.82758	0.82758	0.0821902
Signaling by SCF-KIT	1	51	0.00357368	0.82758	0.82758	0.0821902
Oncogenic MAPK signaling	2	93	0.00651671	0.829697	0.829697	0.0810804
Mitochondrial translation termination	2	94	0.00658678	0.834136	0.834136	0.0787634
Mitochondrial translation elongation	2	94	0.00658678	0.834136	0.834136	0.0787634
MyD88 cascade initiated on plasma membrane	2	94	0.00658678	0.834136	0.834136	0.0787634
Toll Like Receptor 5 (TLR5) Cascade	2	94	0.00658678	0.834136	0.834136	0.0787634
Toll Like Receptor 10 (TLR10) Cascade	2	94	0.00658678	0.834136	0.834136	0.0787634
Antiviral mechanism by IFN-stimulated genes	2	94	0.00658678	0.834136	0.834136	0.0787634
Transmission across Chemical Synapses	9	343	0.0240348	0.834725	0.834725	0.0784565
XBP1(S) activates chaperone genes	2	95	0.00665686	0.838469	0.838469	0.0765129
Vpu mediated degradation of CD4	1	53	0.00371383	0.839086	0.839086	0.0761937
Vasopressin regulates renal water homeostasis via Aquaporins	1	53	0.00371383	0.839086	0.839086	0.0761937
Signaling by FGFR3	1	53	0.00371383	0.839086	0.839086	0.0761937
Mitochondrial translation initiation	2	96	0.00672693	0.8427	0.8427	0.0743269
Signaling by Interleukins	18	643	0.0450564	0.843229	0.843229	0.0740543
Regulation of Apoptosis	1	54	0.0037839	0.844548	0.844548	0.0733757
Autodegradation of the E3 ubiquitin ligase COP1	1	54	0.0037839	0.844548	0.844548	0.0733757
Inactivation, recovery and regulation of the phototransduction cascade	1	54	0.0037839	0.844548	0.844548	0.0733757
Signaling downstream of RAS mutants	1	54	0.0037839	0.844548	0.844548	0.0733757
Signaling by moderate kinase activity BRAF mutants	1	54	0.0037839	0.844548	0.844548	0.0733757
Paradoxical activation of RAF signaling by kinase inactive BRAF	1	54	0.0037839	0.844548	0.844548	0.0733757
Signaling by RAS mutants	1	54	0.0037839	0.844548	0.844548	0.0733757
Plasma lipoprotein assembly, remodeling, and clearance	2	98	0.00686707	0.850862	0.850862	0.0701407
Interleukin-4 and Interleukin-13 signaling	5	211	0.0147852	0.851368	0.851368	0.0698828
HCMV Late Events	4	175	0.0122626	0.852298	0.852298	0.0694087
Signaling by VEGF	3	138	0.00966996	0.853752	0.853752	0.068668
PCP/CE pathway	2	99	0.00693715	0.854797	0.854797	0.0681369
Vif-mediated degradation of APOBEC3G	1	56	0.00392404	0.854924	0.854924	0.0680727
Degradation of DVL	1	57	0.00399411	0.859849	0.859849	0.0655777
Degradation of AXIN	1	57	0.00399411	0.859849	0.859849	0.0655777
Regulation of RUNX3 expression and activity	1	57	0.00399411	0.859849	0.859849	0.0655777
N-glycan trimming in the ER and Calnexin/Calreticulin cycle	1	57	0.00399411	0.859849	0.859849	0.0655777
NOTCH1 Intracellular Domain Regulates Transcription	1	57	0.00399411	0.859849	0.859849	0.0655777
TRAF6 mediated induction of NFkB and MAP kinases upon TLR7/8 or 9 activation	2	101	0.00707729	0.862384	0.862384	0.0642992
IRE1alpha activates chaperones	2	101	0.00707729	0.862384	0.862384	0.0642992
Branched-chain amino acid catabolism	1	58	0.00406419	0.864608	0.864608	0.0631807
Synthesis of Prostaglandins (PG) and Thromboxanes (TX)	1	58	0.00406419	0.864608	0.864608	0.0631807
Mitochondrial translation	2	102	0.00714736	0.86604	0.86604	0.062462
Toll Like Receptor 3 (TLR3) Cascade	2	102	0.00714736	0.86604	0.86604	0.062462
MyD88 dependent cascade initiated on endosome	2	102	0.00714736	0.86604	0.86604	0.062462
Complex I biogenesis	1	59	0.00413426	0.869206	0.869206	0.0608775
The phototransduction cascade	1	59	0.00413426	0.869206	0.869206	0.0608775
Toll Like Receptor 7/8 (TLR7/8) Cascade	2	103	0.00721743	0.869607	0.869607	0.060677
ROS sensing by NFE2L2	1	60	0.00420433	0.873647	0.873647	0.0586639
Hh mutants are degraded by ERAD	1	61	0.0042744	0.877938	0.877938	0.0565359
NIK-->noncanonical NF-kB signaling	1	61	0.0042744	0.877938	0.877938	0.0565359
Toll Like Receptor 9 (TLR9) Cascade	2	106	0.00742765	0.87979	0.87979	0.0556209
GLI3 is processed to GLI3R by the proteasome	1	62	0.00434447	0.882084	0.882084	0.05449
Degradation of GLI2 by the proteasome	1	62	0.00434447	0.882084	0.882084	0.05449
Degradation of GLI1 by the proteasome	1	62	0.00434447	0.882084	0.882084	0.05449
Signaling by FGFR1	1	62	0.00434447	0.882084	0.882084	0.05449
TRIF(TICAM1)-mediated TLR4 signaling	2	107	0.00749772	0.883018	0.883018	0.0540304
MyD88-independent TLR4 cascade	2	107	0.00749772	0.883018	0.883018	0.0540304
Signaling by FGFR	2	107	0.00749772	0.883018	0.883018	0.0540304
Intracellular signaling by second messengers	9	366	0.0256464	0.883249	0.883249	0.0539166
Toll-like Receptor Cascades	4	188	0.0131736	0.887549	0.887549	0.0518079
Post-translational protein phosphorylation	2	109	0.00763787	0.889235	0.889235	0.0509834
Interleukin-1 signaling	2	109	0.00763787	0.889235	0.889235	0.0509834
Hh mutants abrogate ligand secretion	1	64	0.00448462	0.889959	0.889959	0.0506301
NRAGE signals death through JNK	1	64	0.00448462	0.889959	0.889959	0.0506301
Defective CFTR causes cystic fibrosis	1	66	0.00462476	0.897309	0.897309	0.0470582
Dectin-1 mediated noncanonical NF-kB signaling	1	66	0.00462476	0.897309	0.897309	0.0470582
Asymmetric localization of PCP proteins	1	66	0.00462476	0.897309	0.897309	0.0470582
Peroxisomal protein import	1	67	0.00469484	0.900798	0.900798	0.0453728
Assembly of collagen fibrils and other multimeric structures	1	67	0.00469484	0.900798	0.900798	0.0453728
Signaling by NOTCH1 in Cancer	1	68	0.00476491	0.904168	0.904168	0.0437507
Constitutive Signaling by NOTCH1 PEST Domain Mutants	1	68	0.00476491	0.904168	0.904168	0.0437507
Signaling by NOTCH1 PEST Domain Mutants in Cancer	1	68	0.00476491	0.904168	0.904168	0.0437507
Signaling by NOTCH1 HD+PEST Domain Mutants in Cancer	1	68	0.00476491	0.904168	0.904168	0.0437507
Constitutive Signaling by NOTCH1 HD+PEST Domain Mutants	1	68	0.00476491	0.904168	0.904168	0.0437507
tRNA Aminoacylation	1	68	0.00476491	0.904168	0.904168	0.0437507
Synthesis of PIPs at the plasma membrane	1	69	0.00483498	0.907425	0.907425	0.0421894
MAP kinase activation	1	69	0.00483498	0.907425	0.907425	0.0421894
Aquaporin-mediated transport	1	69	0.00483498	0.907425	0.907425	0.0421894
Mitochondrial protein import	1	69	0.00483498	0.907425	0.907425	0.0421894
Collagen degradation	1	69	0.00483498	0.907425	0.907425	0.0421894
Nucleotide salvage	1	69	0.00483498	0.907425	0.907425	0.0421894
Cytoprotection by HMOX1	3	158	0.0110714	0.908816	0.908816	0.041524
tRNA processing in the nucleus	1	70	0.00490505	0.910571	0.910571	0.0406863
Heme signaling	1	70	0.00490505	0.910571	0.910571	0.0406863
MyD88:MAL(TIRAP) cascade initiated on plasma membrane	2	118	0.00826852	0.913596	0.913596	0.039246
Toll Like Receptor TLR6:TLR2 Cascade	2	118	0.00826852	0.913596	0.913596	0.039246
Regulation of RAS by GAPs	1	71	0.00497512	0.91361	0.91361	0.0392392
Semaphorin interactions	1	71	0.00497512	0.91361	0.91361	0.0392392
Activation of gene expression by SREBF (SREBP)	1	71	0.00497512	0.91361	0.91361	0.0392392
Oxygen-dependent proline hydroxylation of Hypoxia-inducible Factor Alpha	1	72	0.0050452	0.916546	0.916546	0.0378457
Hedgehog ligand biogenesis	1	72	0.0050452	0.916546	0.916546	0.0378457
Activation of NF-kappaB in B cells	1	72	0.0050452	0.916546	0.916546	0.0378457
Antigen processing: Ubiquitination & Proteasome degradation	7	315	0.0220727	0.916834	0.916834	0.0377091
Signaling by BRAF and RAF1 fusions	1	73	0.00511527	0.919383	0.919383	0.0365036
Signaling by Retinoic Acid	1	73	0.00511527	0.919383	0.919383	0.0365036
Translation of Structural Proteins	1	73	0.00511527	0.919383	0.919383	0.0365036
Toll Like Receptor TLR1:TLR2 Cascade	2	121	0.00847873	0.920532	0.920532	0.0359609
Toll Like Receptor 2 (TLR2) Cascade	2	121	0.00847873	0.920532	0.920532	0.0359609
Gamma carboxylation, hypusine formation and arylsulfatase activation	1	74	0.00518534	0.922123	0.922123	0.0352111
PIP3 activates AKT signaling	7	319	0.022353	0.922684	0.922684	0.0349471
Ion channel transport	4	206	0.0144349	0.924149	0.924149	0.034258
Regulation of HMOX1 expression and activity	1	75	0.00525541	0.924771	0.924771	0.033966
Beta-catenin independent WNT signaling	3	166	0.011632	0.925005	0.925005	0.0338561
Adaptive Immune System	27	1005	0.0704225	0.927196	0.927196	0.0328284
Interleukin-17 signaling	1	77	0.00539556	0.929799	0.929799	0.031611
Cytosolic sensors of pathogen-associated DNA	1	78	0.00546563	0.932186	0.932186	0.0304975
VEGFA-VEGFR2 Pathway	2	127	0.00889917	0.932864	0.932864	0.0301816
Regulation of Insulin-like Growth Factor (IGF) transport and uptake by Insulin-like Growth Factor Binding Proteins (IGFBPs)	2	127	0.00889917	0.932864	0.932864	0.0301816
Cellular response to chemical stress	4	212	0.0148553	0.933732	0.933732	0.0297779
Purine catabolism	1	80	0.00560577	0.93672	0.93672	0.0283904
Platelet activation, signaling and aggregation	6	293	0.0205311	0.937806	0.937806	0.0278868
Ca2+ pathway	1	81	0.00567585	0.938872	0.938872	0.0273938
Diseases of carbohydrate metabolism	1	81	0.00567585	0.938872	0.938872	0.0273938
Endosomal/Vacuolar pathway	1	82	0.00574592	0.940951	0.940951	0.0264331
Iron uptake and transport	1	83	0.00581599	0.942959	0.942959	0.0255071
Signaling by NOTCH1	1	84	0.00588606	0.944899	0.944899	0.0246144
Infection with Mycobacterium tuberculosis	2	135	0.00945974	0.946512	0.946512	0.023874
NR1H2 and NR1H3-mediated signaling	1	85	0.00595613	0.946774	0.946774	0.0237537
Cellular response to hypoxia	1	86	0.00602621	0.948585	0.948585	0.0229239
G alpha (12/13) signalling events	1	86	0.00602621	0.948585	0.948585	0.0229239
Glycosphingolipid metabolism	1	86	0.00602621	0.948585	0.948585	0.0229239
Cardiac conduction	2	138	0.00966996	0.950914	0.950914	0.0218588
Asparagine N-linked glycosylation	9	421	0.0295004	0.953597	0.953597	0.020635
FCGR3A-mediated IL10 synthesis	2	141	0.00988018	0.954969	0.954969	0.0200106
Inositol phosphate metabolism	1	90	0.0063065	0.955233	0.955233	0.0198905
Degradation of beta-catenin by the destruction complex	1	91	0.00637657	0.956757	0.956757	0.0191984
Signaling by the B Cell Receptor (BCR)	3	189	0.0132436	0.957991	0.957991	0.0186384
Hedgehog 'on' state	1	92	0.00644664	0.958229	0.958229	0.0185308
The citric acid (TCA) cycle and respiratory electron transport	4	238	0.0166772	0.963806	0.963806	0.0160103
Antigen processing-Cross presentation	3	195	0.0136641	0.964025	0.964025	0.0159116
Toll Like Receptor 4 (TLR4) Cascade	2	151	0.0105809	0.966298	0.966298	0.014889
Neddylation	4	241	0.0168874	0.96631	0.96631	0.0148837
ABC transporter disorders	1	99	0.00693715	0.967222	0.967222	0.0144737
C-type lectin receptors (CLRs)	3	203	0.0142247	0.97081	0.97081	0.0128659
Antigen activates B Cell Receptor (BCR) leading to generation of second messengers	1	103	0.00721743	0.971465	0.971465	0.012573
TNFR2 non-canonical NF-kB pathway	1	104	0.00728751	0.972437	0.972437	0.0121387
Collagen formation	1	104	0.00728751	0.972437	0.972437	0.0121387
Regulation of insulin secretion	1	106	0.00742765	0.974283	0.974283	0.011315
Transcriptional regulation of white adipocyte differentiation	1	109	0.00763787	0.976823	0.976823	0.0101842
FOXO-mediated transcription	1	110	0.00770794	0.977613	0.977613	0.00983319
Interleukin-1 family signaling	2	167	0.0117021	0.978946	0.978946	0.0092414
PI Metabolism	1	112	0.00784808	0.979113	0.979113	0.00916736
Binding and Uptake of Ligands by Scavenger Receptors	2	168	0.0117721	0.979561	0.979561	0.00896855
Protein localization	2	170	0.0119123	0.98074	0.98074	0.00844627
Cargo recognition for clathrin-mediated endocytosis	1	115	0.0080583	0.981177	0.981177	0.00825283
ER-Phagosome pathway	2	173	0.0121225	0.982385	0.982385	0.00771822
Class I MHC mediated antigen processing & presentation	9	474	0.0332142	0.982833	0.982833	0.00752019
Transcriptional regulation by RUNX3	1	118	0.00826852	0.983037	0.983037	0.00743015
Platelet homeostasis	1	118	0.00826852	0.983037	0.983037	0.00743015
ABC-family proteins mediated transport	1	122	0.00854881	0.985235	0.985235	0.00646009
Downstream TCR signaling	1	124	0.00868895	0.986225	0.986225	0.00602389
Neuronal System	9	489	0.0342653	0.987254	0.987254	0.00557095
Peptide hormone metabolism	1	127	0.00889917	0.987587	0.987587	0.00542443
Metabolism of steroids	5	328	0.0229837	0.988252	0.988252	0.00513215
FCERI mediated Ca+2 mobilization	1	129	0.00903931	0.98842	0.98842	0.00505844
PI5P, PP2A and IER3 Regulate PI3K/AKT Signaling	1	129	0.00903931	0.98842	0.98842	0.00505844
MAPK1/MAPK3 signaling	5	329	0.0230537	0.988531	0.988531	0.00500975
Rab regulation of trafficking	1	131	0.00917945	0.989197	0.989197	0.00471723
Synthesis of substrates in N-glycan biosythesis	1	131	0.00917945	0.989197	0.989197	0.00471723
MAPK family signaling cascades	6	380	0.0266274	0.99048	0.99048	0.00415431
Negative regulation of the PI3K/AKT network	1	137	0.00959989	0.991229	0.991229	0.00382596
Formation of the cornified envelope	1	138	0.00966996	0.991529	0.991529	0.00369477
Nucleotide catabolism	1	144	0.0100904	0.993123	0.993123	0.00299703
Integration of energy metabolism	1	145	0.0101605	0.993358	0.993358	0.00289431
TCR signaling	1	147	0.0103006	0.993804	0.993804	0.00269932
Degradation of the extracellular matrix	1	148	0.0103707	0.994016	0.994016	0.00260682
Muscle contraction	2	213	0.0149254	0.994756	0.994756	0.00228339
Signaling by Receptor Tyrosine Kinases	11	618	0.0433046	0.995318	0.995318	0.00203799
Metabolism of carbohydrates	7	456	0.0319529	0.995574	0.995574	0.00192667
RAF/MAP kinase cascade	4	322	0.0225632	0.99568	0.99568	0.00188013
Regulation of actin dynamics for phagocytic cup formation	1	158	0.0110714	0.995773	0.995773	0.00183945
Sphingolipid metabolism	1	158	0.0110714	0.995773	0.995773	0.00183945
ADORA2B mediated anti-inflammatory cytokines production	1	159	0.0111415	0.995918	0.995918	0.00177642
Biosynthesis of the N-glycan precursor (dolichol lipid-linked oligosaccharide, LLO) and transfer to a nascent protein	1	159	0.0111415	0.995918	0.995918	0.00177642
Clathrin-mediated endocytosis	1	161	0.0112816	0.996192	0.996192	0.00165677
Transport of inorganic cations/anions and amino acids/oligopeptides	1	165	0.0115619	0.996687	0.996687	0.00144111
Arachidonic acid metabolism	1	168	0.0117721	0.997016	0.997016	0.00129798
Visual phototransduction	1	169	0.0118422	0.997118	0.997118	0.00125351
Fc epsilon receptor (FCERI) signaling	2	235	0.016467	0.997345	0.997345	0.00115478
FCERI mediated NF-kB activation	1	175	0.0122626	0.997661	0.997661	0.00101686
tRNA processing	1	182	0.0127531	0.998167	0.998167	0.000796585
Glycosaminoglycan metabolism	1	182	0.0127531	0.998167	0.998167	0.000796585
Fcgamma receptor (FCGR) dependent phagocytosis	1	193	0.0135239	0.998751	0.998751	0.000542693
Leishmania infection	4	406	0.0284493	0.999572	0.999572	0.000185934
Keratinization	1	226	0.0158363	0.999605	0.999605	0.000171369
Anti-inflammatory response favouring Leishmania parasite infection	2	297	0.0208114	0.999625	0.999625	0.00016274
Leishmania parasite growth and survival	2	297	0.0208114	0.999625	0.999625	0.00016274
Cytokine Signaling in Immune system	19	1092	0.0765188	0.999799	0.999799	8.71736e-05
Metabolism of vitamins and cofactors	3	379	0.0265574	0.999811	0.999811	8.22171e-05
Metabolism of water-soluble vitamins and cofactors	1	256	0.0179385	0.999862	0.999862	5.99672e-05
Extracellular matrix organization	2	329	0.0230537	0.999866	0.999866	5.81057e-05
Cell surface interactions at the vascular wall	1	257	0.0180085	0.999867	0.999867	5.79025e-05
Disorders of transmembrane transporters	1	278	0.0194801	0.999936	0.999936	2.77271e-05
G alpha (i) signalling events	3	426	0.0298507	0.999955	0.999955	1.9474e-05
Phase I - Functionalization of compounds	1	299	0.0209516	0.999969	0.999969	1.32629e-05
Diseases of signal transduction by growth factor receptors and second messengers	4	498	0.0348959	0.999971	0.999971	1.27716e-05
Phospholipid metabolism	1	315	0.0220727	0.999983	0.999983	7.55625e-06
Interferon Signaling	2	394	0.0276084	0.999984	0.999984	6.95307e-06
Sensory Perception	3	493	0.0345456	0.999995	0.999995	2.38832e-06
Innate Immune System	19	1334	0.0934763	0.999999	0.999999	4.35249e-07
Diseases of metabolism	1	409	0.0286595	0.999999	0.999999	2.73644e-07
SLC-mediated transmembrane transport	1	416	0.02915	1	1	2.13539e-07
Immune System	53	2684	0.188074	1	1	1.97174e-07
Fatty acid metabolism	1	431	0.0302011	1	1	1.25456e-07
Metabolism	78	3646	0.255483	1	1	4.04999e-08
Transport of small molecules	8	961	0.0673394	1	1	9.80974e-09
Biological oxidations	1	549	0.0384696	1	1	1.87336e-09
GPCR downstream signalling	4	786	0.0550767	1	1	1.55987e-09
Signaling by GPCR	4	865	0.0606124	1	1	1.16969e-10
Metabolism of lipids	14	1444	0.101184	1	1	6.24606e-11
