# Supplementary material for: Decoding the activated stem cell phenotype of the neonatally maturing pituitary
Source: eLife. 2022 Jun 14;11:e75742. doi: 10.7554/eLife.75742 (PMC9333987; doi:10.7554/eLife.75742)
Supplement: Figure 1—figure supplement 2—source data 2. — (A) Differentially expressed gene (DEG) analysis in Prolif Pou1f1+ cells versus Somato of neonatal anterior pituitary (AP). (B) DEG analysis in Prolif Cortico versus Cortico of neonatal AP. The columns represent: gene names (Gene), p values (p_val), average log fold change expression (avg_logFC; positive values indicate upregulation and negative values downregulation in first mentioned cluster), percentage of cells expressing the indicated gene in the first mentioned cluster (pct.1) and in the second mentioned cluster (pct.2), and the FDR adjusted p value (p_val_adj). (C) Gene Ontology (GO) analysis of genes upregulated in Prolif Pou1f1+ cells versus Somato in neonatal AP. (D) GO analysis of genes upregulated in Prolif Cortico versus Cortico in neonatal AP. Analyses were performed using Reactome overrepresentation analysis. Pathway name, number of mapped identifiers that match the pathway (#Entities found), total number of identifiers in the pathway (#Entities total), total entities in the pathway/total number of entities for the entire species (Entities ratio), p value, FDR, and −log10(FDR) are shown in the columns. Associated with Figure 1—figure supplement 2B. [file elife-75742-fig1-figsupp2-data2.xlsx]

## Sheet: A
DEGs Prolif Pou1f1+ cells versus Somato (neonatal AP)
Gene	p_val	avg_logFC	pct.1	pct.2	p_val_adj
Hmgb2	0	2.51582	0.994	0.638	0
Top2a	0	2.37848	0.848	0.01	0
Cenpf	0	2.22632	0.778	0.07	0
Ube2c	0	1.87723	0.691	0.031	0
Mki67	0	1.76903	0.777	0.032	0
Prc1	0	1.75033	0.746	0.018	0
Cks2	0	1.66897	0.821	0.099	0
Cdk1	0	1.59718	0.831	0.023	0
Cenpa	0	1.59678	0.678	0.038	0
Birc5	0	1.58153	0.781	0.021	0
Lockd	0	1.57454	0.869	0.127	0
Cdca3	0	1.50857	0.772	0.037	0
Spc25	0	1.49619	0.77	0.015	0
Pbk	0	1.46499	0.761	0.002	0
Nusap1	0	1.43972	0.705	0.006	0
Cdca8	0	1.42726	0.804	0.021	0
Smc2	0	1.41664	0.845	0.161	0
Pclaf	0	1.36779	0.676	0.021	0
Hmmr	0	1.36065	0.703	0.001	0
Tpx2	0	1.329	0.746	0.011	0
Spc24	0	1.20128	0.813	0.024	0
Cenpw	0	1.15663	0.834	0.08	0
Kif11	0	1.06165	0.663	0.013	0
Ccnb2	0	1.05299	0.707	0.017	0
Cdc20	0	1.02751	0.589	0.014	0
Kif23	0	1.02629	0.644	0.016	0
Ccna2	0	1.00244	0.7	0.015	0
Mns1	0	0.991243	0.761	0.047	0
Cenpe	0	0.976354	0.619	0.027	0
Knl1	0	0.975526	0.707	0.015	0
Mis18bp1	0	0.894278	0.598	0.005	0
Ccnb1	0	0.891011	0.598	0.008	0
Kif20b	0	0.876517	0.648	0.023	0
Tacc3	0	0.859667	0.71	0.046	0
Clspn	0	0.839648	0.641	0.022	0
Ezh2	0	0.838649	0.743	0.075	0
Knstrn	0	0.837935	0.679	0.016	0
Ncapg2	0	0.833462	0.695	0.066	0
Cenpm	0	0.831353	0.759	0.027	0
Esco2	0	0.796055	0.544	0.003	0
Cenpp	0	0.793274	0.758	0.075	0
Cenpk	0	0.789438	0.758	0.048	0
Arhgap11a	0	0.787104	0.657	0.019	0
Ckap2l	0	0.779107	0.632	0.002	0
Ube2t	0	0.770652	0.697	0.049	0
Kif15	0	0.760391	0.651	0.011	0
Mad2l1	0	0.753936	0.737	0.047	0
Rrm2	0	0.753173	0.514	0.002	0
Asf1b	0	0.747843	0.691	0.018	0
Incenp	0	0.743424	0.638	0.04	0
Ncapd2	0	0.734168	0.737	0.072	0
Ckap2	0	0.725092	0.616	0.022	0
Fam111a	0	0.724742	0.654	0.03	0
Cenph	0	0.719399	0.697	0.036	0
Aspm	0	0.710161	0.522	0.005	0
Ect2	0	0.709085	0.62	0.013	0
Cdkn2c	0	0.685295	0.56	0.014	0
Ndc80	0	0.672497	0.648	0.008	0
Aurkb	0	0.670753	0.565	0.005	0
Mxd3	0	0.669414	0.582	0.003	0
Dtl	0	0.660389	0.6	0.028	0
Rad51	0	0.653717	0.665	0.026	0
Nek2	0	0.65056	0.592	0.004	0
Anln	0	0.647644	0.571	0.01	0
Shcbp1	0	0.644726	0.609	0.008	0
Pimreg	0	0.643074	0.501	0.002	0
Dbf4	0	0.612218	0.62	0.032	0
Dlgap5	0	0.597751	0.587	0.005	0
Rad51ap1	0	0.585033	0.62	0.019	0
Kif4	0	0.568604	0.592	0.013	0
Bub1	0	0.556787	0.565	0.001	0
Sgo2a	0	0.542393	0.514	0.005	0
Kifc1	0	0.531376	0.573	0.006	0
Uhrf1	0	0.512879	0.55	0.013	0
Ncaph	0	0.509939	0.566	0.008	0
Ncapg	0	0.496385	0.534	0.002	0
Cdca2	0	0.490975	0.515	0.005	0
Nuf2	0	0.485583	0.542	0.003	0
Spag5	0	0.483313	0.549	0.004	0
Depdc1a	0	0.464772	0.496	0.001	0
Cdkn3	5.52706e-305	0.637076	0.522	0.009	1.37369e-300
Gas2l3	3.14581e-304	0.58266	0.533	0.012	7.8186e-300
Sgo1	3.77258e-303	0.485813	0.533	0.012	9.37636e-299
Dnph1	1.45311e-302	0.584411	0.66	0.051	3.61157e-298
Ttk	1.03574e-301	0.422202	0.499	0.004	2.57423e-297
Neil3	1.89809e-301	0.465838	0.506	0.006	4.71751e-297
Kif20a	2.04202e-300	0.540085	0.517	0.009	5.07525e-296
Atad2	1.35434e-297	1.14925	0.724	0.091	3.36609e-293
Sapcd2	6.89363e-293	0.510578	0.496	0.007	1.71334e-288
H2afz	2.2684e-292	1.8109	0.998	0.942	5.63789e-288
Stmn1	3.32651e-292	1.82482	1	0.918	8.26772e-288
Ska1	4.39689e-290	0.38228	0.472	0.002	1.0928e-285
Cdca5	1.63597e-289	0.390618	0.47	0.002	4.06603e-285
Tcf19	2.75807e-287	0.730169	0.593	0.037	6.85492e-283
Smc4	1.1284e-285	1.50928	0.895	0.282	2.80453e-281
Brca1	1.44808e-285	0.507861	0.555	0.025	3.59906e-281
Aurka	4.18231e-283	0.543961	0.494	0.01	1.03947e-278
Cks1b	1.02916e-280	1.00685	0.821	0.182	2.55787e-276
Bub1b	2.2096e-279	0.417526	0.499	0.012	5.49174e-275
Plk1	9.61155e-279	0.543156	0.469	0.005	2.38885e-274
Gmnn	3.23929e-278	0.833238	0.716	0.099	8.05092e-274
Hells	4.3765e-277	0.765668	0.616	0.05	1.08773e-272
Hist1h1b	4.39059e-277	1.51917	0.458	0.003	1.09124e-272
Mcm3	2.61798e-276	0.733304	0.636	0.057	6.50674e-272
Selenoh	1.85083e-273	1.3222	0.959	0.485	4.60005e-269
C330027C09Rik	1.57884e-272	0.470827	0.518	0.019	3.92405e-268
Mcm5	2.2128e-270	0.605889	0.635	0.057	5.49968e-266
Kntc1	2.452e-270	0.36205	0.504	0.016	6.09419e-266
Rfc4	1.24178e-269	0.662691	0.716	0.099	3.08633e-265
E2f8	1.37274e-267	0.384103	0.458	0.006	3.4118e-263
Kif18a	3.75607e-266	0.570144	0.537	0.029	9.33533e-262
Melk	5.45576e-266	0.327419	0.426	0	1.35598e-261
Fignl1	3.9842e-265	0.365128	0.515	0.021	9.90233e-261
Cdc45	5.07011e-265	0.415503	0.518	0.023	1.26013e-260
Rrm1	6.58243e-265	0.981322	0.769	0.152	1.636e-260
Kif14	6.58078e-263	0.319651	0.431	0.002	1.63559e-258
Hmgb1	1.13699e-260	1.25342	0.995	0.946	2.82588e-256
Troap	1.65353e-258	0.359341	0.429	0.003	4.10968e-254
Foxm1	6.06345e-257	0.318697	0.443	0.006	1.50701e-252
H2afv	1.72761e-251	1.38776	0.981	0.81	4.29381e-247
Nrm	4.04575e-251	0.442674	0.506	0.025	1.00553e-246
Trim59	4.32385e-251	0.607027	0.604	0.059	1.07465e-246
Tyms	1.70382e-250	0.990599	0.762	0.158	4.23468e-246
Trip13	6.35548e-250	0.341463	0.464	0.013	1.57959e-245
Cenpu	1.16778e-249	0.356497	0.485	0.019	2.90241e-245
Iqgap3	3.55225e-249	0.329221	0.418	0.003	8.82877e-245
Ppia	1.4876e-242	0.961206	0.998	0.981	3.69727e-238
Tedc1	8.78858e-241	0.346717	0.534	0.035	2.18431e-236
Tubb5	2.97279e-239	1.81095	0.99	0.849	7.38857e-235
Ptma	1.39814e-237	1.00311	0.998	0.989	3.47495e-233
Ccdc34	2.54912e-237	1.05801	0.876	0.309	6.33559e-233
Brip1	3.66069e-237	0.307744	0.4	0.003	9.09829e-233
Fbxo5	3.41307e-236	0.682486	0.595	0.069	8.48285e-232
Haus4	1.00185e-235	0.358006	0.485	0.024	2.49e-231
Mybl1	2.62265e-235	0.336662	0.463	0.018	6.51832e-231
Spdl1	1.28688e-233	0.333942	0.432	0.012	3.19842e-229
Chaf1a	3.98499e-233	0.375478	0.502	0.03	9.9043e-229
Rangap1	4.48102e-233	0.902697	0.85	0.292	1.11371e-228
H2afx	9.78548e-233	1.54862	0.888	0.383	2.43208e-228
Rnaseh2c	2.178e-231	0.89984	0.922	0.411	5.4132e-227
Hist1h2ap	1.46124e-229	1.04404	0.427	0.013	3.63177e-225
Zwilch	2.90544e-229	0.320752	0.514	0.034	7.22118e-225
Gins2	7.17011e-229	0.503993	0.533	0.042	1.78206e-224
Ran	1.85172e-227	1.07444	0.981	0.817	4.60226e-223
Lig1	1.61155e-226	1.02562	0.742	0.169	4.00535e-222
Jpt1	3.77957e-223	1.38636	0.864	0.342	9.39374e-219
Ube2s	1.19874e-222	1.27485	0.979	0.834	2.97935e-218
Zfp367	2.44981e-222	0.53391	0.576	0.065	6.08876e-218
Mastl	3.93816e-221	0.259587	0.416	0.012	9.7879e-217
H1fx	1.11917e-220	1.44828	0.949	0.534	2.78159e-216
Ska3	2.17489e-220	0.256578	0.376	0.004	5.40548e-216
Dut	2.26794e-219	1.23603	0.923	0.489	5.63673e-215
Fen1	2.24581e-218	0.528602	0.663	0.108	5.58173e-214
Topbp1	6.56616e-217	0.686062	0.759	0.178	1.63195e-212
Hjurp	1.9792e-215	1.0448	0.818	0.29	4.91911e-211
Chaf1b	2.9124e-215	0.438631	0.448	0.023	7.23848e-211
Cdc25c	1.09132e-213	0.305289	0.364	0.003	2.71236e-209
Tk1	2.27424e-213	0.347726	0.368	0.005	5.65241e-209
Slfn9	6.86445e-213	0.441503	0.368	0.005	1.70609e-208
Tuba1b	5.15881e-212	1.572	0.954	0.683	1.28217e-207
Hist1h3c	8.49871e-212	0.441315	0.359	0.003	2.11227e-207
Tbc1d31	3.87004e-211	0.405298	0.528	0.05	9.6186e-207
Hmgn2	2.52561e-210	1.07226	0.981	0.782	6.27716e-206
Kif22	4.30072e-207	0.585158	0.62	0.101	1.0689e-202
Mcm6	3.03608e-206	0.671958	0.625	0.103	7.54587e-202
Exo1	8.47393e-206	0.258199	0.372	0.008	2.10611e-201
4930579G24Rik	2.18735e-205	0.350745	0.466	0.032	5.43645e-201
Kif2c	6.27107e-205	0.28679	0.333	0	1.55861e-200
Cenpn	6.53567e-205	0.348767	0.547	0.058	1.62438e-200
Plk4	1.98258e-202	0.394584	0.539	0.06	4.9275e-198
Lmnb1	5.7943e-202	0.745017	0.729	0.181	1.44012e-197
Hsp90aa1	7.96788e-202	0.882678	0.989	0.963	1.98034e-197
Pmf1	1.85317e-200	0.51145	0.681	0.133	4.60587e-196
Anp32e	5.20714e-200	1.01591	0.917	0.519	1.29418e-195
Tubb4b	6.08586e-200	1.58324	0.96	0.744	1.51258e-195
Psmc3ip	4.42394e-198	0.492278	0.622	0.099	1.09953e-193
Cenps	3.36579e-196	0.346453	0.491	0.044	8.36534e-192
Dnajc9	4.07947e-194	0.987838	0.871	0.433	1.01391e-189
Pola1	2.51612e-193	0.498671	0.55	0.073	6.25357e-189
Tuba1c	2.51277e-191	0.755128	0.466	0.043	6.24523e-187
Dek	1.37258e-190	1.21339	0.946	0.738	3.41141e-186
Pole	1.25314e-188	0.277444	0.41	0.023	3.11456e-184
Dhfr	1.54722e-187	0.647294	0.662	0.141	3.84546e-183
Cenpl	6.50643e-187	0.268102	0.378	0.016	1.61711e-182
Prim1	6.19479e-186	0.592228	0.654	0.138	1.53965e-181
Mms22l	1.63742e-185	0.287588	0.432	0.031	4.06964e-181
Anp32b	4.24887e-182	0.890118	0.981	0.857	1.05601e-177
Mcm7	6.69099e-182	0.645636	0.738	0.212	1.66298e-177
Rbm3	7.2346e-180	0.628649	0.989	0.953	1.79809e-175
Hist1h2af	6.09471e-179	0.277661	0.295	0	1.51478e-174
Hist1h1a	1.00429e-178	0.350866	0.297	0.001	2.49607e-174
Nasp	2.49765e-178	0.914733	0.914	0.532	6.20765e-174
Hmgn1	3.96384e-178	0.637456	0.987	0.931	9.85173e-174
Cdt1	1.18962e-175	0.30118	0.41	0.03	2.95669e-171
Brip1os	1.25875e-175	0.384584	0.566	0.089	3.12849e-171
Racgap1	1.66716e-175	0.887591	0.893	0.485	4.14355e-171
Hist1h2ab	1.99585e-174	0.34714	0.301	0.003	4.96049e-170
E2f7	1.47485e-173	0.260969	0.392	0.025	3.6656e-169
Psat1	8.97168e-172	0.282221	0.464	0.048	2.22982e-167
Pcna	6.54567e-171	0.970619	0.734	0.242	1.62686e-166
Nde1	5.92626e-170	0.306422	0.386	0.025	1.47291e-165
Sass6	7.6794e-170	0.314149	0.518	0.07	1.90864e-165
Mcm2	8.80789e-170	0.542909	0.59	0.111	2.18911e-165
Ccdc18	4.01711e-169	0.316127	0.461	0.048	9.98413e-165
Cep192	8.25147e-169	0.329213	0.525	0.073	2.05082e-164
Hat1	2.52649e-168	0.676482	0.766	0.262	6.27934e-164
Calm2	4.16525e-168	0.942423	0.992	0.972	1.03523e-163
Usp1	1.20903e-166	0.674563	0.778	0.276	3.00491e-162
Tmpo	3.79332e-166	0.847212	0.9	0.622	9.42792e-162
Zgrf1	2.61437e-165	0.293951	0.469	0.054	6.49774e-161
Dtymk	4.86658e-165	0.820156	0.863	0.433	1.20954e-160
Nucks1	5.23247e-165	0.778563	0.954	0.817	1.30048e-160
1500009L16Rik	5.96911e-165	0.470016	0.569	0.102	1.48356e-160
Neto2	6.85419e-165	0.304519	0.453	0.048	1.70354e-160
Lsm2	1.02917e-164	0.662194	0.845	0.381	2.5579e-160
Pold1	4.83233e-164	0.25415	0.434	0.042	1.20103e-159
Diaph3	7.65724e-163	0.483141	0.63	0.139	1.90313e-158
Sae1	1.1825e-162	0.635667	0.81	0.312	2.93898e-158
Wee1	1.05835e-161	0.351718	0.566	0.101	2.63043e-157
Prdx4	6.00712e-161	0.78687	0.947	0.669	1.49301e-156
Hmgb3	3.25815e-160	0.823738	0.866	0.45	8.0978e-156
Hist1h4i	4.64447e-160	0.66853	0.628	0.147	1.15434e-155
Lin9	9.28893e-159	0.271187	0.47	0.057	2.30867e-154
Hist1h2ae	3.82754e-158	1.00828	0.466	0.068	9.51297e-154
Rpa2	3.20353e-156	0.608076	0.684	0.196	7.96206e-152
Blm	1.81315e-155	0.293268	0.463	0.058	4.5064e-151
Snrpd1	2.73315e-155	0.73726	0.957	0.8	6.79296e-151
Cdca7l	2.50142e-153	0.320976	0.485	0.07	6.21704e-149
Gpsm2	7.35189e-153	0.325559	0.48	0.067	1.82724e-148
Tipin	5.87144e-152	0.666583	0.73	0.252	1.45929e-147
Haus5	8.97192e-151	0.265147	0.424	0.045	2.22988e-146
Kpna2	1.11132e-150	0.351409	0.4	0.041	2.76207e-146
E2f1	1.44683e-150	0.435116	0.498	0.08	3.59595e-146
Wdhd1	1.72618e-150	0.350292	0.467	0.065	4.29025e-146
Tagln2	1.77967e-150	0.841108	0.726	0.253	4.42319e-146
Hint1	6.76233e-150	0.588313	0.99	0.948	1.68071e-145
Wdr76	2.09712e-149	0.348467	0.431	0.052	5.21218e-145
Hist1h1d	8.35113e-148	0.339074	0.319	0.017	2.07559e-143
Arhgap19	4.10323e-147	0.2885	0.47	0.067	1.01982e-142
Hmgn5	1.78067e-145	0.742376	0.807	0.357	4.42568e-141
Srsf2	2.00832e-145	0.645246	0.96	0.793	4.99149e-141
Reep4	2.64829e-145	0.321769	0.415	0.048	6.58206e-141
Cenpq	7.22752e-145	0.439538	0.633	0.16	1.79633e-140
Rcc1	2.3021e-142	0.277892	0.408	0.046	5.72164e-138
Atad5	8.20569e-140	0.400923	0.515	0.098	2.03944e-135
Mcm4	8.91835e-140	0.511935	0.571	0.132	2.21657e-135
Ccne2	1.21116e-139	0.455194	0.475	0.079	3.01022e-135
Ncapd3	1.00539e-138	0.618989	0.73	0.276	2.4988e-134
Alyref	3.34542e-138	0.634234	0.911	0.595	8.31472e-134
Cit	5.8154e-138	0.407606	0.566	0.126	1.44536e-133
Rad21	1.11288e-137	0.773386	0.874	0.55	2.76595e-133
Brca2	2.18022e-137	0.304703	0.456	0.069	5.41871e-133
Srsf7	1.52119e-135	0.6519	0.901	0.598	3.78077e-131
Nudc	2.68275e-135	0.638599	0.941	0.811	6.6677e-131
Ybx1	3.65898e-135	0.570054	0.986	0.942	9.09402e-131
Calm1	9.36691e-134	0.641019	0.99	0.949	2.32805e-129
Hirip3	2.745e-133	0.567786	0.727	0.27	6.82242e-129
Haus8	1.5525e-132	0.309216	0.48	0.083	3.85859e-128
Haus3	3.41818e-132	0.313533	0.539	0.11	8.49555e-128
Pbx4	2.92056e-131	0.448459	0.62	0.163	7.25875e-127
Stk17b	3.95291e-131	0.289246	0.344	0.032	9.82457e-127
Hnrnpab	7.17451e-131	0.671632	0.943	0.821	1.78315e-126
Pkmyt1	1.31635e-130	0.263759	0.474	0.079	3.27166e-126
Rfc5	8.63303e-130	0.265912	0.469	0.079	2.14565e-125
Cdk5rap2	1.24746e-129	0.46295	0.671	0.21	3.10043e-125
Hnrnpa2b1	1.39801e-129	0.577673	0.984	0.971	3.4746e-125
Banf1	1.06349e-127	0.613077	0.904	0.607	2.64321e-123
Ska2	2.45404e-127	0.291659	0.458	0.077	6.09928e-123
Tubg1	3.33884e-127	0.576067	0.766	0.331	8.29836e-123
Hdgf	1.82065e-125	0.649657	0.944	0.797	4.52504e-121
Dnmt1	2.83577e-124	0.707552	0.754	0.361	7.04801e-120
Smc1a	6.44629e-124	0.684934	0.9	0.662	1.60216e-119
Rpa1	9.37364e-124	0.312701	0.477	0.091	2.32973e-119
Lsm3	1.70347e-123	0.540794	0.868	0.504	4.2338e-119
Rfc3	4.07808e-123	0.672401	0.805	0.424	1.01357e-118
Fkbp2	7.52467e-123	0.613365	0.965	0.809	1.87018e-118
Rnaseh2b	1.88962e-122	0.311964	0.557	0.13	4.69646e-118
Ckap5	3.98937e-121	0.720022	0.829	0.473	9.91519e-117
Itgb3bp	9.11247e-121	0.412871	0.687	0.232	2.26481e-116
Lsm5	3.25576e-120	0.63691	0.906	0.612	8.09186e-116
Mthfd2	7.21016e-120	0.392088	0.545	0.133	1.79201e-115
Skp2	3.51366e-119	0.2719	0.453	0.08	8.73284e-115
Ddx39	4.88456e-118	0.438712	0.689	0.235	1.21401e-113
Orc6	9.79958e-116	0.548215	0.727	0.317	2.43559e-111
Vrk1	4.68209e-115	0.326696	0.579	0.154	1.16369e-110
Tex30	4.73482e-115	0.386087	0.638	0.201	1.17679e-110
Nap1l1	1.01351e-114	0.60505	0.959	0.853	2.51897e-110
D030056L22Rik	1.18507e-114	0.438224	0.689	0.248	2.94538e-110
Cdkn2d	1.42469e-113	0.796162	0.831	0.505	3.54093e-109
Arl4c	1.71879e-113	0.29387	0.423	0.075	4.27188e-109
Cntrob	2.11437e-113	0.251678	0.463	0.091	5.25505e-109
Lin54	2.96846e-113	0.289437	0.533	0.126	7.37781e-109
Zcwpw1	3.10045e-113	0.281898	0.416	0.069	7.70585e-109
Lsm6	3.83173e-113	0.545664	0.925	0.674	9.52337e-109
1810037I17Rik	5.69785e-113	0.782648	0.952	0.833	1.41614e-108
Hist2h3c2	8.24374e-113	0.260586	0.333	0.039	2.0489e-108
Cep85	8.33315e-113	0.291294	0.504	0.113	2.07112e-108
Cdc25b	6.59434e-112	0.274155	0.416	0.073	1.63896e-107
Prim2	6.5145e-111	0.290077	0.515	0.119	1.61911e-106
Ppih	6.54397e-111	0.270694	0.53	0.12	1.62644e-106
Pgp	3.93795e-110	0.58289	0.826	0.45	9.78738e-106
Nxt1	7.84352e-109	0.452382	0.67	0.242	1.94943e-104
Exosc8	1.71355e-108	0.389765	0.691	0.256	4.25887e-104
Srsf3	1.92112e-107	0.557416	0.971	0.913	4.77475e-103
Nsmce4a	2.54829e-107	0.537078	0.911	0.679	6.33351e-103
Kmt5a	4.14589e-106	0.402011	0.606	0.198	1.03042e-101
Impdh2	2.19295e-105	0.440338	0.805	0.387	5.45037e-101
G2e3	2.3798e-105	0.499354	0.59	0.198	5.91475e-101
Lbr	8.61455e-105	0.321242	0.577	0.163	2.14106e-100
Cep295	1.65224e-104	0.431804	0.665	0.25	4.10648e-100
Slbp	2.98379e-104	0.752896	0.789	0.481	7.4159e-100
Tpm4	3.92411e-104	0.453411	0.766	0.338	9.75298e-100
Cntln	4.33917e-104	0.463501	0.727	0.303	1.07846e-99
Ptges3	6.545e-104	0.499863	0.968	0.84	1.62669e-99
Haus1	8.5061e-104	0.268595	0.522	0.128	2.11411e-99
Ssna1	4.85411e-103	0.53304	0.868	0.541	1.20644e-98
Gm1673	8.15594e-103	0.603664	0.965	0.888	2.02708e-98
Cox7a2	3.91836e-102	0.472255	0.979	0.939	9.73869e-98
Snrnp25	4.74788e-102	0.307971	0.587	0.177	1.18004e-97
Txn1	6.42308e-102	0.526865	0.974	0.866	1.59639e-97
Psip1	9.02447e-102	0.515814	0.96	0.908	2.24294e-97
Rfc2	1.89354e-101	0.600829	0.807	0.472	4.70621e-97
Carhsp1	1.15674e-100	0.265515	0.48	0.111	2.87496e-96
Rbbp7	2.94345e-99	0.504597	0.927	0.722	7.31564e-95
Nup85	6.59007e-99	0.283405	0.531	0.14	1.6379e-94
Hnrnpd	9.45002e-99	0.524376	0.949	0.829	2.34871e-94
Clic1	2.28066e-98	0.598568	0.933	0.754	5.66834e-94
Ranbp1	1.15231e-97	0.640616	0.962	0.829	2.86396e-93
Larp7	4.53481e-97	0.392792	0.718	0.297	1.12708e-92
Fabp5	8.89855e-97	0.559859	0.734	0.314	2.21165e-92
Lsm8	1.77892e-96	0.484291	0.855	0.56	4.42133e-92
Cbx3	2.65706e-96	0.472278	0.965	0.908	6.60385e-92
Suv39h1	3.53046e-96	0.25338	0.531	0.143	8.7746e-92
Actb	6.78994e-96	0.506247	0.998	0.995	1.68757e-91
Pih1d1	1.19481e-95	0.277402	0.522	0.139	2.96958e-91
Dctpp1	5.71527e-95	0.562641	0.673	0.292	1.42047e-90
Ccdc61	9.76613e-95	0.276287	0.4	0.081	2.42728e-90
Bub3	1.09259e-94	0.545879	0.879	0.647	2.71552e-90
Cdkn1a	1.16633e-94	0.546657	0.694	0.286	2.89881e-90
Arl6ip1	1.49116e-93	1.13425	0.952	0.839	3.70614e-89
Nop56	9.31165e-93	0.491234	0.871	0.578	2.31432e-88
Crip2	2.05296e-92	0.463729	0.662	0.27	5.10243e-88
Eri1	2.18578e-92	0.352889	0.547	0.171	5.43255e-88
Snrpe	2.47053e-92	0.506107	0.947	0.843	6.14026e-88
Lyar	1.01823e-91	0.352469	0.722	0.302	2.53072e-87
Hnrnpa1	1.62477e-91	0.500069	0.974	0.927	4.03821e-87
Gltp	3.86348e-91	0.310414	0.541	0.163	9.6023e-87
Ssrp1	5.80127e-91	0.504074	0.882	0.625	1.44185e-86
2011-09-01	7.21402e-91	0.369666	0.6	0.207	1.79297e-86
Hnrnpa3	8.6817e-91	0.48947	0.978	0.936	2.15775e-86
Rbbp8	1.10348e-90	0.340581	0.641	0.228	2.74258e-86
Smc6	1.8027e-90	0.629378	0.868	0.676	4.48044e-86
Tuba1a	2.02145e-90	0.631843	0.974	0.944	5.0241e-86
H3f3b	4.09184e-90	0.719002	0.998	0.993	1.01699e-85
Cycs	5.62136e-90	0.510208	0.911	0.666	1.39713e-85
Dpy30	5.68494e-90	0.498866	0.841	0.526	1.41293e-85
Mrfap1	1.28383e-89	0.435057	0.997	0.96	3.19084e-85
Hnrnpa0	3.09006e-89	0.449493	0.965	0.892	7.68002e-85
Cdc25a	1.24191e-88	0.305794	0.56	0.179	3.08665e-84
Casp3	1.5218e-88	0.346606	0.648	0.242	3.78229e-84
Suz12	8.13668e-88	0.495051	0.826	0.537	2.02229e-83
H2afy	3.27736e-87	0.466536	0.955	0.888	8.14555e-83
Cep57	8.05123e-87	0.437013	0.715	0.336	2.00105e-82
Ptms	1.04309e-86	0.703977	0.986	0.96	2.59249e-82
Hspa14	2.34857e-86	0.39526	0.71	0.34	5.83714e-82
Calm3	4.03438e-86	0.603076	0.885	0.678	1.0027e-81
Ncaph2	4.93769e-86	0.327815	0.622	0.232	1.22721e-81
Xpo1	6.4469e-86	0.406551	0.78	0.415	1.60231e-81
Gm5914	7.87249e-86	0.401608	0.732	0.338	1.95663e-81
Gh	1.40259e-84	-0.626509	0.817	0.993	3.48599e-80
Gm11837	2.73929e-84	0.335157	0.429	0.107	6.80824e-80
Tubb6	6.61419e-84	0.308961	0.482	0.139	1.64389e-79
Siva1	6.63081e-84	0.584596	0.781	0.499	1.64802e-79
Myef2	7.36742e-84	0.484824	0.885	0.603	1.8311e-79
Tceal9	8.13752e-84	0.374056	0.994	0.977	2.0225e-79
Prdx1	1.45829e-83	0.462175	0.99	0.923	3.62443e-79
Arpp19	1.72541e-83	0.455601	0.903	0.731	4.28834e-79
Cse1l	3.88026e-83	0.264641	0.587	0.196	9.644e-79
H3f3a	4.24016e-83	0.455966	0.998	0.983	1.05385e-78
Dynlt1f	7.67516e-83	0.313261	0.601	0.212	1.90758e-78
Nudt4	4.87938e-82	0.302392	0.566	0.196	1.21272e-77
Me2	5.26657e-82	0.250426	0.498	0.146	1.30895e-77
Rpl10	1.10497e-81	-0.3827	0.99	0.984	2.7463e-77
Aldoa	1.16373e-81	-0.529711	0.766	0.91	2.89234e-77
Dbi	2.21388e-81	0.534301	0.922	0.673	5.50239e-77
Odc1	3.93022e-81	0.50026	0.909	0.642	9.76816e-77
Hist1h4d	1.10844e-80	0.965285	0.526	0.208	2.75491e-76
Hnrnpf	7.81664e-80	0.450895	0.943	0.841	1.94275e-75
Cbx5	2.54869e-79	0.4446	0.935	0.827	6.33452e-75
Thoc7	3.36952e-79	0.481236	0.882	0.656	8.37461e-75
Cbx1	4.12286e-79	0.417187	0.914	0.731	1.02469e-74
Hnrnpu	1.05737e-78	0.459274	0.96	0.893	2.62798e-74
Uchl5	1.75542e-78	0.254491	0.603	0.217	4.36292e-74
Ncl	4.36789e-78	0.436982	0.968	0.921	1.0856e-73
G3bp1	1.07132e-77	0.406501	0.919	0.692	2.66265e-73
Naa50	1.29224e-77	0.370331	0.766	0.393	3.21173e-73
Anapc11	8.53539e-77	0.433797	0.906	0.63	2.12139e-72
Hpf1	3.70782e-76	0.454143	0.844	0.566	9.21541e-72
Rad18	5.50238e-76	0.288323	0.638	0.253	1.36756e-71
Nsd2	1.89804e-75	0.442052	0.81	0.495	4.71739e-71
Abracl	3.36804e-75	0.360133	0.589	0.224	8.37093e-71
Slf1	1.45479e-74	0.263617	0.526	0.176	3.61573e-70
Zfp91	1.50516e-74	0.423063	0.903	0.729	3.74092e-70
Terf1	2.06239e-74	0.284166	0.53	0.184	5.12587e-70
Smchd1	7.34926e-74	0.45144	0.818	0.566	1.82658e-69
Ppp1cc	1.06135e-73	0.411033	0.852	0.594	2.63788e-69
Smc3	2.17479e-73	0.467992	0.896	0.782	5.40523e-69
Coq7	3.31301e-73	0.362372	0.828	0.476	8.23414e-69
Tmsb10	3.78157e-73	0.53913	0.978	0.903	9.39873e-69
Actn4	5.88262e-73	0.367255	0.807	0.468	1.46207e-68
Cox8a	7.52325e-73	0.377244	0.995	0.971	1.86983e-68
Mis12	2.45703e-72	0.281268	0.553	0.197	6.1067e-68
Snrpb	2.68438e-72	0.413595	0.947	0.863	6.67175e-68
Ubald2	3.20279e-72	0.497009	0.766	0.463	7.96023e-68
Snrpf	3.35662e-72	0.396133	0.976	0.906	8.34255e-68
Fam81a	4.48241e-72	0.258538	0.47	0.147	1.11406e-67
Pfn1	1.11345e-71	0.403445	0.954	0.849	2.76737e-67
Stub1	1.5668e-71	0.435852	0.938	0.831	3.89413e-67
Scoc	1.11325e-70	0.406929	0.815	0.507	2.76687e-66
Cenpv	1.57529e-70	0.258367	0.581	0.218	3.91522e-66
AC160336.1	2.63488e-70	0.715845	0.904	0.705	6.54874e-66
Rnf168	6.35646e-70	0.313335	0.558	0.221	1.57983e-65
Nav2	1.19968e-69	0.303644	0.536	0.195	2.98168e-65
Snrpg	1.26888e-69	0.373256	0.96	0.886	3.15366e-65
Snrpa1	1.766e-69	0.350372	0.81	0.474	4.38923e-65
Ctcf	1.8757e-69	0.424845	0.831	0.566	4.66187e-65
Nelfe	3.35494e-69	0.436831	0.778	0.479	8.33836e-65
Cfl1	1.49606e-68	0.385432	0.987	0.954	3.7183e-64
Rpl17	1.53788e-68	-0.295735	0.998	0.989	3.82225e-64
Tubb2a	2.52225e-68	0.363123	0.603	0.252	6.2688e-64
Ywhae	3.93019e-68	0.352028	0.978	0.968	9.7681e-64
Nsmce1	4.14888e-68	0.394405	0.772	0.455	1.03116e-63
Cby1	4.35221e-68	0.387395	0.751	0.405	1.0817e-63
Fmr1	4.35891e-68	0.342761	0.766	0.41	1.08336e-63
Pbxip1	6.45569e-68	-0.451008	0.654	0.843	1.6045e-63
Mpp6	1.15691e-67	0.335168	0.7	0.351	2.87538e-63
Eif1ad	5.13037e-67	0.320812	0.679	0.325	1.2751e-62
Raly	8.14923e-67	0.393871	0.935	0.753	2.02541e-62
Pa2g4	2.60355e-66	0.387017	0.815	0.501	6.47088e-62
Gsr	2.74751e-66	0.260159	0.506	0.181	6.82866e-62
Pold3	1.12002e-65	0.319712	0.606	0.266	2.78369e-61
Cox5a	2.31103e-65	0.381137	0.895	0.649	5.74383e-61
Nt5dc2	3.14006e-65	0.435814	0.872	0.636	7.8043e-61
Rbbp4	2.10627e-64	0.437204	0.911	0.788	5.23492e-60
Ak6	3.38286e-64	0.261183	0.608	0.251	8.40775e-60
Ndufaf2	7.20373e-64	0.263597	0.6	0.248	1.79041e-59
Polr2a	9.86838e-64	0.407974	0.823	0.582	2.45269e-59
Pcmt1	1.63338e-63	0.362648	0.939	0.799	4.05961e-59
Pgk1	1.76388e-63	0.386868	0.861	0.6	4.38396e-59
Txndc12	1.87289e-63	0.353527	0.794	0.486	4.65488e-59
Eif1	2.23518e-63	0.291544	0.997	0.992	5.55532e-59
Elob	8.08605e-63	0.352446	0.982	0.936	2.00971e-58
Rpl34	1.21137e-62	-0.267401	0.995	0.987	3.01073e-58
Rps21	1.48337e-62	-0.273904	0.998	0.998	3.68677e-58
Rps27	3.0563e-62	-0.278919	0.995	0.989	7.59613e-58
Gm2694	7.11819e-62	0.415546	0.622	0.279	1.76916e-57
Ssb	1.70509e-61	0.340341	0.96	0.903	4.23784e-57
Ppm1g	1.81223e-61	0.403256	0.844	0.602	4.50412e-57
Marcks	2.43522e-61	0.542724	0.903	0.768	6.05249e-57
Ift80	2.97169e-61	0.322931	0.679	0.344	7.38585e-57
Hspa2	6.41481e-61	0.282587	0.464	0.162	1.59434e-56
Ebp	9.4811e-61	0.310169	0.648	0.307	2.35643e-56
Rpl37	4.9953e-60	-0.27074	1	0.994	1.24153e-55
Pcnt	1.01862e-59	0.273837	0.595	0.26	2.53168e-55
Oxct1	1.99373e-59	0.388552	0.722	0.417	4.95522e-55
Casp8ap2	2.66908e-59	0.362334	0.686	0.363	6.63373e-55
Myh9	3.08877e-59	0.264798	0.577	0.252	7.67682e-55
Tcp1	3.23115e-59	0.340844	0.928	0.817	8.0307e-55
Jpt2	4.90735e-59	0.250928	0.552	0.229	1.21967e-54
Hprt	6.72519e-59	0.370659	0.844	0.603	1.67148e-54
Elof1	1.38352e-58	0.375399	0.898	0.744	3.43861e-54
Dnajc21	1.58983e-58	0.453082	0.887	0.722	3.95136e-54
Nop58	1.70064e-58	0.379756	0.893	0.711	4.22676e-54
Rpa3	1.94426e-58	0.274672	0.561	0.234	4.83227e-54
Smarca5	1.95537e-58	0.39665	0.933	0.838	4.85989e-54
Gtf2a2	3.21722e-58	0.358736	0.879	0.691	7.99609e-54
Pnp	3.78886e-58	0.335443	0.775	0.476	9.41684e-54
Cdk4	5.67258e-58	0.365764	0.928	0.777	1.40986e-53
Tpi1	2.93179e-57	0.362112	0.949	0.867	7.28666e-53
Rnaseh2a	5.54566e-57	0.266905	0.585	0.26	1.37832e-52
Rdx	7.24218e-57	0.341399	0.939	0.861	1.79997e-52
Uba2	1.09415e-56	0.360622	0.852	0.64	2.71939e-52
Ndufa5	1.78282e-56	0.355223	0.941	0.856	4.43101e-52
Apip	2.34118e-56	0.276622	0.665	0.324	5.81877e-52
Mrpl33	3.5076e-56	0.396044	0.893	0.731	8.71778e-52
Trim37	4.21965e-56	0.308195	0.716	0.391	1.04875e-51
Mzt1	4.35227e-56	0.384019	0.769	0.492	1.08171e-51
Sf3b5	1.22477e-55	0.342325	0.882	0.726	3.04403e-51
Rpl7	1.39239e-55	-0.256388	0.986	0.982	3.46065e-51
Hnrnpk	1.57593e-55	0.302865	0.97	0.95	3.91681e-51
Syncrip	1.58927e-55	0.360662	0.818	0.553	3.94998e-51
Orc2	2.40918e-55	0.284642	0.64	0.314	5.98778e-51
Slc24a5	2.84612e-55	0.323853	0.761	0.434	7.07376e-51
Ywhaq	3.33274e-55	0.334855	0.97	0.908	8.28319e-51
Ube2e3	1.10696e-54	0.33363	0.789	0.493	2.75123e-50
Nfyb	2.16115e-54	0.277685	0.687	0.354	5.37131e-50
Sod2	2.78365e-54	-0.381437	0.823	0.895	6.91848e-50
Cklf	4.64972e-54	0.257055	0.514	0.2	1.15564e-49
Mrpl13	5.44495e-54	0.319618	0.75	0.447	1.35329e-49
Tmem107	6.37329e-54	0.340468	0.89	0.724	1.58402e-49
Sfpq	2.19938e-53	0.393494	0.938	0.837	5.46634e-49
Khdrbs3	2.55212e-53	0.290318	0.686	0.379	6.34303e-49
Anapc5	3.37279e-53	0.310013	0.941	0.829	8.38274e-49
Acadl	4.28049e-53	0.269682	0.557	0.238	1.06387e-48
U2af1	4.79825e-53	0.33975	0.909	0.742	1.19256e-48
Ndufa2	1.07169e-52	0.319223	0.984	0.924	2.66358e-48
Ccdc25	1.67231e-52	0.278086	0.624	0.304	4.15637e-48
Ctsl	2.10362e-52	-0.355837	0.78	0.907	5.22833e-48
Fam216a	2.14787e-52	0.346625	0.904	0.743	5.33832e-48
Lnpk	2.24377e-52	0.255521	0.654	0.325	5.57668e-48
Oat	2.37311e-52	0.257139	0.708	0.385	5.89813e-48
Nono	2.74688e-52	0.326569	0.931	0.778	6.82709e-48
Snhg18	7.31657e-52	-0.480058	0.601	0.769	1.81846e-47
Ghrhr	8.74983e-52	-0.406396	0.608	0.861	2.17468e-47
Fzr1	1.46816e-51	0.256621	0.486	0.203	3.64896e-47
Smarcc1	1.83481e-51	0.342809	0.804	0.561	4.56023e-47
Set	3.13516e-51	0.332031	0.954	0.907	7.79212e-47
Supt16	4.65887e-51	0.378077	0.872	0.713	1.15792e-46
Srsf10	4.81737e-51	0.316222	0.914	0.752	1.19731e-46
Gpx4	5.7724e-51	0.330557	0.957	0.894	1.43467e-46
Lsm4	1.98537e-50	0.331687	0.856	0.633	4.93445e-46
Cep89	2.26337e-50	0.315891	0.53	0.235	5.62539e-46
Lcorl	3.05776e-50	0.331956	0.711	0.415	7.59975e-46
Nol7	4.34926e-50	0.334484	0.946	0.81	1.08097e-45
Hist1h1e	5.55307e-50	1.04018	0.515	0.289	1.38016e-45
Atp5o.1	5.80758e-50	0.339625	0.925	0.791	1.44342e-45
Gm47283	5.95562e-50	0.350113	0.766	0.491	1.48021e-45
Cep162	7.27169e-50	0.261772	0.585	0.266	1.80731e-45
Higd1a	9.33423e-50	0.384029	0.847	0.655	2.31993e-45
Tdp2	1.27552e-49	0.256945	0.636	0.321	3.17017e-45
Hnrnpdl	1.5062e-49	0.321133	0.944	0.867	3.74351e-45
Ndufb8	1.9974e-49	0.340884	0.927	0.792	4.96433e-45
Mrpl18	2.3954e-49	0.314125	0.758	0.488	5.95352e-45
Emd	2.72938e-49	0.350887	0.866	0.643	6.78361e-45
Tmsb4x	3.34826e-49	0.644295	0.906	0.74	8.32176e-45
Tmem158	3.93265e-49	0.259488	0.404	0.141	9.77421e-45
Pkm	5.27919e-49	0.361901	0.96	0.905	1.31209e-44
Oaz1	8.25704e-49	0.305758	0.994	0.976	2.0522e-44
Reep5	1.00514e-48	0.378745	0.917	0.769	2.49818e-44
Mrpl28	1.94688e-48	0.290552	0.799	0.569	4.83879e-44
Rfc1	2.06046e-48	0.469962	0.78	0.61	5.12107e-44
Mcub	4.27349e-48	0.345242	0.266	0.071	1.06213e-43
Crlf1	4.4674e-48	0.295195	0.523	0.237	1.11033e-43
Rpl38	4.55477e-48	-0.251361	0.99	0.989	1.13204e-43
Pbdc1	4.95658e-48	0.338741	0.833	0.591	1.23191e-43
Yaf2	6.3663e-48	0.289408	0.719	0.42	1.58228e-43
Cdk2ap1	8.39572e-48	0.319001	0.855	0.616	2.08667e-43
Meg3	1.01831e-47	-0.406523	0.943	0.984	2.53091e-43
Psmd13	1.22044e-47	0.340059	0.864	0.659	3.03328e-43
Ndufa4	2.0937e-47	0.339841	0.962	0.912	5.20368e-43
Tra2b	2.59931e-47	0.303438	0.938	0.856	6.46033e-43
Nsg1	2.98187e-47	0.328554	0.777	0.505	7.41114e-43
Ctxn1	4.6707e-47	0.332074	0.679	0.38	1.16086e-42
Serbp1	8.87744e-47	0.266854	0.974	0.943	2.2064e-42
Hist1h1c	9.69406e-47	0.596781	0.679	0.404	2.40936e-42
Etfa	9.97356e-47	0.328483	0.786	0.522	2.47883e-42
Mrpl51	1.02773e-46	0.299498	0.855	0.66	2.55432e-42
Rnps1	2.33578e-46	0.299818	0.892	0.718	5.80534e-42
Ppp1r2	3.83721e-46	0.300723	0.903	0.724	9.53699e-42
Hras	4.03233e-46	0.284395	0.855	0.623	1.0022e-41
B230219D22Rik	4.19983e-46	0.315679	0.922	0.851	1.04383e-41
Cisd2	4.35139e-46	0.300922	0.871	0.658	1.08149e-41
Akr1b3	5.91104e-46	0.290595	0.64	0.336	1.46913e-41
Rpl12	7.61172e-46	-0.281613	0.984	0.981	1.89182e-41
Acp1	9.02865e-46	0.291719	0.898	0.741	2.24398e-41
Rif1	1.17785e-45	0.355874	0.737	0.494	2.92744e-41
Hnrnph1	1.65302e-45	0.350771	0.915	0.803	4.10842e-41
Sumo2	3.09022e-45	0.354619	0.989	0.956	7.68043e-41
Atp5b	3.86229e-45	0.282041	0.973	0.951	9.59933e-41
Gabrb1	4.84044e-45	-0.367183	0.386	0.619	1.20304e-40
Kpnb1	5.61695e-45	0.253948	0.769	0.485	1.39604e-40
2007-09-01	5.79793e-45	0.317306	0.909	0.791	1.44102e-40
Fxyd6	6.27507e-45	0.374737	0.796	0.545	1.55961e-40
Ptp4a2	9.49918e-45	0.312621	0.856	0.66	2.36093e-40
Eif4e	1.02463e-44	0.284048	0.847	0.591	2.54661e-40
Hspa4l	1.07232e-44	0.313041	0.815	0.56	2.66514e-40
Med30	1.30774e-44	0.290651	0.657	0.383	3.25027e-40
Cd63	1.43658e-44	-0.310354	0.946	0.97	3.57048e-40
Cenpx	1.4517e-44	0.346562	0.796	0.572	3.60806e-40
Eny2	1.59738e-44	0.314279	0.923	0.791	3.97012e-40
Dazap1	1.68809e-44	0.283927	0.743	0.47	4.19558e-40
Cisd1	1.92106e-44	0.399634	0.836	0.646	4.77459e-40
Snrpc	2.79003e-44	0.316814	0.841	0.639	6.93434e-40
Taldo1	3.35819e-44	0.315814	0.82	0.566	8.34644e-40
Ppp1r14a	5.74171e-44	-0.398351	0.478	0.696	1.42704e-39
Meaf6	6.64965e-44	0.33154	0.751	0.513	1.6527e-39
Hes6	1.12297e-43	0.393462	0.697	0.414	2.79103e-39
Eif4g2	1.17264e-43	0.303421	0.965	0.924	2.91448e-39
Pnmal2	1.43262e-43	-0.339251	0.877	0.917	3.56062e-39
Tcerg1	1.54994e-43	0.269036	0.705	0.409	3.85222e-39
Vdac3	1.70865e-43	0.312698	0.928	0.789	4.24667e-39
Matr3	2.1893e-43	0.282371	0.923	0.865	5.44129e-39
Cacybp	2.56459e-43	0.294209	0.933	0.831	6.37402e-39
Dlk1	3.18106e-43	-0.300972	0.981	0.997	7.90621e-39
Atp5g2	6.0427e-43	0.279901	0.989	0.95	1.50185e-38
Erh	8.0252e-43	0.260345	0.742	0.432	1.99458e-38
Upf3b	9.68543e-43	0.290083	0.813	0.559	2.40722e-38
Pcbp2	1.22675e-42	0.26138	0.959	0.907	3.04897e-38
Fkbp3	1.96082e-42	0.359097	0.927	0.822	4.87342e-38
Tpr	2.26605e-42	0.304559	0.935	0.888	5.63203e-38
Rsph1	3.89029e-42	0.317951	0.464	0.212	9.66892e-38
Cox20	3.93495e-42	0.327505	0.801	0.553	9.77994e-38
Srsf1	4.76165e-42	0.287234	0.836	0.641	1.18346e-37
Tshz2	6.3951e-42	-0.35315	0.847	0.901	1.58944e-37
Ctbp1	7.37882e-42	0.265498	0.887	0.699	1.83393e-37
Ilf2	8.75161e-42	0.269042	0.909	0.785	2.17512e-37
Ascl1	1.46395e-41	0.549186	0.375	0.154	3.63849e-37
Nelfcd	1.79469e-41	0.277707	0.801	0.548	4.46052e-37
Eloc	3.92708e-41	0.27921	0.911	0.755	9.76037e-37
Khdrbs1	4.42782e-41	0.299328	0.903	0.754	1.10049e-36
Trim28	6.13347e-41	0.252918	0.756	0.509	1.52441e-36
Dynll1	6.84462e-41	0.527538	0.954	0.885	1.70116e-36
Uqcr10	9.08219e-41	0.277152	0.941	0.848	2.25729e-36
Trir	1.41781e-40	0.316497	0.892	0.835	3.52382e-36
Mat2a	1.74931e-40	0.287186	0.855	0.662	4.34772e-36
Pgam1	2.78314e-40	0.295751	0.944	0.859	6.91723e-36
Mdh1	3.78265e-40	0.269882	0.976	0.938	9.40141e-36
Ift74	4.67305e-40	0.255513	0.713	0.436	1.16144e-35
Mapre1	6.07201e-40	0.292477	0.828	0.617	1.50914e-35
Ddx39b	7.26782e-40	0.282249	0.944	0.84	1.80634e-35
Atg3	7.65405e-40	0.299756	0.716	0.445	1.90234e-35
Hnrnpul1	9.82579e-40	0.252613	0.823	0.574	2.4421e-35
Aes	2.5503e-39	0.318455	0.968	0.919	6.33852e-35
Hp1bp3	2.97891e-39	0.352946	0.893	0.787	7.40378e-35
Fuom	3.63887e-39	0.298278	0.781	0.538	9.04404e-35
Mettl9	4.49565e-39	0.273884	0.858	0.665	1.11735e-34
Mif	4.57546e-39	0.310142	0.949	0.856	1.13719e-34
Magoh	5.51646e-39	0.267407	0.829	0.603	1.37106e-34
Kdm5b	6.72925e-39	-0.328289	0.472	0.66	1.67249e-34
Ybx3	8.89648e-39	0.263393	0.738	0.471	2.21113e-34
Itm2c	1.07663e-38	-0.3112	0.821	0.897	2.67586e-34
Tpm3	2.06474e-38	0.299847	0.896	0.755	5.13169e-34
Kif2a	2.19921e-38	0.256157	0.766	0.511	5.46591e-34
Pnrc2	5.89147e-38	0.30123	0.687	0.43	1.46427e-33
Ndufb7	6.18198e-38	0.269909	0.947	0.848	1.53647e-33
Peg10	6.6958e-38	0.37743	0.566	0.293	1.66417e-33
Ndufab1	1.60264e-37	0.309179	0.92	0.787	3.98321e-33
Rabac1	1.69307e-37	-0.275881	0.885	0.927	4.20795e-33
Eif4a3	2.90473e-37	0.269676	0.861	0.676	7.21942e-33
Dnajc8	6.16081e-37	0.281663	0.879	0.756	1.53121e-32
Cenpc1	8.11039e-37	0.256162	0.64	0.382	2.01576e-32
Atp5g3	8.78498e-37	0.293865	0.96	0.877	2.18342e-32
Maged2	1.28753e-36	-0.306596	0.903	0.931	3.20002e-32
Cox5b	1.34514e-36	0.275335	0.971	0.907	3.34321e-32
Gnai2	1.36904e-36	0.285449	0.938	0.853	3.40261e-32
Minos1	3.28211e-36	0.291479	0.935	0.84	8.15736e-32
Bex2	4.63709e-36	0.264318	0.992	0.98	1.1525e-31
Snrpd2	6.93244e-36	0.273523	0.968	0.893	1.72299e-31
Tsen34	8.58619e-36	0.278775	0.841	0.643	2.13401e-31
Dynll2	1.32219e-35	0.290711	0.933	0.841	3.28618e-31
Phf5a	2.2545e-35	0.256753	0.861	0.649	5.60334e-31
Cox6c	2.61804e-35	0.258697	0.982	0.954	6.50689e-31
Baz1b	3.60156e-35	0.301181	0.837	0.649	8.95132e-31
Cct7	1.37497e-34	0.269384	0.949	0.893	3.41735e-30
Rem2	2.02113e-34	-0.262817	0.26	0.499	5.02332e-30
Six6	2.04099e-34	0.356286	0.721	0.478	5.07267e-30
Scg2	2.07608e-34	0.708772	0.928	0.876	5.15988e-30
Basp1	2.10252e-34	0.389223	0.721	0.5	5.2256e-30
Psmc4	4.23985e-34	0.25277	0.844	0.643	1.05377e-29
Ywhah	7.09323e-34	0.28848	0.879	0.737	1.76295e-29
Cmc2	9.28347e-34	0.278603	0.892	0.741	2.30731e-29
Erc2	9.39513e-34	-0.280373	0.284	0.494	2.33507e-29
Spint2	1.02061e-33	0.251883	0.978	0.971	2.53661e-29
H2afj	1.4337e-33	0.279413	0.844	0.651	3.56332e-29
Snu13	2.37782e-33	0.25711	0.923	0.833	5.90985e-29
Nap1l4	3.0536e-33	0.260194	0.86	0.666	7.58941e-29
Fam92a	3.91264e-33	0.260648	0.836	0.651	9.72448e-29
Pcp4	6.07926e-33	0.40971	0.553	0.32	1.51094e-28
Slc25a5	1.03999e-32	0.301251	0.925	0.822	2.5848e-28
Ptn	1.22199e-32	0.360882	0.764	0.55	3.03714e-28
Hsp90b1	1.29341e-32	0.308586	0.971	0.968	3.21465e-28
Chd3os	1.48464e-32	0.288392	0.568	0.351	3.68992e-28
Hnrnpr	1.50638e-32	0.256024	0.901	0.778	3.74396e-28
Vbp1	3.35346e-32	0.282873	0.855	0.707	8.33469e-28
Arl6ip6	4.44945e-32	0.258099	0.66	0.435	1.10587e-27
Stag1	6.78126e-32	0.25903	0.719	0.493	1.68541e-27
Uqcrq	7.9069e-32	0.260058	0.933	0.874	1.96518e-27
Dhx9	1.05724e-31	0.253585	0.855	0.699	2.62766e-27
Cst3	1.74373e-31	0.290754	0.986	0.979	4.33387e-27
Ppig	2.40087e-31	0.254987	0.917	0.814	5.96713e-27
Ubb	2.53516e-31	0.276288	0.995	0.995	6.30088e-27
Rtn3	3.19209e-31	0.252589	0.915	0.802	7.93363e-27
Pbrm1	3.76305e-31	0.254586	0.919	0.849	9.35268e-27
Gpr179	5.88476e-31	-0.250107	0.317	0.525	1.4626e-26
Caly	3.23227e-30	-0.319353	0.817	0.869	8.03348e-26
Ddx3x	3.3763e-30	0.257769	0.781	0.585	8.39146e-26
Rock1	4.08883e-30	0.254741	0.871	0.747	1.01624e-25
Morf4l2	5.27648e-30	0.256188	0.962	0.921	1.31142e-25
Use1	5.91758e-30	-0.252273	0.74	0.793	1.47075e-25
Sh3bgrl	6.28693e-30	0.272743	0.708	0.469	1.56255e-25
Brd8	6.88095e-30	0.266882	0.844	0.74	1.71019e-25
Hnrnpul2	1.06165e-29	0.255102	0.778	0.568	2.63862e-25
Rpn2	1.60151e-29	0.251769	0.925	0.835	3.9804e-25
Ndufa13	2.6828e-29	-0.259146	0.909	0.938	6.66784e-25
Prlr	2.97704e-29	-0.313674	0.713	0.816	7.39913e-25
Ndufaf3	3.16108e-29	0.324788	0.627	0.408	7.85655e-25
Rbp4	3.97354e-29	-0.288635	0.52	0.696	9.87583e-25
Ikbip	8.90423e-29	-0.290019	0.628	0.724	2.21306e-24
Bsg	9.25947e-29	0.260162	0.992	0.985	2.30135e-24
Gnb3	1.12477e-28	-0.306327	0.404	0.582	2.7955e-24
Kcnk2	1.35835e-28	-0.286588	0.628	0.759	3.37604e-24
Dusp26	1.49254e-28	-0.276296	0.589	0.72	3.70957e-24
Prelid3b	2.71925e-28	0.259549	0.777	0.56	6.75843e-24
Mxd4	2.82022e-28	-0.255888	0.6	0.712	7.00938e-24
Htatsf1	3.11937e-28	-0.285841	0.939	0.976	7.75289e-24
Pmepa1	3.56931e-28	0.255171	0.78	0.59	8.87115e-24
Rxrg	7.01775e-28	-0.279563	0.59	0.731	1.74419e-23
Irs4	7.97438e-28	0.27772	0.702	0.476	1.98195e-23
Sec61b	1.53975e-27	-0.303603	0.952	0.933	3.8269e-23
Scg3	1.62979e-27	0.318678	0.919	0.837	4.05067e-23
Rab4a	1.99219e-27	-0.265749	0.45	0.598	4.95138e-23
Tcf4	9.76259e-27	0.308944	0.82	0.665	2.42639e-22
Mien1	1.16661e-26	-0.253696	0.718	0.791	2.8995e-22
2610524H06Rik	3.26926e-26	0.258223	0.766	0.576	8.12543e-22
Atp6ap2	6.0093e-26	0.25033	0.898	0.784	1.49355e-21
Mt2	3.8138e-25	0.408081	0.759	0.589	9.47882e-21
Hmgn3	7.85029e-25	0.30715	0.885	0.744	1.95111e-20
Cwc15	5.16168e-24	0.254896	0.879	0.735	1.28288e-19
Xbp1	2.37969e-23	-0.253306	0.652	0.739	5.91447e-19
Grb10	6.06075e-23	-0.260052	0.485	0.652	1.50634e-18
Plpp3	1.35587e-22	-0.265325	0.321	0.481	3.36987e-18
Insm1	3.4373e-22	0.280598	0.833	0.697	8.54306e-18
Crip1	4.12124e-22	0.268	0.659	0.447	1.02429e-17
Klhl24	1.25145e-21	-0.250542	0.609	0.712	3.11034e-17
Stmn3	1.41944e-21	0.288941	0.665	0.47	3.52788e-17
Bag2	9.77864e-21	-0.253456	0.536	0.631	2.43038e-16
Pclo	1.4933e-18	-0.286631	0.722	0.774	3.71145e-14
Mest	9.8127e-18	0.288715	0.869	0.764	2.43885e-13
Malat1	9.11883e-17	-0.265297	0.96	0.989	2.26639e-12
Dnm3	2.00105e-16	-0.25284	0.494	0.594	4.9734e-12
Pcsk2	6.29621e-16	0.469696	0.402	0.23	1.56486e-11
Cdkn1c	4.06873e-15	-0.39401	0.49	0.562	1.01124e-10
H1f0	1.32345e-13	0.254006	0.772	0.63	3.28929e-09
Nenf	1.64891e-13	0.25539	0.892	0.85	4.0982e-09
Txnip	1.46019e-09	-0.255027	0.64	0.678	3.62915e-05
Apoe	1.87898e-09	-0.363544	0.563	0.614	4.67001e-05
Gm7967	1.08956e-08	-0.306481	0.376	0.465	0.0002708
Mt1	3.25246e-08	0.291252	0.919	0.826	0.000808366
Chgb	1.18895e-05	0.72482	0.965	0.96	0.295501
Tshb	6.80568e-05	1.6088	0.279	0.208	1
Btg2	0.00347054	-0.269651	0.939	0.948	1
Hist1h2bc	0.0771231	0.254126	0.845	0.885	1
Atf3	0.190702	-0.435747	0.467	0.39	1
Wfdc2	0.201528	0.313412	0.431	0.378	1

## Sheet: B
DEGs Prolif Cortico versus Cortico (neonatal AP)
Gene	p_val	avg_logFC	pct.1	pct.2	p_val_adj
Clspn	6.57e-101	0.664967	0.654	0.016	1.63e-96
Hells	1.53e-100	1.09757	0.942	0.062	3.81e-96
Uhrf1	1.86e-100	0.502402	0.635	0.014	4.62e-96
Brip1	7.07e-93	0.34605	0.481	0.005	1.76e-88
Mcm3	2.86e-90	1.00358	0.962	0.074	7.1e-86
Tcf19	2.65e-88	0.741487	0.846	0.05	6.58e-84
Brca1	2.5e-81	0.479914	0.577	0.018	6.2e-77
E2f1	7.67e-81	0.750946	0.846	0.061	1.91e-76
Dtl	1.82e-80	0.676639	0.654	0.029	4.52e-76
Top2a	2.01e-80	0.879553	0.635	0.026	5.01e-76
Cenpk	5.35e-73	0.800054	0.827	0.069	1.33e-68
Chaf1b	1.16e-72	0.514933	0.615	0.028	2.88e-68
Cdca7l	2.59e-70	0.453621	0.462	0.012	6.44e-66
Cdc6	3.21e-67	0.269225	0.404	0.008	7.97e-63
Cdk1	4.08e-66	0.488894	0.519	0.02	1.01e-61
Pclaf	2.52e-64	0.838972	0.538	0.024	6.27e-60
Mcm5	8.79e-63	0.88154	0.904	0.107	2.18e-58
Dscc1	1.97e-62	0.324778	0.423	0.012	4.9e-58
Cenpm	2.84e-62	0.499901	0.635	0.04	7.06e-58
Fam111a	2.19e-60	0.645726	0.827	0.085	5.43e-56
Exo1	8.57e-57	0.303824	0.404	0.013	2.13e-52
Fignl1	1.25e-56	0.278659	0.5	0.024	3.1e-52
Slfn9	1.92e-54	0.303167	0.308	0.005	4.77e-50
Rad51	1.01e-51	0.652123	0.712	0.074	2.5e-47
Cenph	5.1e-51	0.644302	0.615	0.051	1.27e-46
Pole	3.18e-49	0.267977	0.423	0.019	7.89e-45
Cdc45	4.71e-49	0.375732	0.558	0.042	1.17e-44
Kntc1	7.42e-49	0.263084	0.365	0.013	1.84e-44
Gins2	9.51e-49	0.650108	0.788	0.106	2.36e-44
Gmnn	1.23e-48	0.854465	0.808	0.116	3.06e-44
Mcm6	1.72e-48	1.12655	0.942	0.194	4.28e-44
Spc24	5.86e-48	0.672009	0.673	0.07	1.46e-43
Rad51ap1	3.04e-47	0.382843	0.481	0.03	7.55e-43
Pbk	6.08e-47	0.32741	0.346	0.012	1.51e-42
Lig1	4.69e-46	1.12294	0.942	0.207	1.16e-41
Tyms	4.88e-46	0.952369	0.846	0.141	1.21e-41
Pola1	1.27e-43	0.57471	0.731	0.097	3.16e-39
Atad2	3.27e-43	0.922247	0.731	0.108	8.14e-39
Nrm	6.73e-43	0.305921	0.481	0.034	1.67e-38
Ube2t	2.75e-42	0.374548	0.538	0.046	6.84e-38
Dhfr	6.37e-39	0.846512	0.827	0.166	1.58e-34
Prim1	3.02e-38	0.716452	0.808	0.152	7.5e-34
Cdca8	2.67e-37	0.271297	0.365	0.021	6.65e-33
Pold1	4.79e-37	0.285125	0.519	0.05	1.19e-32
Cenps	3.18e-36	0.528038	0.731	0.123	7.91e-32
Mms22l	7.49e-35	0.326272	0.462	0.042	1.86e-30
Chaf1a	9.61e-35	0.350223	0.481	0.047	2.39e-30
Nusap1	9.98e-35	0.264056	0.346	0.02	2.48e-30
Mcm7	4.54e-34	0.831635	0.865	0.213	1.13e-29
Chek1	9.54e-34	0.263584	0.462	0.042	2.37e-29
Pcna	2.1e-33	1.00822	0.942	0.326	5.21e-29
Tpx2	2.11e-33	0.291147	0.404	0.032	5.26e-29
Spc25	6.35e-33	0.271081	0.346	0.022	1.58e-28
Gins1	1.04e-31	0.317682	0.404	0.035	2.57e-27
Mcm2	6.39e-31	0.59803	0.865	0.218	1.59e-26
Rfc4	1.16e-29	0.604188	0.769	0.177	2.88e-25
Rrm1	1.52e-29	0.685134	0.865	0.264	3.79e-25
Ccne2	5.54e-29	0.397436	0.519	0.069	1.38e-24
Topbp1	2.67e-28	0.543535	0.808	0.201	6.63e-24
Tubb5	4.48e-28	1.15456	1	0.855	1.11e-23
Zfp367	6.19e-28	0.587823	0.673	0.142	1.54e-23
Rpa2	7.57e-28	0.786631	0.923	0.353	1.88e-23
Wdr76	2.95e-27	0.355949	0.5	0.068	7.33e-23
Birc5	7.15e-27	0.261121	0.269	0.016	1.78e-22
Hmgb2	5.7e-26	1.29754	0.981	0.685	1.42e-21
Fen1	6.89e-25	0.493912	0.75	0.186	1.71e-20
Tipin	9.18e-25	0.722246	0.904	0.346	2.28e-20
Hat1	9.55e-25	0.820598	0.904	0.409	2.37e-20
Smc2	3.42e-24	0.688487	0.75	0.195	8.5e-20
Mybl1	5.5e-24	0.325279	0.442	0.059	1.37e-19
Mcm4	6.99e-24	0.592265	0.75	0.213	1.74e-19
Ncapd2	4.18e-23	0.269336	0.481	0.072	1.04e-18
Brca2	4.71e-23	0.346486	0.5	0.084	1.17e-18
Brip1os	5.77e-23	0.330961	0.596	0.114	1.43e-18
Atad5	5.84e-23	0.399149	0.577	0.112	1.45e-18
Mad2l1	7.31e-23	0.30834	0.423	0.057	1.82e-18
Dut	8.14e-23	0.982639	0.962	0.693	2.02e-18
Ncapg2	2.95e-22	0.394828	0.5	0.089	7.33e-18
Dtymk	9.61e-22	0.809485	0.942	0.532	2.39e-17
Tuba1b	9.97e-22	0.880814	1	0.789	2.48e-17
Cks1b	1.6e-21	0.486584	0.769	0.225	3.97e-17
Dek	2.01e-21	0.859774	0.981	0.784	4.99e-17
Dnph1	1.36e-20	0.327293	0.615	0.132	3.39e-16
Dnmt1	2.43e-20	0.649739	0.904	0.377	6.03e-16
Ezh2	2.72e-20	0.501533	0.635	0.153	6.76e-16
Siva1	1.23e-19	0.713759	0.846	0.368	3.07e-15
Stmn1	1.68e-19	0.826968	1	0.964	4.17e-15
Nasp	2.57e-19	0.773475	0.942	0.582	6.4e-15
Ran	3.57e-19	0.554813	1	0.911	8.86e-15
Mns1	4.25e-19	0.310497	0.462	0.082	1.06e-14
Cdt1	4.74e-19	0.274488	0.365	0.051	1.18e-14
Pold2	6.32e-19	0.329558	0.673	0.18	1.57e-14
Slbp	9.69e-19	0.711542	0.942	0.514	2.41e-14
Timeless	1.07e-18	0.481022	0.596	0.144	2.67e-14
Prim2	2.72e-18	0.262396	0.5	0.099	6.77e-14
Ptma	3.04e-18	0.659683	1	0.994	7.55e-14
Cenpw	5.52e-18	0.448315	0.577	0.14	1.37e-13
Rpa1	5.73e-18	0.37248	0.635	0.168	1.42e-13
Ncapd3	9.15e-18	0.47171	0.769	0.258	2.27e-13
Rbbp8	3.31e-17	0.321609	0.519	0.114	8.23e-13
Zgrf1	4.15e-17	0.278903	0.423	0.077	1.03e-12
Mdc1	5.59e-17	0.30249	0.538	0.12	1.39e-12
Ranbp1	6.86e-17	0.560313	1	0.829	1.7e-12
H2afv	6.93e-17	0.713276	0.981	0.88	1.72e-12
Lmnb1	2.25e-16	0.441167	0.615	0.175	5.59e-12
Rfc2	2.33e-16	0.561416	0.942	0.579	5.79e-12
Umps	3.11e-16	0.279381	0.577	0.153	7.73e-12
Dnajc9	3.5e-16	0.571255	0.962	0.625	8.69e-12
Psmc3ip	7.62e-16	0.425067	0.596	0.161	1.89e-11
Mki67	1.5e-15	0.576885	0.308	0.046	3.73e-11
Smc4	2.45e-15	0.595641	0.827	0.403	6.1e-11
Chd3os	3.57e-15	0.473997	0.846	0.374	8.88e-11
H2afz	4.95e-15	0.550426	1	0.985	1.23e-10
Jpt2	5.46e-15	0.331584	0.615	0.186	1.36e-10
Hnrnpab	6.12e-15	0.525552	0.981	0.815	1.52e-10
Pmf1	6.78e-15	0.282755	0.558	0.152	1.69e-10
Arl6ip6	1.44e-14	0.481836	0.923	0.435	3.58e-10
Ctps	1.88e-14	0.348484	0.654	0.203	4.68e-10
Tubg1	2e-14	0.476337	0.827	0.381	4.98e-10
Gsr	2.52e-14	0.301855	0.769	0.272	6.27e-10
Haus1	6.23e-14	0.303397	0.558	0.162	1.55e-09
Tmpo	1.29e-13	0.583003	0.788	0.373	3.2e-09
Nop56	1.29e-13	0.48832	0.942	0.618	3.2e-09
Cntln	1.58e-13	0.423255	0.827	0.371	3.91e-09
Cks2	1.69e-13	0.300765	0.462	0.116	4.2e-09
Casp8ap2	4.86e-13	0.453342	0.75	0.321	1.21e-08
Ssrp1	6.03e-13	0.488452	0.942	0.693	1.5e-08
Nmral1	7.41e-13	0.372859	0.692	0.259	1.84e-08
Alkbh2	1.15e-12	0.273204	0.519	0.149	2.87e-08
Dctpp1	1.19e-12	0.430478	0.712	0.286	2.96e-08
Rnaseh2c	2.62e-12	0.4694	0.865	0.449	6.52e-08
Lockd	3.29e-12	0.300682	0.615	0.201	8.17e-08
Rbmx2	3.4e-12	0.293362	0.596	0.205	8.46e-08
Rfc3	3.93e-12	0.53932	0.942	0.596	9.76e-08
Lsm2	4.87e-12	0.403485	0.885	0.468	1.21e-07
Zmynd19	7.11e-12	0.274289	0.635	0.217	1.77e-07
Idh2	8.03e-12	0.352796	0.827	0.407	1.99e-07
Orc6	8.95e-12	0.360651	0.788	0.354	2.22e-07
Snrpd1	1.07e-11	0.479198	0.942	0.815	2.66e-07
Tex30	1.08e-11	0.287977	0.577	0.197	2.69e-07
Smc6	1.18e-11	0.573143	0.904	0.653	2.94e-07
Nsmce4a	1.36e-11	0.472658	0.962	0.692	3.38e-07
Atm	1.67e-11	0.334431	0.654	0.242	4.14e-07
Cnih2	1.9e-11	0.393332	0.808	0.375	4.73e-07
Orc2	1.9e-11	0.380219	0.75	0.353	4.73e-07
Msh2	2.7e-11	0.354608	0.769	0.373	6.71e-07
1810037I17Rik	3.57e-11	0.366431	1	0.951	8.88e-07
Cenpq	4.8e-11	0.306341	0.577	0.2	1.19e-06
Racgap1	6.51e-11	0.371541	0.596	0.225	1.62e-06
Eri1	6.68e-11	0.266177	0.5	0.153	1.66e-06
Etaa1	7.82e-11	0.298965	0.481	0.15	1.94e-06
Fxyd6	8.01e-11	0.381622	0.692	0.307	1.99e-06
Anp32b	8.3e-11	0.396428	1	0.935	2.06e-06
Nfib	8.44e-11	0.26699	0.558	0.19	2.1e-06
Ung	9.88e-11	0.31263	0.731	0.304	2.46e-06
Nap1l1	2.38e-10	0.442129	0.962	0.874	5.91e-06
Ybx1	2.42e-10	0.363233	1	0.958	6.01e-06
Alyref	2.65e-10	0.417075	0.942	0.605	6.59e-06
Ipo9	2.87e-10	0.298488	0.577	0.201	7.13e-06
Rnf168	3.26e-10	0.392326	0.635	0.276	8.11e-06
Rpa3	3.78e-10	0.286876	0.635	0.257	9.4e-06
Paics	4.71e-10	0.366273	0.885	0.523	1.17e-05
Hirip3	6.95e-10	0.366697	0.808	0.395	1.73e-05
Rnaseh2a	1.1e-09	0.296231	0.692	0.304	2.73e-05
Lsm8	1.41e-09	0.401168	0.846	0.542	3.52e-05
Hmgb1	1.49e-09	0.406269	0.981	0.951	3.7e-05
Ppia	1.87e-09	0.29109	1	0.999	4.65e-05
Snrpe	2.3e-09	0.342648	1	0.907	5.71e-05
Usp1	2.52e-09	0.467857	0.712	0.375	6.25e-05
Rfc1	3.47e-09	0.438823	0.846	0.55	8.63e-05
Nudc	4.31e-09	0.410662	0.981	0.839	0.000107175
Ssna1	5.45e-09	0.32398	0.923	0.616	0.0001354
Pgp	5.56e-09	0.442057	0.904	0.62	0.00013822
Pold3	5.62e-09	0.31291	0.654	0.3	0.000139698
Ndufaf2	7.85e-09	0.288448	0.75	0.377	0.000195125
Erh	8.22e-09	0.27237	0.808	0.431	0.000204331
Lsm3	1.08e-08	0.259883	0.923	0.656	0.000268874
Gins4	1.12e-08	0.306882	0.673	0.292	0.000278979
Hjurp	1.14e-08	0.383102	0.827	0.513	0.000282488
Ncl	1.67e-08	0.381021	1	0.931	0.000414064
Bag4	1.68e-08	0.251233	0.712	0.328	0.000417269
Prdx4	1.86e-08	0.258162	0.962	0.764	0.00046333
Hnrnpf	2.15e-08	0.32684	0.981	0.832	0.000535222
Hsp90aa1	2.32e-08	0.370877	1	0.957	0.000577758
Smc3	2.44e-08	0.37924	0.942	0.721	0.000607281
Slf1	2.5e-08	0.339781	0.615	0.273	0.000620108
Tubb4b	2.59e-08	0.454551	0.981	0.879	0.000643339
H1fx	3.18e-08	0.359287	0.904	0.591	0.000789722
Aldoa	4.24e-08	-0.408548	0.981	0.975	0.00105478
Selenoh	4.46e-08	0.380279	0.827	0.607	0.00110895
Cbx5	9.07e-08	0.350201	0.981	0.864	0.00225336
Srsf2	1e-07	0.349798	0.981	0.806	0.00248587
Cox7a2l	1.16e-07	-0.314572	1	0.964	0.00287819
Anp32e	1.22e-07	0.306058	0.904	0.643	0.00302596
Nsd2	1.43e-07	0.415381	0.808	0.462	0.00356484
Nelfe	1.43e-07	0.30261	0.808	0.565	0.0035501
Hint1	1.44e-07	0.268096	1	0.978	0.00357804
Psip1	1.47e-07	0.313017	1	0.903	0.00366175
Sae1	1.5e-07	0.324935	0.808	0.5	0.00373324
Hspa14	1.62e-07	0.302735	0.808	0.449	0.00403366
Suz12	1.67e-07	0.339364	0.788	0.441	0.00415617
Smchd1	1.7e-07	0.365171	0.865	0.615	0.00422897
Cdkn1a	1.75e-07	0.304467	0.692	0.342	0.00435914
Meaf6	1.75e-07	0.292594	0.788	0.465	0.00435089
Snrpb	1.85e-07	0.30233	1	0.902	0.00458582
Rangap1	1.9e-07	0.275801	0.596	0.296	0.00472754
Psmg2	2.05e-07	0.275478	0.75	0.365	0.00508729
Rbmxl1	2.08e-07	0.28118	0.846	0.481	0.00516417
2610524H06Rik	2.15e-07	0.325321	0.846	0.522	0.00533885
Ppm1g	2.31e-07	0.372958	0.865	0.653	0.00574119
Fsd1l	2.81e-07	0.252215	0.654	0.327	0.00697407
Slc25a5	2.93e-07	0.296792	0.981	0.824	0.00727677
Pdxp	3.96e-07	0.329987	0.692	0.373	0.00984527
Ccdc82	4.24e-07	0.29666	0.596	0.279	0.0105491
Tfdp1	4.34e-07	0.259746	0.596	0.278	0.0107989
Tesc	4.97e-07	0.250146	0.692	0.35	0.0123489
Stub1	5.12e-07	0.304608	0.962	0.914	0.0127185
Yeats4	7.28e-07	0.268692	0.904	0.625	0.0180887
Arpp19	8.27e-07	0.277431	0.981	0.771	0.0205534
Nsmce1	8.46e-07	0.347479	0.885	0.628	0.0210349
Cfap77	9.03e-07	0.256239	0.673	0.337	0.0224484
Smc1a	9.98e-07	0.356134	0.904	0.684	0.024799
Vegfb	9.98e-07	0.252603	0.692	0.387	0.0247966
Hnrnpd	1.02e-06	0.313517	0.942	0.872	0.0252717
Rbm3	1.36e-06	0.274971	0.981	0.947	0.033688
Cacybp	1.37e-06	0.283669	0.981	0.863	0.0340806
Banf1	1.7e-06	0.250892	0.865	0.71	0.0423048
Smarcc1	1.87e-06	0.274037	0.788	0.473	0.0463782
Fuom	1.92e-06	0.306392	0.923	0.693	0.0476741
Isoc1	2.38e-06	0.256205	0.635	0.34	0.0591908
Supt16	2.45e-06	0.351903	0.885	0.646	0.0609743
Rif1	2.88e-06	0.34472	0.827	0.525	0.071667
Cisd1	2.92e-06	0.266211	0.981	0.899	0.0725821
H3f3b	3.83e-06	-0.333881	1	0.997	0.0951047
Pa2g4	3.89e-06	0.28556	0.885	0.622	0.096779
Eif4a1	4.61e-06	0.251833	1	0.937	0.114613
Impdh2	5.14e-06	0.264342	0.615	0.35	0.127815
Hmgn2	5.78e-06	0.301231	0.981	0.858	0.143669
Hpf1	6.25e-06	0.340309	0.885	0.69	0.155367
Cmc2	6.69e-06	0.280122	0.75	0.469	0.166336
Hnrnpa3	7.29e-06	0.291345	0.981	0.921	0.181221
Rnps1	1.18e-05	0.271737	0.923	0.71	0.293009
Gm1673	1.18e-05	0.270155	0.923	0.835	0.294273
Sf3b5	1.24e-05	0.267319	0.942	0.819	0.309229
Cenpx	1.37e-05	0.267216	0.923	0.735	0.339957
Cdk4	1.44e-05	0.273966	0.962	0.79	0.35769
Rbbp7	1.8e-05	0.256534	0.962	0.796	0.447161
Camk2n2	2.49e-05	0.298587	0.885	0.585	0.61996
Hlf	2.71e-05	0.281681	0.769	0.497	0.673442
Gm47283	2.76e-05	0.325618	0.808	0.537	0.685609
Pmm1	2.94e-05	0.283682	0.654	0.387	0.731001
Itgb3bp	3.17e-05	0.251513	0.596	0.352	0.789076
Nt5dc2	3.29e-05	0.262315	0.981	0.81	0.818666
Mphosph8	3.34e-05	0.262954	0.885	0.652	0.830806
Mthfd2	3.42e-05	0.295223	0.846	0.559	0.848792
Tsen34	3.57e-05	0.284421	0.923	0.816	0.887391
Gmps	3.97e-05	0.254159	0.904	0.713	0.986977
Hdgf	6.79e-05	0.254549	0.981	0.81	1
Raly	6.8e-05	0.264939	0.885	0.742	1
Hnrnpu	7.69e-05	0.321843	0.981	0.856	1
Baz1b	8.09e-05	0.2587	0.788	0.615	1
Ndufa6	9.33e-05	-0.255872	0.981	0.965	1
Srsf10	0.000107923	0.287272	0.923	0.774	1
Rpl22	0.000114013	-0.298536	0.962	0.958	1
Kdm5b	0.000171084	-0.3258	0.442	0.6	1
Dnajc12	0.00017483	-0.261536	0.135	0.357	1
Mt2	0.000198024	-0.648967	0.865	0.906	1
Lrrc10b	0.000223083	0.256014	0.692	0.438	1
Cbx1	0.000267922	0.268021	0.904	0.737	1
Cltb	0.000348655	0.254073	0.923	0.808	1
Hist1h2bc	0.000464728	-0.534367	0.519	0.682	1
Atraid	0.000508261	-0.270855	0.904	0.928	1
Atox1	0.000516303	-0.327411	0.712	0.752	1
Tcerg1	0.00060309	0.272588	0.596	0.391	1
Mien1	0.000861894	-0.29415	0.827	0.847	1
Rabac1	0.000893484	-0.263345	0.962	0.936	1
Ubxn4	0.00100761	-0.267129	0.808	0.84	1
Taf1	0.00104239	0.271495	0.673	0.53	1
Gnas	0.00123457	-0.253107	1	1	1
Sec61b	0.00146903	-0.282935	0.942	0.954	1
Ctsl	0.00199438	-0.266989	0.788	0.868	1
Churc1	0.00222139	-0.278694	0.846	0.795	1
Ppdpf	0.00234872	-0.272576	0.788	0.825	1
Mcl1	0.00240694	-0.289463	0.635	0.706	1
Mt1	0.00261162	-0.530406	0.962	0.972	1
Svip	0.00274722	-0.272764	0.827	0.81	1
Blcap	0.00319898	-0.286308	0.5	0.588	1
Sat1	0.00338132	-0.357202	0.288	0.443	1
H2afx	0.00361425	0.283734	0.615	0.421	1
Kdm6b	0.00481704	-0.2568	0.538	0.616	1
Nnat	0.00548383	-0.301239	1	0.994	1
Ywhag	0.00630693	-0.268083	0.692	0.743	1
Ranbp2	0.00723205	0.320261	0.788	0.644	1
2011-09-01	0.0119976	-0.257429	0.654	0.732	1
Ier2	0.0120924	-0.471359	0.962	0.874	1
Junb	0.0184008	-0.290611	1	0.979	1
Smim22	0.0213323	-0.286675	0.577	0.579	1
Tsc22d1	0.0264981	-0.435264	0.942	0.904	1
Klf9	0.0327383	-0.263581	0.769	0.767	1
Socs3	0.0333886	-0.452198	0.519	0.591	1
Atp1a2	0.0353497	-0.287068	0.75	0.768	1
Zfp36	0.0373553	-0.42041	0.692	0.712	1
Lhfpl5	0.0421974	-0.259025	0.635	0.683	1
Meg3	0.059801	-0.25325	0.981	0.924	1
Bhlhe40	0.0676183	-0.270504	0.712	0.746	1
Hspa1a	0.0711924	0.401526	0.327	0.223	1
Fos	0.0823565	-0.382359	0.942	0.934	1
Hbb-bs	0.110117	-0.813684	0.365	0.234	1
Ascl1	0.126477	-0.289959	0.827	0.783	1
Egr2	0.182247	-0.294501	0.596	0.622	1
Nfkbia	0.343724	-0.327146	0.731	0.639	1
C2cd4b	0.346181	-0.351163	0.596	0.552	1
Txnip	0.353142	-0.252101	0.615	0.622	1
Gadd45b	0.396866	-0.480824	0.558	0.513	1
Ppp1r15a	0.448065	-0.261922	0.5	0.514	1
Atf3	0.780272	-0.5543	0.577	0.474	1
Cdkn1c	0.811907	-0.265296	0.327	0.285	1
Gh	0.838139	0.39062	0.269	0.258	1

## Sheet: C
GO analysis of genes upregulated in Prolif Pou1f1+ cells versus Somato (neonatal AP)
Pathway name	#Entities found	#Entities total	Entities ratio	Entities pValue	Entities FDR	-log10(FDR)
G1/S-Specific Transcription	25	43	0.0030131	1.11022e-16	4.21885e-15	14.3748
Amplification of signal from the kinetochores	51	94	0.00658678	1.11022e-16	4.21885e-15	14.3748
Amplification of signal from unattached kinetochores via a MAD2 inhibitory signal	51	94	0.00658678	1.11022e-16	4.21885e-15	14.3748
Resolution of Sister Chromatid Cohesion	68	134	0.00938967	1.11022e-16	4.21885e-15	14.3748
Deposition of new CENPA-containing nucleosomes at the centromere	27	54	0.0037839	1.11022e-16	4.21885e-15	14.3748
Nucleosome assembly	27	54	0.0037839	1.11022e-16	4.21885e-15	14.3748
Mitotic Spindle Checkpoint	55	111	0.00777801	1.11022e-16	4.21885e-15	14.3748
Processing of Capped Intron-Containing Pre-mRNA	58	256	0.0179385	1.11022e-16	4.21885e-15	14.3748
G1/S Transition	57	150	0.0105108	1.11022e-16	4.21885e-15	14.3748
DNA strand elongation	24	38	0.00266274	1.11022e-16	4.21885e-15	14.3748
mRNA Splicing	50	196	0.0137341	1.11022e-16	4.21885e-15	14.3748
DNA Replication	56	174	0.0121926	1.11022e-16	4.21885e-15	14.3748
Mitotic G1 phase and G1/S transition	64	173	0.0121225	1.11022e-16	4.21885e-15	14.3748
S Phase	59	180	0.012613	1.11022e-16	4.21885e-15	14.3748
Mitotic Prometaphase	91	211	0.0147852	1.11022e-16	4.21885e-15	14.3748
Mitotic G2-G2/M phases	64	214	0.0149954	1.11022e-16	4.21885e-15	14.3748
G2/M Transition	62	212	0.0148553	1.11022e-16	4.21885e-15	14.3748
mRNA Splicing - Major Pathway	49	185	0.0129634	1.11022e-16	4.21885e-15	14.3748
Cell Cycle, Mitotic	207	596	0.041763	1.11022e-16	4.21885e-15	14.3748
Synthesis of DNA	42	133	0.0093196	1.11022e-16	4.21885e-15	14.3748
Chromosome Maintenance	49	138	0.00966996	1.11022e-16	4.21885e-15	14.3748
Cell Cycle	232	734	0.051433	1.11022e-16	4.21885e-15	14.3748
M Phase	128	416	0.02915	1.11022e-16	4.21885e-15	14.3748
Separation of Sister Chromatids	74	195	0.0136641	1.11022e-16	4.21885e-15	14.3748
G2/M Checkpoints	44	154	0.0107911	1.11022e-16	4.21885e-15	14.3748
Mitotic Metaphase and Anaphase	87	250	0.017518	1.11022e-16	4.21885e-15	14.3748
Mitotic Anaphase	86	249	0.017448	1.11022e-16	4.21885e-15	14.3748
Cell Cycle Checkpoints	104	280	0.0196202	1.11022e-16	4.21885e-15	14.3748
EML4 and NUDC in mitotic spindle formation	60	121	0.00847873	1.11022e-16	4.21885e-15	14.3748
RHO GTPases Activate Formins	63	149	0.0104408	1.11022e-16	4.21885e-15	14.3748
Signaling by Rho GTPases	103	709	0.0496812	1.11022e-16	4.21885e-15	14.3748
RHO GTPase Effectors	85	326	0.0228435	1.11022e-16	4.21885e-15	14.3748
Signaling by Rho GTPases, Miro GTPases and RHOBTB3	103	725	0.0508023	1.11022e-16	4.21885e-15	14.3748
Recruitment of NuMA to mitotic centrosomes	33	97	0.006797	5.55112e-16	2.05391e-14	13.6874
DNA Replication Pre-Initiation	36	120	0.00840866	1.11022e-15	3.9968e-14	13.3983
AURKA Activation by TPX2	28	74	0.00518534	7.10543e-15	2.4869e-13	12.6043
Regulation of PLK1 Activity at G2/M Transition	30	92	0.00644664	3.4639e-14	1.17772e-12	11.929
Polo-like kinase mediated events	17	23	0.00161166	4.80727e-14	1.5864e-12	11.7996
Activation of the pre-replicative complex	20	36	0.0025226	5.44009e-14	1.74083e-12	11.7592
DNA Double-Strand Break Repair	39	168	0.0117721	2.29927e-13	6.93445e-12	11.159
Activation of ATR in response to replication stress	20	39	0.00273281	2.31148e-13	6.93445e-12	11.159
Homology Directed Repair	34	130	0.00910938	3.24074e-13	9.72222e-12	11.0122
Recruitment of mitotic centrosome proteins and complexes	27	81	0.00567585	3.98237e-13	1.15489e-11	10.9375
HDR through Homologous Recombination (HRR) or Single Strand Annealing (SSA)	33	124	0.00868895	4.55302e-13	1.27485e-11	10.8945
Centrosome maturation	27	83	0.00581599	6.93667e-13	1.94227e-11	10.7117
Loss of proteins required for interphase microtubule organization from the centrosome	25	71	0.00497512	9.17266e-13	2.47662e-11	10.6061
Loss of Nlp from mitotic centrosomes	25	71	0.00497512	9.17266e-13	2.47662e-11	10.6061
Kinesins	24	68	0.00476491	2.48535e-12	6.4619e-11	10.1896
Cellular Senescence	41	200	0.0140144	2.70728e-12	7.03892e-11	10.1525
Recognition of DNA damage by PCNA-containing replication complex	17	30	0.00210217	3.07165e-12	7.67914e-11	10.1147
Lagging Strand Synthesis	16	26	0.00182188	3.9837e-12	9.56089e-11	10.0195
G2/M DNA damage checkpoint	25	81	0.00567585	1.474e-11	3.5376e-10	9.45129
Telomere Maintenance	29	111	0.00777801	1.82143e-11	4.18929e-10	9.37786
Transcriptional Regulation by E2F6	19	46	0.00322332	3.51611e-11	7.77816e-10	9.10912
Anchoring of the basal body to the plasma membrane	27	99	0.00693715	3.53553e-11	7.77816e-10	9.10912
HDR through Homologous Recombination (HRR)	23	72	0.0050452	4.92963e-11	1.08452e-09	8.96476
Gap-filling DNA repair synthesis and ligation in GG-NER	15	27	0.00189195	7.54694e-11	1.66033e-09	8.77981
PCNA-Dependent Long Patch Base Excision Repair	14	23	0.00161166	1.00071e-10	2.10149e-09	8.67747
DNA Repair	56	380	0.0266274	1.07498e-10	2.25746e-09	8.64638
Processing of DNA double-strand break ends	25	90	0.0063065	1.28924e-10	2.70739e-09	8.56745
Meiosis	25	92	0.00644664	2.01402e-10	4.02804e-09	8.39491
Assembly of the pre-replicative complex	26	102	0.00714736	3.34048e-10	6.68096e-09	8.17516
G0 and Early G1	16	38	0.00266274	9.35301e-10	1.77707e-08	7.7503
Regulation of mitotic cell cycle	24	92	0.00644664	1.01748e-09	1.93322e-08	7.71372
APC/C-mediated degradation of cell cycle proteins	24	92	0.00644664	1.01748e-09	1.93322e-08	7.71372
Transcriptional Regulation by TP53	63	487	0.0341251	1.19168e-09	2.2642e-08	7.64509
Telomere C-strand (Lagging Strand) Synthesis	18	51	0.00357368	1.32992e-09	2.39385e-08	7.6209
Cilium Assembly	37	210	0.0147152	1.86031e-09	3.34855e-08	7.47514
Nuclear Envelope (NE) Reassembly	23	88	0.00616635	2.18101e-09	3.92581e-08	7.40607
SUMOylation	35	192	0.0134539	2.1842e-09	3.93156e-08	7.40544
Termination of translesion DNA synthesis	15	35	0.00245253	2.46254e-09	4.18633e-08	7.37817
Leading Strand Synthesis	11	16	0.00112115	2.91295e-09	4.66072e-08	7.33155
Polymerase switching	11	16	0.00112115	2.91295e-09	4.66072e-08	7.33155
Condensation of Prophase Chromosomes	18	55	0.00385397	4.21759e-09	6.74815e-08	7.17082
Extension of Telomeres	20	69	0.00483498	4.45626e-09	7.13002e-08	7.14691
Apoptosis induced DNA fragmentation	10	13	0.000910938	5.33731e-09	8.00597e-08	7.09659
Switching of origins to a post-replicative state	23	93	0.00651671	6.00719e-09	9.01079e-08	7.04524
Mitotic Prophase	28	135	0.00945974	6.15097e-09	9.22646e-08	7.03496
Resolution of AP sites via the multiple-nucleotide patch replacement pathway	14	32	0.00224231	6.45396e-09	9.68093e-08	7.01408
DNA Damage/Telomere Stress Induced Senescence	20	71	0.00497512	7.12062e-09	1.00651e-07	6.99718
Homologous DNA Pairing and Strand Exchange	16	44	0.00308318	7.18935e-09	1.00651e-07	6.99718
DNA Damage Bypass	18	57	0.00399411	7.24081e-09	1.01371e-07	6.99408
SUMO E3 ligases SUMOylate target proteins	33	183	0.0128232	8.09355e-09	1.1331e-07	6.94573
Meiotic recombination	18	58	0.00406419	9.40805e-09	1.31713e-07	6.88037
Gene and protein expression by JAK-STAT signaling after Interleukin-12 stimulation	20	73	0.00511527	1.1199e-08	1.56786e-07	6.80469
Diseases of programmed cell death	22	90	0.0063065	1.56583e-08	2.03558e-07	6.69131
Processive synthesis on the lagging strand	11	19	0.00133137	1.66008e-08	2.15811e-07	6.66593
Translesion synthesis by REV1	11	19	0.00133137	1.66008e-08	2.15811e-07	6.66593
COPI-dependent Golgi-to-ER retrograde traffic	24	107	0.00749772	1.76033e-08	2.28843e-07	6.64046
The role of GTSE1 in G2/M progression after G2 checkpoint	21	83	0.00581599	1.86049e-08	2.41864e-07	6.61643
Presynaptic phase of homologous DNA pairing and strand exchange	15	41	0.00287296	1.94794e-08	2.53232e-07	6.59648
Organelle biogenesis and maintenance	47	338	0.0236844	2.00441e-08	2.60574e-07	6.58407
Base Excision Repair	23	100	0.00700722	2.22249e-08	2.66699e-07	6.57398
Translesion synthesis by POLI	11	20	0.00140144	2.77627e-08	3.33152e-07	6.47736
Translesion synthesis by POLK	11	21	0.00147152	4.5169e-08	5.42029e-07	6.26598
Cyclin A/B1/B2 associated events during G2/M transition	13	32	0.00224231	5.19664e-08	6.23596e-07	6.2051
Reproduction	25	123	0.00861888	5.77557e-08	6.93068e-07	6.15922
Defective pyroptosis	16	52	0.00364375	6.9249e-08	8.30988e-07	6.08041
Cyclin A:Cdk2-associated events at S phase entry	21	90	0.0063065	7.10847e-08	8.53016e-07	6.06904
HDR through Single Strand Annealing (SSA)	14	39	0.00273281	7.22081e-08	8.66498e-07	6.06223
RNA Polymerase II Transcription Termination	18	67	0.00469484	7.963e-08	9.36751e-07	6.02838
Senescence-Associated Secretory Phenotype (SASP)	21	91	0.00637657	8.51592e-08	9.36751e-07	6.02838
Regulation of APC/C activators between G1/S and early anaphase	20	83	0.00581599	8.73523e-08	9.60876e-07	6.01733
Cellular responses to stimuli	95	970	0.06797	8.87058e-08	9.75764e-07	6.01066
Interleukin-12 signaling	20	84	0.00588606	1.05441e-07	1.15985e-06	5.9356
Removal of the Flap Intermediate	10	18	0.0012613	1.07845e-07	1.18629e-06	5.92581
Aggrephagy	15	47	0.00329339	1.11401e-07	1.22541e-06	5.91172
Dual Incision in GG-NER	14	41	0.00287296	1.31428e-07	1.4457e-06	5.83992
Translesion synthesis by Y family DNA polymerases bypasses lesions on DNA template	15	48	0.00336346	1.45208e-07	1.59729e-06	5.79662
Golgi-to-ER retrograde transport	27	148	0.0103707	1.45493e-07	1.60043e-06	5.79576
Translesion Synthesis by POLH	11	24	0.00168173	1.68924e-07	1.68924e-06	5.77231
Regulation of TP53 Activity through Phosphorylation	21	95	0.00665686	1.71119e-07	1.71119e-06	5.7667
RHO GTPases activate IQGAPs	13	36	0.0025226	1.96382e-07	1.96382e-06	5.7069
Interleukin-12 family signaling	21	96	0.00672693	2.02529e-07	2.02529e-06	5.69351
Transcription of E2F targets under negative control by DREAM complex	11	25	0.0017518	2.51788e-07	2.51788e-06	5.59896
Cellular responses to stress	92	952	0.0667087	2.58691e-07	2.58691e-06	5.58722
Polymerase switching on the C-strand of the telomere	12	31	0.00217224	2.79163e-07	2.79163e-06	5.55414
TP53 Regulates Transcription of Genes Involved in G1 Cell Cycle Arrest	10	20	0.00140144	2.80098e-07	2.80098e-06	5.55269
Factors involved in megakaryocyte development and platelet production	31	194	0.013594	3.09015e-07	3.09015e-06	5.51002
Gap-filling DNA repair synthesis and ligation in TC-NER	17	66	0.00462476	3.22912e-07	3.22912e-06	5.49092
APC-Cdc20 mediated degradation of Nek2A	11	26	0.00182188	3.68755e-07	3.68755e-06	5.43326
Unwinding of DNA	8	12	0.000840866	5.26289e-07	4.7366e-06	5.32453
Activation of APC/C and APC/C:Cdc20 mediated degradation of mitotic proteins	18	77	0.00539556	5.84197e-07	5.25777e-06	5.2792
Formation of Senescence-Associated Heterochromatin Foci (SAHF)	9	17	0.00119123	6.89816e-07	6.20834e-06	5.20702
Metabolism of RNA	78	783	0.0548665	7.41051e-07	6.66946e-06	5.17591
Oxidative Stress Induced Senescence	22	114	0.00798823	8.263e-07	7.4367e-06	5.12862
Resolution of Abasic Sites (AP sites)	14	48	0.00336346	8.38223e-07	7.544e-06	5.1224
Cyclin E associated events during G1/S transition	19	88	0.00616635	9.19009e-07	8.27108e-06	5.08244
mRNA Splicing - Minor Pathway	15	56	0.00392404	9.77123e-07	8.79411e-06	5.05581
Prefoldin mediated transfer of substrate to CCT/TriC	11	29	0.00203209	1.05551e-06	9.49961e-06	5.02229
Orc1 removal from chromatin	17	73	0.00511527	1.25423e-06	1.12881e-05	4.94738
TP53 Regulates Transcription of Cell Cycle Genes	16	65	0.00455469	1.26981e-06	1.14283e-05	4.94202
Aberrant regulation of mitotic cell cycle due to RB1 defects	12	36	0.0025226	1.30711e-06	1.1764e-05	4.92945
Cooperation of Prefoldin and TriC/CCT in actin and tubulin folding	12	37	0.00259267	1.72726e-06	1.55453e-05	4.8084
PRC2 methylates histones and DNA	13	44	0.00308318	1.78292e-06	1.60462e-05	4.79463
APC/C:Cdc20 mediated degradation of mitotic proteins	17	76	0.00532549	2.13486e-06	1.70789e-05	4.76754
Dual incision in TC-NER	16	68	0.00476491	2.24431e-06	1.79545e-05	4.74583
Diseases of mitotic cell cycle	12	38	0.00266274	2.26256e-06	1.81005e-05	4.74231
Transcription of E2F targets under negative control by p107 (RBL1) and p130 (RBL2) in complex with HDAC1	9	20	0.00140144	2.57056e-06	2.05645e-05	4.68688
Condensation of Prometaphase Chromosomes	8	15	0.00105108	2.71158e-06	2.16926e-05	4.66369
Apoptotic execution phase	14	54	0.0037839	3.22057e-06	2.57645e-05	4.58898
Meiotic synapsis	15	62	0.00434447	3.3191e-06	2.65528e-05	4.57589
Initiation of Nuclear Envelope (NE) Reformation	10	27	0.00189195	3.98301e-06	3.18641e-05	4.4967
Positive epigenetic regulation of rRNA expression	17	80	0.00560577	4.16539e-06	3.33231e-05	4.47725
Regulation of TP53 Activity	27	178	0.0124728	4.51469e-06	3.61176e-05	4.44228
Transport of Mature Transcript to Cytoplasm	18	90	0.0063065	4.98866e-06	3.99093e-05	4.39893
Microtubule-dependent trafficking of connexons from Golgi to the plasma membrane	9	22	0.00154159	5.49534e-06	4.39627e-05	4.35692
MHC class II antigen presentation	24	149	0.0104408	5.71833e-06	4.57466e-05	4.33964
APC:Cdc20 mediated degradation of cell cycle proteins prior to satisfation of the cell cycle checkpoint	16	74	0.00518534	6.4032e-06	5.12256e-05	4.29051
Phosphorylation of Emi1	6	8	0.000560577	7.26721e-06	5.81377e-05	4.23554
Transport of connexons to the plasma membrane	9	23	0.00161166	7.80682e-06	6.24546e-05	4.20444
Transcription-Coupled Nucleotide Excision Repair (TC-NER)	17	85	0.00595613	9.05365e-06	7.24292e-05	4.14009
Formation of tubulin folding intermediates by CCT/TriC	10	30	0.00210217	9.85047e-06	7.63251e-05	4.11733
APC/C:Cdc20 mediated degradation of Cyclin B	9	24	0.00168173	1.09036e-05	7.63251e-05	4.11733
B-WICH complex positively regulates rRNA expression	14	62	0.00434447	1.48868e-05	0.000104207	3.9821
Apoptosis	27	192	0.0134539	1.69453e-05	0.000118617	3.92585
Epigenetic regulation of gene expression	22	139	0.00974003	1.7964e-05	0.000125748	3.9005
HSP90 chaperone cycle for steroid hormone receptors (SHR) in the presence of ligand	15	72	0.0050452	1.88608e-05	0.000132026	3.87934
Transport of Mature mRNA derived from an Intron-Containing Transcript	16	81	0.00567585	1.90706e-05	0.000133494	3.87454
Assembly of the ORC complex at the origin of replication	11	40	0.00280289	2.10011e-05	0.000147007	3.83266
Processive synthesis on the C-strand of the telomere	10	33	0.00231238	2.20365e-05	0.000154256	3.81176
Cdc20:Phospho-APC/C mediated degradation of Cyclin A	15	73	0.00511527	2.2054e-05	0.000154378	3.81141
Global Genome Nucleotide Excision Repair (GG-NER)	17	92	0.00644664	2.43601e-05	0.00017052	3.76822
APC/C:Cdh1 mediated degradation of Cdc20 and other APC/C:Cdh1 targeted proteins in late mitosis/early G1	15	74	0.00518534	2.57157e-05	0.00018001	3.7447
Chk1/Chk2(Cds1) mediated inactivation of Cyclin B:Cdk1 complex	7	15	0.00105108	2.65246e-05	0.000185672	3.73125
Mitotic Telophase/Cytokinesis	7	15	0.00105108	2.65246e-05	0.000185672	3.73125
Activation of AMPK downstream of NMDARs	10	34	0.00238245	2.82748e-05	0.000197924	3.7035
Inhibition of the proteolytic activity of APC/C required for the onset of anaphase by mitotic spindle checkpoint components	8	21	0.00147152	2.99258e-05	0.000209481	3.67886
Inactivation of APC/C via direct inhibition of the APC/C complex	8	21	0.00147152	2.99258e-05	0.000209481	3.67886
mRNA 3'-end processing	13	58	0.00406419	3.20376e-05	0.000224264	3.64924
Cyclin D associated events in G1	12	51	0.00357368	4.03736e-05	0.000272289	3.56497
G1 Phase	12	51	0.00357368	4.03736e-05	0.000272289	3.56497
Removal of the Flap Intermediate from the C-strand	8	22	0.00154159	4.13702e-05	0.000272289	3.56497
Mismatch repair (MMR) directed by MSH2:MSH3 (MutSbeta)	8	22	0.00154159	4.13702e-05	0.000272289	3.56497
Mismatch repair (MMR) directed by MSH2:MSH6 (MutSalpha)	8	22	0.00154159	4.13702e-05	0.000272289	3.56497
DNA methylation	10	36	0.0025226	4.53815e-05	0.000272289	3.56497
G2/M DNA replication checkpoint	5	7	0.000490505	5.34843e-05	0.000320906	3.49362
Mismatch Repair	8	23	0.00161166	5.62547e-05	0.000337528	3.47169
Nucleotide Excision Repair	19	119	0.00833859	5.8398e-05	0.000350388	3.45545
Intra-Golgi and retrograde Golgi-to-ER traffic	28	219	0.0153458	6.145e-05	0.0003687	3.43333
Transcriptional regulation of granulopoiesis	14	71	0.00497512	6.31539e-05	0.000378923	3.42145
SUMOylation of DNA damage response and repair proteins	15	81	0.00567585	7.0096e-05	0.000420576	3.37616
Translocation of SLC2A4 (GLUT4) to the plasma membrane	15	81	0.00567585	7.0096e-05	0.000420576	3.37616
Diseases of DNA Double-Strand Break Repair	8	24	0.00168173	7.53476e-05	0.000452086	3.34478
Defective HDR through Homologous Recombination (HRR) due to PALB2 loss of function	8	24	0.00168173	7.53476e-05	0.000452086	3.34478
Defective HDR through Homologous Recombination Repair (HRR) due to PALB2 loss of BRCA1 binding function	8	24	0.00168173	7.53476e-05	0.000452086	3.34478
Defective HDR through Homologous Recombination (HRR) due to BRCA1 loss-of-function	8	24	0.00168173	7.53476e-05	0.000452086	3.34478
Defective HDR through Homologous Recombination Repair (HRR) due to PALB2 loss of BRCA2/RAD51/RAD51C binding function	8	24	0.00168173	7.53476e-05	0.000452086	3.34478
E2F mediated regulation of DNA replication	8	24	0.00168173	7.53476e-05	0.000452086	3.34478
Recycling pathway of L1	12	55	0.00385397	8.1869e-05	0.000491214	3.30873
Intraflagellar transport	12	56	0.00392404	9.66989e-05	0.000580193	3.23643
Post-chaperonin tubulin folding pathway	8	25	0.0017518	9.95309e-05	0.000597186	3.22389
Programmed Cell Death	29	238	0.0166772	0.000103781	0.000622688	3.20573
ERCC6 (CSB) and EHMT2 (G9a) positively regulate rRNA expression	11	48	0.00336346	0.000104994	0.000629967	3.20068
Establishment of Sister Chromatid Cohesion	6	13	0.000910938	0.000105868	0.00063521	3.19708
SUMOylation of DNA replication proteins	11	50	0.00350361	0.000149025	0.000894148	3.04859
Phosphorylation of the APC/C	7	20	0.00140144	0.000156618	0.000939708	3.02701
Gene expression (Transcription)	139	1855	0.129984	0.000172372	0.00103423	2.98538
Selective autophagy	15	89	0.00623642	0.000192491	0.00115495	2.93744
Respiratory electron transport, ATP synthesis by chemiosmotic coupling, and heat production by uncoupling proteins.	21	153	0.010721	0.000195022	0.00117013	2.93176
Downregulation of TGF-beta receptor signaling	8	28	0.00196202	0.000213288	0.00127973	2.89288
SCF(Skp2)-mediated degradation of p27/p21	12	62	0.00434447	0.000243461	0.00146077	2.83542
COPI-independent Golgi-to-ER retrograde traffic	12	63	0.00441455	0.00028072	0.00168432	2.77358
Diseases of DNA repair	9	37	0.00259267	0.000284615	0.00170769	2.76759
Resolution of D-loop Structures through Synthesis-Dependent Strand Annealing (SDSA)	8	30	0.00210217	0.000336451	0.0020187	2.69493
CDK-mediated phosphorylation and removal of Cdc6	13	75	0.00525541	0.000387433	0.00207415	2.68316
Recognition and association of DNA glycosylase with site containing an affected purine	9	39	0.00273281	0.000414829	0.00207415	2.68316
Sealing of the nuclear envelope (NE) by ESCRT-III	9	39	0.00273281	0.000414829	0.00207415	2.68316
Host Interactions of HIV factors	20	151	0.0105809	0.000427028	0.00213514	2.67057
SLBP Dependent Processing of Replication-Dependent Histone Pre-mRNAs	5	11	0.000770794	0.00042718	0.0021359	2.67042
Defective binding of RB1 mutants to E2F1,(E2F2, E2F3)	6	17	0.00119123	0.000439348	0.00219674	2.65822
Aberrant regulation of mitotic G1/S transition in cancer due to RB1 defects	6	17	0.00119123	0.000439348	0.00219674	2.65822
Inhibition of DNA recombination at telomere	10	48	0.00336346	0.00044733	0.00223665	2.6504
Respiratory electron transport	17	118	0.00826852	0.000449503	0.00224752	2.6483
Formation of the beta-catenin:TCF transactivating complex	12	67	0.00469484	0.000481948	0.00240974	2.61803
Estrogen-dependent gene expression	20	154	0.0107911	0.000543436	0.00271718	2.56588
Gap junction assembly	9	41	0.00287296	0.000590529	0.00295265	2.52979
RNA Polymerase II Transcription	125	1694	0.118702	0.000694232	0.00347116	2.45953
Recognition and association of DNA glycosylase with site containing an affected pyrimidine	9	42	0.00294303	0.000698876	0.00349438	2.45663
RHO GTPases activate PKNs	13	80	0.00560577	0.000699122	0.00349561	2.45648
G2 Phase	4	7	0.000490505	0.000699181	0.00349591	2.45644
Packaging Of Telomere Ends	8	34	0.00238245	0.000755907	0.00377953	2.42256
RNA Polymerase I Promoter Opening	8	34	0.00238245	0.000755907	0.00377953	2.42256
Gap junction trafficking	10	52	0.00364375	0.000819213	0.00409606	2.38763
RMTs methylate histone arginines	10	53	0.00371383	0.000943927	0.00471963	2.32609
Aberrant regulation of mitotic exit in cancer due to RB1 defects	6	20	0.00140144	0.00101341	0.00506706	2.29524
Resolution of D-loop Structures through Holliday Junction Intermediates	8	36	0.0025226	0.00108516	0.00542581	2.26554
TGF-beta receptor signaling activates SMADs	8	36	0.0025226	0.00108516	0.00542581	2.26554
SIRT1 negatively regulates rRNA expression	9	45	0.00315325	0.00112476	0.0056238	2.24997
Cleavage of the damaged purine	9	45	0.00315325	0.00112476	0.0056238	2.24997
RNA Polymerase I Promoter Escape	11	64	0.00448462	0.00113031	0.00565156	2.24783
Chaperonin-mediated protein folding	14	96	0.00672693	0.0012345	0.00617251	2.20954
Nuclear Envelope Breakdown	11	65	0.00455469	0.00127632	0.0063816	2.19507
Resolution of D-Loop Structures	8	37	0.00259267	0.00128804	0.00644022	2.1911
HCMV Early Events	24	215	0.0150655	0.00129091	0.00645456	2.19013
TP53 Regulates Transcription of Genes Involved in G2 Cell Cycle Arrest	6	21	0.00147152	0.00129658	0.00648288	2.18823
Depurination	9	46	0.00322332	0.00130615	0.00653073	2.18504
HIV Life Cycle	21	179	0.0125429	0.00140302	0.00701509	2.15397
Gap junction trafficking and regulation	10	56	0.00392404	0.00141443	0.00707215	2.15045
RNA Polymerase I Promoter Clearance	13	87	0.00609628	0.0014698	0.00734901	2.13377
Chromatin modifying enzymes	27	256	0.0179385	0.00149605	0.00748023	2.12609
Chromatin organization	27	256	0.0179385	0.00149605	0.00748023	2.12609
Conversion from APC/C:Cdc20 to APC/C:Cdh1 in late anaphase	6	22	0.00154159	0.00163651	0.00818253	2.08711
E2F-enabled inhibition of pre-replication complex formation	4	9	0.00063065	0.00175095	0.00875476	2.05776
Activation of NIMA Kinases NEK9, NEK6, NEK7	4	9	0.00063065	0.00175095	0.00875476	2.05776
RNA Polymerase I Transcription	13	89	0.00623642	0.00178875	0.00894374	2.04848
Negative epigenetic regulation of rRNA expression	13	89	0.00623642	0.00178875	0.00894374	2.04848
PKMTs methylate histone lysines	9	49	0.00343354	0.0019957	0.00912308	2.03986
Assembly and cell surface presentation of NMDA receptors	9	49	0.00343354	0.0019957	0.00912308	2.03986
NoRC negatively regulates rRNA expression	12	80	0.00560577	0.00213026	0.00912308	2.03986
Protein folding	14	102	0.00714736	0.00214016	0.00912308	2.03986
HIV Infection	27	264	0.0184991	0.00228077	0.00912308	2.03986
Transcriptional regulation by small RNAs	12	81	0.00567585	0.00235395	0.00941582	2.02614
Cohesin Loading onto Chromatin	4	10	0.000700722	0.00255513	0.0102205	1.99053
SLBP independent Processing of Histone Pre-mRNAs	4	10	0.000700722	0.00255513	0.0102205	1.99053
Cleavage of the damaged pyrimidine	9	51	0.00357368	0.002598	0.010392	1.9833
Depyrimidination	9	51	0.00357368	0.002598	0.010392	1.9833
Activation of anterior HOX genes in hindbrain development during early embryogenesis	15	116	0.00812837	0.00265063	0.0106025	1.97459
Activation of HOX genes during differentiation	15	116	0.00812837	0.00265063	0.0106025	1.97459
G1/S DNA Damage Checkpoints	11	72	0.0050452	0.00279085	0.0111634	1.9522
HSF1 activation	8	43	0.0030131	0.00322009	0.0128804	1.89007
Fanconi Anemia Pathway	9	53	0.00371383	0.003336	0.013344	1.87471
CDC6 association with the ORC:origin complex	4	11	0.000770794	0.00358205	0.0143282	1.84381
Autodegradation of Cdh1 by Cdh1:APC/C	10	64	0.00448462	0.00364566	0.0145826	1.83616
DNA Double Strand Break Response	11	75	0.00525541	0.00377691	0.0151077	1.8208
Carboxyterminal post-translational modifications of tubulin	9	55	0.00385397	0.00422964	0.0169186	1.77164
The citric acid (TCA) cycle and respiratory electron transport	24	238	0.0166772	0.00458946	0.0183579	1.73618
Transcriptional activation of p53 responsive genes	3	6	0.000420433	0.0048232	0.0192928	1.7146
Transcriptional activation of cell cycle inhibitor p21	3	6	0.000420433	0.0048232	0.0192928	1.7146
MASTL Facilitates Mitotic Progression	4	12	0.000840866	0.00485816	0.0194326	1.71147
Recruitment and ATM-mediated phosphorylation of repair and signaling proteins at DNA double strand breaks	10	67	0.00469484	0.00498501	0.0199401	1.70027
Interactions of Rev with host cellular proteins	8	47	0.00329339	0.0054256	0.0217024	1.66349
APC/C:Cdc20 mediated degradation of Securin	10	68	0.00476491	0.00550827	0.0220331	1.65692
CDT1 association with the CDC6:ORC:origin complex	9	59	0.00413426	0.00656873	0.0262749	1.58046
p53-Dependent G1/S DNA damage checkpoint	10	70	0.00490505	0.00668287	0.0267315	1.57298
p53-Dependent G1 DNA Damage Response	10	70	0.00490505	0.00668287	0.0267315	1.57298
Activated PKN1 stimulates transcription of AR (androgen receptor) regulated genes KLK2 and KLK3	8	49	0.00343354	0.0068883	0.0275532	1.55983
mRNA decay by 5' to 3' exoribonuclease	5	21	0.00147152	0.00690276	0.027611	1.55892
Deregulated CDK5 triggers multiple neurodegenerative pathways in Alzheimer's disease models	6	30	0.00210217	0.0072806	0.0291224	1.53577
Neurodegenerative Diseases	6	30	0.00210217	0.0072806	0.0291224	1.53577
SUMO is transferred from E1 to E2 (UBE2I, UBC9)	3	7	0.000490505	0.00735276	0.029411	1.53149
PTK6 Regulates Proteins Involved in RNA Processing	3	7	0.000490505	0.00735276	0.029411	1.53149
RUNX1 regulates transcription of genes involved in differentiation of HSCs	13	106	0.00742765	0.00750242	0.0300097	1.52274
Gene Silencing by RNA	14	120	0.00840866	0.0085399	0.0341596	1.46649
Post NMDA receptor activation events	12	96	0.00672693	0.00866715	0.0346686	1.46006
Base-Excision Repair, AP Site Formation	9	63	0.00441455	0.00979274	0.039171	1.40704
RHO GTPases activate CIT	5	23	0.00161166	0.00994906	0.0397962	1.40016
Depolymerisation of the Nuclear Lamina	5	23	0.00161166	0.00994906	0.0397962	1.40016
Oncogene Induced Senescence	7	42	0.00294303	0.0100249	0.0400994	1.39686
Inhibition of replication initiation of damaged DNA by RB1/E2F1	4	15	0.00105108	0.0104208	0.0416833	1.38004
SUMO is conjugated to E1 (UBA2:SAE1)	3	8	0.000560577	0.0105379	0.0421516	1.37519
HCMV Infection	25	270	0.0189195	0.010642	0.042568	1.37092
Intrinsic Pathway for Apoptosis	9	64	0.00448462	0.0107586	0.0430344	1.36618
ESR-mediated signaling	24	257	0.0180085	0.0110646	0.0442584	1.354
Synthesis of active ubiquitin: roles of E1 and E2 enzymes	6	33	0.00231238	0.0112449	0.0449796	1.34698
Defective Intrinsic Pathway for Apoptosis	6	33	0.00231238	0.0112449	0.0449796	1.34698
Macroautophagy	16	150	0.0105108	0.0114363	0.0457451	1.33966
Deadenylation-dependent mRNA decay	9	65	0.00455469	0.0117942	0.0471769	1.32627
Late Phase of HIV Life Cycle	17	164	0.0114918	0.0120617	0.0482467	1.31653
Signaling by TCF7L2 mutants	2	3	0.000210217	0.0124602	0.0498409	1.30241
Pre-NOTCH Transcription and Translation	11	89	0.00623642	0.0125696	0.0502782	1.29862
Deactivation of the beta-catenin transactivating complex	7	44	0.00308318	0.0126517	0.0506066	1.29579
DNA replication initiation	4	16	0.00112115	0.0129229	0.0516916	1.28658
SCF-beta-TrCP mediated degradation of Emi1	8	55	0.00385397	0.0130773	0.0523094	1.28142
Rev-mediated nuclear export of HIV RNA	7	45	0.00315325	0.0141359	0.0565435	1.24762
AUF1 (hnRNP D0) binds and destabilizes mRNA	8	56	0.00392404	0.0144112	0.0576449	1.23924
Golgi Cisternae Pericentriolar Stack Reorganization	4	17	0.00119123	0.0157782	0.063113	1.19988
Nonhomologous End-Joining (NHEJ)	8	57	0.00399411	0.0158414	0.0633655	1.19815
Early Phase of HIV Life Cycle	5	26	0.00182188	0.016072	0.0639221	1.19435
Activation of BH3-only proteins	6	36	0.0025226	0.0165331	0.0639221	1.19435
Regulation of mRNA stability by proteins that bind AU-rich elements	11	93	0.00651671	0.0168033	0.0639221	1.19435
Generic Transcription Pathway	106	1555	0.108962	0.0173041	0.0639221	1.19435
COPI-mediated anterograde transport	12	107	0.00749772	0.0186486	0.0639221	1.19435
ISG15 antiviral mechanism	10	83	0.00581599	0.0196574	0.0639221	1.19435
TCF dependent signaling in response to WNT	20	216	0.0151356	0.0207071	0.0639221	1.19435
Cellular response to heat stress	14	135	0.00945974	0.021247	0.0639221	1.19435
Processing of Capped Intronless Pre-mRNA	5	28	0.00196202	0.0213074	0.0639221	1.19435
Mitotic Metaphase/Anaphase Transition	2	4	0.000280289	0.0213598	0.0640793	1.19328
Vpr-mediated induction of apoptosis by mitochondrial outer membrane permeabilization	2	4	0.000280289	0.0213598	0.0640793	1.19328
HATs acetylate histones	12	110	0.00770794	0.0224688	0.0674063	1.1713
Tat-mediated HIV elongation arrest and recovery	6	39	0.00273281	0.0233256	0.0699768	1.15505
Pausing and recovery of Tat-mediated HIV elongation	6	39	0.00273281	0.0233256	0.0699768	1.15505
Hedgehog 'off' state	13	124	0.00868895	0.0238916	0.0716748	1.14463
Cellular response to hypoxia	10	86	0.00602621	0.0242939	0.0728816	1.13738
HIV elongation arrest and recovery	6	40	0.00280289	0.0259515	0.0778544	1.10872
Pausing and recovery of HIV elongation	6	40	0.00280289	0.0259515	0.0778544	1.10872
Autophagy	16	166	0.011632	0.0262303	0.078691	1.10407
TP53 Regulates Metabolic Genes	13	126	0.00882909	0.0266876	0.0800629	1.09657
Activation of NMDA receptors and postsynaptic events	12	113	0.00791816	0.0268379	0.0805137	1.09413
Amyloid fiber formation	10	89	0.00623642	0.0296703	0.089011	1.05056
Cristae formation	5	31	0.00217224	0.0310526	0.0931579	1.03078
Phosphorylation of proteins involved in the G2/M transition by Cyclin A:Cdc2 complexes	2	5	0.000350361	0.0321873	0.0965619	1.01519
RUNX1 regulates genes involved in megakaryocyte differentiation and platelet function	9	78	0.00546563	0.0328798	0.0986395	1.00595
Metabolism of non-coding RNA	8	66	0.00462476	0.0336061	0.100818	0.99646
snRNP Assembly	8	66	0.00462476	0.0336061	0.100818	0.99646
Postmitotic nuclear pore complex (NPC) reformation	5	32	0.00224231	0.0348303	0.104491	0.980921
Regulation of TP53 Degradation	6	43	0.0030131	0.0349824	0.104947	0.979029
RHOC GTPase cycle	9	79	0.0055357	0.0351787	0.105536	0.976599
Telomere C-strand synthesis initiation	4	22	0.00154159	0.0357671	0.107301	0.969395
Folding of actin by CCT/TriC	3	13	0.000910938	0.0369618	0.110885	0.955126
Processing and activation of SUMO	3	13	0.000910938	0.0369618	0.110885	0.955126
Interconversion of nucleotide di- and triphosphates	9	80	0.00560577	0.0375857	0.112757	0.947856
Vif-mediated degradation of APOBEC3G	7	56	0.00392404	0.0393626	0.118088	0.927795
Antiviral mechanism by IFN-stimulated genes	10	94	0.00658678	0.0404152	0.121246	0.916334
Formation of ATP by chemiosmotic coupling	4	23	0.00161166	0.0409577	0.122873	0.910543
Chaperone Mediated Autophagy	4	23	0.00161166	0.0409577	0.122873	0.910543
RHOD GTPase cycle	7	57	0.00399411	0.0425627	0.127688	0.89385
Phosphorylation of proteins involved in G1/S transition by active Cyclin E:Cdk2 complexes	2	6	0.000420433	0.0447086	0.134126	0.872487
TFAP2 (AP-2) family regulates transcription of cell cycle factors	2	6	0.000420433	0.0447086	0.134126	0.872487
NADE modulates death signalling	2	6	0.000420433	0.0447086	0.134126	0.872487
Regulation of TP53 Expression and Degradation	6	46	0.00322332	0.0458226	0.137468	0.861799
RHOBTB2 GTPase cycle	4	24	0.00168173	0.0465526	0.139658	0.854935
Protein ubiquitination	9	84	0.00588606	0.0483305	0.144992	0.838657
Complex I biogenesis	7	59	0.00413426	0.0494559	0.148368	0.828661
Formation of Incision Complex in GG-NER	6	47	0.00329339	0.0498512	0.149554	0.825203
Attenuation phase	6	47	0.00329339	0.0498512	0.149554	0.825203
Interactions of Vpr with host cellular proteins	6	47	0.00329339	0.0498512	0.149554	0.825203
APOBEC3G mediated resistance to HIV-1 infection	3	15	0.00105108	0.052427	0.157281	0.803324
Cytochrome c-mediated apoptotic response	3	15	0.00105108	0.052427	0.157281	0.803324
ATF6 (ATF6-alpha) activates chaperone genes	3	15	0.00105108	0.052427	0.157281	0.803324
Integration of provirus	3	15	0.00105108	0.052427	0.157281	0.803324
Regulation of gene expression by Hypoxia-inducible Factor	3	15	0.00105108	0.052427	0.157281	0.803324
RHOBTB GTPase Cycle	5	36	0.0025226	0.0526907	0.158072	0.801145
Cellular response to chemical stress	18	212	0.0148553	0.0540837	0.162251	0.789812
Transcriptional Regulation by VENTX	6	48	0.00336346	0.0540905	0.162272	0.789758
NEIL3-mediated resolution of ICLs	1	1	7.00722e-05	0.0541197	0.162359	0.789523
Defective Base Excision Repair Associated with NEIL3	1	1	7.00722e-05	0.0541197	0.162359	0.789523
Regulation of HSF1-mediated heat shock response	11	113	0.00791816	0.0549059	0.164718	0.78326
Signaling by TGF-beta Receptor Complex	9	87	0.00609628	0.0576044	0.172813	0.762423
Pre-NOTCH Expression and Processing	11	114	0.00798823	0.0576837	0.173051	0.761826
Formation of HIV-1 elongation complex containing HIV-1 Tat	6	49	0.00343354	0.0585417	0.175625	0.755414
FLT3 signaling by CBL mutants	2	7	0.000490505	0.0587092	0.176128	0.754173
SMAC(DIABLO)-mediated dissociation of IAP:caspase complexes	2	7	0.000490505	0.0587092	0.176128	0.754173
SMAC (DIABLO) binds to IAPs	2	7	0.000490505	0.0587092	0.176128	0.754173
Constitutive Signaling by Ligand-Responsive EGFR Cancer Variants	4	26	0.00182188	0.0589483	0.176845	0.752407
Signaling by Ligand-Responsive EGFR Variants in Cancer	4	26	0.00182188	0.0589483	0.176845	0.752407
Repression of WNT target genes	3	16	0.00112115	0.0611511	0.183453	0.736474
Metallothioneins bind metals	3	16	0.00112115	0.0611511	0.183453	0.736474
RHOB GTPase cycle	8	75	0.00525541	0.0615929	0.184779	0.733348
Cytoprotection by HMOX1	14	158	0.0110714	0.0627242	0.188173	0.725443
Formation of HIV elongation complex in the absence of HIV Tat	6	50	0.00350361	0.0632053	0.189616	0.722125
Apoptotic cleavage of cellular proteins	5	38	0.00266274	0.0632933	0.18988	0.721521
L1CAM interactions	12	130	0.00910938	0.0636933	0.19108	0.718785
TP53 Regulates Transcription of DNA Repair Genes	9	89	0.00623642	0.0643835	0.193151	0.714104
Signaling by NOTCH3	7	63	0.00441455	0.0652589	0.195777	0.708239
Inactivation of CSF3 (G-CSF) signaling	4	27	0.00189195	0.0657413	0.197224	0.70504
Signaling by Nuclear Receptors	29	387	0.0271179	0.0688055	0.206417	0.685256
ATF6 (ATF6-alpha) activates chaperones	3	17	0.00119123	0.0705036	0.211511	0.674667
FGFR2 alternative splicing	4	28	0.00196202	0.0729231	0.218769	0.660013
NOTCH3 Activation and Transmission of Signal to the Nucleus	4	28	0.00196202	0.0729231	0.218769	0.660013
HIV Transcription Elongation	6	52	0.00364375	0.0731703	0.219511	0.658544
Tat-mediated elongation of the HIV-1 transcript	6	52	0.00364375	0.0731703	0.219511	0.658544
Activation of caspases through apoptosome-mediated cleavage	2	8	0.000560577	0.0739926	0.221978	0.65369
SMAC, XIAP-regulated apoptotic response	2	8	0.000560577	0.0739926	0.221978	0.65369
RUNX3 regulates CDKN1A transcription	2	8	0.000560577	0.0739926	0.221978	0.65369
Maturation of protein E	2	8	0.000560577	0.0739926	0.221978	0.65369
Maturation of protein E	2	8	0.000560577	0.0739926	0.221978	0.65369
Transport of the SLBP Dependant Mature mRNA	5	40	0.00280289	0.075007	0.225021	0.647777
NRIF signals cell death from the nucleus	3	18	0.0012613	0.0804561	0.235642	0.627747
Regulation of BACH1 activity	3	18	0.0012613	0.0804561	0.235642	0.627747
Nuclear import of Rev protein	5	41	0.00287296	0.081275	0.235642	0.627747
Ubiquitin Mediated Degradation of Phosphorylated Cdc25A	6	54	0.0037839	0.083981	0.235642	0.627747
p53-Independent G1/S DNA damage checkpoint	6	54	0.0037839	0.083981	0.235642	0.627747
p53-Independent DNA Damage Response	6	54	0.0037839	0.083981	0.235642	0.627747
Ubiquitin-dependent degradation of Cyclin D	6	54	0.0037839	0.083981	0.235642	0.627747
Nuclear Pore Complex (NPC) Disassembly	5	42	0.00294303	0.0878126	0.235642	0.627747
FBXL7 down-regulates AURKA during mitotic entry and in early mitosis	6	55	0.00385397	0.0897002	0.235642	0.627747
Autointegration results in viral DNA circles	2	9	0.00063065	0.0903794	0.235642	0.627747
Integration of viral DNA into host genomic DNA	2	9	0.00063065	0.0903794	0.235642	0.627747
Regulation of gene expression in endocrine-committed (NEUROG3+) progenitor cells	2	9	0.00063065	0.0903794	0.235642	0.627747
Activation of BAD and translocation to mitochondria	3	19	0.00133137	0.0909781	0.235642	0.627747
Signaling by Hedgehog	14	168	0.0117721	0.091434	0.235642	0.627747
Signaling by NOTCH	20	259	0.0181487	0.0925252	0.235642	0.627747
FLT3 signaling in disease	5	43	0.0030131	0.0946156	0.235642	0.627747
SUMOylation of transcription cofactors	5	44	0.00308318	0.101679	0.235642	0.627747
Negative regulation of NOTCH4 signaling	6	57	0.00399411	0.101756	0.235642	0.627747
Signaling by Non-Receptor Tyrosine Kinases	7	71	0.00497512	0.105035	0.235642	0.627747
Signaling by PTK6	7	71	0.00497512	0.105035	0.235642	0.627747
Defective DNA double strand break response due to BARD1 loss of function	1	2	0.000140144	0.105314	0.235642	0.627747
Evasion of Oncogene Induced Senescence Due to Defective p16INK4A binding to CDK4	1	2	0.000140144	0.105314	0.235642	0.627747
Evasion of Oxidative Stress Induced Senescence Due to Defective p16INK4A binding to CDK4	1	2	0.000140144	0.105314	0.235642	0.627747
Defective DNA double strand break response due to BRCA1 loss of function	1	2	0.000140144	0.105314	0.235642	0.627747
Signaling by EGFR in Cancer	4	32	0.00224231	0.105362	0.235642	0.627747
Metalloprotease DUBs	4	32	0.00224231	0.105362	0.235642	0.627747
Regulation of PTEN localization	2	10	0.000700722	0.107706	0.235642	0.627747
Oxygen-dependent proline hydroxylation of Hypoxia-inducible Factor Alpha	7	72	0.0050452	0.110761	0.235642	0.627747
Response to metal ions	3	21	0.00147152	0.1136	0.235642	0.627747
HSF1-dependent transactivation	6	59	0.00413426	0.114615	0.235642	0.627747
RHOF GTPase cycle	5	46	0.00322332	0.116565	0.235642	0.627747
Signaling by TGFB family members	10	116	0.00812837	0.117821	0.235642	0.627747
Transcriptional regulation by RUNX2	12	147	0.0103006	0.124127	0.248254	0.605103
Transport of Mature mRNAs Derived from Intronless Transcripts	5	47	0.00329339	0.124374	0.248748	0.604241
CREB1 phosphorylation through the activation of CaMKII/CaMKK/CaMKIV cascasde	2	11	0.000770794	0.125822	0.251644	0.599213
Myoclonic epilepsy of Lafora	2	11	0.000770794	0.125822	0.251644	0.599213
Downregulation of ERBB4 signaling	2	11	0.000770794	0.125822	0.251644	0.599213
Modulation by Mtb of host immune system	2	11	0.000770794	0.125822	0.251644	0.599213
PTK6 Regulates RTKs and Their Effectors AKT1 and DOK1	2	11	0.000770794	0.125822	0.251644	0.599213
Signaling by CSF3 (G-CSF)	4	35	0.00245253	0.133268	0.266537	0.574243
SUMOylation of chromatin organization proteins	6	62	0.00434447	0.13535	0.270699	0.567513
Apoptotic factor-mediated response	3	23	0.00161166	0.138097	0.276193	0.558787
Regulation of TP53 Activity through Methylation	3	23	0.00161166	0.138097	0.276193	0.558787
Degradation of beta-catenin by the destruction complex	8	91	0.00637657	0.139369	0.278739	0.554803
Downstream signaling events of B Cell Receptor (BCR)	8	91	0.00637657	0.139369	0.278739	0.554803
Potential therapeutics for SARS	8	91	0.00637657	0.139369	0.278739	0.554803
Regulated Necrosis	7	77	0.00539556	0.141768	0.283537	0.547391
HDACs deacetylate histones	6	63	0.00441455	0.142629	0.285259	0.544761
Formation of RNA Pol II elongation complex	6	63	0.00441455	0.142629	0.285259	0.544761
Downregulation of ERBB2 signaling	4	36	0.0025226	0.14318	0.28636	0.543087
IRAK2 mediated activation of TAK1 complex	2	12	0.000840866	0.144593	0.289186	0.538823
Caspase-mediated cleavage of cytoskeletal proteins	2	12	0.000840866	0.144593	0.289186	0.538823
Calcineurin activates NFAT	2	12	0.000840866	0.144593	0.289186	0.538823
HuR (ELAVL1) binds and stabilizes mRNA	2	12	0.000840866	0.144593	0.289186	0.538823
Regulation of activated PAK-2p34 by proteasome mediated degradation	5	50	0.00350361	0.14918	0.29836	0.525259
RHO GTPases Activate ROCKs	3	24	0.00168173	0.15096	0.30192	0.520108
RHOBTB1 GTPase cycle	3	24	0.00168173	0.15096	0.30192	0.520108
Evasion of Oxidative Stress Induced Senescence Due to p16INK4A Defects	1	3	0.000210217	0.153741	0.307481	0.512181
Evasion of Oncogene Induced Senescence Due to p16INK4A Defects	1	3	0.000210217	0.153741	0.307481	0.512181
Evasion of Oxidative Stress Induced Senescence Due to Defective p16INK4A binding to CDK4 and CDK6	1	3	0.000210217	0.153741	0.307481	0.512181
Evasion of Oncogene Induced Senescence Due to Defective p16INK4A binding to CDK4 and CDK6	1	3	0.000210217	0.153741	0.307481	0.512181
TALDO1 deficiency: failed conversion of SH7P, GA3P to Fru(6)P, E4P	1	3	0.000210217	0.153741	0.307481	0.512181
TALDO1 deficiency: failed conversion of Fru(6)P, E4P to SH7P, GA3P	1	3	0.000210217	0.153741	0.307481	0.512181
Manipulation of host energy metabolism	1	3	0.000210217	0.153741	0.307481	0.512181
Breakdown of the nuclear lamina	1	3	0.000210217	0.153741	0.307481	0.512181
RHOA GTPase cycle	12	154	0.0107911	0.156059	0.312117	0.505682
Regulation of ornithine decarboxylase (ODC)	5	51	0.00357368	0.157881	0.315763	0.500639
SUMOylation of RNA binding proteins	5	51	0.00357368	0.157881	0.315763	0.500639
Response of Mtb to phagocytosis	5	51	0.00357368	0.157881	0.315763	0.500639
Glucose metabolism	11	140	0.0098101	0.162733	0.325465	0.487495
Regulation of necroptotic cell death	4	38	0.00266274	0.163828	0.327656	0.484582
CaMK IV-mediated phosphorylation of CREB	2	13	0.000910938	0.163894	0.327788	0.484407
TICAM1,TRAF6-dependent induction of TAK1 complex	2	13	0.000910938	0.163894	0.327788	0.484407
Formation of apoptosome	2	13	0.000910938	0.163894	0.327788	0.484407
Regulation of the apoptosome activity	2	13	0.000910938	0.163894	0.327788	0.484407
Josephin domain DUBs	2	13	0.000910938	0.163894	0.327788	0.484407
2-LTR circle formation	2	13	0.000910938	0.163894	0.327788	0.484407
Pexophagy	2	13	0.000910938	0.163894	0.327788	0.484407
Negative regulation of MET activity	3	25	0.0017518	0.164187	0.328373	0.483632
Glycolysis	9	110	0.00770794	0.164627	0.329254	0.482469
RNA Polymerase II Transcription Elongation	6	66	0.00462476	0.165504	0.331008	0.480162
Gluconeogenesis	6	66	0.00462476	0.165504	0.331008	0.480162
Transcriptional regulation by the AP-2 (TFAP2) family of transcription factors	5	52	0.00364375	0.166785	0.33357	0.476814
Transcription of the HIV genome	7	81	0.00567585	0.169252	0.338504	0.470436
Signaling by WNT	23	332	0.023264	0.170094	0.340187	0.468282
Transport of the SLBP independent Mature mRNA	4	39	0.00273281	0.174532	0.349063	0.457096
Vpu mediated degradation of CD4	5	53	0.00371383	0.175881	0.351762	0.453751
Ub-specific processing proteases	15	206	0.0144349	0.180061	0.360123	0.44355
Mitochondrial biogenesis	10	128	0.00896924	0.181154	0.362308	0.440922
Alpha-protein kinase 1 signaling pathway	2	14	0.00098101	0.183613	0.367226	0.435066
Utilization of Ketone Bodies	2	14	0.00098101	0.183613	0.367226	0.435066
TICAM1-dependent activation of IRF3/IRF7	2	14	0.00098101	0.183613	0.367226	0.435066
InlA-mediated entry of Listeria monocytogenes into host cells	2	14	0.00098101	0.183613	0.367226	0.435066
Regulation of RUNX2 expression and activity	7	83	0.00581599	0.183807	0.367615	0.434607
UCH proteinases	8	98	0.00686707	0.184033	0.368066	0.434074
Regulation of Apoptosis	5	54	0.0037839	0.185161	0.369255	0.432674
Autodegradation of the E3 ubiquitin ligase COP1	5	54	0.0037839	0.185161	0.369255	0.432674
Association of TriC/CCT with target proteins during biosynthesis	4	40	0.00280289	0.185467	0.369255	0.432674
Abortive elongation of HIV-1 transcript in the absence of Tat	3	27	0.00189195	0.191589	0.369255	0.432674
Assembly Of The HIV Virion	3	27	0.00189195	0.191589	0.369255	0.432674
FOXO-mediated transcription of cell cycle genes	3	27	0.00189195	0.191589	0.369255	0.432674
Drug resistance in ERBB2 KD mutants	1	4	0.000280289	0.199549	0.369255	0.432674
Drug-mediated inhibition of ERBB2 signaling	1	4	0.000280289	0.199549	0.369255	0.432674
RAS GTPase cycle mutants	1	4	0.000280289	0.199549	0.369255	0.432674
Interaction between PHLDA1 and AURKA	1	4	0.000280289	0.199549	0.369255	0.432674
Resistance of ERBB2 KD mutants to trastuzumab	1	4	0.000280289	0.199549	0.369255	0.432674
Resistance of ERBB2 KD mutants to sapitinib	1	4	0.000280289	0.199549	0.369255	0.432674
Drug resistance in ERBB2 TMD/JMD mutants	1	4	0.000280289	0.199549	0.369255	0.432674
Resistance of ERBB2 KD mutants to AEE788	1	4	0.000280289	0.199549	0.369255	0.432674
Resistance of ERBB2 KD mutants to osimertinib	1	4	0.000280289	0.199549	0.369255	0.432674
Resistance of ERBB2 KD mutants to neratinib	1	4	0.000280289	0.199549	0.369255	0.432674
Resistance of ERBB2 KD mutants to tesevatinib	1	4	0.000280289	0.199549	0.369255	0.432674
Resistance of ERBB2 KD mutants to afatinib	1	4	0.000280289	0.199549	0.369255	0.432674
Defective SLC24A5 causes oculocutaneous albinism 6 (OCA6)	1	4	0.000280289	0.199549	0.369255	0.432674
Resistance of ERBB2 KD mutants to lapatinib	1	4	0.000280289	0.199549	0.369255	0.432674
Diseases of Cellular Senescence	1	4	0.000280289	0.199549	0.369255	0.432674
Diseases of cellular response to stress	1	4	0.000280289	0.199549	0.369255	0.432674
Influenza Virus Induced Apoptosis	1	4	0.000280289	0.199549	0.369255	0.432674
Stimulation of the cell death response by PAK-2p34	1	4	0.000280289	0.199549	0.369255	0.432674
HDR through MMEJ (alt-NHEJ)	2	15	0.00105108	0.203649	0.369255	0.432674
POLB-Dependent Long Patch Base Excision Repair	2	15	0.00105108	0.203649	0.369255	0.432674
Sodium/Calcium exchangers	2	15	0.00105108	0.203649	0.369255	0.432674
NF-kB is activated and signals survival	2	15	0.00105108	0.203649	0.369255	0.432674
Deadenylation of mRNA	3	28	0.00196202	0.205696	0.369255	0.432674
Regulation of RAS by GAPs	6	71	0.00497512	0.206738	0.369255	0.432674
ER to Golgi Anterograde Transport	12	164	0.0114918	0.208153	0.369255	0.432674
Transcriptional regulation by RUNX1	18	261	0.0182888	0.210151	0.369255	0.432674
Degradation of DVL	5	57	0.00399411	0.214006	0.369255	0.432674
Degradation of AXIN	5	57	0.00399411	0.214006	0.369255	0.432674
Regulation of RUNX3 expression and activity	5	57	0.00399411	0.214006	0.369255	0.432674
Transcriptional regulation by RUNX3	9	118	0.00826852	0.215511	0.369255	0.432674
RNA Polymerase II Pre-transcription Events	7	88	0.00616635	0.222295	0.369255	0.432674
Signaling by FGFR2	7	88	0.00616635	0.222295	0.369255	0.432674
Advanced glycosylation endproduct receptor signaling	2	16	0.00112115	0.22391	0.369255	0.432674
Downregulation of ERBB2:ERBB3 signaling	2	16	0.00112115	0.22391	0.369255	0.432674
Constitutive Signaling by Overexpressed ERBB2	2	16	0.00112115	0.22391	0.369255	0.432674
Regulation of FOXO transcriptional activity by acetylation	2	16	0.00112115	0.22391	0.369255	0.432674
Constitutive Signaling by NOTCH1 HD Domain Mutants	2	16	0.00112115	0.22391	0.369255	0.432674
Signaling by NOTCH1 HD Domain Mutants in Cancer	2	16	0.00112115	0.22391	0.369255	0.432674
p75NTR recruits signalling complexes	2	16	0.00112115	0.22391	0.369255	0.432674
Vpr-mediated nuclear import of PICs	4	44	0.00308318	0.231196	0.369255	0.432674
Ovarian tumor domain proteases	4	44	0.00308318	0.231196	0.369255	0.432674
Regulation of PTEN stability and activity	6	74	0.00518534	0.233069	0.369255	0.432674
Stabilization of p53	5	59	0.00413426	0.233974	0.369255	0.432674
Signaling by FLT3 ITD and TKD mutants	3	30	0.00210217	0.234556	0.369255	0.432674
Regulation of HMOX1 expression and activity	6	75	0.00525541	0.242071	0.369255	0.432674
Inhibition of nitric oxide production	1	5	0.000350361	0.242881	0.369255	0.432674
Activation of BIM and translocation to mitochondria	1	5	0.000350361	0.242881	0.369255	0.432674
Activation of BMF and translocation to mitochondria	1	5	0.000350361	0.242881	0.369255	0.432674
ROS sensing by NFE2L2	5	60	0.00420433	0.24415	0.369255	0.432674
Membrane binding and targetting of GAG proteins	2	17	0.00119123	0.244313	0.369255	0.432674
PIWI-interacting RNA (piRNA) biogenesis	3	31	0.00217224	0.249246	0.369255	0.432674
E3 ubiquitin ligases ubiquitinate target proteins	5	61	0.0042744	0.254439	0.369255	0.432674
Hh mutants are degraded by ERAD	5	61	0.0042744	0.254439	0.369255	0.432674
NIK-->noncanonical NF-kB signaling	5	61	0.0042744	0.254439	0.369255	0.432674
Signaling by NOTCH4	7	92	0.00644664	0.254934	0.369255	0.432674
Transport of Mature mRNA Derived from an Intronless Transcript	4	46	0.00322332	0.255021	0.369255	0.432674
RAS processing	4	46	0.00322332	0.255021	0.369255	0.432674
NS1 Mediated Effects on Host Pathways	4	46	0.00322332	0.255021	0.369255	0.432674
RIPK1-mediated regulated necrosis	4	46	0.00322332	0.255021	0.369255	0.432674
Deubiquitination	19	289	0.0202509	0.262599	0.369255	0.432674
Suppression of phagosomal maturation	3	32	0.00224231	0.264069	0.369255	0.432674
Signaling by FLT3 fusion proteins	3	32	0.00224231	0.264069	0.369255	0.432674
IRAK2 mediated activation of TAK1 complex upon TLR7/8 or 9 stimulation	2	18	0.0012613	0.264783	0.369255	0.432674
Synthesis And Processing Of GAG, GAGPOL Polyproteins	2	18	0.0012613	0.264783	0.369255	0.432674
MAP3K8 (TPL2)-dependent MAPK1/3 activation	2	18	0.0012613	0.264783	0.369255	0.432674
Degradation of GLI1 by the proteasome	5	62	0.00434447	0.264833	0.369255	0.432674
Degradation of GLI2 by the proteasome	5	62	0.00434447	0.264833	0.369255	0.432674
GLI3 is processed to GLI3R by the proteasome	5	62	0.00434447	0.264833	0.369255	0.432674
Mitochondrial translation termination	7	94	0.00658678	0.271759	0.369255	0.432674
Mitochondrial translation elongation	7	94	0.00658678	0.271759	0.369255	0.432674
Activation of NOXA and translocation to mitochondria	1	6	0.000420433	0.28387	0.369255	0.432674
SUMO is proteolytically processed	1	6	0.000420433	0.28387	0.369255	0.432674
TRAF6-mediated induction of TAK1 complex within TLR4 complex	2	19	0.00133137	0.285253	0.369255	0.432674
Sema3A PAK dependent Axon repulsion	2	19	0.00133137	0.285253	0.369255	0.432674
Protein repair	2	19	0.00133137	0.285253	0.369255	0.432674
InlB-mediated entry of Listeria monocytogenes into host cell	2	19	0.00133137	0.285253	0.369255	0.432674
TGF-beta receptor signaling in EMT (epithelial to mesenchymal transition)	2	19	0.00133137	0.285253	0.369255	0.432674
TICAM1, RIP1-mediated IKK complex recruitment	2	19	0.00133137	0.285253	0.369255	0.432674
Spry regulation of FGF signaling	2	19	0.00133137	0.285253	0.369255	0.432674
p75NTR signals via NF-kB	2	19	0.00133137	0.285253	0.369255	0.432674
Hh mutants abrogate ligand secretion	5	64	0.00448462	0.285892	0.369255	0.432674
Mitochondrial translation initiation	7	96	0.00672693	0.288866	0.369255	0.432674
Telomere Extension By Telomerase	3	34	0.00238245	0.293996	0.369255	0.432674
Pyroptosis	3	34	0.00238245	0.293996	0.369255	0.432674
Cell death signalling via NRAGE, NRIF and NADE	6	81	0.00567585	0.29796	0.369255	0.432674
RNA Polymerase I Transcription Initiation	4	50	0.00350361	0.303945	0.369255	0.432674
Activation of IRF3/IRF7 mediated by TBK1/IKK epsilon	2	20	0.00140144	0.305664	0.369255	0.432674
Negative regulation of FLT3	2	20	0.00140144	0.305664	0.369255	0.432674
Defective CFTR causes cystic fibrosis	5	66	0.00462476	0.307246	0.369255	0.432674
Asymmetric localization of PCP proteins	5	66	0.00462476	0.307246	0.369255	0.432674
Dectin-1 mediated noncanonical NF-kB signaling	5	66	0.00462476	0.307246	0.369255	0.432674
Late endosomal microautophagy	3	35	0.00245253	0.309046	0.369255	0.432674
Defective SLC16A1 causes symptomatic deficiency in lactate transport (SDLT)	1	7	0.000490505	0.322643	0.369255	0.432674
Loss of phosphorylation of MECP2 at T308	1	7	0.000490505	0.322643	0.369255	0.432674
DEx/H-box helicases activate type I IFN and inflammatory cytokines production	1	7	0.000490505	0.322643	0.369255	0.432674
LRR FLII-interacting protein 1 (LRRFIP1) activates type I IFN production	1	7	0.000490505	0.322643	0.369255	0.432674
Regulation of expression of SLITs and ROBOs	12	183	0.0128232	0.323443	0.369255	0.432674
NOTCH3 Intracellular Domain Regulates Transcription	3	36	0.0025226	0.324121	0.369255	0.432674
Regulation of innate immune responses to cytosolic DNA	2	21	0.00147152	0.325962	0.369255	0.432674
STAT5 activation downstream of FLT3 ITD mutants	2	21	0.00147152	0.325962	0.369255	0.432674
Transcriptional regulation of testis differentiation	2	21	0.00147152	0.325962	0.369255	0.432674
EPHB-mediated forward signaling	4	52	0.00364375	0.328799	0.369255	0.432674
Signaling by ERBB2	5	68	0.00476491	0.328818	0.369255	0.432674
Formation of the HIV-1 Early Elongation Complex	3	37	0.00259267	0.339196	0.369255	0.432674
Formation of the Early Elongation Complex	3	37	0.00259267	0.339196	0.369255	0.432674
Budding and maturation of HIV virion	3	37	0.00259267	0.339196	0.369255	0.432674
Negative regulators of DDX58/IFIH1 signaling	3	37	0.00259267	0.339196	0.369255	0.432674
Tetrahydrobiopterin (BH4) synthesis, recycling, salvage and regulation	3	37	0.00259267	0.339196	0.369255	0.432674
Mitochondrial protein import	5	69	0.00483498	0.339662	0.369255	0.432674
Detoxification of Reactive Oxygen Species	5	69	0.00483498	0.339662	0.369255	0.432674
NEP/NS2 Interacts with the Cellular Export Machinery	4	53	0.00371383	0.341272	0.369255	0.432674
Mitochondrial translation	7	102	0.00714736	0.341466	0.369255	0.432674
Constitutive Signaling by EGFRvIII	2	22	0.00154159	0.346099	0.369255	0.432674
Signaling by EGFRvIII in Cancer	2	22	0.00154159	0.346099	0.369255	0.432674
Regulation of FZD by ubiquitination	2	22	0.00154159	0.346099	0.369255	0.432674
PINK1-PRKN Mediated Mitophagy	2	22	0.00154159	0.346099	0.369255	0.432674
Signaling by Hippo	2	22	0.00154159	0.346099	0.369255	0.432674
Glycogen storage diseases	2	22	0.00154159	0.346099	0.369255	0.432674
Export of Viral Ribonucleoproteins from Nucleus	4	54	0.0037839	0.353759	0.369255	0.432674
SMAD2/SMAD3:SMAD4 heterotrimer regulates transcription	3	38	0.00266274	0.354247	0.369255	0.432674
Plus-strand DNA synthesis	1	8	0.000560577	0.359319	0.369255	0.432674
PTK6 Regulates Cell Cycle	1	8	0.000560577	0.359319	0.369255	0.432674
Noncanonical activation of NOTCH3	1	8	0.000560577	0.359319	0.369255	0.432674
Aryl hydrocarbon receptor signalling	1	8	0.000560577	0.359319	0.369255	0.432674
Pentose phosphate pathway disease	1	8	0.000560577	0.359319	0.369255	0.432674
Cam-PDE 1 activation	1	8	0.000560577	0.359319	0.369255	0.432674
Release of apoptotic factors from the mitochondria	1	8	0.000560577	0.359319	0.369255	0.432674
Signaling by MST1	1	8	0.000560577	0.359319	0.369255	0.432674
Diseases of Base Excision Repair	1	8	0.000560577	0.359319	0.369255	0.432674
Transcriptional activation of mitochondrial biogenesis	6	88	0.00616635	0.365755	0.369255	0.432674
Signaling by ERBB2 ECD mutants	2	23	0.00161166	0.366033	0.369255	0.432674
Cytosolic iron-sulfur cluster assembly	2	23	0.00161166	0.366033	0.369255	0.432674
FOXO-mediated transcription of cell death genes	2	23	0.00161166	0.366033	0.369255	0.432674
NOTCH2 Activation and Transmission of Signal to the Nucleus	2	23	0.00161166	0.366033	0.369255	0.432674
RUNX1 interacts with co-factors whose precise effect on RUNX1 targets is not known	3	39	0.00273281	0.369255	0.369255	0.432674
SUMOylation of SUMOylation proteins	3	39	0.00273281	0.369255	0.369255	0.432674
Regulation of MECP2 expression and activity	3	39	0.00273281	0.369255	0.369255	0.432674
Regulation of TP53 Activity through Acetylation	3	39	0.00273281	0.369255	0.369255	0.432674
Activation of NF-kappaB in B cells	5	72	0.0050452	0.372316	0.372316	0.429089
Hedgehog ligand biogenesis	5	72	0.0050452	0.372316	0.372316	0.429089
MAPK6/MAPK4 signaling	7	106	0.00742765	0.377185	0.377185	0.423446
Formation of TC-NER Pre-Incision Complex	4	56	0.00392404	0.378719	0.378719	0.421683
DNA Damage Recognition in GG-NER	3	40	0.00280289	0.384198	0.384198	0.415445
IKK complex recruitment mediated by RIP1	2	24	0.00168173	0.385729	0.385729	0.413718
Signaling by FGFR	7	107	0.00749772	0.38615	0.38615	0.413244
Uncoating of the HIV Virion	1	9	0.00063065	0.394011	0.394011	0.404491
RAS signaling downstream of NF1 loss-of-function variants	1	9	0.00063065	0.394011	0.394011	0.404491
MET Receptor Activation	1	9	0.00063065	0.394011	0.394011	0.404491
RAF activation	3	41	0.00287296	0.399058	0.399058	0.398964
Signal Transduction	170	2997	0.210006	0.402088	0.402088	0.395678
Hedgehog 'on' state	6	92	0.00644664	0.404913	0.404913	0.392639
Sema4D induced cell migration and growth-cone collapse	2	25	0.0017518	0.405151	0.405151	0.392383
FOXO-mediated transcription	7	110	0.00770794	0.413055	0.413055	0.383992
Triglyceride catabolism	3	42	0.00294303	0.413818	0.413818	0.383191
RHO GTPase cycle	27	460	0.0322332	0.415872	0.415872	0.381041
Basigin interactions	2	26	0.00182188	0.424274	0.424274	0.372353
Prevention of phagosomal-lysosomal fusion	2	26	0.00182188	0.424274	0.424274	0.372353
Glycogen synthesis	2	26	0.00182188	0.424274	0.424274	0.372353
RUNX3 regulates WNT signaling	1	10	0.000700722	0.426827	0.426827	0.369748
Binding of TCF/LEF:CTNNB1 to target gene promoters	1	10	0.000700722	0.426827	0.426827	0.369748
SHOC2 M1731 mutant abolishes MRAS complex function	1	10	0.000700722	0.426827	0.426827	0.369748
SOS-mediated signalling	1	10	0.000700722	0.426827	0.426827	0.369748
NR1H2 & NR1H3 regulate gene expression to limit cholesterol uptake	1	10	0.000700722	0.426827	0.426827	0.369748
Activation of PUMA and translocation to mitochondria	1	10	0.000700722	0.426827	0.426827	0.369748
Insulin effects increased synthesis of Xylulose-5-Phosphate	1	10	0.000700722	0.426827	0.426827	0.369748
Glycoprotein hormones	1	10	0.000700722	0.426827	0.426827	0.369748
Uptake and function of diphtheria toxin	1	10	0.000700722	0.426827	0.426827	0.369748
Glycogen metabolism	3	43	0.0030131	0.42846	0.42846	0.368089
RHOG GTPase cycle	5	78	0.00546563	0.437405	0.437405	0.359116
Signaling by EGFR	4	61	0.0042744	0.440488	0.440488	0.356066
Ras activation upon Ca2+ influx through NMDA receptor	2	27	0.00189195	0.443072	0.443072	0.353526
Listeria monocytogenes entry into host cells	2	27	0.00189195	0.443072	0.443072	0.353526
Mitochondrial calcium ion transport	2	27	0.00189195	0.443072	0.443072	0.353526
RHO GTPases activate PAKs	2	27	0.00189195	0.443072	0.443072	0.353526
Metabolism of nucleotides	15	256	0.0179385	0.455548	0.455548	0.341466
Reverse Transcription of HIV RNA	1	11	0.000770794	0.457868	0.457868	0.339259
Apoptotic cleavage of cell adhesion proteins	1	11	0.000770794	0.457868	0.457868	0.339259
Minus-strand DNA synthesis	1	11	0.000770794	0.457868	0.457868	0.339259
Formation of annular gap junctions	1	11	0.000770794	0.457868	0.457868	0.339259
Signaling by MRAS-complex mutants	1	11	0.000770794	0.457868	0.457868	0.339259
Gain-of-function MRAS complexes activate RAF signaling	1	11	0.000770794	0.457868	0.457868	0.339259
Activation of RAS in B cells	1	11	0.000770794	0.457868	0.457868	0.339259
RUNX1 regulates transcription of genes involved in differentiation of myeloid cells	1	11	0.000770794	0.457868	0.457868	0.339259
Metabolism of polyamines	5	80	0.00560577	0.45881	0.45881	0.338367
mTORC1-mediated signalling	2	28	0.00196202	0.461525	0.461525	0.335805
TP53 regulates transcription of several additional cell death genes whose specific roles in p53-dependent apoptosis remain uncertain	2	28	0.00196202	0.461525	0.461525	0.335805
PCP/CE pathway	6	99	0.00693715	0.472771	0.472771	0.325349
Ketone body metabolism	2	29	0.00203209	0.479614	0.479614	0.319108
Signaling by ERBB4	5	82	0.00574592	0.479977	0.479977	0.31878
PTEN Regulation	10	171	0.0119823	0.480393	0.480393	0.318404
DDX58/IFIH1-mediated induction of interferon-alpha/beta	6	100	0.00700722	0.48231	0.48231	0.316674
Metabolism of folate and pterines	3	47	0.00329339	0.485572	0.485572	0.313747
Antigen processing: Ubiquitination & Proteasome degradation	18	315	0.0220727	0.487024	0.487024	0.31245
Gap junction degradation	1	12	0.000840866	0.48723	0.48723	0.312266
Proton-coupled monocarboxylate transport	1	12	0.000840866	0.48723	0.48723	0.312266
Activation of RAC1 downstream of NMDARs	1	12	0.000840866	0.48723	0.48723	0.312266
Caspase activation via Dependence Receptors in the absence of ligand	1	12	0.000840866	0.48723	0.48723	0.312266
Estrogen-stimulated signaling through PRKCZ	1	12	0.000840866	0.48723	0.48723	0.312266
VLDLR internalisation and degradation	1	12	0.000840866	0.48723	0.48723	0.312266
Activation of the TFAP2 (AP-2) family of transcription factors	1	12	0.000840866	0.48723	0.48723	0.312266
CD209 (DC-SIGN) signaling	2	30	0.00210217	0.497325	0.497325	0.30336
Signaling by ERBB2 TMD/JMD mutants	2	30	0.00210217	0.497325	0.497325	0.30336
Transport of Ribonucleoproteins into the Host Nucleus	3	48	0.00336346	0.499423	0.499423	0.301532
FLT3 Signaling	3	48	0.00336346	0.499423	0.499423	0.301532
Signaling by ALK fusions and activated point mutants	4	66	0.00462476	0.500327	0.500327	0.300746
Signaling by ALK in cancer	4	66	0.00462476	0.500327	0.500327	0.300746
Signaling by Interleukins	36	643	0.0450564	0.508377	0.508377	0.293814
Signaling by RAF1 mutants	3	49	0.00343354	0.513082	0.513082	0.289813
Smooth Muscle Contraction	3	49	0.00343354	0.513082	0.513082	0.289813
Negative regulation of MAPK pathway	3	49	0.00343354	0.513082	0.513082	0.289813
MicroRNA (miRNA) biogenesis	2	31	0.00217224	0.514646	0.514646	0.288492
Sema4D in semaphorin signaling	2	31	0.00217224	0.514646	0.514646	0.288492
VEGFR2 mediated cell proliferation	2	31	0.00217224	0.514646	0.514646	0.288492
Mitophagy	2	31	0.00217224	0.514646	0.514646	0.288492
Binding and entry of HIV virion	1	13	0.000910938	0.515004	0.515004	0.288189
Activation of Ca-permeable Kainate Receptor	1	13	0.000910938	0.515004	0.515004	0.288189
Insulin-like Growth Factor-2 mRNA Binding Proteins (IGF2BPs/IMPs/VICKZs) bind RNA	1	13	0.000910938	0.515004	0.515004	0.288189
MAPK3 (ERK1) activation	1	13	0.000910938	0.515004	0.515004	0.288189
Peptide hormone biosynthesis	1	13	0.000910938	0.515004	0.515004	0.288189
Hormone ligand-binding receptors	1	13	0.000910938	0.515004	0.515004	0.288189
EGFR Transactivation by Gastrin	1	13	0.000910938	0.515004	0.515004	0.288189
Interleukin-27 signaling	1	13	0.000910938	0.515004	0.515004	0.288189
Metabolism of cofactors	4	68	0.00476491	0.523484	0.523484	0.281096
Platelet degranulation	8	141	0.00988018	0.525779	0.525779	0.279197
Neurotransmitter receptors and postsynaptic signal transmission	13	232	0.0162567	0.527554	0.527554	0.277733
Regulation of cholesterol biosynthesis by SREBP (SREBF)	5	87	0.00609628	0.531543	0.531543	0.274462
Activated NOTCH1 Transmits Signal to the Nucleus	2	32	0.00224231	0.531567	0.531567	0.274442
Nucleotide salvage	4	69	0.00483498	0.534868	0.534868	0.271753
Nonsense-Mediated Decay (NMD)	7	124	0.00868895	0.535731	0.535731	0.271054
Nonsense Mediated Decay (NMD) enhanced by the Exon Junction Complex (EJC)	7	124	0.00868895	0.535731	0.535731	0.271054
Signaling by FGFR4	3	51	0.00357368	0.539791	0.539791	0.267774
Ionotropic activity of kainate receptors	1	14	0.00098101	0.541275	0.541275	0.266582
vRNP Assembly	1	14	0.00098101	0.541275	0.541275	0.266582
Regulation of localization of FOXO transcription factors	1	14	0.00098101	0.541275	0.541275	0.266582
Cholesterol biosynthesis via desmosterol	1	14	0.00098101	0.541275	0.541275	0.266582
Activated NTRK3 signals through RAS	1	14	0.00098101	0.541275	0.541275	0.266582
Cholesterol biosynthesis via lathosterol	1	14	0.00098101	0.541275	0.541275	0.266582
Suppression of apoptosis	1	14	0.00098101	0.541275	0.541275	0.266582
CD163 mediating an anti-inflammatory response	1	14	0.00098101	0.541275	0.541275	0.266582
Signaling by MET	5	88	0.00616635	0.541583	0.541583	0.266335
Signaling by ROBO receptors	13	235	0.016467	0.546067	0.546067	0.262754
tRNA processing in the nucleus	4	70	0.00490505	0.546115	0.546115	0.262716
Regulation of PTEN gene transcription	4	70	0.00490505	0.546115	0.546115	0.262716
RNA Polymerase I Transcription Termination	2	33	0.00231238	0.548081	0.548081	0.261155
Downregulation of SMAD2/3:SMAD4 transcriptional activity	2	33	0.00231238	0.548081	0.548081	0.261155
EPHA-mediated growth cone collapse	2	33	0.00231238	0.548081	0.548081	0.261155
ER Quality Control Compartment (ERQC)	2	33	0.00231238	0.548081	0.548081	0.261155
Transport of nucleosides and free purine and pyrimidine bases across the plasma membrane	2	33	0.00231238	0.548081	0.548081	0.261155
Semaphorin interactions	4	71	0.00497512	0.557219	0.557219	0.253974
Transport to the Golgi and subsequent modification	12	219	0.0153458	0.560373	0.560373	0.251523
ATF4 activates genes in response to endoplasmic reticulum stress	2	34	0.00238245	0.564182	0.564182	0.248581
Negative regulation of FGFR3 signaling	2	34	0.00238245	0.564182	0.564182	0.248581
Pyrimidine salvage	2	34	0.00238245	0.564182	0.564182	0.248581
Post-translational protein phosphorylation	6	109	0.00763787	0.565267	0.565267	0.247746
Interleukin-1 signaling	6	109	0.00763787	0.565267	0.565267	0.247746
Cross-presentation of soluble exogenous antigens (endosomes)	3	53	0.00371383	0.565639	0.565639	0.247461
Signaling by FGFR3	3	53	0.00371383	0.565639	0.565639	0.247461
Reduction of cytosolic Ca++ levels	1	15	0.00105108	0.566125	0.566125	0.247088
Activated NTRK2 signals through RAS	1	15	0.00105108	0.566125	0.566125	0.247088
Sensing of DNA Double Strand Breaks	1	15	0.00105108	0.566125	0.566125	0.247088
p75 NTR receptor-mediated signalling	6	110	0.00770794	0.574096	0.574096	0.241016
Signaling by RAS mutants	3	54	0.0037839	0.578224	0.578224	0.237904
Signaling downstream of RAS mutants	3	54	0.0037839	0.578224	0.578224	0.237904
Paradoxical activation of RAF signaling by kinase inactive BRAF	3	54	0.0037839	0.578224	0.578224	0.237904
Signaling by moderate kinase activity BRAF mutants	3	54	0.0037839	0.578224	0.578224	0.237904
Endosomal Sorting Complex Required For Transport (ESCRT)	2	35	0.00245253	0.579867	0.579867	0.236672
Signaling by ERBB2 KD Mutants	2	35	0.00245253	0.579867	0.579867	0.236672
DARPP-32 events	2	35	0.00245253	0.579867	0.579867	0.236672
Negative regulation of FGFR4 signaling	2	35	0.00245253	0.579867	0.579867	0.236672
Response to elevated platelet cytosolic Ca2+	8	148	0.0103707	0.580112	0.580112	0.236488
RAC2 GTPase cycle	5	92	0.00644664	0.58069	0.58069	0.236056
Scavenging by Class F Receptors	1	16	0.00112115	0.58963	0.58963	0.22942
RUNX3 regulates NOTCH signaling	1	16	0.00112115	0.58963	0.58963	0.22942
SUMOylation of DNA methylation proteins	1	16	0.00112115	0.58963	0.58963	0.22942
GRB2 events in EGFR signaling	1	16	0.00112115	0.58963	0.58963	0.22942
MET activates RAS signaling	1	16	0.00112115	0.58963	0.58963	0.22942
Trafficking and processing of endosomal TLR	1	16	0.00112115	0.58963	0.58963	0.22942
IRAK1 recruits IKK complex	1	16	0.00112115	0.58963	0.58963	0.22942
Beta oxidation of myristoyl-CoA to lauroyl-CoA	1	16	0.00112115	0.58963	0.58963	0.22942
IRAK1 recruits IKK complex upon TLR7/8 or 9 stimulation	1	16	0.00112115	0.58963	0.58963	0.22942
Disorders of Nervous System Development	1	16	0.00112115	0.58963	0.58963	0.22942
Disorders of Developmental Biology	1	16	0.00112115	0.58963	0.58963	0.22942
SHC-related events triggered by IGF1R	1	16	0.00112115	0.58963	0.58963	0.22942
Loss of function of MECP2 in Rett syndrome	1	16	0.00112115	0.58963	0.58963	0.22942
Pervasive developmental disorders	1	16	0.00112115	0.58963	0.58963	0.22942
Activated NTRK2 signals through FRS2 and FRS3	1	16	0.00112115	0.58963	0.58963	0.22942
AKT phosphorylates targets in the cytosol	1	16	0.00112115	0.58963	0.58963	0.22942
Defective TPR may confer susceptibility towards thyroid papillary carcinoma (TPC)	2	36	0.0025226	0.595132	0.595132	0.225386
Signaling by ERBB2 in Cancer	2	36	0.0025226	0.595132	0.595132	0.225386
Membrane Trafficking	36	667	0.0467381	0.597508	0.597508	0.223656
eNOS activation	2	37	0.00259267	0.609979	0.609979	0.214685
EGFR downregulation	2	37	0.00259267	0.609979	0.609979	0.214685
Sensory processing of sound by inner hair cells of the cochlea	4	76	0.00532549	0.610443	0.610443	0.214355
CREB1 phosphorylation through the activation of Adenylate Cyclase	1	17	0.00119123	0.611863	0.611863	0.213346
IL-6-type cytokine receptor ligand interactions	1	17	0.00119123	0.611863	0.611863	0.213346
TRAF6 mediated IRF7 activation in TLR7/8 or 9 signaling	1	17	0.00119123	0.611863	0.611863	0.213346
Processing of SMDT1	1	17	0.00119123	0.611863	0.611863	0.213346
Signaling by FGFR3 fusions in cancer	1	17	0.00119123	0.611863	0.611863	0.213346
NOTCH1 Intracellular Domain Regulates Transcription	3	57	0.00399411	0.614574	0.614574	0.211426
Transcriptional activity of SMAD2/SMAD3:SMAD4 heterotrimer	3	57	0.00399411	0.614574	0.614574	0.211426
Hemostasis	43	803	0.056268	0.623538	0.623538	0.205137
RHOH GTPase cycle	2	38	0.00266274	0.624407	0.624407	0.204532
Signaling by NOTCH2	2	38	0.00266274	0.624407	0.624407	0.204532
Signaling by WNT in cancer	2	38	0.00266274	0.624407	0.624407	0.204532
Cytosolic sensors of pathogen-associated DNA	4	78	0.00546563	0.630595	0.630595	0.200249
CLEC7A (Dectin-1) induces NFAT activation	1	18	0.0012613	0.632894	0.632894	0.198669
Hyaluronan uptake and degradation	1	18	0.0012613	0.632894	0.632894	0.198669
TRAF3-dependent IRF activation pathway	1	18	0.0012613	0.632894	0.632894	0.198669
Beta oxidation of lauroyl-CoA to decanoyl-CoA-CoA	1	18	0.0012613	0.632894	0.632894	0.198669
Biosynthesis of E-series 18(R)-resolvins	1	18	0.0012613	0.632894	0.632894	0.198669
Signaling by FGFR4 in disease	1	18	0.0012613	0.632894	0.632894	0.198669
RHOJ GTPase cycle	3	59	0.00413426	0.637605	0.637605	0.195449
RHOV GTPase cycle	2	39	0.00273281	0.638418	0.638418	0.194895
TAK1 activates NFkB by phosphorylation and activation of IKKs complex	2	39	0.00273281	0.638418	0.638418	0.194895
CREB1 phosphorylation through NMDA receptor-mediated activation of RAS signaling	2	39	0.00273281	0.638418	0.638418	0.194895
Negative regulation of FGFR1 signaling	2	39	0.00273281	0.638418	0.638418	0.194895
ABC transporter disorders	5	99	0.00693715	0.644558	0.644558	0.190738
Striated Muscle Contraction	2	40	0.00280289	0.652014	0.652014	0.185743
Regulation of Glucokinase by Glucokinase Regulatory Protein	2	40	0.00280289	0.652014	0.652014	0.185743
Adenylate cyclase inhibitory pathway	1	19	0.00133137	0.652786	0.652786	0.185229
p38MAPK events	1	19	0.00133137	0.652786	0.652786	0.185229
Synthesis of 12-eicosatetraenoic acid derivatives	1	19	0.00133137	0.652786	0.652786	0.185229
RIP-mediated NFkB activation via ZBP1	1	19	0.00133137	0.652786	0.652786	0.185229
Tristetraprolin (TTP, ZFP36) binds and destabilizes mRNA	1	19	0.00133137	0.652786	0.652786	0.185229
SHC1 events in EGFR signaling	1	19	0.00133137	0.652786	0.652786	0.185229
Butyrate Response Factor 1 (BRF1) binds and destabilizes mRNA	1	19	0.00133137	0.652786	0.652786	0.185229
Signaling by PDGFRA extracellular domain mutants	1	19	0.00133137	0.652786	0.652786	0.185229
Signaling by PDGFRA transmembrane, juxtamembrane and kinase domain mutants	1	19	0.00133137	0.652786	0.652786	0.185229
Erythropoietin activates RAS	1	19	0.00133137	0.652786	0.652786	0.185229
Protein methylation	1	19	0.00133137	0.652786	0.652786	0.185229
Cell-extracellular matrix interactions	1	19	0.00133137	0.652786	0.652786	0.185229
RAC3 GTPase cycle	5	100	0.00700722	0.653168	0.653168	0.184975
CLEC7A (Dectin-1) signaling	6	120	0.00840866	0.65707	0.65707	0.182389
SARS-CoV Infections	11	217	0.0152057	0.662054	0.662054	0.179106
Cooperation of PDCL (PhLP1) and TRiC/CCT in G-protein beta folding	2	41	0.00287296	0.665201	0.665201	0.177047
Metabolism of nitric oxide: NOS3 activation and regulation	2	41	0.00287296	0.665201	0.665201	0.177047
Negative regulation of FGFR2 signaling	2	41	0.00287296	0.665201	0.665201	0.177047
Calnexin/calreticulin cycle	2	41	0.00287296	0.665201	0.665201	0.177047
Regulation of TNFR1 signaling	2	41	0.00287296	0.665201	0.665201	0.177047
EPH-Ephrin signaling	5	102	0.00714736	0.669984	0.669984	0.173936
Translation initiation complex formation	3	62	0.00434447	0.67031	0.67031	0.173724
Signaling by FGFR1	3	62	0.00434447	0.67031	0.67031	0.173724
SUMOylation of transcription factors	1	20	0.00140144	0.671601	0.671601	0.172889
Regulation of gene expression in late stage (branching morphogenesis) pancreatic bud precursor cells	1	20	0.00140144	0.671601	0.671601	0.172889
KSRP (KHSRP) binds and destabilizes mRNA	1	20	0.00140144	0.671601	0.671601	0.172889
PTK6 Regulates RHO GTPases, RAS GTPase and MAP kinases	1	20	0.00140144	0.671601	0.671601	0.172889
Acetylcholine regulates insulin secretion	1	20	0.00140144	0.671601	0.671601	0.172889
Influenza Infection	10	200	0.0140144	0.674753	0.674753	0.170855
PERK regulates gene expression	2	42	0.00294303	0.677981	0.677981	0.168782
TNFR2 non-canonical NF-kB pathway	5	104	0.00728751	0.686256	0.686256	0.163514
GRB2 events in ERBB2 signaling	1	21	0.00147152	0.689398	0.689398	0.16153
mitochondrial fatty acid beta-oxidation of unsaturated fatty acids	1	21	0.00147152	0.689398	0.689398	0.16153
SHC1 events in ERBB4 signaling	1	21	0.00147152	0.689398	0.689398	0.16153
GDP-fucose biosynthesis	1	21	0.00147152	0.689398	0.689398	0.16153
TFAP2 (AP-2) family regulates transcription of growth factors and their receptors	1	21	0.00147152	0.689398	0.689398	0.16153
CaM pathway	2	43	0.0030131	0.690361	0.690361	0.160924
Calmodulin induced events	2	43	0.0030131	0.690361	0.690361	0.160924
SUMOylation of ubiquitinylation proteins	2	43	0.0030131	0.690361	0.690361	0.160924
Ribosomal scanning and start codon recognition	3	64	0.00448462	0.690882	0.690882	0.160596
Sensory processing of sound by outer hair cells of the cochlea	3	64	0.00448462	0.690882	0.690882	0.160596
Circadian Clock	5	105	0.00735758	0.694185	0.694185	0.158525
NR1H2 and NR1H3-mediated signaling	4	85	0.00595613	0.695688	0.695688	0.157586
Axon guidance	30	585	0.0409922	0.700566	0.700566	0.154551
Signaling by high-kinase activity BRAF mutants	2	44	0.00308318	0.702346	0.702346	0.153449
RND2 GTPase cycle	2	44	0.00308318	0.702346	0.702346	0.153449
VEGFR2 mediated vascular permeability	2	44	0.00308318	0.702346	0.702346	0.153449
Synthesis, secretion, and inactivation of Glucagon-like Peptide-1 (GLP-1)	2	44	0.00308318	0.702346	0.702346	0.153449
Beta-catenin independent WNT signaling	8	166	0.011632	0.704437	0.704437	0.152158
Synthesis of 15-eicosatetraenoic acid derivatives	1	22	0.00154159	0.706232	0.706232	0.151053
Metabolism of ingested H2SeO4 and H2SeO3 into H2Se	1	22	0.00154159	0.706232	0.706232	0.151053
Synthesis, secretion, and inactivation of Glucose-dependent Insulinotropic Polypeptide (GIP)	1	22	0.00154159	0.706232	0.706232	0.151053
Biosynthesis of aspirin-triggered D-series resolvins	1	22	0.00154159	0.706232	0.706232	0.151053
Vitamin D (calciferol) metabolism	1	22	0.00154159	0.706232	0.706232	0.151053
Uptake and function of anthrax toxins	1	22	0.00154159	0.706232	0.706232	0.151053
Regulation of Insulin-like Growth Factor (IGF) transport and uptake by Insulin-like Growth Factor Binding Proteins (IGFBPs)	6	127	0.00889917	0.708791	0.708791	0.149482
Activation of the mRNA upon binding of the cap-binding complex and eIFs, and subsequent binding to 43S	3	66	0.00462476	0.710473	0.710473	0.148453
NR1H3 & NR1H2 regulate gene expression linked to cholesterol transport and efflux	3	66	0.00462476	0.710473	0.710473	0.148453
Triglyceride metabolism	3	66	0.00462476	0.710473	0.710473	0.148453
Sensory processing of sound	4	87	0.00609628	0.712699	0.712699	0.147094
Purine salvage	2	45	0.00315325	0.713943	0.713943	0.146337
Regulation of beta-cell development	3	67	0.00469484	0.719904	0.719904	0.142726
RNA Polymerase III Transcription Termination	1	23	0.00161166	0.722155	0.722155	0.14137
PKA activation	1	23	0.00161166	0.722155	0.722155	0.14137
Hyaluronan metabolism	1	23	0.00161166	0.722155	0.722155	0.14137
Synaptic adhesion-like molecules	1	23	0.00161166	0.722155	0.722155	0.14137
ZBP1(DAI) mediated induction of type I IFNs	1	23	0.00161166	0.722155	0.722155	0.14137
Tie2 Signaling	1	23	0.00161166	0.722155	0.722155	0.14137
Transcriptional regulation of white adipocyte differentiation	5	109	0.00763787	0.724516	0.724516	0.139952
Post-translational protein modification	84	1598	0.111975	0.72556	0.72556	0.139327
Protein localization	8	170	0.0119123	0.728537	0.728537	0.137548
Constitutive Signaling by NOTCH1 PEST Domain Mutants	3	68	0.00476491	0.729094	0.729094	0.137216
Constitutive Signaling by NOTCH1 HD+PEST Domain Mutants	3	68	0.00476491	0.729094	0.729094	0.137216
Signaling by NOTCH1 PEST Domain Mutants in Cancer	3	68	0.00476491	0.729094	0.729094	0.137216
Signaling by NOTCH1 HD+PEST Domain Mutants in Cancer	3	68	0.00476491	0.729094	0.729094	0.137216
Signaling by NOTCH1 in Cancer	3	68	0.00476491	0.729094	0.729094	0.137216
RAC1 GTPase cycle	9	191	0.0133838	0.734912	0.734912	0.133764
RNA Polymerase II Transcription Pre-Initiation And Promoter Opening	2	47	0.00329339	0.735999	0.735999	0.133123
Nuclear signaling by ERBB4	2	47	0.00329339	0.735999	0.735999	0.133123
Signaling by FGFR2 IIIa TM	1	24	0.00168173	0.737215	0.737215	0.132406
mRNA decay by 3' to 5' exoribonuclease	1	24	0.00168173	0.737215	0.737215	0.132406
Synthesis of 5-eicosatetraenoic acids	1	24	0.00168173	0.737215	0.737215	0.132406
Methionine salvage pathway	1	24	0.00168173	0.737215	0.737215	0.132406
Regulation of signaling by CBL	1	24	0.00168173	0.737215	0.737215	0.132406
The NLRP3 inflammasome	1	24	0.00168173	0.737215	0.737215	0.132406
Biosynthesis of E-series 18(S)-resolvins	1	24	0.00168173	0.737215	0.737215	0.132406
Gastrin-CREB signalling pathway via PKC and MAPK	1	24	0.00168173	0.737215	0.737215	0.132406
Other interleukin signaling	1	24	0.00168173	0.737215	0.737215	0.132406
Extra-nuclear estrogen signaling	5	111	0.00777801	0.738849	0.738849	0.131444
Ca-dependent events	2	48	0.00336346	0.746474	0.746474	0.126986
Incretin synthesis, secretion, and inactivation	2	48	0.00336346	0.746474	0.746474	0.126986
Insertion of tail-anchored proteins into the endoplasmic reticulum membrane	1	25	0.0017518	0.75146	0.75146	0.124094
BBSome-mediated cargo-targeting to cilium	1	25	0.0017518	0.75146	0.75146	0.124094
Serine biosynthesis	1	25	0.0017518	0.75146	0.75146	0.124094
Organic anion transporters	1	25	0.0017518	0.75146	0.75146	0.124094
Nephrin family interactions	1	25	0.0017518	0.75146	0.75146	0.124094
Activation of gene expression by SREBF (SREBP)	3	71	0.00497512	0.755246	0.755246	0.121912
rRNA modification in the nucleus and cytosol	3	71	0.00497512	0.755246	0.755246	0.121912
MAP2K and MAPK activation	2	49	0.00343354	0.756589	0.756589	0.12114
Translation of Structural Proteins	2	49	0.00343354	0.756589	0.756589	0.12114
Oncogenic MAPK signaling	4	93	0.00651671	0.759519	0.759519	0.119462
Viral Messenger RNA Synthesis	3	72	0.0050452	0.763499	0.763499	0.117192
MyD88 deficiency (TLR2/4)	1	26	0.00182188	0.764934	0.764934	0.116376
ADP signalling through P2Y purinoceptor 12	1	26	0.00182188	0.764934	0.764934	0.116376
JNK (c-Jun kinases) phosphorylation and activation mediated by activated human TAK1	1	26	0.00182188	0.764934	0.764934	0.116376
Signalling to RAS	1	26	0.00182188	0.764934	0.764934	0.116376
SHC-mediated cascade:FGFR3	1	26	0.00182188	0.764934	0.764934	0.116376
RORA activates gene expression	1	26	0.00182188	0.764934	0.764934	0.116376
Glycogen breakdown (glycogenolysis)	1	26	0.00182188	0.764934	0.764934	0.116376
PKA-mediated phosphorylation of CREB	1	26	0.00182188	0.764934	0.764934	0.116376
Synthesis, secretion, and deacylation of Ghrelin	1	26	0.00182188	0.764934	0.764934	0.116376
NOTCH4 Intracellular Domain Regulates Transcription	1	26	0.00182188	0.764934	0.764934	0.116376
Citric acid cycle (TCA cycle)	2	50	0.00350361	0.766354	0.766354	0.11557
MTOR signalling	2	50	0.00350361	0.766354	0.766354	0.11557
Signaling by BRAF and RAF1 fusions	3	73	0.00511527	0.771524	0.771524	0.112651
G-protein mediated events	3	73	0.00511527	0.771524	0.771524	0.112651
Translation of Structural Proteins	3	73	0.00511527	0.771524	0.771524	0.112651
TNF signaling	2	51	0.00357368	0.775777	0.775777	0.110263
Negative regulation of NMDA receptor-mediated neuronal transmission	1	27	0.00189195	0.777678	0.777678	0.1092
IRAK4 deficiency (TLR2/4)	1	27	0.00189195	0.777678	0.777678	0.1092
SHC-mediated cascade:FGFR4	1	27	0.00189195	0.777678	0.777678	0.1092
FRS-mediated FGFR3 signaling	1	27	0.00189195	0.777678	0.777678	0.1092
activated TAK1 mediates p38 MAPK activation	1	27	0.00189195	0.777678	0.777678	0.1092
Unblocking of NMDA receptors, glutamate binding and activation	1	27	0.00189195	0.777678	0.777678	0.1092
Metabolism of Angiotensinogen to Angiotensins	1	27	0.00189195	0.777678	0.777678	0.1092
Biosynthesis of D-series resolvins	1	27	0.00189195	0.777678	0.777678	0.1092
Signaling by PDGFR in disease	1	27	0.00189195	0.777678	0.777678	0.1092
Signaling by NTRK3 (TRKC)	1	27	0.00189195	0.777678	0.777678	0.1092
Cholesterol biosynthesis	3	74	0.00518534	0.779325	0.779325	0.108281
Neddylation	11	241	0.0168874	0.784004	0.784004	0.105682
RNA Polymerase II HIV Promoter Escape	2	52	0.00364375	0.784866	0.784866	0.105205
HIV Transcription Initiation	2	52	0.00364375	0.784866	0.784866	0.105205
RNA Polymerase II Transcription Initiation	2	52	0.00364375	0.784866	0.784866	0.105205
Notch-HLH transcription pathway	1	28	0.00196202	0.789733	0.789733	0.10252
FRS-mediated FGFR4 signaling	1	28	0.00196202	0.789733	0.789733	0.10252
Signaling by phosphorylated juxtamembrane, extracellular and kinase domain KIT mutants	1	28	0.00196202	0.789733	0.789733	0.10252
RAF-independent MAPK1/3 activation	1	28	0.00196202	0.789733	0.789733	0.10252
TP53 regulates transcription of additional cell cycle genes whose exact role in the p53 pathway remain uncertain	1	28	0.00196202	0.789733	0.789733	0.10252
Signaling by KIT in disease	1	28	0.00196202	0.789733	0.789733	0.10252
RNA Polymerase II Promoter Escape	2	53	0.00371383	0.793629	0.793629	0.100382
DAG and IP3 signaling	2	53	0.00371383	0.793629	0.793629	0.100382
RNA Pol II CTD phosphorylation and interaction with CE	1	29	0.00203209	0.801134	0.801134	0.0962949
RNA Pol II CTD phosphorylation and interaction with CE during HIV infection	1	29	0.00203209	0.801134	0.801134	0.0962949
Synthesis of pyrophosphates in the cytosol	1	29	0.00203209	0.801134	0.801134	0.0962949
Thyroxine biosynthesis	1	29	0.00203209	0.801134	0.801134	0.0962949
Estrogen-dependent nuclear events downstream of ESR-membrane signaling	1	29	0.00203209	0.801134	0.801134	0.0962949
Constitutive Signaling by AKT1 E17K in Cancer	1	29	0.00203209	0.801134	0.801134	0.0962949
ABC-family proteins mediated transport	5	122	0.00854881	0.807943	0.807943	0.0926193
Nervous system development	30	621	0.0435148	0.808685	0.808685	0.0922207
RNA Polymerase II Transcription Initiation And Promoter Clearance	2	55	0.00385397	0.810214	0.810214	0.0914005
TRP channels	1	30	0.00210217	0.811918	0.811918	0.090488
TRAF6 mediated NF-kB activation	1	30	0.00210217	0.811918	0.811918	0.090488
SHC-mediated cascade:FGFR1	1	30	0.00210217	0.811918	0.811918	0.090488
TNFR1-induced NFkappaB signaling pathway	1	30	0.00210217	0.811918	0.811918	0.090488
Interleukin-6 family signaling	1	30	0.00210217	0.811918	0.811918	0.090488
Insulin processing	1	30	0.00210217	0.811918	0.811918	0.090488
Signaling by BMP	1	30	0.00210217	0.811918	0.811918	0.090488
Long-term potentiation	1	31	0.00217224	0.822118	0.822118	0.0850661
FRS-mediated FGFR1 signaling	1	31	0.00217224	0.822118	0.822118	0.0850661
HDMs demethylate histones	1	31	0.00217224	0.822118	0.822118	0.0850661
Interleukin-7 signaling	1	31	0.00217224	0.822118	0.822118	0.0850661
Major pathway of rRNA processing in the nucleolus and cytosol	8	189	0.0132436	0.824464	0.824464	0.0838283
Signaling by the B Cell Receptor (BCR)	8	189	0.0132436	0.824464	0.824464	0.0838283
N-glycan trimming in the ER and Calnexin/Calreticulin cycle	2	57	0.00399411	0.825599	0.825599	0.0832308
Diseases of carbohydrate metabolism	3	81	0.00567585	0.827964	0.827964	0.0819885
Adrenaline,noradrenaline inhibits insulin secretion	1	32	0.00224231	0.831765	0.831765	0.0799994
Caspase activation via extrinsic apoptotic signalling pathway	1	32	0.00224231	0.831765	0.831765	0.0799994
Myogenesis	1	32	0.00224231	0.831765	0.831765	0.0799994
Ubiquinol biosynthesis	1	32	0.00224231	0.831765	0.831765	0.0799994
Signaling by FGFR2 in disease	2	58	0.00406419	0.832864	0.832864	0.0794262
VEGFA-VEGFR2 Pathway	5	127	0.00889917	0.834153	0.834153	0.0787545
Peptide hormone metabolism	5	127	0.00889917	0.834153	0.834153	0.0787545
TP53 Regulates Transcription of Cell Death Genes	3	83	0.00581599	0.840058	0.840058	0.0756908
Interaction between L1 and Ankyrins	1	33	0.00231238	0.84089	0.84089	0.075261
SHC-mediated cascade:FGFR2	1	33	0.00231238	0.84089	0.84089	0.075261
Biosynthesis of EPA-derived SPMs	1	33	0.00231238	0.84089	0.84089	0.075261
TP53 Regulates Transcription of Genes Involved in Cytochrome C Release	1	33	0.00231238	0.84089	0.84089	0.075261
Signaling by FGFR3 in disease	1	33	0.00231238	0.84089	0.84089	0.075261
Signaling by NTRK2 (TRKB)	1	33	0.00231238	0.84089	0.84089	0.075261
Signaling by FGFR3 point mutants in cancer	1	33	0.00231238	0.84089	0.84089	0.075261
Signaling by NOTCH1	3	84	0.00588606	0.845824	0.845824	0.0727198
Uptake and actions of bacterial toxins	2	60	0.00420433	0.846578	0.846578	0.072333
Neutrophil degranulation	22	480	0.0336346	0.848002	0.848002	0.0716033
Phase 0 - rapid depolarisation	1	34	0.00238245	0.84952	0.84952	0.0708264
Activation of kainate receptors upon glutamate binding	1	34	0.00238245	0.84952	0.84952	0.0708264
FRS-mediated FGFR2 signaling	1	34	0.00238245	0.84952	0.84952	0.0708264
Inflammasomes	1	34	0.00238245	0.84952	0.84952	0.0708264
HCMV Late Events	7	175	0.0122626	0.853959	0.853959	0.0685629
mRNA Capping	1	35	0.00245253	0.857683	0.857683	0.0666733
Downstream signaling of activated FGFR3	1	35	0.00245253	0.857683	0.857683	0.0666733
Adherens junctions interactions	1	35	0.00245253	0.857683	0.857683	0.0666733
Platelet calcium homeostasis	1	35	0.00245253	0.857683	0.857683	0.0666733
Signaling by Erythropoietin	1	35	0.00245253	0.857683	0.857683	0.0666733
Unfolded Protein Response (UPR)	6	155	0.0108612	0.860891	0.860891	0.0650517
RHOQ GTPase cycle	2	63	0.00441455	0.865238	0.865238	0.0628644
Regulation of TLR by endogenous ligand	1	36	0.0025226	0.865403	0.865403	0.0627814
SHC1 events in ERBB2 signaling	1	36	0.0025226	0.865403	0.865403	0.0627814
Downstream signaling of activated FGFR4	1	36	0.0025226	0.865403	0.865403	0.0627814
Maturation of spike protein	1	36	0.0025226	0.865403	0.865403	0.0627814
DAP12 signaling	1	36	0.0025226	0.865403	0.865403	0.0627814
Infection with Mycobacterium tuberculosis	5	135	0.00945974	0.869949	0.869949	0.0605064
Ion homeostasis	2	64	0.00448462	0.87098	0.87098	0.0599917
Downstream signal transduction	1	37	0.00259267	0.872706	0.872706	0.0591322
Opioid Signalling	4	113	0.00791816	0.873634	0.873634	0.0586704
CDC42 GTPase cycle	6	159	0.0111415	0.87605	0.87605	0.0574709
Death Receptor Signalling	6	159	0.0111415	0.87605	0.87605	0.0574709
C-type lectin receptors (CLRs)	8	203	0.0142247	0.876597	0.876597	0.0572002
Signaling by VEGF	5	138	0.00966996	0.88158	0.88158	0.0547384
Synthesis of IP3 and IP4 in the cytosol	1	39	0.00273281	0.886145	0.886145	0.0524954
PLC beta mediated events	2	67	0.00469484	0.886882	0.886882	0.052134
Peroxisomal protein import	2	67	0.00469484	0.886882	0.886882	0.052134
Infectious disease	66	1357	0.0950879	0.888453	0.888453	0.0513654
rRNA processing in the nucleus and cytosol	8	207	0.0145049	0.888913	0.888913	0.0511405
NOD1/2 Signaling Pathway	1	40	0.00280289	0.892323	0.892323	0.049478
SUMOylation of intracellular receptors	1	40	0.00280289	0.892323	0.892323	0.049478
MyD88 cascade initiated on plasma membrane	3	94	0.00658678	0.894203	0.894203	0.0485637
Toll Like Receptor 5 (TLR5) Cascade	3	94	0.00658678	0.894203	0.894203	0.0485637
Toll Like Receptor 10 (TLR10) Cascade	3	94	0.00658678	0.894203	0.894203	0.0485637
IRS-related events triggered by IGF1R	2	69	0.00483498	0.896454	0.896454	0.0474722
MAP kinase activation	2	69	0.00483498	0.896454	0.896454	0.0474722
Stimuli-sensing channels	4	119	0.00833859	0.897174	0.897174	0.0471233
RHO GTPases Activate WASPs and WAVEs	1	41	0.00287296	0.898166	0.898166	0.0466433
Signal amplification	1	41	0.00287296	0.898166	0.898166	0.0466433
Heme signaling	2	70	0.00490505	0.900951	0.900951	0.0452986
Interleukin-1 family signaling	6	167	0.0117021	0.902234	0.902234	0.0446807
Diseases of Immune System	1	42	0.00294303	0.903693	0.903693	0.0439792
Diseases associated with the TLR signaling cascade	1	42	0.00294303	0.903693	0.903693	0.0439792
Glutamate and glutamine metabolism	1	42	0.00294303	0.903693	0.903693	0.0439792
Downstream signaling of activated FGFR2	1	42	0.00294303	0.903693	0.903693	0.0439792
Downstream signaling of activated FGFR1	1	42	0.00294303	0.903693	0.903693	0.0439792
Signalling to ERKs	1	42	0.00294303	0.903693	0.903693	0.0439792
Plasma lipoprotein clearance	1	42	0.00294303	0.903693	0.903693	0.0439792
Vesicle-mediated transport	38	827	0.0579497	0.904947	0.904947	0.043377
Nucleotide-binding domain, leucine rich repeat containing receptor (NLR) signaling pathways	2	71	0.00497512	0.905267	0.905267	0.0432235
Ion transport by P-type ATPases	2	71	0.00497512	0.905267	0.905267	0.0432235
Signaling by ALK	1	43	0.0030131	0.90892	0.90892	0.0414744
RND3 GTPase cycle	1	43	0.0030131	0.90892	0.90892	0.0414744
RND1 GTPase cycle	1	43	0.0030131	0.90892	0.90892	0.0414744
FGFR2 mutant receptor activation	1	43	0.0030131	0.90892	0.90892	0.0414744
BMAL1:CLOCK,NPAS2 activates circadian gene expression	1	43	0.0030131	0.90892	0.90892	0.0414744
IGF1R signaling cascade	2	72	0.0050452	0.909405	0.909405	0.0412424
Signaling by Type 1 Insulin-like Growth Factor 1 Receptor (IGF1R)	2	73	0.00511527	0.913375	0.913375	0.0393511
Downstream TCR signaling	4	124	0.00868895	0.913753	0.913753	0.0391712
TRAF6 mediated IRF7 activation	1	44	0.00308318	0.913864	0.913864	0.0391186
Pyruvate metabolism and Citric Acid (TCA) cycle	3	100	0.00700722	0.916226	0.916226	0.0379976
Transcriptional Regulation by MECP2	3	100	0.00700722	0.916226	0.916226	0.0379976
ER-Phagosome pathway	6	173	0.0121225	0.918617	0.918617	0.0368655
TRAF6 mediated induction of NFkB and MAP kinases upon TLR7/8 or 9 activation	3	101	0.00707729	0.919462	0.919462	0.0364664
Toll Like Receptor 3 (TLR3) Cascade	3	102	0.00714736	0.922583	0.922583	0.0349945
MyD88 dependent cascade initiated on endosome	3	102	0.00714736	0.922583	0.922583	0.0349945
Pentose phosphate pathway	1	46	0.00322332	0.922961	0.922961	0.0348164
RNA Polymerase III Abortive And Retractive Initiation	1	46	0.00322332	0.922961	0.922961	0.0348164
RNA Polymerase III Transcription	1	46	0.00322332	0.922961	0.922961	0.0348164
Toll Like Receptor 7/8 (TLR7/8) Cascade	3	103	0.00721743	0.925594	0.925594	0.0335796
Interleukin-17 signaling	2	77	0.00539556	0.927675	0.927675	0.0326041
Adaptive Immune System	46	1005	0.0704225	0.929097	0.929097	0.0319388
Purine ribonucleoside monophosphate biosynthesis	1	48	0.00336346	0.9311	0.9311	0.0310039
Mitochondrial Fatty Acid Beta-Oxidation	3	105	0.00735758	0.931295	0.931295	0.0309127
Metabolism of proteins	108	2205	0.154509	0.933897	0.933897	0.0297008
Toll Like Receptor 9 (TLR9) Cascade	3	106	0.00742765	0.933993	0.933993	0.0296566
Scavenging by Class A Receptors	1	49	0.00343354	0.934841	0.934841	0.0292624
Signaling by FGFR1 in disease	1	49	0.00343354	0.934841	0.934841	0.0292624
TRIF(TICAM1)-mediated TLR4 signaling	3	107	0.00749772	0.936592	0.936592	0.0284495
MyD88-independent TLR4 cascade	3	107	0.00749772	0.936592	0.936592	0.0284495
Purine catabolism	2	80	0.00560577	0.936905	0.936905	0.0283043
Activation of GABAB receptors	1	50	0.00350361	0.938379	0.938379	0.0276218
GABA B receptor activation	1	50	0.00350361	0.938379	0.938379	0.0276218
Interleukin-3, Interleukin-5 and GM-CSF signaling	1	50	0.00350361	0.938379	0.938379	0.0276218
Ca2+ pathway	2	81	0.00567585	0.939726	0.939726	0.0269989
Pyrimidine catabolism	1	51	0.00357368	0.941725	0.941725	0.0260758
Signaling by SCF-KIT	1	51	0.00357368	0.941725	0.941725	0.0260758
Signaling by FGFR in disease	2	82	0.00574592	0.942426	0.942426	0.0257528
Transmission across Chemical Synapses	13	343	0.0240348	0.943709	0.943709	0.025162
Methylation	1	52	0.00364375	0.94489	0.94489	0.0246188
Iron uptake and transport	2	83	0.00581599	0.945011	0.945011	0.0245631
Class I MHC mediated antigen processing & presentation	19	474	0.0332142	0.946552	0.946552	0.0238555
mitochondrial fatty acid beta-oxidation of saturated fatty acids	1	53	0.00371383	0.947883	0.947883	0.0232452
DAP12 interactions	1	53	0.00371383	0.947883	0.947883	0.0232452
Developmental Biology	58	1263	0.0885012	0.947937	0.947937	0.0232207
SARS-CoV-2 Infection	3	112	0.00784808	0.948227	0.948227	0.0230876
Interleukin-4 and Interleukin-13 signaling	7	211	0.0147852	0.94832	0.94832	0.0230449
Diseases of signal transduction by growth factor receptors and second messengers	20	498	0.0348959	0.949702	0.949702	0.0224127
Formation of the ternary complex, and subsequently, the 43S complex	1	54	0.0037839	0.950714	0.950714	0.0219502
Inactivation, recovery and regulation of the phototransduction cascade	1	54	0.0037839	0.950714	0.950714	0.0219502
Cell recruitment (pro-inflammatory response)	1	54	0.0037839	0.950714	0.950714	0.0219502
Purinergic signaling in leishmaniasis infection	1	54	0.0037839	0.950714	0.950714	0.0219502
G alpha (12/13) signalling events	2	86	0.00602621	0.952119	0.952119	0.0213086
Cytokine Signaling in Immune system	49	1092	0.0765188	0.952722	0.952722	0.0210336
EPH-ephrin mediated repulsion of cells	1	55	0.00385397	0.953391	0.953391	0.0207289
Retrograde transport at the Trans-Golgi-Network	1	55	0.00385397	0.953391	0.953391	0.0207289
NGF-stimulated transcription	1	56	0.00392404	0.955923	0.955923	0.0195771
Pyruvate metabolism	1	57	0.00399411	0.958318	0.958318	0.0184905
Cargo trafficking to the periciliary membrane	1	57	0.00399411	0.958318	0.958318	0.0184905
Asparagine N-linked glycosylation	16	421	0.0295004	0.958466	0.958466	0.0184235
MyD88:MAL(TIRAP) cascade initiated on plasma membrane	3	118	0.00826852	0.959561	0.959561	0.0179273
Toll Like Receptor TLR6:TLR2 Cascade	3	118	0.00826852	0.959561	0.959561	0.0179273
Antigen processing-Cross presentation	6	195	0.0136641	0.95993	0.95993	0.0177603
Inositol phosphate metabolism	2	90	0.0063065	0.960242	0.960242	0.0176192
Metabolism of amine-derived hormones	1	58	0.00406419	0.960582	0.960582	0.0174654
Synthesis of Prostaglandins (PG) and Thromboxanes (TX)	1	58	0.00406419	0.960582	0.960582	0.0174654
SRP-dependent cotranslational protein targeting to membrane	3	119	0.00833859	0.961207	0.961207	0.0171829
rRNA processing	8	245	0.0171677	0.962527	0.962527	0.0165872
The phototransduction cascade	1	59	0.00413426	0.962724	0.962724	0.0164982
GTP hydrolysis and joining of the 60S ribosomal subunit	3	120	0.00840866	0.96279	0.96279	0.0164682
L13a-mediated translational silencing of Ceruloplasmin expression	3	120	0.00840866	0.96279	0.96279	0.0164682
TCR signaling	4	147	0.0103006	0.96314	0.96314	0.0163106
Toll Like Receptor TLR1:TLR2 Cascade	3	121	0.00847873	0.964313	0.964313	0.0157821
Toll Like Receptor 2 (TLR2) Cascade	3	121	0.00847873	0.964313	0.964313	0.0157821
Translation	12	339	0.0237545	0.964601	0.964601	0.0156522
SARS-CoV-1 Infection	2	93	0.00651671	0.965449	0.965449	0.0152705
Nucleotide biosynthesis	1	61	0.0042744	0.966665	0.966665	0.014724
RNA polymerase II transcribes snRNA genes	2	94	0.00658678	0.967035	0.967035	0.014558
PIP3 activates AKT signaling	11	319	0.022353	0.967089	0.967089	0.0145334
Influenza Viral RNA Transcription and Replication	5	176	0.0123327	0.967324	0.967324	0.0144278
XBP1(S) activates chaperone genes	2	95	0.00665686	0.96855	0.96855	0.0138781
Intracellular signaling by second messengers	13	366	0.0256464	0.968568	0.968568	0.0138699
G alpha (z) signalling events	1	63	0.00441455	0.97019	0.97019	0.0131432
NRAGE signals death through JNK	1	64	0.00448462	0.97181	0.97181	0.0124185
Disorders of transmembrane transporters	9	278	0.0194801	0.971834	0.971834	0.012408
IRS-mediated signalling	1	65	0.00455469	0.973343	0.973343	0.0117343
MAPK1/MAPK3 signaling	11	329	0.0230537	0.975146	0.975146	0.0109305
Cap-dependent Translation Initiation	3	130	0.00910938	0.975604	0.975604	0.0107264
Eukaryotic Translation Initiation	3	130	0.00910938	0.975604	0.975604	0.0107264
Regulation of actin dynamics for phagocytic cup formation	4	158	0.0110714	0.975957	0.975957	0.0105693
Cell-cell junction organization	1	67	0.00469484	0.976162	0.976162	0.0104781
Nonsense Mediated Decay (NMD) independent of the Exon Junction Complex (EJC)	2	101	0.00707729	0.976325	0.976325	0.0104058
IRE1alpha activates chaperones	2	101	0.00707729	0.976325	0.976325	0.0104058
GABA receptor activation	1	68	0.00476491	0.977458	0.977458	0.00990185
RAB geranylgeranylation	1	68	0.00476491	0.977458	0.977458	0.00990185
NCAM signaling for neurite out-growth	1	70	0.00490505	0.979843	0.979843	0.00884359
Signaling by PDGF	1	70	0.00490505	0.979843	0.979843	0.00884359
Regulation of insulin secretion	2	106	0.00742765	0.981352	0.981352	0.00817515
Disease	114	2431	0.170345	0.981694	0.981694	0.00802367
Insulin receptor signalling cascade	1	72	0.0050452	0.981976	0.981976	0.00789933
Glyoxylate metabolism and glycine degradation	1	72	0.0050452	0.981976	0.981976	0.00789933
Platelet activation, signaling and aggregation	9	293	0.0205311	0.982239	0.982239	0.00778268
Metabolism of carbohydrates	16	456	0.0319529	0.982506	0.982506	0.00766458
Signaling by Retinoic Acid	1	73	0.00511527	0.982956	0.982956	0.007466
Transport of vitamins, nucleosides, and related molecules	2	108	0.00756779	0.983059	0.983059	0.0074206
RAF/MAP kinase cascade	10	322	0.0225632	0.984763	0.984763	0.0066682
Nucleotide catabolism	3	144	0.0100904	0.986693	0.986693	0.0058179
Integration of energy metabolism	3	145	0.0101605	0.987265	0.987265	0.00556638
FCERI mediated NF-kB activation	4	175	0.0122626	0.987849	0.987849	0.00530958
Cargo recognition for clathrin-mediated endocytosis	2	115	0.0080583	0.987917	0.987917	0.00527952
Nuclear Events (kinase and transcription factor activation)	1	80	0.00560577	0.988478	0.988478	0.00503294
MAPK family signaling cascades	12	380	0.0266274	0.988838	0.988838	0.00487501
Ion channel transport	5	206	0.0144349	0.989369	0.989369	0.00464189
Fc epsilon receptor (FCERI) signaling	6	235	0.016467	0.990217	0.990217	0.00426959
Toll Like Receptor 4 (TLR4) Cascade	3	151	0.0105809	0.99023	0.99023	0.0042641
tRNA processing	4	182	0.0127531	0.990889	0.990889	0.00397508
SLC transporter disorders	4	183	0.0128232	0.991259	0.991259	0.00381301
Glycosphingolipid metabolism	1	86	0.00602621	0.991764	0.991764	0.0035915
Integrin cell surface interactions	1	86	0.00602621	0.991764	0.991764	0.0035915
Interferon Signaling	12	394	0.0276084	0.99267	0.99267	0.0031951
Toll-like Receptor Cascades	4	188	0.0131736	0.992902	0.992902	0.00309347
Biosynthesis of DHA-derived SPMs	1	89	0.00623642	0.993038	0.993038	0.00303432
Clathrin-mediated endocytosis	3	161	0.0112816	0.993754	0.993754	0.0027213
Fcgamma receptor (FCGR) dependent phagocytosis	4	193	0.0135239	0.994247	0.994247	0.00250563
Protein-protein interactions at synapses	1	93	0.00651671	0.994435	0.994435	0.00242373
Sulfur amino acid metabolism	1	93	0.00651671	0.994435	0.994435	0.00242373
RAB GEFs exchange GTP for GDP on RABs	1	94	0.00658678	0.994738	0.994738	0.00229138
Cell junction organization	1	94	0.00658678	0.994738	0.994738	0.00229138
Transport of inorganic cations/anions and amino acids/oligopeptides	3	165	0.0115619	0.994787	0.994787	0.00227005
Cell-Cell communication	2	133	0.0093196	0.994998	0.994998	0.00217761
Peptide chain elongation	1	97	0.006797	0.995552	0.995552	0.00193616
Signaling by Insulin receptor	1	97	0.006797	0.995552	0.995552	0.00193616
Plasma lipoprotein assembly, remodeling, and clearance	1	98	0.00686707	0.995794	0.995794	0.00183046
Cardiac conduction	2	138	0.00966996	0.996097	0.996097	0.00169851
Eukaryotic Translation Elongation	1	102	0.00714736	0.996639	0.996639	0.00146232
PPARA activates gene expression	3	175	0.0122626	0.996696	0.996696	0.00143709
Antigen activates B Cell Receptor (BCR) leading to generation of second messengers	1	103	0.00721743	0.996822	0.996822	0.0013825
Signaling by NTRK1 (TRKA)	2	143	0.0100203	0.996957	0.996957	0.00132349
Regulation of lipid metabolism by PPARalpha	3	177	0.0124028	0.996987	0.996987	0.00131067
Formation of a pool of free 40S subunits	1	106	0.00742765	0.997314	0.997314	0.00116824
Eukaryotic Translation Termination	1	106	0.00742765	0.997314	0.997314	0.00116824
Muscle contraction	4	213	0.0149254	0.997558	0.997558	0.00106203
Degradation of the extracellular matrix	2	148	0.0103707	0.997631	0.997631	0.00103027
Metabolism of steroids	8	328	0.0229837	0.997734	0.997734	0.000985153
Selenocysteine synthesis	1	112	0.00784808	0.998081	0.998081	0.000834205
Neuronal System	14	489	0.0342653	0.998258	0.998258	0.000757154
Viral mRNA Translation	1	114	0.00798823	0.998285	0.998285	0.000745619
Response of EIF2AK4 (GCN2) to amino acid deficiency	1	115	0.0080583	0.998378	0.998378	0.000704917
Parasite infection	2	157	0.0110013	0.998493	0.998493	0.00065487
Leishmania phagocytosis	2	157	0.0110013	0.998493	0.998493	0.00065487
FCGR3A-mediated phagocytosis	2	157	0.0110013	0.998493	0.998493	0.00065487
Platelet homeostasis	1	118	0.00826852	0.998629	0.998629	0.000595659
ADORA2B mediated anti-inflammatory cytokines production	2	159	0.0111415	0.998638	0.998638	0.000591907
Signaling by Receptor Tyrosine Kinases	19	618	0.0433046	0.99864	0.99864	0.000591175
Antimicrobial peptides	1	123	0.00861888	0.998965	0.998965	0.000449864
FCERI mediated MAPK activation	1	124	0.00868895	0.999021	0.999021	0.0004253
PI3K/AKT Signaling in Cancer	1	124	0.00868895	0.999021	0.999021	0.0004253
Signaling by NTRKs	2	166	0.011632	0.999045	0.999045	0.000415084
Binding and Uptake of Ligands by Scavenger Receptors	2	168	0.0117721	0.999137	0.999137	0.000374951
Arachidonic acid metabolism	2	168	0.0117721	0.999137	0.999137	0.000374951
FCERI mediated Ca+2 mobilization	1	129	0.00903931	0.999261	0.999261	0.000321179
G alpha (s) signalling events	2	172	0.0120524	0.999296	0.999296	0.000305835
Rab regulation of trafficking	1	131	0.00917945	0.999339	0.999339	0.000287052
Synthesis of substrates in N-glycan biosythesis	1	131	0.00917945	0.999339	0.999339	0.000287052
Selenoamino acid metabolism	2	180	0.012613	0.999532	0.999532	0.000203178
Formation of the cornified envelope	1	138	0.00966996	0.999554	0.999554	0.000193715
FCGR3A-mediated IL10 synthesis	1	141	0.00988018	0.999623	0.999623	0.000163661
Cell surface interactions at the vascular wall	4	257	0.0180085	0.999657	0.999657	0.000149106
Sphingolipid metabolism	1	158	0.0110714	0.999855	0.999855	6.29179e-05
Biosynthesis of specialized proresolving mediators (SPMs)	1	159	0.0111415	0.999863	0.999863	5.94755e-05
Biosynthesis of the N-glycan precursor (dolichol lipid-linked oligosaccharide, LLO) and transfer to a nascent protein	1	159	0.0111415	0.999863	0.999863	5.94755e-05
Transport of bile salts and organic acids, metal ions and amine compounds	1	163	0.0114218	0.999891	0.999891	4.74873e-05
Visual phototransduction	1	169	0.0118422	0.999922	0.999922	3.38756e-05
Metabolism of water-soluble vitamins and cofactors	3	256	0.0179385	0.999931	0.999931	2.99964e-05
Anti-inflammatory response favouring Leishmania parasite infection	4	297	0.0208114	0.999946	0.999946	2.32834e-05
Leishmania parasite growth and survival	4	297	0.0208114	0.999946	0.999946	2.32834e-05
Cellular response to starvation	1	176	0.0123327	0.999947	0.999947	2.28387e-05
Glycosaminoglycan metabolism	1	182	0.0127531	0.999962	0.999962	1.62873e-05
Metabolism of vitamins and cofactors	6	379	0.0265574	0.999974	0.999974	1.14227e-05
Interferon gamma signaling	2	250	0.017518	0.999988	0.999988	5.29821e-06
Peptide ligand-binding receptors	1	203	0.0142247	0.999989	0.999989	4.9829e-06
Immune System	105	2684	0.188074	0.999989	0.999989	4.76446e-06
Leishmania infection	6	406	0.0284493	0.999992	0.999992	3.41014e-06
SLC-mediated transmembrane transport	6	416	0.02915	0.999995	0.999995	2.16652e-06
G alpha (i) signalling events	6	426	0.0298507	0.999997	0.999997	1.3723e-06
Keratinization	1	226	0.0158363	0.999997	0.999997	1.3591e-06
Fatty acid metabolism	5	431	0.0302011	1	1	2.11577e-07
Phase II - Conjugation of compounds	1	263	0.018429	1	1	1.67354e-07
Metabolism of amino acids and derivatives	12	665	0.046598	1	1	1.48156e-07
Innate Immune System	37	1334	0.0934763	1	1	1.0206e-07
Extracellular matrix organization	2	329	0.0230537	1	1	7.7691e-08
G alpha (q) signalling events	1	284	0.0199005	1	1	5.08509e-08
Phase I - Functionalization of compounds	1	299	0.0209516	1	1	2.16918e-08
Diseases of metabolism	3	409	0.0286595	1	1	1.2181e-08
Sensory Perception	5	493	0.0345456	1	1	1.02027e-08
Class A/1 (Rhodopsin-like receptors)	2	412	0.0288697	1	1	8.45505e-10
Transport of small molecules	16	961	0.0673394	1	1	8.52007e-11
GPCR downstream signalling	10	786	0.0550767	1	1	4.01705e-11
Signaling by GPCR	10	865	0.0606124	1	1	9.24163e-13
Biological oxidations	2	549	0.0384696	1	1	4.22568e-13
GPCR ligand binding	2	606	0.0424637	1	1	1.73579e-14
Metabolism of lipids	21	1444	0.101184	1	1	4.33947e-16
Metabolism	94	3646	0.255483	1	1	0

## Sheet: D
GO analysis of genes upregulated in Prolif Cortico versus Cortico (neonatal AP)
Pathway name	#Entities found	#Entities total	Entities ratio	Entities pValue	Entities FDR	-log10(FDR)
Lagging Strand Synthesis	17	26	0.00182188	1.11022e-16	3.44169e-15	14.4632
PCNA-Dependent Long Patch Base Excision Repair	15	23	0.00161166	1.11022e-16	3.44169e-15	14.4632
Activation of the pre-replicative complex	20	36	0.0025226	1.11022e-16	3.44169e-15	14.4632
Activation of ATR in response to replication stress	19	39	0.00273281	1.11022e-16	3.44169e-15	14.4632
G1/S-Specific Transcription	18	43	0.0030131	1.11022e-16	3.44169e-15	14.4632
G1/S Transition	39	150	0.0105108	1.11022e-16	3.44169e-15	14.4632
DNA strand elongation	27	38	0.00266274	1.11022e-16	3.44169e-15	14.4632
Mitotic G1 phase and G1/S transition	43	173	0.0121225	1.11022e-16	3.44169e-15	14.4632
DNA Replication	41	174	0.0121926	1.11022e-16	3.44169e-15	14.4632
Homology Directed Repair	32	130	0.00910938	1.11022e-16	3.44169e-15	14.4632
Synthesis of DNA	34	133	0.0093196	1.11022e-16	3.44169e-15	14.4632
HDR through Homologous Recombination (HRR) or Single Strand Annealing (SSA)	31	124	0.00868895	1.11022e-16	3.44169e-15	14.4632
DNA Double-Strand Break Repair	34	168	0.0117721	1.11022e-16	3.44169e-15	14.4632
S Phase	41	180	0.012613	1.11022e-16	3.44169e-15	14.4632
HDR through Homologous Recombination (HRR)	23	72	0.0050452	1.11022e-16	3.44169e-15	14.4632
Chromosome Maintenance	32	138	0.00966996	1.11022e-16	3.44169e-15	14.4632
Cell Cycle	119	734	0.051433	1.11022e-16	3.44169e-15	14.4632
Cell Cycle, Mitotic	98	596	0.041763	1.11022e-16	3.44169e-15	14.4632
G2/M Checkpoints	30	154	0.0107911	1.11022e-16	3.44169e-15	14.4632
Cell Cycle Checkpoints	50	280	0.0196202	1.11022e-16	3.44169e-15	14.4632
DNA Repair	46	380	0.0266274	1.11022e-16	3.44169e-15	14.4632
Mitotic Prometaphase	32	211	0.0147852	2.22045e-16	6.66134e-15	14.1764
DNA Replication Pre-Initiation	25	120	0.00840866	4.44089e-16	1.28786e-14	13.8901
Processing of DNA double-strand break ends	22	90	0.0063065	9.99201e-16	2.69784e-14	13.569
Telomere C-strand (Lagging Strand) Synthesis	18	51	0.00357368	9.99201e-16	2.69784e-14	13.569
Homologous DNA Pairing and Strand Exchange	17	44	0.00308318	1.44329e-15	3.75255e-14	13.4257
Recognition of DNA damage by PCNA-containing replication complex	15	30	0.00210217	1.66533e-15	4.16334e-14	13.3806
Resolution of AP sites via the multiple-nucleotide patch replacement pathway	15	32	0.00224231	4.21885e-15	1.01252e-13	12.9946
M Phase	42	416	0.02915	4.77396e-15	1.09801e-13	12.9594
Presynaptic phase of homologous DNA pairing and strand exchange	16	41	0.00287296	8.32667e-15	1.89848e-13	12.7216
Gap-filling DNA repair synthesis and ligation in GG-NER	14	27	0.00189195	9.10383e-15	1.89848e-13	12.7216
Polymerase switching	12	16	0.00112115	1.03251e-14	1.89848e-13	12.7216
Leading Strand Synthesis	12	16	0.00112115	1.03251e-14	1.89848e-13	12.7216
Transcriptional Regulation by TP53	45	487	0.0341251	1.05471e-14	1.89848e-13	12.7216
Extension of Telomeres	19	69	0.00483498	1.21014e-14	2.17826e-13	12.6619
Telomere Maintenance	22	111	0.00777801	6.80567e-14	1.15696e-12	11.9367
Processive synthesis on the lagging strand	12	19	0.00133137	7.64944e-14	1.3004e-12	11.8859
Resolution of Abasic Sites (AP sites)	16	48	0.00336346	8.9484e-14	1.43174e-12	11.8441
G2/M DNA damage checkpoint	19	81	0.00567585	1.98175e-13	3.1708e-12	11.4988
Termination of translesion DNA synthesis	14	35	0.00245253	2.89213e-13	4.62741e-12	11.3347
Resolution of Sister Chromatid Cohesion	23	134	0.00938967	3.39617e-13	5.09426e-12	11.2929
Unwinding of DNA	10	12	0.000840866	6.26277e-13	9.39415e-12	11.0271
Transcriptional Regulation by E2F6	15	46	0.00322332	7.29194e-13	1.02087e-11	10.991
Polymerase switching on the C-strand of the telomere	13	31	0.00217224	1.14631e-12	1.55067e-11	10.8095
DNA Damage Bypass	16	57	0.00399411	1.15663e-12	1.55067e-11	10.8095
Removal of the Flap Intermediate	11	18	0.0012613	1.19282e-12	1.55067e-11	10.8095
HDR through Single Strand Annealing (SSA)	14	39	0.00273281	1.20925e-12	1.57203e-11	10.8035
Regulation of TP53 Activity through Phosphorylation	19	95	0.00665686	3.04556e-12	3.95923e-11	10.4024
Base Excision Repair	19	100	0.00700722	7.25975e-12	9.43767e-11	10.0251
Translesion synthesis by Y family DNA polymerases bypasses lesions on DNA template	14	48	0.00336346	1.83037e-11	2.19644e-10	9.65828
EML4 and NUDC in mitotic spindle formation	20	121	0.00847873	2.34797e-11	2.81756e-10	9.55013
Dual Incision in GG-NER	13	41	0.00287296	3.51872e-11	4.22246e-10	9.37443
Mitotic Anaphase	27	249	0.017448	9.90392e-11	1.18847e-09	8.92501
Mitotic Metaphase and Anaphase	27	250	0.017518	1.08051e-10	1.29661e-09	8.88719
G0 and Early G1	12	38	0.00266274	2.10201e-10	2.31222e-09	8.63597
Mismatch repair (MMR) directed by MSH2:MSH3 (MutSbeta)	10	22	0.00154159	2.18222e-10	2.40044e-09	8.61971
Mismatch repair (MMR) directed by MSH2:MSH6 (MutSalpha)	10	22	0.00154159	2.18222e-10	2.40044e-09	8.61971
Mismatch Repair	10	23	0.00161166	3.3337e-10	3.66707e-09	8.43568
Regulation of TP53 Activity	22	178	0.0124728	5.35449e-10	5.88994e-09	8.22989
TP53 Regulates Transcription of DNA Repair Genes	16	89	0.00623642	7.33761e-10	8.07137e-09	8.09305
RHO GTPases Activate Formins	20	149	0.0104408	8.33791e-10	8.33791e-09	8.07894
Nucleosome assembly	13	54	0.0037839	9.60666e-10	9.60666e-09	8.01743
Deposition of new CENPA-containing nucleosomes at the centromere	13	54	0.0037839	9.60666e-10	9.60666e-09	8.01743
Gap-filling DNA repair synthesis and ligation in TC-NER	14	66	0.00462476	1.08138e-09	1.08138e-08	7.96602
Meiosis	16	92	0.00644664	1.17052e-09	1.17052e-08	7.93162
Translesion synthesis by REV1	9	19	0.00133137	1.23131e-09	1.23131e-08	7.90963
Amplification of signal from the kinetochores	16	94	0.00658678	1.58291e-09	1.42462e-08	7.8463
Amplification of signal from unattached kinetochores via a MAD2 inhibitory signal	16	94	0.00658678	1.58291e-09	1.42462e-08	7.8463
Translesion synthesis by POLI	9	20	0.00140144	1.9138e-09	1.72242e-08	7.76386
Meiotic recombination	13	58	0.00406419	2.23615e-09	2.01253e-08	7.69626
Separation of Sister Chromatids	22	195	0.0136641	2.77845e-09	2.5006e-08	7.60196
Translesion synthesis by POLK	9	21	0.00147152	2.90834e-09	2.61751e-08	7.58211
Assembly of the pre-replicative complex	16	102	0.00714736	4.93836e-09	4.44453e-08	7.35217
Translesion Synthesis by POLH	9	24	0.00168173	9.09317e-09	8.18386e-08	7.08704
SUMOylation	21	192	0.0134539	1.08646e-08	8.69166e-08	7.0609
Transcription of E2F targets under negative control by DREAM complex	9	25	0.0017518	1.28625e-08	1.029e-07	6.98759
Dual incision in TC-NER	13	68	0.00476491	1.43318e-08	1.14654e-07	6.94061
Mitotic Spindle Checkpoint	16	111	0.00777801	1.57964e-08	1.26371e-07	6.89835
SUMO E3 ligases SUMOylate target proteins	20	183	0.0128232	2.47445e-08	1.97956e-07	6.70343
Transcription-Coupled Nucleotide Excision Repair (TC-NER)	14	85	0.00595613	2.50282e-08	2.00225e-07	6.69848
Reproduction	16	123	0.00861888	6.33557e-08	5.06845e-07	6.29512
Global Genome Nucleotide Excision Repair (GG-NER)	14	92	0.00644664	6.5404e-08	5.23232e-07	6.28131
Removal of the Flap Intermediate from the C-strand	8	22	0.00154159	7.71878e-08	6.17502e-07	6.20936
Processive synthesis on the C-strand of the telomere	9	33	0.00231238	1.32723e-07	1.04049e-06	5.98276
Diseases of DNA Double-Strand Break Repair	8	24	0.00168173	1.48642e-07	1.04049e-06	5.98276
Defective HDR through Homologous Recombination (HRR) due to PALB2 loss of function	8	24	0.00168173	1.48642e-07	1.04049e-06	5.98276
Defective HDR through Homologous Recombination Repair (HRR) due to PALB2 loss of BRCA1 binding function	8	24	0.00168173	1.48642e-07	1.04049e-06	5.98276
Defective HDR through Homologous Recombination Repair (HRR) due to PALB2 loss of BRCA2/RAD51/RAD51C binding function	8	24	0.00168173	1.48642e-07	1.04049e-06	5.98276
Defective HDR through Homologous Recombination (HRR) due to BRCA1 loss-of-function	8	24	0.00168173	1.48642e-07	1.04049e-06	5.98276
E2F mediated regulation of DNA replication	8	24	0.00168173	1.48642e-07	1.04049e-06	5.98276
Defective binding of RB1 mutants to E2F1,(E2F2, E2F3)	7	17	0.00119123	2.22155e-07	1.55509e-06	5.80825
Aberrant regulation of mitotic G1/S transition in cancer due to RB1 defects	7	17	0.00119123	2.22155e-07	1.55509e-06	5.80825
Diseases of DNA repair	9	37	0.00259267	3.42296e-07	2.39607e-06	5.6205
Gene expression (Transcription)	77	1855	0.129984	5.14472e-07	3.6013e-06	5.44354
Defective pyroptosis	10	52	0.00364375	6.37557e-07	4.4629e-06	5.35038
mRNA Splicing - Major Pathway	18	185	0.0129634	6.57663e-07	4.60364e-06	5.3369
Regulation of HSF1-mediated heat shock response	14	113	0.00791816	7.47926e-07	5.23548e-06	5.28104
Resolution of D-loop Structures through Synthesis-Dependent Strand Annealing (SDSA)	8	30	0.00210217	7.84008e-07	5.48805e-06	5.26058
Cellular response to heat stress	15	135	0.00945974	1.15061e-06	7.02098e-06	5.1536
HSF1 activation	9	43	0.0030131	1.17016e-06	7.02098e-06	5.1536
Nucleotide Excision Repair	14	119	0.00833859	1.36037e-06	8.16225e-06	5.08819
mRNA Splicing	18	196	0.0137341	1.47397e-06	8.84382e-06	5.05336
Orc1 removal from chromatin	11	73	0.00511527	1.84966e-06	1.1098e-05	4.95476
Cellular Senescence	18	200	0.0140144	1.94844e-06	1.16906e-05	4.93216
Diseases of programmed cell death	12	90	0.0063065	2.20612e-06	1.32367e-05	4.87822
Resolution of D-loop Structures through Holliday Junction Intermediates	8	36	0.0025226	2.9836e-06	1.79016e-05	4.74711
Switching of origins to a post-replicative state	12	93	0.00651671	3.0713e-06	1.84278e-05	4.73453
Resolution of D-Loop Structures	8	37	0.00259267	3.64001e-06	2.18401e-05	4.66075
Processing of Capped Intron-Containing Pre-mRNA	20	256	0.0179385	4.34221e-06	2.60533e-05	4.58414
RHO GTPase Effectors	23	326	0.0228435	4.41503e-06	2.64902e-05	4.57692
SUMOylation of DNA damage response and repair proteins	11	81	0.00567585	4.91684e-06	2.9501e-05	4.53016
CDC6 association with the ORC:origin complex	5	11	0.000770794	7.73315e-06	4.63989e-05	4.33349
TP53 Regulates Transcription of Genes Involved in G1 Cell Cycle Arrest	6	20	0.00140144	9.91774e-06	5.95065e-05	4.22544
RNA Polymerase II Transcription	67	1694	0.118702	1.68438e-05	0.000101063	3.99541
Attenuation phase	8	47	0.00329339	2.01407e-05	0.000114089	3.94275
Oxidative Stress Induced Senescence	12	114	0.00798823	2.28179e-05	0.000114089	3.94275
Recruitment of NuMA to mitotic centrosomes	11	97	0.006797	2.56259e-05	0.00012813	3.89235
Mitotic Prophase	13	135	0.00945974	2.62028e-05	0.000131014	3.88268
Aberrant regulation of mitotic cell cycle due to RB1 defects	7	36	0.0025226	2.89665e-05	0.000144833	3.83913
TP53 Regulates Transcription of Cell Cycle Genes	9	65	0.00455469	3.07175e-05	0.000153587	3.81364
Inhibition of replication initiation of damaged DNA by RB1/E2F1	5	15	0.00105108	3.37593e-05	0.000168797	3.77264
Cyclin D associated events in G1	8	51	0.00357368	3.5697e-05	0.000178485	3.7484
G1 Phase	8	51	0.00357368	3.5697e-05	0.000178485	3.7484
Diseases of mitotic cell cycle	7	38	0.00266274	4.06325e-05	0.000203163	3.69216
Generic Transcription Pathway	61	1555	0.108962	5.52334e-05	0.000276167	3.55883
Nuclear Envelope (NE) Reassembly	10	88	0.00616635	5.84284e-05	0.000292142	3.53441
Condensation of Prophase Chromosomes	8	55	0.00385397	6.02264e-05	0.000301132	3.52124
Mitotic G2-G2/M phases	16	214	0.0149954	6.55924e-05	0.000327962	3.48418
mRNA Splicing - Minor Pathway	8	56	0.00392404	6.81709e-05	0.000340854	3.46743
AURKA Activation by TPX2	9	74	0.00518534	8.21043e-05	0.000410522	3.38666
HSF1-dependent transactivation	8	59	0.00413426	9.73984e-05	0.000486992	3.31248
PRC2 methylates histones and DNA	7	44	0.00308318	0.000100566	0.000502829	3.29858
Transcription of E2F targets under negative control by p107 (RBL1) and p130 (RBL2) in complex with HDAC1	5	20	0.00140144	0.000129232	0.000646159	3.18966
Epigenetic regulation of gene expression	12	139	0.00974003	0.000146507	0.000732534	3.13517
Recruitment of mitotic centrosome proteins and complexes	9	81	0.00567585	0.000160552	0.000802762	3.09541
Centrosome maturation	9	83	0.00581599	0.000191977	0.000959884	3.01778
Fanconi Anemia Pathway	7	53	0.00371383	0.000309201	0.00134472	2.87137
Cellular responses to stress	40	952	0.0667087	0.000326679	0.00134472	2.87137
Loss of proteins required for interphase microtubule organization from the centrosome	8	71	0.00497512	0.000336181	0.00134472	2.87137
Loss of Nlp from mitotic centrosomes	8	71	0.00497512	0.000336181	0.00134472	2.87137
DNA Damage/Telomere Stress Induced Senescence	8	71	0.00497512	0.000336181	0.00134472	2.87137
Transcriptional regulation of granulopoiesis	8	71	0.00497512	0.000336181	0.00134472	2.87137
HIV Life Cycle	13	179	0.0125429	0.000409951	0.0016398	2.78521
Transcriptional activation of cell cycle inhibitor p21	3	6	0.000420433	0.000423027	0.00169211	2.77157
Transcriptional activation of p53 responsive genes	3	6	0.000420433	0.000423027	0.00169211	2.77157
Early Phase of HIV Life Cycle	5	26	0.00182188	0.000427735	0.00171094	2.76677
Cellular responses to stimuli	40	970	0.06797	0.000471756	0.00188702	2.72422
Nonhomologous End-Joining (NHEJ)	7	57	0.00399411	0.000475177	0.00190071	2.72108
Condensation of Prometaphase Chromosomes	4	15	0.00105108	0.00048771	0.00195084	2.70978
DNA replication initiation	4	16	0.00112115	0.000619817	0.00247927	2.60568
G2/M Transition	14	212	0.0148553	0.000629699	0.0025188	2.59881
G2 Phase	3	7	0.000490505	0.000660148	0.00264059	2.5783
Positive epigenetic regulation of rRNA expression	8	80	0.00560577	0.000728665	0.00291466	2.53541
Interconversion of nucleotide di- and triphosphates	8	80	0.00560577	0.000728665	0.00291466	2.53541
Meiotic synapsis	7	62	0.00434447	0.000775026	0.0031001	2.50862
B-WICH complex positively regulates rRNA expression	7	62	0.00434447	0.000775026	0.0031001	2.50862
Recruitment and ATM-mediated phosphorylation of repair and signaling proteins at DNA double strand breaks	7	67	0.00469484	0.00120786	0.00483144	2.31592
SUMOylation of DNA replication proteins	6	50	0.00350361	0.00134439	0.00537756	2.26941
E2F-enabled inhibition of pre-replication complex formation	3	9	0.00063065	0.00135509	0.00542034	2.26597
Regulation of PLK1 Activity at G2/M Transition	8	92	0.00644664	0.00175184	0.00700736	2.15445
RMTs methylate histone arginines	6	53	0.00371383	0.00179883	0.00719531	2.14295
DNA methylation	5	36	0.0025226	0.00179892	0.00719569	2.14293
HIV Infection	15	264	0.0184991	0.00180015	0.0072006	2.14263
HSP90 chaperone cycle for steroid hormone receptors (SHR) in the presence of ligand	7	72	0.0050452	0.00181057	0.00724229	2.14012
Microtubule-dependent trafficking of connexons from Golgi to the plasma membrane	4	22	0.00154159	0.00198393	0.00793573	2.10041
DNA Double Strand Break Response	7	75	0.00525541	0.00227066	0.00908264	2.04179
Transport of connexons to the plasma membrane	4	23	0.00161166	0.0023269	0.00930762	2.03116
SLBP Dependent Processing of Replication-Dependent Histone Pre-mRNAs	3	11	0.000770794	0.00238971	0.00955882	2.0196
Anchoring of the basal body to the plasma membrane	8	99	0.00693715	0.00273791	0.0109517	1.96052
Assembly of the ORC complex at the origin of replication	5	40	0.00280289	0.00282366	0.0112946	1.94713
The role of GTSE1 in G2/M progression after G2 checkpoint	7	83	0.00581599	0.0039419	0.0157676	1.80223
Initiation of Nuclear Envelope (NE) Reformation	4	27	0.00189195	0.00410688	0.0164275	1.78443
Vpr-mediated induction of apoptosis by mitochondrial outer membrane permeabilization	2	4	0.000280289	0.00417896	0.0167158	1.77687
Cyclin E associated events during G1/S transition	7	88	0.00616635	0.00538013	0.0171618	1.76544
Interactions of Vpr with host cellular proteins	5	47	0.00329339	0.00553946	0.0171618	1.76544
Aggrephagy	5	47	0.00329339	0.00553946	0.0171618	1.76544
RNA Polymerase II Transcription Termination	6	67	0.00469484	0.00559573	0.0171618	1.76544
APOBEC3G mediated resistance to HIV-1 infection	3	15	0.00105108	0.0056546	0.0171618	1.76544
Integration of provirus	3	15	0.00105108	0.0056546	0.0171618	1.76544
HCMV Early Events	12	215	0.0150655	0.00572061	0.0171618	1.76544
Signaling by Rho GTPases	28	709	0.0496812	0.00598924	0.0179677	1.74551
Cyclin A:Cdk2-associated events at S phase entry	7	90	0.0063065	0.00605392	0.0181618	1.74084
Metabolism of RNA	30	783	0.0548665	0.00681149	0.0204345	1.68964
G1/S DNA Damage Checkpoints	6	72	0.0050452	0.00782492	0.0234748	1.6294
Signaling by Rho GTPases, Miro GTPases and RHOBTB3	28	725	0.0508023	0.00797227	0.0239168	1.6213
Gene and protein expression by JAK-STAT signaling after Interleukin-12 stimulation	6	73	0.00511527	0.00833777	0.0250133	1.60183
Gap junction trafficking	5	52	0.00364375	0.00835705	0.0250712	1.60083
Transcriptional regulation by the AP-2 (TFAP2) family of transcription factors	5	52	0.00364375	0.00835705	0.0250712	1.60083
Chromatin organization	13	256	0.0179385	0.00872646	0.0261794	1.58204
Chromatin modifying enzymes	13	256	0.0179385	0.00872646	0.0261794	1.58204
Metabolism of nucleotides	13	256	0.0179385	0.00872646	0.0261794	1.58204
Activation of AMPK downstream of NMDARs	4	34	0.00238245	0.0090899	0.0272697	1.56432
Phosphorylation of proteins involved in G1/S transition by active Cyclin E:Cdk2 complexes	2	6	0.000420433	0.00911567	0.027347	1.56309
TFAP2 (AP-2) family regulates transcription of cell cycle factors	2	6	0.000420433	0.00911567	0.027347	1.56309
Activation of NOXA and translocation to mitochondria	2	6	0.000420433	0.00911567	0.027347	1.56309
Host Interactions of HIV factors	9	151	0.0105809	0.0106025	0.0318076	1.49747
RHO GTPases activate IQGAPs	4	36	0.0025226	0.0110175	0.0330524	1.4808
Gap junction trafficking and regulation	5	56	0.00392404	0.0112284	0.0336852	1.47256
NoRC negatively regulates rRNA expression	6	80	0.00560577	0.0126232	0.0378695	1.42171
CDT1 association with the CDC6:ORC:origin complex	5	59	0.00413426	0.0137784	0.0413353	1.38368
TP53 Regulates Transcription of Genes Involved in G2 Cell Cycle Arrest	3	21	0.00147152	0.0139959	0.0419877	1.37688
Sealing of the nuclear envelope (NE) by ESCRT-III	4	39	0.00273281	0.0143722	0.0431167	1.36535
Interleukin-12 signaling	6	84	0.00588606	0.0156668	0.0470004	1.3279
RUNX3 regulates CDKN1A transcription	2	8	0.000560577	0.0157129	0.0471387	1.32662
Telomere C-strand synthesis initiation	3	22	0.00154159	0.015819	0.047457	1.3237
SCF(Skp2)-mediated degradation of p27/p21	5	62	0.00434447	0.016692	0.050076	1.30037
Gap junction assembly	4	41	0.00287296	0.0169316	0.0507948	1.29418
Late Phase of HIV Life Cycle	9	164	0.0114918	0.0171932	0.0515797	1.28752
Depolymerisation of the Nuclear Lamina	3	23	0.00161166	0.0177694	0.0533081	1.27321
RNA Polymerase I Promoter Clearance	6	87	0.00609628	0.0182589	0.0547766	1.2614
Oncogene Induced Senescence	4	42	0.00294303	0.0183113	0.0549339	1.26016
Recognition and association of DNA glycosylase with site containing an affected pyrimidine	4	42	0.00294303	0.0183113	0.0549339	1.26016
RNA Polymerase I Promoter Escape	5	64	0.00448462	0.0188459	0.0565378	1.24766
Autointegration results in viral DNA circles	2	9	0.00063065	0.0195829	0.0587486	1.231
Integration of viral DNA into host genomic DNA	2	9	0.00063065	0.0195829	0.0587486	1.231
Nuclear Envelope Breakdown	5	65	0.00455469	0.0199884	0.0599651	1.2221
RNA Polymerase I Transcription	6	89	0.00623642	0.0201414	0.0604243	1.21879
Negative epigenetic regulation of rRNA expression	6	89	0.00623642	0.0201414	0.0604243	1.21879
Selective autophagy	6	89	0.00623642	0.0201414	0.0604243	1.21879
Pre-NOTCH Transcription and Translation	6	89	0.00623642	0.0201414	0.0604243	1.21879
snRNP Assembly	5	66	0.00462476	0.0211752	0.0635256	1.19705
Metabolism of non-coding RNA	5	66	0.00462476	0.0211752	0.0635256	1.19705
Post-chaperonin tubulin folding pathway	3	25	0.0017518	0.0220542	0.0661625	1.17939
Senescence-Associated Secretory Phenotype (SASP)	6	91	0.00637657	0.0221518	0.0664553	1.17747
Rev-mediated nuclear export of HIV RNA	4	45	0.00315325	0.0228608	0.0677305	1.16922
Kinesins	5	68	0.00476491	0.0236845	0.0677305	1.16922
Cohesin Loading onto Chromatin	2	10	0.000700722	0.0238078	0.0677305	1.16922
SLBP independent Processing of Histone Pre-mRNAs	2	10	0.000700722	0.0238078	0.0677305	1.16922
Activation of PUMA and translocation to mitochondria	2	10	0.000700722	0.0238078	0.0677305	1.16922
Gene Silencing by RNA	7	120	0.00840866	0.0252464	0.0677305	1.16922
Interactions of Rev with host cellular proteins	4	47	0.00329339	0.0262431	0.0677305	1.16922
p53-Dependent G1 DNA Damage Response	5	70	0.00490505	0.0263782	0.0677305	1.16922
p53-Dependent G1/S DNA damage checkpoint	5	70	0.00490505	0.0263782	0.0677305	1.16922
FOXO-mediated transcription of cell cycle genes	3	27	0.00189195	0.0268524	0.0677305	1.16922
Interleukin-12 family signaling	6	96	0.00672693	0.0277583	0.0677305	1.16922
ERCC6 (CSB) and EHMT2 (G9a) positively regulate rRNA expression	4	48	0.00336346	0.0280408	0.0677305	1.16922
HCMV Infection	12	270	0.0189195	0.0286407	0.0677305	1.16922
Cilium Assembly	10	210	0.0147152	0.0293216	0.0677305	1.16922
Processing of Capped Intronless Pre-mRNA	3	28	0.00196202	0.0294435	0.0677305	1.16922
PKMTs methylate histone lysines	4	49	0.00343354	0.0299101	0.0677305	1.16922
Assembly and cell surface presentation of NMDA receptors	4	49	0.00343354	0.0299101	0.0677305	1.16922
MASTL Facilitates Mitotic Progression	2	12	0.000840866	0.0332491	0.0677305	1.16922
Cleavage of the damaged pyrimidine	4	51	0.00357368	0.0338653	0.0677305	1.16922
Depyrimidination	4	51	0.00357368	0.0338653	0.0677305	1.16922
Formation of tubulin folding intermediates by CCT/TriC	3	30	0.00210217	0.0350072	0.0700144	1.15481
Establishment of Sister Chromatid Cohesion	2	13	0.000910938	0.0384302	0.0768604	1.1143
2-LTR circle formation	2	13	0.000910938	0.0384302	0.0768604	1.1143
Apoptosis induced DNA fragmentation	2	13	0.000910938	0.0384302	0.0768604	1.1143
Apoptotic execution phase	4	54	0.0037839	0.0403425	0.080685	1.09321
Carboxyterminal post-translational modifications of tubulin	4	55	0.00385397	0.0426473	0.0852946	1.06908
Recycling pathway of L1	4	55	0.00385397	0.0426473	0.0852946	1.06908
Transcriptional regulation by small RNAs	5	81	0.00567585	0.044636	0.0892719	1.04929
Evasion of Oncogene Induced Senescence Due to Defective p16INK4A binding to CDK4	1	2	0.000140144	0.0461339	0.0922678	1.03495
Defective Mismatch Repair Associated With MSH3	1	2	0.000140144	0.0461339	0.0922678	1.03495
Defective DNA double strand break response due to BARD1 loss of function	1	2	0.000140144	0.0461339	0.0922678	1.03495
Defective Mismatch Repair Associated With MSH6	1	2	0.000140144	0.0461339	0.0922678	1.03495
Defective DNA double strand break response due to BRCA1 loss of function	1	2	0.000140144	0.0461339	0.0922678	1.03495
Evasion of Oxidative Stress Induced Senescence Due to Defective p16INK4A binding to CDK4	1	2	0.000140144	0.0461339	0.0922678	1.03495
RHOD GTPase cycle	4	57	0.00399411	0.0474753	0.0949507	1.0225
Packaging Of Telomere Ends	3	34	0.00238245	0.0476323	0.0952646	1.02107
RNA Polymerase I Promoter Opening	3	34	0.00238245	0.0476323	0.0952646	1.02107
HDR through MMEJ (alt-NHEJ)	2	15	0.00105108	0.0496302	0.0992604	1.00322
POLB-Dependent Long Patch Base Excision Repair	2	15	0.00105108	0.0496302	0.0992604	1.00322
Mitotic Telophase/Cytokinesis	2	15	0.00105108	0.0496302	0.0992604	1.00322
Chk1/Chk2(Cds1) mediated inactivation of Cyclin B:Cdk1 complex	2	15	0.00105108	0.0496302	0.0992604	1.00322
Pre-NOTCH Expression and Processing	6	114	0.00798823	0.0553551	0.11071	0.955812
Nucleotide biosynthesis	4	61	0.0042744	0.0580007	0.116001	0.935536
Cooperation of Prefoldin and TriC/CCT in actin and tubulin folding	3	37	0.00259267	0.0583681	0.116736	0.932794
Activation of HOX genes during differentiation	6	116	0.00812837	0.0591734	0.118347	0.926843
Activation of anterior HOX genes in hindbrain development during early embryogenesis	6	116	0.00812837	0.0591734	0.118347	0.926843
Formation of Senescence-Associated Heterochromatin Foci (SAHF)	2	17	0.00119123	0.0618434	0.123687	0.907676
COPI-independent Golgi-to-ER retrograde traffic	4	63	0.00441455	0.0636934	0.127387	0.894875
Base-Excision Repair, AP Site Formation	4	63	0.00441455	0.0636934	0.127387	0.894875
Transport of Mature Transcript to Cytoplasm	5	90	0.0063065	0.0640621	0.128124	0.892369
Recognition and association of DNA glycosylase with site containing an affected purine	3	39	0.00273281	0.0661024	0.132205	0.878753
Potential therapeutics for SARS	5	91	0.00637657	0.0664722	0.132944	0.87633
Macroautophagy	7	150	0.0105108	0.0675554	0.135111	0.86931
Evasion of Oxidative Stress Induced Senescence Due to p16INK4A Defects	1	3	0.000210217	0.0683988	0.136798	0.863922
Evasion of Oncogene Induced Senescence Due to p16INK4A Defects	1	3	0.000210217	0.0683988	0.136798	0.863922
Defective Mismatch Repair Associated With MSH2	1	3	0.000210217	0.0683988	0.136798	0.863922
Evasion of Oxidative Stress Induced Senescence Due to Defective p16INK4A binding to CDK4 and CDK6	1	3	0.000210217	0.0683988	0.136798	0.863922
Evasion of Oncogene Induced Senescence Due to Defective p16INK4A binding to CDK4 and CDK6	1	3	0.000210217	0.0683988	0.136798	0.863922
Breakdown of the nuclear lamina	1	3	0.000210217	0.0683988	0.136798	0.863922
Transport of the SLBP Dependant Mature mRNA	3	40	0.00280289	0.0701366	0.140273	0.853025
Chaperonin-mediated protein folding	5	96	0.00672693	0.0792696	0.158539	0.799863
Regulation of TP53 Degradation	3	43	0.0030131	0.0828809	0.165762	0.780515
Vpr-mediated nuclear import of PICs	3	44	0.00308318	0.0873351	0.17467	0.757781
mRNA decay by 5' to 3' exoribonuclease	2	21	0.00147152	0.0888512	0.177702	0.750307
STAT5 activation downstream of FLT3 ITD mutants	2	21	0.00147152	0.0888512	0.177702	0.750307
Drug resistance in ERBB2 KD mutants	1	4	0.000280289	0.0901455	0.180291	0.744026
Drug-mediated inhibition of ERBB2 signaling	1	4	0.000280289	0.0901455	0.180291	0.744026
Resistance of ERBB2 KD mutants to tesevatinib	1	4	0.000280289	0.0901455	0.180291	0.744026
Drug resistance in ERBB2 TMD/JMD mutants	1	4	0.000280289	0.0901455	0.180291	0.744026
Resistance of ERBB2 KD mutants to osimertinib	1	4	0.000280289	0.0901455	0.180291	0.744026
Resistance of ERBB2 KD mutants to trastuzumab	1	4	0.000280289	0.0901455	0.180291	0.744026
Resistance of ERBB2 KD mutants to afatinib	1	4	0.000280289	0.0901455	0.180291	0.744026
Resistance of ERBB2 KD mutants to sapitinib	1	4	0.000280289	0.0901455	0.180291	0.744026
Resistance of ERBB2 KD mutants to AEE788	1	4	0.000280289	0.0901455	0.180291	0.744026
Resistance of ERBB2 KD mutants to neratinib	1	4	0.000280289	0.0901455	0.180291	0.744026
Resistance of ERBB2 KD mutants to lapatinib	1	4	0.000280289	0.0901455	0.180291	0.744026
Diseases of cellular response to stress	1	4	0.000280289	0.0901455	0.180291	0.744026
Diseases of Cellular Senescence	1	4	0.000280289	0.0901455	0.180291	0.744026
Influenza Virus Induced Apoptosis	1	4	0.000280289	0.0901455	0.180291	0.744026
SIRT1 negatively regulates rRNA expression	3	45	0.00315325	0.0918883	0.183777	0.73571
Cleavage of the damaged purine	3	45	0.00315325	0.0918883	0.183777	0.73571
Protein folding	5	102	0.00714736	0.0962369	0.192474	0.715628
Depurination	3	46	0.00322332	0.0965379	0.193076	0.714272
Regulation of TP53 Expression and Degradation	3	46	0.00322332	0.0965379	0.193076	0.714272
Transport of Mature mRNAs Derived from Intronless Transcripts	3	47	0.00329339	0.101282	0.202563	0.69344
Formation of Incision Complex in GG-NER	3	47	0.00329339	0.101282	0.202563	0.69344
Metabolism of folate and pterines	3	47	0.00329339	0.101282	0.202563	0.69344
Autophagy	7	166	0.011632	0.101285	0.20257	0.693424
Cytosolic iron-sulfur cluster assembly	2	23	0.00161166	0.103437	0.206875	0.684293
Inhibition of DNA recombination at telomere	3	48	0.00336346	0.106116	0.212233	0.673187
Purine ribonucleoside monophosphate biosynthesis	3	48	0.00336346	0.106116	0.212233	0.673187
Activated PKN1 stimulates transcription of AR (androgen receptor) regulated genes KLK2 and KLK3	3	49	0.00343354	0.11104	0.22208	0.65349
Phosphorylation of proteins involved in the G2/M transition by Cyclin A:Cdc2 complexes	1	5	0.000350361	0.111386	0.222772	0.65214
Signaling by plasma membrane FGFR1 fusions	1	5	0.000350361	0.111386	0.222772	0.65214
Diseases of Mismatch Repair (MMR)	1	5	0.000350361	0.111386	0.222772	0.65214
COPI-dependent Golgi-to-ER retrograde traffic	5	107	0.00749772	0.111668	0.223336	0.651041
RNA Polymerase I Transcription Initiation	3	50	0.00350361	0.11605	0.230201	0.637893
HATs acetylate histones	5	110	0.00770794	0.121466	0.230201	0.637893
Transport of Mature mRNA derived from an Intron-Containing Transcript	4	81	0.00567585	0.126953	0.230201	0.637893
Transcription of the HIV genome	4	81	0.00567585	0.126953	0.230201	0.637893
Translocation of SLC2A4 (GLUT4) to the plasma membrane	4	81	0.00567585	0.126953	0.230201	0.637893
Export of Viral Ribonucleoproteins from Nucleus	3	54	0.0037839	0.136896	0.230201	0.637893
TP53 regulates transcription of several additional cell death genes whose specific roles in p53-dependent apoptosis remain uncertain	2	28	0.00196202	0.142323	0.230201	0.637893
AUF1 (hnRNP D0) binds and destabilizes mRNA	3	56	0.00392404	0.147766	0.230201	0.637893
Intraflagellar transport	3	56	0.00392404	0.147766	0.230201	0.637893
Prefoldin mediated transfer of substrate to CCT/TriC	2	29	0.00203209	0.150433	0.230201	0.637893
SUMO is transferred from E1 to E2 (UBE2I, UBC9)	1	7	0.000490505	0.152395	0.230201	0.637893
G2/M DNA replication checkpoint	1	7	0.000490505	0.152395	0.230201	0.637893
RNA Polymerase II Pre-transcription Events	4	88	0.00616635	0.156695	0.230201	0.637893
Neurodegenerative Diseases	2	30	0.00210217	0.158633	0.230201	0.637893
Deregulated CDK5 triggers multiple neurodegenerative pathways in Alzheimer's disease models	2	30	0.00210217	0.158633	0.230201	0.637893
Signaling by FLT3 ITD and TKD mutants	2	30	0.00210217	0.158633	0.230201	0.637893
mRNA 3'-end processing	3	58	0.00406419	0.158905	0.230201	0.637893
Estrogen-dependent gene expression	6	154	0.0107911	0.159921	0.230201	0.637893
PIWI-interacting RNA (piRNA) biogenesis	2	31	0.00217224	0.166914	0.230201	0.637893
ALKBH2 mediated reversal of alkylation damage	1	8	0.000560577	0.172187	0.230201	0.637893
Plus-strand DNA synthesis	1	8	0.000560577	0.172187	0.230201	0.637893
SUMO is conjugated to E1 (UBA2:SAE1)	1	8	0.000560577	0.172187	0.230201	0.637893
PTK6 Regulates Cell Cycle	1	8	0.000560577	0.172187	0.230201	0.637893
Noncanonical activation of NOTCH3	1	8	0.000560577	0.172187	0.230201	0.637893
VEGF ligand-receptor interactions	1	8	0.000560577	0.172187	0.230201	0.637893
Phosphorylation of Emi1	1	8	0.000560577	0.172187	0.230201	0.637893
VEGF binds to VEGFR leading to receptor dimerization	1	8	0.000560577	0.172187	0.230201	0.637893
Cyclin A/B1/B2 associated events during G2/M transition	2	32	0.00224231	0.175267	0.230201	0.637893
Postmitotic nuclear pore complex (NPC) reformation	2	32	0.00224231	0.175267	0.230201	0.637893
Signaling by FLT3 fusion proteins	2	32	0.00224231	0.175267	0.230201	0.637893
Organelle biogenesis and maintenance	11	338	0.0236844	0.179892	0.230201	0.637893
SUMOylation of chromatin organization proteins	3	62	0.00434447	0.181904	0.230201	0.637893
RNA Polymerase I Transcription Termination	2	33	0.00231238	0.183686	0.230201	0.637893
Defective Intrinsic Pathway for Apoptosis	2	33	0.00231238	0.183686	0.230201	0.637893
Transport of nucleosides and free purine and pyrimidine bases across the plasma membrane	2	33	0.00231238	0.183686	0.230201	0.637893
Uncoating of the HIV Virion	1	9	0.00063065	0.191517	0.230201	0.637893
Activation of NIMA Kinases NEK9, NEK6, NEK7	1	9	0.00063065	0.191517	0.230201	0.637893
Post NMDA receptor activation events	4	96	0.00672693	0.193474	0.230201	0.637893
Deadenylation-dependent mRNA decay	3	65	0.00455469	0.199701	0.230201	0.637893
Programmed Cell Death	8	238	0.0166772	0.204106	0.230201	0.637893
Activation of BH3-only proteins	2	36	0.0025226	0.209255	0.230201	0.637893
Downregulation of ERBB2 signaling	2	36	0.0025226	0.209255	0.230201	0.637893
NR1H2 & NR1H3 regulate gene expression to limit cholesterol uptake	1	10	0.000700722	0.210398	0.230201	0.637893
Uptake and function of diphtheria toxin	1	10	0.000700722	0.210398	0.230201	0.637893
Displacement of DNA glycosylase by APEX1	1	10	0.000700722	0.210398	0.230201	0.637893
Formation of the beta-catenin:TCF transactivating complex	3	67	0.00469484	0.211788	0.230201	0.637893
Tetrahydrobiopterin (BH4) synthesis, recycling, salvage and regulation	2	37	0.00259267	0.21786	0.230201	0.637893
Regulation of necroptotic cell death	2	38	0.00266274	0.226496	0.230201	0.637893
Apoptotic cleavage of cellular proteins	2	38	0.00266274	0.226496	0.230201	0.637893
Reverse Transcription of HIV RNA	1	11	0.000770794	0.228839	0.230201	0.637893
Minus-strand DNA synthesis	1	11	0.000770794	0.228839	0.230201	0.637893
Formation of annular gap junctions	1	11	0.000770794	0.228839	0.230201	0.637893
Synthesis of GDP-mannose	1	11	0.000770794	0.228839	0.230201	0.637893
tRNA processing in the nucleus	3	70	0.00490505	0.230201	0.230201	0.637893
Regulation of PTEN gene transcription	3	70	0.00490505	0.230201	0.230201	0.637893
Tat-mediated HIV elongation arrest and recovery	2	39	0.00273281	0.235155	0.235155	0.628646
Transport of the SLBP independent Mature mRNA	2	39	0.00273281	0.235155	0.235155	0.628646
Pausing and recovery of Tat-mediated HIV elongation	2	39	0.00273281	0.235155	0.235155	0.628646
Regulation of TP53 Activity through Acetylation	2	39	0.00273281	0.235155	0.235155	0.628646
HIV elongation arrest and recovery	2	40	0.00280289	0.243833	0.243833	0.612908
Pausing and recovery of HIV elongation	2	40	0.00280289	0.243833	0.243833	0.612908
Association of TriC/CCT with target proteins during biosynthesis	2	40	0.00280289	0.243833	0.243833	0.612908
Gap junction degradation	1	12	0.000840866	0.24685	0.24685	0.607567
Calcineurin activates NFAT	1	12	0.000840866	0.24685	0.24685	0.607567
Activation of the TFAP2 (AP-2) family of transcription factors	1	12	0.000840866	0.24685	0.24685	0.607567
VLDLR internalisation and degradation	1	12	0.000840866	0.24685	0.24685	0.607567
COPI-mediated anterograde transport	4	107	0.00749772	0.247769	0.247769	0.605954
Nuclear import of Rev protein	2	41	0.00287296	0.252523	0.252523	0.597699
Nuclear Pore Complex (NPC) Disassembly	2	42	0.00294303	0.26122	0.26122	0.582993
CDK-mediated phosphorylation and removal of Cdc6	3	75	0.00525541	0.261484	0.261484	0.582554
Binding and entry of HIV virion	1	13	0.000910938	0.264442	0.264442	0.577669
Pexophagy	1	13	0.000910938	0.264442	0.264442	0.577669
Processing and activation of SUMO	1	13	0.000910938	0.264442	0.264442	0.577669
WNT5A-dependent internalization of FZD2, FZD5 and ROR2	1	13	0.000910938	0.264442	0.264442	0.577669
MAPK3 (ERK1) activation	1	13	0.000910938	0.264442	0.264442	0.577669
Transcriptional regulation by RUNX2	5	147	0.0103006	0.268631	0.268631	0.570844
FLT3 signaling in disease	2	43	0.0030131	0.26992	0.26992	0.568764
Golgi-to-ER retrograde transport	5	148	0.0103707	0.273096	0.273096	0.563684
Regulated Necrosis	3	77	0.00539556	0.274152	0.274152	0.562008
MHC class II antigen presentation	5	149	0.0104408	0.277578	0.277578	0.556616
Activation of NMDA receptors and postsynaptic events	4	113	0.00791816	0.278666	0.278666	0.554915
RUNX1 regulates genes involved in megakaryocyte differentiation and platelet function	3	78	0.00546563	0.28051	0.28051	0.552051
vRNP Assembly	1	14	0.00098101	0.281624	0.281624	0.55033
RHO GTPases activate PKNs	3	80	0.00560577	0.293265	0.293265	0.532739
Transport of Mature mRNA Derived from an Intronless Transcript	2	46	0.00322332	0.295987	0.295987	0.528727
RHOF GTPase cycle	2	46	0.00322332	0.295987	0.295987	0.528727
RIPK1-mediated regulated necrosis	2	46	0.00322332	0.295987	0.295987	0.528727
Sensing of DNA Double Strand Breaks	1	15	0.00105108	0.298407	0.298407	0.525192
Viral RNP Complexes in the Host Cell Nucleus	1	15	0.00105108	0.298407	0.298407	0.525192
Apoptosis	6	192	0.0134539	0.302334	0.302334	0.519513
RNA Polymerase II Transcription Pre-Initiation And Promoter Opening	2	47	0.00329339	0.30465	0.30465	0.516198
Nuclear signaling by ERBB4	2	47	0.00329339	0.30465	0.30465	0.516198
Factors involved in megakaryocyte development and platelet production	6	194	0.013594	0.310498	0.310498	0.507942
Regulation of APC/C activators between G1/S and early anaphase	3	83	0.00581599	0.312463	0.312463	0.505202
TP53 Regulates Transcription of Cell Death Genes	3	83	0.00581599	0.312463	0.312463	0.505202
Scavenging by Class F Receptors	1	16	0.00112115	0.314798	0.314798	0.501968
Constitutive Signaling by Overexpressed ERBB2	1	16	0.00112115	0.314798	0.314798	0.501968
Advanced glycosylation endproduct receptor signaling	1	16	0.00112115	0.314798	0.314798	0.501968
Reversal of alkylation damage by DNA dioxygenases	1	16	0.00112115	0.314798	0.314798	0.501968
SUMOylation of DNA methylation proteins	1	16	0.00112115	0.314798	0.314798	0.501968
AKT phosphorylates targets in the cytosol	1	16	0.00112115	0.314798	0.314798	0.501968
Formation of HIV-1 elongation complex containing HIV-1 Tat	2	49	0.00343354	0.321914	0.321914	0.49226
Formation of HIV elongation complex in the absence of HIV Tat	2	50	0.00350361	0.330507	0.330507	0.48082
Citric acid cycle (TCA cycle)	2	50	0.00350361	0.330507	0.330507	0.48082
Golgi Cisternae Pericentriolar Stack Reorganization	1	17	0.00119123	0.330807	0.330807	0.480425
ER to Golgi Anterograde Transport	5	164	0.0114918	0.346173	0.346173	0.460706
NRIF signals cell death from the nucleus	1	18	0.0012613	0.346443	0.346443	0.460368
Prolactin receptor signaling	1	18	0.0012613	0.346443	0.346443	0.460368
HIV Transcription Initiation	2	52	0.00364375	0.347598	0.347598	0.458923
RNA Polymerase II Transcription Initiation	2	52	0.00364375	0.347598	0.347598	0.458923
Tat-mediated elongation of the HIV-1 transcript	2	52	0.00364375	0.347598	0.347598	0.458923
HIV Transcription Elongation	2	52	0.00364375	0.347598	0.347598	0.458923
RNA Polymerase II HIV Promoter Escape	2	52	0.00364375	0.347598	0.347598	0.458923
RNA Polymerase II Promoter Escape	2	53	0.00371383	0.35609	0.35609	0.44844
NEP/NS2 Interacts with the Cellular Export Machinery	2	53	0.00371383	0.35609	0.35609	0.44844
DNA Damage Reversal	1	19	0.00133137	0.361715	0.361715	0.441633
Sema3A PAK dependent Axon repulsion	1	19	0.00133137	0.361715	0.361715	0.441633
L1CAM interactions	4	130	0.00910938	0.368486	0.368486	0.433579
Regulation of mitotic cell cycle	3	92	0.00644664	0.370058	0.370058	0.431731
APC/C-mediated degradation of cell cycle proteins	3	92	0.00644664	0.370058	0.370058	0.431731
RNA Polymerase II Transcription Initiation And Promoter Clearance	2	55	0.00385397	0.372952	0.372952	0.428348
Regulation of mRNA stability by proteins that bind AU-rich elements	3	93	0.00651671	0.37642	0.37642	0.424327
Phosphorylation of the APC/C	1	20	0.00140144	0.376632	0.376632	0.424083
WNT5A-dependent internalization of FZD4	1	20	0.00140144	0.376632	0.376632	0.424083
TP53 Regulates Transcription of Caspase Activators and Caspases	1	20	0.00140144	0.376632	0.376632	0.424083
Interleukin-4 and Interleukin-13 signaling	6	211	0.0147852	0.380964	0.380964	0.419116
Inhibition of the proteolytic activity of APC/C required for the onset of anaphase by mitotic spindle checkpoint components	1	21	0.00147152	0.3912	0.3912	0.407601
Inactivation of APC/C via direct inhibition of the APC/C complex	1	21	0.00147152	0.3912	0.3912	0.407601
GDP-fucose biosynthesis	1	21	0.00147152	0.3912	0.3912	0.407601
TFAP2 (AP-2) family regulates transcription of growth factors and their receptors	1	21	0.00147152	0.3912	0.3912	0.407601
Constitutive Signaling by EGFRvIII	1	22	0.00154159	0.405429	0.405429	0.392085
Signaling by EGFRvIII in Cancer	1	22	0.00154159	0.405429	0.405429	0.392085
Synthesis, secretion, and inactivation of Glucose-dependent Insulinotropic Polypeptide (GIP)	1	22	0.00154159	0.405429	0.405429	0.392085
Metabolism of ingested H2SeO4 and H2SeO3 into H2Se	1	22	0.00154159	0.405429	0.405429	0.392085
Signaling by NOTCH	7	259	0.0181487	0.412507	0.412507	0.384568
Chaperone Mediated Autophagy	1	23	0.00161166	0.419327	0.419327	0.377447
RNA Polymerase III Transcription Termination	1	23	0.00161166	0.419327	0.419327	0.377447
Signaling by ERBB2 ECD mutants	1	23	0.00161166	0.419327	0.419327	0.377447
Regulation of TP53 Activity through Methylation	1	23	0.00161166	0.419327	0.419327	0.377447
Disease	59	2431	0.170345	0.430954	0.430954	0.365569
APC/C:Cdc20 mediated degradation of Cyclin B	1	24	0.00168173	0.432901	0.432901	0.363612
RHOBTB2 GTPase cycle	1	24	0.00168173	0.432901	0.432901	0.363612
Pyrimidine biosynthesis	1	24	0.00168173	0.432901	0.432901	0.363612
HDACs deacetylate histones	2	63	0.00441455	0.438413	0.438413	0.358117
Formation of RNA Pol II elongation complex	2	63	0.00441455	0.438413	0.438413	0.358117
Negative regulation of MET activity	1	25	0.0017518	0.446158	0.446158	0.350511
Intrinsic Pathway for Apoptosis	2	64	0.00448462	0.446338	0.446338	0.350336
RUNX1 regulates transcription of genes involved in differentiation of HSCs	3	106	0.00742765	0.457467	0.457467	0.33964
Signaling by Ligand-Responsive EGFR Variants in Cancer	1	26	0.00182188	0.459106	0.459106	0.338087
Constitutive Signaling by Ligand-Responsive EGFR Cancer Variants	1	26	0.00182188	0.459106	0.459106	0.338087
APC-Cdc20 mediated degradation of Nek2A	1	26	0.00182188	0.459106	0.459106	0.338087
MyD88 deficiency (TLR2/4)	1	26	0.00182188	0.459106	0.459106	0.338087
Synthesis, secretion, and deacylation of Ghrelin	1	26	0.00182188	0.459106	0.459106	0.338087
Basigin interactions	1	26	0.00182188	0.459106	0.459106	0.338087
RNA Polymerase II Transcription Elongation	2	66	0.00462476	0.461999	0.461999	0.335359
IRAK4 deficiency (TLR2/4)	1	27	0.00189195	0.471753	0.471753	0.326286
Abortive elongation of HIV-1 transcript in the absence of Tat	1	27	0.00189195	0.471753	0.471753	0.326286
Assembly Of The HIV Virion	1	27	0.00189195	0.471753	0.471753	0.326286
Signaling by ERBB2	2	68	0.00476491	0.477399	0.477399	0.321119
Metabolism of cofactors	2	68	0.00476491	0.477399	0.477399	0.321119
FOXO-mediated transcription	3	110	0.00770794	0.481542	0.481542	0.317366
Deadenylation of mRNA	1	28	0.00196202	0.484104	0.484104	0.315061
FGFR2 alternative splicing	1	28	0.00196202	0.484104	0.484104	0.315061
NOTCH3 Activation and Transmission of Signal to the Nucleus	1	28	0.00196202	0.484104	0.484104	0.315061
RAF-independent MAPK1/3 activation	1	28	0.00196202	0.484104	0.484104	0.315061
Downregulation of TGF-beta receptor signaling	1	28	0.00196202	0.484104	0.484104	0.315061
Mitochondrial protein import	2	69	0.00483498	0.484997	0.484997	0.314261
Detoxification of Reactive Oxygen Species	2	69	0.00483498	0.484997	0.484997	0.314261
Constitutive Signaling by AKT1 E17K in Cancer	1	29	0.00203209	0.496168	0.496168	0.304371
Growth hormone receptor signaling	1	29	0.00203209	0.496168	0.496168	0.304371
Signaling by ERBB2 TMD/JMD mutants	1	30	0.00210217	0.50795	0.50795	0.294179
TRAF6 mediated NF-kB activation	1	30	0.00210217	0.50795	0.50795	0.294179
Influenza Infection	5	200	0.0140144	0.510552	0.510552	0.29196
Cdc20:Phospho-APC/C mediated degradation of Cyclin A	2	73	0.00511527	0.514694	0.514694	0.288451
MicroRNA (miRNA) biogenesis	1	31	0.00217224	0.519458	0.519458	0.28445
APC:Cdc20 mediated degradation of cell cycle proteins prior to satisfation of the cell cycle checkpoint	2	74	0.00518534	0.52194	0.52194	0.282379
Signaling by EGFR in Cancer	1	32	0.00224231	0.530697	0.530697	0.275153
Metalloprotease DUBs	1	32	0.00224231	0.530697	0.530697	0.275153
Urea cycle	1	32	0.00224231	0.530697	0.530697	0.275153
APC/C:Cdc20 mediated degradation of mitotic proteins	2	76	0.00532549	0.536214	0.536214	0.270662
Synthesis of active ubiquitin: roles of E1 and E2 enzymes	1	33	0.00231238	0.541674	0.541674	0.266262
TP53 Regulates Transcription of Genes Involved in Cytochrome C Release	1	33	0.00231238	0.541674	0.541674	0.266262
Activation of APC/C and APC/C:Cdc20 mediated degradation of mitotic proteins	2	77	0.00539556	0.54324	0.54324	0.265008
Telomere Extension By Telomerase	1	34	0.00238245	0.552395	0.552395	0.25775
Pyroptosis	1	34	0.00238245	0.552395	0.552395	0.25775
RHOC GTPase cycle	2	79	0.0055357	0.55707	0.55707	0.25409
Hedgehog 'off' state	3	124	0.00868895	0.561456	0.561456	0.250684
Signaling by ERBB2 KD Mutants	1	35	0.00245253	0.562866	0.562866	0.249595
ESR-mediated signaling	6	257	0.0180085	0.566863	0.566863	0.246522
Defective TPR may confer susceptibility towards thyroid papillary carcinoma (TPC)	1	36	0.0025226	0.573093	0.573093	0.241775
Signaling by ERBB2 in Cancer	1	36	0.0025226	0.573093	0.573093	0.241775
Regulation of TLR by endogenous ligand	1	36	0.0025226	0.573093	0.573093	0.241775
RHOBTB GTPase Cycle	1	36	0.0025226	0.573093	0.573093	0.241775
TGF-beta receptor signaling activates SMADs	1	36	0.0025226	0.573093	0.573093	0.241775
PTEN Regulation	4	171	0.0119823	0.575139	0.575139	0.240227
Signaling by ERBB4	2	82	0.00574592	0.577252	0.577252	0.238634
SARS-CoV Infections	5	217	0.0152057	0.582515	0.582515	0.234693
Budding and maturation of HIV virion	1	37	0.00259267	0.583082	0.583082	0.234271
eNOS activation	1	37	0.00259267	0.583082	0.583082	0.234271
Formation of the HIV-1 Early Elongation Complex	1	37	0.00259267	0.583082	0.583082	0.234271
Formation of the Early Elongation Complex	1	37	0.00259267	0.583082	0.583082	0.234271
Cargo concentration in the ER	1	37	0.00259267	0.583082	0.583082	0.234271
ISG15 antiviral mechanism	2	83	0.00581599	0.583829	0.583829	0.233714
Protein ubiquitination	2	84	0.00588606	0.59033	0.59033	0.228905
Transport to the Golgi and subsequent modification	5	219	0.0153458	0.590606	0.590606	0.228702
Intra-Golgi and retrograde Golgi-to-ER traffic	5	219	0.0153458	0.590606	0.590606	0.228702
RHOH GTPase cycle	1	38	0.00266274	0.592837	0.592837	0.227065
SMAD2/SMAD3:SMAD4 heterotrimer regulates transcription	1	38	0.00266274	0.592837	0.592837	0.227065
SUMOylation of SUMOylation proteins	1	39	0.00273281	0.602364	0.602364	0.220141
TAK1 activates NFkB by phosphorylation and activation of IKKs complex	1	39	0.00273281	0.602364	0.602364	0.220141
RUNX1 interacts with co-factors whose precise effect on RUNX1 targets is not known	1	39	0.00273281	0.602364	0.602364	0.220141
FGFR1 mutant receptor activation	1	39	0.00273281	0.602364	0.602364	0.220141
Infectious disease	31	1357	0.0950879	0.603926	0.603926	0.219016
Signaling by TGF-beta Receptor Complex	2	87	0.00609628	0.609379	0.609379	0.215112
Regulation of Glucokinase by Glucokinase Regulatory Protein	1	40	0.00280289	0.61167	0.61167	0.213483
Metabolism of nitric oxide: NOS3 activation and regulation	1	41	0.00287296	0.620758	0.620758	0.207078
Amyloid fiber formation	2	89	0.00623642	0.621701	0.621701	0.206419
Diseases of Immune System	1	42	0.00294303	0.629634	0.629634	0.200912
Diseases associated with the TLR signaling cascade	1	42	0.00294303	0.629634	0.629634	0.200912
Plasma lipoprotein clearance	1	42	0.00294303	0.629634	0.629634	0.200912
SUMOylation of ubiquitinylation proteins	1	43	0.0030131	0.638303	0.638303	0.194973
Lysosome Vesicle Biogenesis	1	43	0.0030131	0.638303	0.638303	0.194973
RAC2 GTPase cycle	2	92	0.00644664	0.639618	0.639618	0.194079
RND2 GTPase cycle	1	44	0.00308318	0.64677	0.64677	0.18925
VEGFR2 mediated vascular permeability	1	44	0.00308318	0.64677	0.64677	0.18925
Synthesis, secretion, and inactivation of Glucagon-like Peptide-1 (GLP-1)	1	44	0.00308318	0.64677	0.64677	0.18925
SUMOylation of transcription cofactors	1	44	0.00308318	0.64677	0.64677	0.18925
Ovarian tumor domain proteases	1	44	0.00308318	0.64677	0.64677	0.18925
Antiviral mechanism by IFN-stimulated genes	2	94	0.00658678	0.651189	0.651189	0.186293
Major pathway of rRNA processing in the nucleolus and cytosol	4	189	0.0132436	0.653108	0.653108	0.185015
XBP1(S) activates chaperone genes	2	95	0.00665686	0.656863	0.656863	0.182525
NS1 Mediated Effects on Host Pathways	1	46	0.00322332	0.663115	0.663115	0.178411
RNA Polymerase III Abortive And Retractive Initiation	1	46	0.00322332	0.663115	0.663115	0.178411
RNA Polymerase III Transcription	1	46	0.00322332	0.663115	0.663115	0.178411
Transport of Ribonucleoproteins into the Host Nucleus	1	48	0.00336346	0.678706	0.678706	0.168318
Incretin synthesis, secretion, and inactivation	1	48	0.00336346	0.678706	0.678706	0.168318
RAC3 GTPase cycle	2	100	0.00700722	0.684132	0.684132	0.16486
DDX58/IFIH1-mediated induction of interferon-alpha/beta	2	100	0.00700722	0.684132	0.684132	0.16486
Pyruvate metabolism and Citric Acid (TCA) cycle	2	100	0.00700722	0.684132	0.684132	0.16486
Signaling by FGFR1 in disease	1	49	0.00343354	0.686229	0.686229	0.163531
IRE1alpha activates chaperones	2	101	0.00707729	0.689369	0.689369	0.161548
Neutrophil degranulation	10	480	0.0336346	0.69877	0.69877	0.155666
SUMOylation of RNA binding proteins	1	51	0.00357368	0.700753	0.700753	0.154435
TBC/RABGAPs	1	51	0.00357368	0.700753	0.700753	0.154435
TNF signaling	1	51	0.00357368	0.700753	0.700753	0.154435
Signaling by SCF-KIT	1	51	0.00357368	0.700753	0.700753	0.154435
rRNA processing in the nucleus and cytosol	4	207	0.0145049	0.720946	0.720946	0.142097
Ubiquitin-dependent degradation of Cyclin D	1	54	0.0037839	0.721292	0.721292	0.141889
p53-Independent G1/S DNA damage checkpoint	1	54	0.0037839	0.721292	0.721292	0.141889
Ubiquitin Mediated Degradation of Phosphorylated Cdc25A	1	54	0.0037839	0.721292	0.721292	0.141889
p53-Independent DNA Damage Response	1	54	0.0037839	0.721292	0.721292	0.141889
Autodegradation of the E3 ubiquitin ligase COP1	1	54	0.0037839	0.721292	0.721292	0.141889
Transport of vitamins, nucleosides, and related molecules	2	108	0.00756779	0.724051	0.724051	0.140231
EPH-ephrin mediated repulsion of cells	1	55	0.00385397	0.727821	0.727821	0.137975
Glycolysis	2	110	0.00770794	0.733341	0.733341	0.134694
Transcriptional activity of SMAD2/SMAD3:SMAD4 heterotrimer	1	57	0.00399411	0.740426	0.740426	0.130519
Stabilization of p53	1	59	0.00413426	0.752448	0.752448	0.123524
RHOJ GTPase cycle	1	59	0.00413426	0.752448	0.752448	0.123524
Complex I biogenesis	1	59	0.00413426	0.752448	0.752448	0.123524
Signaling by Interleukins	13	643	0.0450564	0.753217	0.753217	0.12308
Uptake and actions of bacterial toxins	1	60	0.00420433	0.758249	0.758249	0.120188
Signaling by Hedgehog	3	168	0.0117721	0.758785	0.758785	0.119881
Signaling by TGFB family members	2	116	0.00812837	0.759631	0.759631	0.119397
E3 ubiquitin ligases ubiquitinate target proteins	1	61	0.0042744	0.763914	0.763914	0.116955
Signaling by EGFR	1	61	0.0042744	0.763914	0.763914	0.116955
Post-translational protein modification	34	1598	0.111975	0.764633	0.764633	0.116547
Transcriptional regulation by RUNX3	2	118	0.00826852	0.767884	0.767884	0.114704
Translation initiation complex formation	1	62	0.00434447	0.769448	0.769448	0.113821
Signaling by NOTCH3	1	63	0.00441455	0.774852	0.774852	0.110781
Ribosomal scanning and start codon recognition	1	64	0.00448462	0.780129	0.780129	0.107833
Ion homeostasis	1	64	0.00448462	0.780129	0.780129	0.107833
HCMV Late Events	3	175	0.0122626	0.782476	0.782476	0.106529
Activation of the mRNA upon binding of the cap-binding complex and eIFs, and subsequent binding to 43S	1	66	0.00462476	0.790317	0.790317	0.102198
Signaling by ALK fusions and activated point mutants	1	66	0.00462476	0.790317	0.790317	0.102198
Signaling by ALK in cancer	1	66	0.00462476	0.790317	0.790317	0.102198
Neurotransmitter receptors and postsynaptic signal transmission	4	232	0.0162567	0.798175	0.798175	0.0979017
RAB geranylgeranylation	1	68	0.00476491	0.800035	0.800035	0.0968911
tRNA processing	3	182	0.0127531	0.804219	0.804219	0.0946258
Signaling by Nuclear Receptors	7	387	0.0271179	0.809308	0.809308	0.0918863
rRNA modification in the nucleus and cytosol	1	71	0.00497512	0.813775	0.813775	0.0894955
Ion transport by P-type ATPases	1	71	0.00497512	0.813775	0.813775	0.0894955
Semaphorin interactions	1	71	0.00497512	0.813775	0.813775	0.0894955
Signaling by PTK6	1	71	0.00497512	0.813775	0.813775	0.0894955
Signaling by Non-Receptor Tyrosine Kinases	1	71	0.00497512	0.813775	0.813775	0.0894955
Synthesis of substrates in N-glycan biosythesis	2	131	0.00917945	0.815737	0.815737	0.0884499
Viral Messenger RNA Synthesis	1	72	0.0050452	0.818143	0.818143	0.0871708
Regulation of PTEN stability and activity	1	74	0.00518534	0.826574	0.826574	0.0827181
RHOB GTPase cycle	1	75	0.00525541	0.830643	0.830643	0.0805858
rRNA processing	4	245	0.0171677	0.83099	0.83099	0.0804042
Signaling by VEGF	2	138	0.00966996	0.837684	0.837684	0.0769199
COPII-mediated vesicle transport	1	77	0.00539556	0.838496	0.838496	0.076499
RHOG GTPase cycle	1	78	0.00546563	0.842286	0.842286	0.0745406
Glucose metabolism	2	140	0.0098101	0.843506	0.843506	0.0739116
Platelet degranulation	2	141	0.00988018	0.846346	0.846346	0.072452
trans-Golgi Network Vesicle Budding	1	80	0.00560577	0.849601	0.849601	0.0707852
Purine catabolism	1	80	0.00560577	0.849601	0.849601	0.0707852
Cell death signalling via NRAGE, NRIF and NADE	1	81	0.00567585	0.85313	0.85313	0.0689847
Signaling by FGFR in disease	1	82	0.00574592	0.856577	0.856577	0.0672334
Regulation of RUNX2 expression and activity	1	83	0.00581599	0.859944	0.859944	0.06553
Response to elevated platelet cytosolic Ca2+	2	148	0.0103707	0.864949	0.864949	0.0630093
Transcriptional regulation by RUNX1	4	261	0.0182888	0.865176	0.865176	0.0628957
NR1H2 and NR1H3-mediated signaling	1	85	0.00595613	0.866442	0.866442	0.0622605
Asparagine N-linked glycosylation	7	421	0.0295004	0.869921	0.869921	0.0605204
Regulation of cholesterol biosynthesis by SREBP (SREBF)	1	87	0.00609628	0.87264	0.87264	0.0591651
PIP3 activates AKT signaling	5	319	0.022353	0.873176	0.873176	0.0588982
Signaling by MET	1	88	0.00616635	0.87563	0.87563	0.0576794
Signaling by FGFR2	1	88	0.00616635	0.87563	0.87563	0.0576794
Transcriptional activation of mitochondrial biogenesis	1	88	0.00616635	0.87563	0.87563	0.0576794
RHOA GTPase cycle	2	154	0.0107911	0.87923	0.87923	0.0558975
Unfolded Protein Response (UPR)	2	155	0.0108612	0.88147	0.88147	0.0547923
Downstream signaling events of B Cell Receptor (BCR)	1	91	0.00637657	0.884188	0.884188	0.0534556
TCF dependent signaling in response to WNT	3	216	0.0151356	0.885442	0.885442	0.0528398
CDC42 GTPase cycle	2	159	0.0111415	0.890054	0.890054	0.0505838
Death Receptor Signalling	2	159	0.0111415	0.890054	0.890054	0.0505838
Biosynthesis of the N-glycan precursor (dolichol lipid-linked oligosaccharide, LLO) and transfer to a nascent protein	2	159	0.0111415	0.890054	0.890054	0.0505838
Mitochondrial translation termination	1	94	0.00658678	0.892158	0.892158	0.0495582
Mitochondrial translation elongation	1	94	0.00658678	0.892158	0.892158	0.0495582
MyD88 cascade initiated on plasma membrane	1	94	0.00658678	0.892158	0.892158	0.0495582
Toll Like Receptor 5 (TLR5) Cascade	1	94	0.00658678	0.892158	0.892158	0.0495582
Toll Like Receptor 10 (TLR10) Cascade	1	94	0.00658678	0.892158	0.892158	0.0495582
Mitochondrial translation initiation	1	96	0.00672693	0.897165	0.897165	0.0471274
Plasma lipoprotein assembly, remodeling, and clearance	1	98	0.00686707	0.901941	0.901941	0.0448219
PCP/CE pathway	1	99	0.00693715	0.904245	0.904245	0.0437138
TRAF6 mediated induction of NFkB and MAP kinases upon TLR7/8 or 9 activation	1	101	0.00707729	0.908693	0.908693	0.0415829
Protein localization	2	170	0.0119123	0.910777	0.910777	0.0405882
Mitochondrial translation	1	102	0.00714736	0.910839	0.910839	0.0405585
EPH-Ephrin signaling	1	102	0.00714736	0.910839	0.910839	0.0405585
Toll Like Receptor 3 (TLR3) Cascade	1	102	0.00714736	0.910839	0.910839	0.0405585
MyD88 dependent cascade initiated on endosome	1	102	0.00714736	0.910839	0.910839	0.0405585
Toll Like Receptor 7/8 (TLR7/8) Cascade	1	103	0.00721743	0.912935	0.912935	0.0395604
MAPK6/MAPK4 signaling	1	106	0.00742765	0.918931	0.918931	0.0367169
Toll Like Receptor 9 (TLR9) Cascade	1	106	0.00742765	0.918931	0.918931	0.0367169
RHO GTPase cycle	7	460	0.0322332	0.919002	0.919002	0.0366834
Influenza Viral RNA Transcription and Replication	2	176	0.0123327	0.920481	0.920481	0.0359851
The citric acid (TCA) cycle and respiratory electron transport	3	238	0.0166772	0.920506	0.920506	0.0359733
Signaling by FGFR	1	107	0.00749772	0.920837	0.920837	0.035817
TRIF(TICAM1)-mediated TLR4 signaling	1	107	0.00749772	0.920837	0.920837	0.035817
MyD88-independent TLR4 cascade	1	107	0.00749772	0.920837	0.920837	0.035817
Neddylation	3	241	0.0168874	0.924445	0.924445	0.0341188
Transcriptional regulation of white adipocyte differentiation	1	109	0.00763787	0.924517	0.924517	0.0340853
Interleukin-1 signaling	1	109	0.00763787	0.924517	0.924517	0.0340853
p75 NTR receptor-mediated signalling	1	110	0.00770794	0.926292	0.926292	0.0332523
Extra-nuclear estrogen signaling	1	111	0.00777801	0.928025	0.928025	0.0324403
Intracellular signaling by second messengers	5	366	0.0256464	0.934169	0.934169	0.0295747
Cargo recognition for clathrin-mediated endocytosis	1	115	0.0080583	0.934562	0.934562	0.029392
MyD88:MAL(TIRAP) cascade initiated on plasma membrane	1	118	0.00826852	0.939073	0.939073	0.0273008
Toll Like Receptor TLR6:TLR2 Cascade	1	118	0.00826852	0.939073	0.939073	0.0273008
Respiratory electron transport	1	118	0.00826852	0.939073	0.939073	0.0273008
SRP-dependent cotranslational protein targeting to membrane	1	119	0.00833859	0.940506	0.940506	0.0266383
RAC1 GTPase cycle	2	191	0.0133838	0.94058	0.94058	0.0266043
Metabolism of water-soluble vitamins and cofactors	3	256	0.0179385	0.941591	0.941591	0.0261375
L13a-mediated translational silencing of Ceruloplasmin expression	1	120	0.00840866	0.941906	0.941906	0.0259923
GTP hydrolysis and joining of the 60S ribosomal subunit	1	120	0.00840866	0.941906	0.941906	0.0259923
Toll Like Receptor TLR1:TLR2 Cascade	1	121	0.00847873	0.943274	0.943274	0.0253623
Toll Like Receptor 2 (TLR2) Cascade	1	121	0.00847873	0.943274	0.943274	0.0253623
Nonsense Mediated Decay (NMD) enhanced by the Exon Junction Complex (EJC)	1	124	0.00868895	0.947186	0.947186	0.0235649
Nonsense-Mediated Decay (NMD)	1	124	0.00868895	0.947186	0.947186	0.0235649
PI3K/AKT Signaling in Cancer	1	124	0.00868895	0.947186	0.947186	0.0235649
TP53 Regulates Metabolic Genes	1	126	0.00882909	0.949643	0.949643	0.0224396
VEGFA-VEGFR2 Pathway	1	127	0.00889917	0.950829	0.950829	0.0218978
Peptide hormone metabolism	1	127	0.00889917	0.950829	0.950829	0.0218978
Mitochondrial biogenesis	1	128	0.00896924	0.951986	0.951986	0.0213693
Cap-dependent Translation Initiation	1	130	0.00910938	0.954221	0.954221	0.020351
Eukaryotic Translation Initiation	1	130	0.00910938	0.954221	0.954221	0.020351
Signaling by WNT	4	332	0.023264	0.95458	0.95458	0.0201878
Rab regulation of trafficking	1	131	0.00917945	0.955299	0.955299	0.0198606
Cellular response to chemical stress	2	212	0.0148553	0.960777	0.960777	0.0173772
Transmission across Chemical Synapses	4	343	0.0240348	0.96203	0.96203	0.0168113
Cardiac conduction	1	138	0.00966996	0.962169	0.962169	0.0167485
Metabolism of proteins	41	2205	0.154509	0.962793	0.962793	0.0164672
Nucleotide catabolism	1	144	0.0100904	0.967213	0.967213	0.0144777
Deubiquitination	3	289	0.0202509	0.96742	0.96742	0.0143847
Toll Like Receptor 4 (TLR4) Cascade	1	151	0.0105809	0.972257	0.972257	0.012219
Respiratory electron transport, ATP synthesis by chemiosmotic coupling, and heat production by uncoupling proteins.	1	153	0.010721	0.97355	0.97355	0.0116417
Regulation of actin dynamics for phagocytic cup formation	1	158	0.0110714	0.976526	0.976526	0.0103161
Clathrin-mediated endocytosis	1	161	0.0112816	0.978149	0.978149	0.00959493
Metabolism of vitamins and cofactors	4	379	0.0265574	0.979223	0.979223	0.00911826
Signaling by Receptor Tyrosine Kinases	8	618	0.0433046	0.979381	0.979381	0.00904827
Beta-catenin independent WNT signaling	1	166	0.011632	0.980609	0.980609	0.00850405
Interleukin-1 family signaling	1	167	0.0117021	0.981067	0.981067	0.00830134
Binding and Uptake of Ligands by Scavenger Receptors	1	168	0.0117721	0.981514	0.981514	0.0081035
ER-Phagosome pathway	1	173	0.0121225	0.983596	0.983596	0.00718316
Axon guidance	7	585	0.0409922	0.985591	0.985591	0.00630347
Selenoamino acid metabolism	1	180	0.012613	0.986124	0.986124	0.00606837
Translation	3	339	0.0237545	0.987057	0.987057	0.00565784
Regulation of expression of SLITs and ROBOs	1	183	0.0128232	0.987085	0.987085	0.00564544
SLC transporter disorders	1	183	0.0128232	0.987085	0.987085	0.00564544
Cytokine Signaling in Immune system	16	1092	0.0765188	0.987226	0.987226	0.00558331
Toll-like Receptor Cascades	1	188	0.0131736	0.988541	0.988541	0.00500524
Signaling by the B Cell Receptor (BCR)	1	189	0.0132436	0.988812	0.988812	0.00488622
Membrane Trafficking	8	667	0.0467381	0.989771	0.989771	0.00446532
Fcgamma receptor (FCGR) dependent phagocytosis	1	193	0.0135239	0.989834	0.989834	0.00443783
Antigen processing-Cross presentation	1	195	0.0136641	0.990309	0.990309	0.00422934
Nervous system development	7	621	0.0435148	0.991656	0.991656	0.00363916
Diseases of signal transduction by growth factor receptors and second messengers	5	498	0.0348959	0.991843	0.991843	0.00355702
Ion channel transport	1	206	0.0144349	0.992553	0.992553	0.00324611
Ub-specific processing proteases	1	206	0.0144349	0.992553	0.992553	0.00324611
Platelet activation, signaling and aggregation	2	293	0.0205311	0.99258	0.99258	0.00323441
Muscle contraction	1	213	0.0149254	0.993704	0.993704	0.00274317
Developmental Biology	18	1263	0.0885012	0.994064	0.994064	0.00258587
Antigen processing: Ubiquitination & Proteasome degradation	2	315	0.0220727	0.995343	0.995343	0.00202735
Signaling by ROBO receptors	1	235	0.016467	0.996286	0.996286	0.0016161
Neuronal System	4	489	0.0342653	0.997107	0.997107	0.00125813
Vesicle-mediated transport	9	827	0.0579497	0.997746	0.997746	0.000980026
Cell surface interactions at the vascular wall	1	257	0.0180085	0.997811	0.997811	0.000951826
Signal Transduction	50	2997	0.210006	0.99843	0.99843	0.00068252
Disorders of transmembrane transporters	1	278	0.0194801	0.998679	0.998679	0.000573968
Hemostasis	8	803	0.056268	0.998768	0.998768	0.000535198
Class I MHC mediated antigen processing & presentation	3	474	0.0332142	0.999096	0.999096	0.000392738
Interferon Signaling	2	394	0.0276084	0.999156	0.999156	0.000366815
SLC-mediated transmembrane transport	2	416	0.02915	0.99948	0.99948	0.000226053
Metabolism of steroids	1	328	0.0229837	0.999605	0.999605	0.000171705
MAPK1/MAPK3 signaling	1	329	0.0230537	0.999614	0.999614	0.000167604
Metabolism of carbohydrates	2	456	0.0319529	0.999786	0.999786	9.30199e-05
Adaptive Immune System	9	1005	0.0704225	0.999879	0.999879	5.26823e-05
MAPK family signaling cascades	1	380	0.0266274	0.999888	0.999888	4.87379e-05
Metabolism of amino acids and derivatives	2	665	0.046598	0.999998	0.999998	7.87292e-07
Innate Immune System	10	1334	0.0934763	0.999999	0.999999	4.6204e-07
Transport of small molecules	4	961	0.0673394	1	1	7.34556e-08
Immune System	29	2684	0.188074	1	1	2.27214e-08
Metabolism of lipids	1	1444	0.101184	1	1	4.33947e-16
Metabolism	26	3646	0.255483	1	1	0
