# Supplementary material for: Decoding the activated stem cell phenotype of the neonatally maturing pituitary
Source: eLife. 2022 Jun 14;11:e75742. doi: 10.7554/eLife.75742 (PMC9333987; doi:10.7554/eLife.75742)
Supplement: Figure 1—figure supplement 2—source data 3. — (A) DEG analysis in Gonado Prog versus SC1+SC2+Prolif SC of neonatal AP. The columns represent: gene names (Gene), p values (p_val), average log fold change expression (avg_logFC; positive values indicate upregulation and negative values downregulation in Gonado Prog), percentage of cells expressing the indicated gene in Gonado Prog (pct.1) and in SC1+SC2+Prolif SC (pct.2), and the FDR adjusted p value (p_val_adj). (B) Gene Ontology (GO) analysis of genes upregulated in Gonado Prog versus SC1+SC2+Prolif SC in neonatal AP. Analysis was performed using Gorilla. Pathway name, p value, FDR q-value, enrichment score [(b/n)/(B/N)], and −log10(FDRq) are shown in the columns. N, total number of genes; B, total number of genes associated with a specific GO term; n, number of genes in the top of the user’s input list or in the target set when appropriate; b, number of genes in the intersection. Associated with Figure 1—figure supplement 2C. [file elife-75742-fig1-figsupp2-data3.xlsx]

## Sheet: A
DEGs Gonado Prog versus SC1+SC2+Prolif SC (neonatal AP)
Gene	p_val	avg_logFC	pct.1	pct.2	p_val_adj
Ascl1	0	2.35808	0.975	0.074	0
Smoc2	0	1.51955	0.833	0.019	0
Pdzrn4	1.50216e-301	1.07076	0.783	0.035	3.73346e-297
Rbm24	1.15119e-278	1.37488	0.769	0.043	2.86118e-274
Lef1	2.05597e-263	0.841364	0.708	0.032	5.10991e-259
Thsd7b	2.86441e-263	0.616746	0.584	0.01	7.1192e-259
Slco3a1	6.37911e-258	1.14784	0.854	0.085	1.58546e-253
Bik	1.89685e-239	1.03841	0.69	0.041	4.71443e-235
Foxl2	5.45152e-234	0.769835	0.537	0.011	1.35492e-229
Pex5l	3.93575e-223	0.967593	0.786	0.081	9.7819e-219
Stmn3	8.00738e-222	0.780067	0.698	0.05	1.99016e-217
Atp8a2	2.82858e-218	0.506815	0.566	0.02	7.03016e-214
Htr3a	5.99059e-209	0.637156	0.712	0.06	1.4889e-204
Dner	5.3262e-205	0.753312	0.776	0.087	1.32377e-200
Mybpc1	6.57573e-190	0.469479	0.388	0.001	1.63433e-185
Hes6	3.2348e-189	1.78552	0.957	0.273	8.03977e-185
Angpt2	4.94419e-189	0.511285	0.498	0.019	1.22883e-184
Dpysl4	1.35643e-185	0.512164	0.577	0.036	3.37128e-181
C1ql2	2.4569e-182	0.506205	0.388	0.003	6.10637e-178
Mycl	3.14975e-182	1.00888	0.833	0.143	7.82838e-178
Barx2	1.48912e-181	0.482558	0.53	0.027	3.70106e-177
Rasgef1a	6.45044e-181	0.341881	0.423	0.009	1.60319e-176
Cga	1.97418e-177	1.98876	0.448	0.013	4.90663e-173
Lmo1	1.66829e-168	0.556167	0.623	0.059	4.14636e-164
Chga	2.95405e-168	1.19345	0.73	0.106	7.34199e-164
Scg3	1.70201e-160	0.616849	0.63	0.067	4.23017e-156
Insm1	9.10289e-157	0.962157	0.879	0.202	2.26243e-152
Nrxn3	1.11117e-155	0.698822	0.491	0.033	2.76171e-151
Ccp110	9.17517e-155	1.0384	0.733	0.126	2.2804e-150
Dpysl5	5.56866e-153	0.581177	0.641	0.077	1.38403e-148
Atp1b1	1.18054e-148	-1.89048	0.452	0.974	2.93411e-144
Chd7	2.9064e-145	1.2429	0.968	0.441	7.22357e-141
Mia	4.06881e-145	-2.05327	0.53	0.988	1.01126e-140
S100a11	1.7306e-144	-1.50746	0.815	0.996	4.30123e-140
Rprm	2.04325e-142	0.922225	0.73	0.134	5.07829e-138
Ahnak	4.87906e-142	-1.71839	0.121	0.946	1.21264e-137
Megf11	3.76991e-140	0.485849	0.473	0.034	9.36973e-136
Col16a1	3.76495e-139	0.61098	0.416	0.023	9.35742e-135
Clu	8.70102e-139	-1.73017	0.117	0.93	2.16255e-134
S100a10	6.62673e-138	-1.64054	0.345	0.956	1.64701e-133
Elavl4	1.09607e-137	0.481872	0.431	0.026	2.72417e-133
Nol4	2.763e-137	0.51577	0.633	0.086	6.86715e-133
Ppp1r14b	7.09818e-135	1.02676	1	0.899	1.76418e-130
Rbpms	1.39685e-134	-1.35674	0.904	0.995	3.47173e-130
Wdr66	2.41057e-134	0.36393	0.399	0.02	5.99123e-130
Prox1	1.42409e-133	0.610851	0.63	0.09	3.53942e-129
Dusp5	3.00938e-132	-1.84017	0.32	0.933	7.47953e-128
Snap25	1.78559e-131	0.582578	0.601	0.077	4.43789e-127
Tex14	2.18217e-131	0.312608	0.302	0.005	5.42357e-127
App	1.29144e-129	-1.10814	0.886	0.994	3.20975e-125
Kcnk1	5.36908e-129	-1.47983	0.673	0.978	1.33443e-124
Tpm1	1.23022e-128	-1.50334	0.851	0.979	3.05758e-124
Dll3	8.41629e-127	0.278858	0.335	0.011	2.09178e-122
Mdm1	2.73965e-126	0.639817	0.644	0.106	6.80912e-122
Krt18	3.1991e-125	-1.73108	0.58	0.991	7.95105e-121
Phgdh	3.1946e-124	-1.28011	0.434	0.944	7.93985e-120
A930009A15Rik	2.08031e-123	0.25909	0.306	0.008	5.17041e-119
Mfng	9.43914e-123	0.360207	0.377	0.021	2.346e-118
Dcc	2.08058e-122	0.289349	0.359	0.017	5.17107e-118
Crmp1	9.87096e-122	0.339411	0.431	0.035	2.45333e-117
Aldh1a2	1.28852e-121	-1.5842	0.359	0.922	3.20249e-117
Klf6	2.20976e-121	-1.60731	0.523	0.962	5.49213e-117
Ezr	5.29908e-120	-1.29932	0.665	0.973	1.31703e-115
Kit	2.07928e-119	0.545878	0.651	0.115	5.16785e-115
Folr1	4.68799e-119	-1.15016	0.523	0.958	1.16515e-114
Plat	7.86412e-119	-1.27763	0.306	0.918	1.95455e-114
Stk33	9.36475e-118	0.354438	0.413	0.032	2.32751e-113
Espn	3.52259e-117	0.919349	0.861	0.285	8.75505e-113
Stk32a	2.70249e-116	0.403361	0.416	0.035	6.71678e-112
Nme1	4.64935e-116	0.910815	0.989	0.758	1.15555e-111
Anxa2	2.61598e-114	-1.34499	0.117	0.866	6.50176e-110
Dclk2	4.62377e-113	0.373649	0.488	0.056	1.14919e-108
Fth1	1.78293e-112	-0.709785	1	0.999	4.4313e-108
Cyr61	6.68263e-111	-1.97115	0.085	0.838	1.6609e-106
Stmn2	7.68603e-111	0.566801	0.367	0.025	1.91029e-106
Grp	1.17213e-110	0.352754	0.367	0.024	2.91322e-106
Enho	1.48319e-110	0.715898	0.762	0.19	3.68632e-106
Tm4sf1	1.59709e-110	-1.62005	0.011	0.81	3.9694e-106
Mdk	3.72349e-110	-1.30607	0.779	0.991	9.25437e-106
Mt1	1.7015e-109	-1.87707	0.651	0.966	4.22891e-105
Hes1	6.51919e-109	-1.91753	0.117	0.861	1.62028e-104
Gstm1	7.02505e-109	-1.34464	0.05	0.818	1.746e-104
Gdap1	1.90948e-108	0.411555	0.491	0.062	4.74582e-104
Pak3	2.62598e-108	0.801862	0.833	0.255	6.5266e-104
Vim	2.42071e-107	-1.47758	0.384	0.909	6.01644e-103
Ifitm3	6.78824e-107	-1.39896	0.868	0.988	1.68715e-102
Pgrmc1	2.18215e-106	-0.97717	0.566	0.937	5.42351e-102
Sdc4	4.6339e-106	-1.20436	0.256	0.887	1.15171e-101
Rpl34	2.66808e-105	0.505455	1	0.999	6.63124e-101
Gng2	1.00206e-104	0.577494	0.651	0.135	2.49052e-100
Dll1	2.4046e-103	0.373562	0.445	0.05	5.9764e-99
Cbfa2t3	2.72767e-102	0.351954	0.377	0.032	6.77936e-98
Tspan1	8.81252e-102	0.273475	0.363	0.028	2.19026e-97
Ly6h	1.06358e-101	-0.934793	0.947	0.994	2.64343e-97
Gse1	1.34954e-101	0.693519	0.79	0.251	3.35416e-97
Psap	5.55567e-98	-0.85535	0.79	0.964	1.38081e-93
Hmgcs2	6.5704e-97	-1.11358	0.057	0.787	1.63301e-92
Cx3cl1	2.40853e-96	-1.03826	0.053	0.771	5.98617e-92
Aldoc	4.66058e-96	-1.1714	0.448	0.905	1.15834e-91
Runx1t1	6.00576e-96	0.514018	0.434	0.055	1.49267e-91
Kazald1	7.97745e-96	-0.993841	0.16	0.808	1.98272e-91
Prdx2	2.04324e-94	0.533589	0.996	0.994	5.07828e-90
Tshz2	4.55032e-94	0.955177	0.943	0.601	1.13094e-89
Dctn6	1.68322e-93	-1.28212	0.58	0.899	4.18347e-89
Chchd10	8.18915e-93	-0.973237	0.762	0.943	2.03533e-88
Slc35d1	9.3135e-93	0.55508	0.658	0.156	2.31478e-88
Nfia	2.49118e-92	-0.814799	0.918	0.986	6.19158e-88
Bcam	2.73325e-92	-0.929278	0.125	0.783	6.79322e-88
Ece1	6.61201e-92	-0.931204	0.441	0.873	1.64335e-87
Sptbn1	7.4117e-92	-0.894206	0.911	0.978	1.8421e-87
Pcp4l1	9.65636e-92	-1.25119	0.057	0.749	2.39999e-87
Ppp2r2b	1.18363e-91	-1.02275	0.406	0.864	2.94179e-87
Ndufaf3	5.18597e-91	0.629462	0.769	0.249	1.28892e-86
Irs2	7.76688e-91	-1.14054	0.448	0.889	1.93038e-86
Syt4	3.60346e-90	0.583493	0.541	0.1	8.95604e-86
Nt5dc2	5.65549e-90	-0.969502	0.388	0.862	1.40561e-85
Cnn3	2.08183e-89	-0.862005	0.843	0.973	5.17417e-85
Rtraf	2.09296e-89	0.77404	0.993	0.952	5.20183e-85
Rpl3	2.20517e-89	0.441608	1	0.997	5.48074e-85
Bcl7a	3.83494e-89	0.652164	0.815	0.286	9.53136e-85
Tcf4	4.39114e-89	0.825214	0.993	0.922	1.09137e-84
Uchl1	9.20853e-89	0.833438	0.865	0.374	2.28869e-84
Tbc1d30	1.08444e-88	0.28975	0.427	0.054	2.69527e-84
Tagln2	1.19078e-88	-1.12709	0.117	0.772	2.95957e-84
St18	3.39691e-88	0.476911	0.31	0.024	8.44267e-84
Slc7a5	5.10665e-88	0.316154	0.363	0.037	1.26921e-83
Peg3	6.20387e-88	-1.29182	0.918	0.983	1.54191e-83
Fgfr1	3.19527e-87	-0.880309	0.235	0.818	7.94153e-83
Mgp	4.65418e-87	-1.59653	0.05	0.724	1.15675e-82
Nrcam	1.09842e-86	-0.982974	0.299	0.829	2.73002e-82
Fabp5	1.51824e-86	0.735683	0.826	0.313	3.77343e-82
Srrm4	2.02046e-86	0.420672	0.466	0.075	5.02166e-82
Myl12a	3.92461e-85	-0.777685	0.904	0.971	9.75422e-81
Hspa4l	4.50915e-85	0.825294	0.851	0.409	1.1207e-80
Gdpd1	2.71139e-84	0.488316	0.637	0.158	6.7389e-80
Zfp36	3.68628e-84	-1.07045	0.217	0.806	9.16189e-80
Npnt	3.98247e-84	-1.00869	0.384	0.865	9.89803e-80
Neurod1	5.50825e-84	1.32392	0.295	0.023	1.36902e-79
Rundc3a	6.92619e-84	0.363362	0.523	0.099	1.72144e-79
Atp1a1	3.48068e-83	-0.74414	0.833	0.959	8.65089e-79
Prrx1	4.05904e-83	-0.999886	0.217	0.792	1.00883e-78
Agr3	1.38955e-82	-0.903339	0.185	0.784	3.45358e-78
Ccdc80	1.71127e-82	-0.883664	0.125	0.761	4.25318e-78
Scpep1	8.10499e-82	-1.59677	0.199	0.757	2.01441e-77
Podxl2	1.08726e-81	0.689265	0.73	0.246	2.70228e-77
Tmem176b	1.42822e-81	-0.867137	0.879	0.971	3.54969e-77
Psip1	1.59201e-81	0.81357	0.979	0.787	3.95679e-77
Sparc	1.73638e-81	-1.05877	0.05	0.698	4.31559e-77
Ppib	3.29443e-81	-0.616926	0.982	0.99	8.18799e-77
Rbp1	4.55691e-81	-1.04684	0.256	0.833	1.13257e-76
Anxa5	4.76913e-81	-0.839293	0.701	0.916	1.18532e-76
Lrp11	1.85516e-80	0.288691	0.431	0.065	4.61082e-76
Gch1	2.91835e-80	0.617334	0.765	0.263	7.25328e-76
Nr4a3	2.98747e-80	-1.08337	0.662	0.952	7.42506e-76
F2rl1	3.30111e-80	-1.03742	0.053	0.699	8.20459e-76
Arhgdig	4.62941e-80	0.265089	0.345	0.037	1.15059e-75
Myl6	7.73984e-80	-0.600311	0.993	0.996	1.92366e-75
Nalcn	1.50554e-79	0.27967	0.416	0.061	3.74188e-75
Cnot6l	2.73538e-79	0.767421	0.911	0.56	6.79852e-75
Notch2	5.24504e-79	-0.896385	0.068	0.706	1.3036e-74
Col12a1	1.39189e-78	-0.971291	0.046	0.692	3.45939e-74
Kdm1a	4.03716e-77	0.670279	0.964	0.676	1.0034e-72
Csrp2	1.52212e-76	-0.962824	0.637	0.919	3.78308e-72
Myb	2.82387e-76	0.381657	0.384	0.054	7.01845e-72
Cd24a	3.11697e-76	-0.823001	0.754	0.973	7.74693e-72
Igfbp5	4.75365e-76	-1.16998	0.687	0.927	1.18147e-71
Smpdl3a	8.19322e-76	-0.775203	0.153	0.737	2.03634e-71
Cxcl12	4.12347e-75	-0.87497	0.05	0.673	1.02485e-70
Lgals3	1.78813e-74	-1.11701	0.028	0.657	4.44421e-70
Pbxip1	2.12136e-74	-0.832781	0.356	0.8	5.27243e-70
Elavl2	4.45303e-74	0.417096	0.559	0.133	1.10676e-69
Sdhaf1	1.48825e-73	0.440258	0.623	0.171	3.69889e-69
Ednrb	2.71007e-73	-1.23753	0.11	0.699	6.73561e-69
Laptm4a	2.93258e-73	-0.568049	0.979	0.986	7.28862e-69
Lamc1	7.78562e-73	-0.797047	0.338	0.789	1.93504e-68
Tmem176a	7.81306e-73	-0.910861	0.42	0.817	1.94186e-68
Jag2	5.02226e-72	0.259883	0.331	0.039	1.24823e-67
Mpzl2	1.84983e-71	-0.822535	0.025	0.643	4.59757e-67
Prr15l	6.58699e-71	0.312663	0.381	0.056	1.63713e-66
Sem1	8.09346e-71	0.494072	0.993	0.984	2.01155e-66
Rhoc	1.16554e-70	-0.758269	0.438	0.848	2.89684e-66
Stx18	1.39484e-70	-0.846767	0.541	0.848	3.46674e-66
Itm2c	1.71882e-70	-0.688605	0.658	0.909	4.27196e-66
Thbs1	1.97355e-70	-1.22592	0.189	0.753	4.90506e-66
9330159F19Rik	5.30823e-70	0.277826	0.391	0.061	1.31931e-65
Sez6l2	1.37363e-69	0.278181	0.402	0.064	3.41403e-65
F3	1.92171e-69	-1.16597	0.181	0.724	4.77621e-65
Cnrip1	4.30229e-69	0.271646	0.388	0.061	1.06929e-64
Hsp90ab1	4.83195e-69	0.310031	1	0.999	1.20093e-64
Stmn1	9.4678e-69	0.620712	0.996	0.873	2.35313e-64
Gpc3	1.80794e-68	-0.790446	0.096	0.665	4.49344e-64
Fcgrt	4.51884e-68	-0.65419	0.1	0.667	1.12311e-63
Gm266	5.50112e-68	-0.81439	0.224	0.744	1.36725e-63
Cdkn1c	6.23519e-68	1.01995	0.986	0.828	1.54969e-63
Slc6a6	6.6238e-68	0.559561	0.84	0.369	1.64628e-63
Tekt1	2.63314e-67	0.270141	0.445	0.084	6.5444e-63
Fas	4.94688e-67	-1.14263	0.057	0.643	1.2295e-62
Cenpv	7.33696e-67	0.411589	0.523	0.126	1.82353e-62
Actn4	7.43304e-67	-0.712315	0.665	0.894	1.84741e-62
Serpinh1	8.16414e-67	-0.703136	0.431	0.829	2.02912e-62
Aplp2	1.7554e-66	-0.653333	0.847	0.94	4.36287e-62
Gpc6	1.90223e-66	-0.7228	0.238	0.741	4.7278e-62
Glul	2.19145e-66	-0.781335	0.512	0.838	5.44662e-62
Prr7	3.33879e-66	-0.827258	0.32	0.754	8.29824e-62
Cd81	3.47501e-66	-0.578946	0.929	0.977	8.63679e-62
Amer2	4.48084e-66	0.322346	0.48	0.101	1.11367e-61
S100a16	8.73127e-66	-0.645918	0.068	0.659	2.17007e-61
Cd63	1.7056e-65	-0.550126	0.947	0.983	4.23911e-61
Oat	2.38451e-65	-0.77242	0.306	0.757	5.92645e-61
Rps11	6.9109e-65	0.332627	1	0.999	1.71764e-60
Shisa2	6.96665e-65	0.36099	0.47	0.1	1.73149e-60
Npm1	7.44059e-65	0.493626	0.986	0.99	1.84929e-60
Nfix	8.28161e-65	-0.612703	0.947	0.985	2.05831e-60
Errfi1	2.09384e-64	-1.04186	0.584	0.889	5.20402e-60
Krt8	3.35597e-64	-1.11657	0.804	0.951	8.34094e-60
Maff	3.95347e-64	-0.946956	0.206	0.728	9.82596e-60
Cd9	9.42137e-64	-0.612823	0.797	0.944	2.34159e-59
Mt2	1.14865e-63	-1.06886	0.573	0.887	2.85487e-59
Tubb5	1.45297e-63	0.437906	0.993	0.841	3.61121e-59
Csrp1	2.27677e-63	-0.813166	0.491	0.883	5.65867e-59
Chchd2	3.33888e-63	0.380293	1	0.995	8.29845e-59
Ech1	6.13695e-63	-0.668272	0.484	0.823	1.52528e-58
Tcim	7.1142e-63	-0.893432	0.206	0.739	1.76816e-58
Fam3c	8.79963e-63	-0.674684	0.431	0.789	2.18706e-58
Cpxm2	8.96201e-63	-0.739169	0.018	0.586	2.22742e-58
Mapk8ip2	1.83101e-62	0.263628	0.42	0.08	4.55079e-58
Ctdspl	2.66505e-62	-0.741171	0.089	0.636	6.62371e-58
Kcnc3	2.89698e-62	0.255478	0.367	0.061	7.20015e-58
Ppp5c	7.47447e-62	0.471982	0.73	0.289	1.8577e-57
Rasd1	9.79951e-62	0.429448	0.317	0.045	2.43557e-57
Fam129a	2.29801e-61	-0.715735	0.053	0.609	5.71148e-57
Gabrb3	4.67495e-61	0.288839	0.317	0.045	1.16191e-56
Cavin1	5.53463e-61	-0.726336	0.149	0.664	1.37558e-56
Cald1	7.23184e-61	-0.986515	0.708	0.924	1.7974e-56
Cd59a	9.90002e-61	-0.937815	0.292	0.739	2.46055e-56
Jun	1.5295e-60	-0.974686	0.836	0.969	3.80142e-56
Pkig	2.37353e-60	0.577544	0.836	0.458	5.89916e-56
Mest	5.48903e-60	-0.801394	0.861	0.974	1.36424e-55
Nbeal1	5.54628e-60	1.19202	0.872	0.609	1.37847e-55
Slc9a3r1	5.70042e-60	-0.67755	0.167	0.669	1.41678e-55
Cdh26	6.77116e-60	-0.720131	0.004	0.56	1.6829e-55
Fam183b	8.11198e-60	0.460464	0.512	0.132	2.01615e-55
9330182L06Rik	9.67147e-60	0.342393	0.395	0.078	2.40375e-55
Gnai2	1.73756e-59	-0.562362	0.858	0.951	4.31852e-55
Crym	2.02338e-59	-0.752255	0.085	0.623	5.0289e-55
Zeb2	3.14878e-59	0.763058	0.708	0.281	7.82598e-55
Cnn2	4.22724e-59	-0.765633	0.224	0.722	1.05064e-54
Fbn2	9.02398e-59	-0.6963	0.05	0.586	2.24282e-54
Dnajc3	9.13609e-59	-0.700302	0.48	0.805	2.27068e-54
Rprd1a	1.12416e-58	0.576772	0.754	0.364	2.794e-54
Naca	1.97612e-58	0.340453	1	0.995	4.91144e-54
Scg2	2.74134e-58	0.330357	0.498	0.125	6.81333e-54
H2afy	6.19132e-58	0.470602	0.975	0.873	1.53879e-53
Lurap1l	6.55761e-58	0.292394	0.413	0.086	1.62983e-53
Eipr1	9.39178e-58	0.256949	0.423	0.088	2.33423e-53
Ckb	1.14762e-57	0.819423	0.897	0.538	2.8523e-53
Tpm4	1.20391e-57	-0.657611	0.836	0.957	2.99221e-53
Ccnd3	1.36083e-57	-0.676303	0.345	0.758	3.38221e-53
Prmt1	1.68517e-57	0.498212	0.979	0.808	4.18833e-53
Nfasc	2.00521e-57	0.392267	0.502	0.13	4.98374e-53
Cryab	2.28843e-57	-0.838963	0.267	0.723	5.68767e-53
Rgs17	3.90887e-57	0.379521	0.48	0.121	9.71511e-53
Celf3	5.435e-57	0.260694	0.327	0.053	1.35081e-52
Rest	1.17799e-56	-0.61971	0.082	0.604	2.92777e-52
Lhfpl1	1.21831e-56	-0.625314	0.011	0.545	3.02799e-52
Sox4	2.45204e-56	0.637493	0.996	0.948	6.09431e-52
Itm2b	2.95434e-56	-0.47225	0.993	0.998	7.34273e-52
Smarcc1	3.45314e-56	0.565492	0.943	0.679	8.58243e-52
Lmna	3.53368e-56	-0.87497	0.463	0.793	8.7826e-52
Snrpf	3.9336e-56	0.434731	0.996	0.955	9.77657e-52
Lgmn	7.31206e-56	-0.615899	0.228	0.677	1.81734e-51
Zfp36l2	1.04893e-55	-0.983864	0.363	0.746	2.60702e-51
Man1c1	1.86827e-55	0.264225	0.473	0.111	4.64339e-51
Idh2	2.36645e-55	-0.633846	0.434	0.783	5.88157e-51
Dapp1	3.34444e-55	0.475732	0.715	0.296	8.31226e-51
Slc16a2	3.9662e-55	-0.613864	0.705	0.902	9.85759e-51
Vgll4	5.22027e-55	-0.647078	0.306	0.726	1.29744e-50
Cebpb	1.29038e-54	-0.77274	0.416	0.789	3.20711e-50
Dynll1	1.76557e-54	-0.585115	0.961	0.987	4.38814e-50
Wwtr1	2.86683e-54	-0.674765	0.114	0.611	7.12522e-50
Fzd4	2.90112e-54	-0.75786	0.192	0.667	7.21045e-50
Pclo	3.55085e-54	0.606467	0.715	0.301	8.82529e-50
Tceal9	1.09926e-53	-0.466337	0.989	0.994	2.7321e-49
Nptx2	1.77165e-53	0.364966	0.491	0.13	4.40327e-49
Cct7	1.8185e-53	0.478612	0.986	0.803	4.51969e-49
Ly6e	2.46212e-53	-0.712281	0.922	0.972	6.11934e-49
Trip6	2.65712e-53	-0.562647	0.1	0.593	6.604e-49
Nfkbia	3.23236e-53	-0.901771	0.612	0.857	8.0337e-49
Phip	7.04304e-53	0.607599	0.929	0.657	1.75048e-48
Ptprf	7.45387e-53	-0.593294	0.612	0.848	1.85258e-48
Snx30	1.39823e-52	0.251939	0.374	0.076	3.47517e-48
Efnb2	1.66965e-52	-0.65512	0.32	0.745	4.14975e-48
Klf5	1.84495e-52	-0.800088	0.388	0.789	4.58543e-48
Camk2d	3.38603e-52	-0.634098	0.367	0.737	8.41563e-48
Gng5	3.99514e-52	-0.421396	0.986	0.995	9.92952e-48
Junb	7.38148e-52	-1.15007	0.612	0.856	1.83459e-47
Fmo1	7.6881e-52	-0.589889	0.018	0.521	1.9108e-47
Ldha	2.91596e-51	-0.629012	0.559	0.845	7.24734e-47
Dach1	4.09237e-51	0.418819	0.498	0.144	1.01712e-46
Snrpe	1.81833e-50	0.397887	0.993	0.959	4.51928e-46
Pde5a	2.36517e-50	-0.672299	0.199	0.636	5.87839e-46
Ak3	2.48654e-50	-0.602738	0.256	0.664	6.18004e-46
Purb	5.88768e-50	-0.495412	0.954	0.974	1.46332e-45
Lsamp	7.35633e-50	0.250384	0.285	0.043	1.82834e-45
Rpl10a	1.02671e-49	0.301116	1	0.999	2.55179e-45
Scg5	1.07722e-49	0.466133	0.89	0.496	2.67732e-45
Cct2	1.26453e-49	0.472666	0.968	0.866	3.14287e-45
Soga3	1.77231e-49	0.315322	0.537	0.165	4.40489e-45
Neat1	1.96314e-49	-1.09192	0.164	0.613	4.87918e-45
Hint1	2.40548e-49	0.40667	0.986	0.931	5.97858e-45
Mbnl2	3.07145e-49	-0.576499	0.609	0.858	7.63379e-45
Meg3	3.75982e-49	0.95488	0.996	0.984	9.34466e-45
Pitx2	4.01393e-49	0.592463	0.964	0.823	9.97623e-45
Atp2b4	4.33407e-49	-0.626191	0.278	0.701	1.07719e-44
Acot1	4.89841e-49	-0.682106	0.63	0.867	1.21745e-44
Nfib	6.02832e-49	-0.535416	0.918	0.971	1.49828e-44
Ncam1	1.00462e-48	-0.689248	0.416	0.756	2.49688e-44
Eif4g2	1.1041e-48	0.407225	0.993	0.954	2.74413e-44
Timp2	1.46542e-48	-0.557264	0.367	0.72	3.64216e-44
Xpot	1.60687e-48	0.336324	0.523	0.161	3.99371e-44
Ndrg2	1.72235e-48	-0.580161	0.356	0.733	4.28073e-44
Pnmal2	2.11962e-48	0.419897	0.552	0.184	5.2681e-44
Aebp2	2.55826e-48	-0.626928	0.601	0.823	6.3583e-44
Fnbp1l	3.14202e-48	-0.564176	0.94	0.966	7.80918e-44
Tox3	3.36505e-48	0.560541	0.786	0.432	8.36349e-44
Celf4	6.46714e-48	0.485676	0.762	0.358	1.60734e-43
Serf1	1.13141e-47	0.469311	0.929	0.645	2.81201e-43
Gapdh	1.14047e-47	-0.440336	0.989	0.99	2.83452e-43
Fstl1	1.14312e-47	-0.588555	0.267	0.676	2.84112e-43
Zbtb18	1.2435e-47	0.338226	0.548	0.182	3.09059e-43
Cartpt	1.25817e-47	0.332639	0.292	0.05	3.12705e-43
Scx	2.10297e-47	0.358344	0.367	0.083	5.22673e-43
Ikzf2	2.13271e-47	-0.582792	0.167	0.604	5.30063e-43
Plekho1	2.1526e-47	0.311612	0.544	0.169	5.35006e-43
Ctsl	2.21433e-47	-0.562502	0.854	0.925	5.5035e-43
Tspan12	2.26834e-47	-0.571322	0.27	0.691	5.63774e-43
Frmd4b	2.91253e-47	-0.589312	0.114	0.574	7.23881e-43
Eef1b2	3.0389e-47	0.332355	1	0.996	7.55289e-43
Hspb1	4.42155e-47	-0.59099	0.146	0.612	1.09893e-42
Gstm2	4.68325e-47	-0.572379	0.011	0.481	1.16398e-42
Amotl1	4.71696e-47	-0.591845	0.274	0.678	1.17235e-42
Spats2l	4.94388e-47	-0.528133	0.043	0.522	1.22875e-42
Gsta4	5.02169e-47	-0.560215	0.089	0.557	1.24809e-42
Cpe	5.16244e-47	0.619232	0.932	0.645	1.28307e-42
Tuba1a	5.46237e-47	0.655542	0.989	0.923	1.35762e-42
Bst2	6.54548e-47	-0.663402	0.004	0.475	1.62681e-42
Sfxn1	8.05033e-47	0.43928	0.765	0.377	2.00083e-42
Fbln2	1.22402e-46	-0.660996	0.021	0.491	3.04217e-42
Rpl36	2.34405e-46	0.268649	1	0.999	5.8259e-42
Rmst	3.01139e-46	0.631729	0.786	0.444	7.48451e-42
Mmp15	3.59901e-46	-0.544196	0.093	0.551	8.94498e-42
Rfx4	4.32915e-46	-0.639375	0.537	0.816	1.07597e-41
1110065P20Rik	1.43277e-45	0.416051	0.794	0.414	3.561e-41
Epb41l2	2.53471e-45	-0.45092	0.281	0.675	6.29977e-41
Wrap73	3.12782e-45	0.300174	0.512	0.163	7.77389e-41
Caprin1	3.42641e-45	0.496768	0.925	0.69	8.51599e-41
Atf3	4.25874e-45	-1.10784	0.438	0.793	1.05847e-40
Grin2a	4.50963e-45	-0.558515	0.214	0.672	1.12082e-40
Gpx8	7.95262e-45	-0.499079	0.132	0.566	1.97654e-40
1110008P14Rik	8.41693e-45	0.348994	0.673	0.278	2.09195e-40
Mgst1	9.66483e-45	-0.550815	0.381	0.747	2.4021e-40
Anxa3	1.13598e-44	-0.558842	0	0.455	2.82336e-40
Col4a1	1.40447e-44	-0.58499	0.47	0.772	3.49067e-40
Apoe	1.41978e-44	-0.625114	0.103	0.544	3.52872e-40
Emp1	1.63033e-44	-0.641602	0.007	0.46	4.05202e-40
Islr	1.76304e-44	-0.497223	0.011	0.464	4.38186e-40
Hspa5	2.86738e-44	-0.493454	0.957	0.975	7.12659e-40
Filip1	3.51658e-44	-0.527962	0.057	0.512	8.7401e-40
Nkain3	3.9396e-44	-0.597101	0.135	0.572	9.79148e-40
Dpysl3	4.23482e-44	0.396155	0.758	0.352	1.05252e-39
Tubb2a	1.00062e-43	-0.737139	0.555	0.823	2.48694e-39
Tcf7l1	1.32311e-43	-0.458712	0.036	0.49	3.28846e-39
Arc	1.82338e-43	-0.804822	0.495	0.795	4.53184e-39
Ext1	2.32216e-43	-0.572443	0.299	0.665	5.7715e-39
Elmo1	3.03026e-43	0.259049	0.452	0.128	7.5314e-39
Gpx1	6.59086e-43	-0.596837	0.544	0.777	1.63809e-38
Rhou	8.67075e-43	-0.701146	0.466	0.76	2.15503e-38
Pdpn	1.11058e-42	-0.496955	0.039	0.479	2.76024e-38
Pdap1	1.11305e-42	0.412604	0.986	0.879	2.76636e-38
Srp14	1.31984e-42	0.410588	0.964	0.756	3.28032e-38
Ier5	1.43253e-42	-0.617412	0.228	0.619	3.5604e-38
Tagln	1.46439e-42	-1.26352	0.078	0.531	3.63961e-38
Il10rb	1.47422e-42	-0.477016	0.082	0.515	3.66403e-38
Pomgnt1	1.64198e-42	0.271271	0.491	0.156	4.08098e-38
Nap1l1	1.95867e-42	0.400991	0.989	0.904	4.86808e-38
Pcdh7	2.2606e-42	-0.567794	0.313	0.702	5.61848e-38
Klf4	2.54618e-42	-0.792643	0.26	0.676	6.32827e-38
St3gal5	2.67483e-42	0.444637	0.715	0.354	6.64803e-38
Dscam	2.69606e-42	-0.583361	0.246	0.62	6.70078e-38
Serf2	3.07871e-42	-0.384051	0.989	0.99	7.65183e-38
Acaa2	3.64292e-42	-0.512076	0.399	0.739	9.05411e-38
Cxadr	3.74074e-42	-0.558909	0.498	0.762	9.29723e-38
Rab27a	3.93109e-42	0.287195	0.427	0.121	9.77033e-38
Tmbim6	4.51945e-42	-0.438481	0.907	0.94	1.12326e-37
Ebf1	5.68404e-42	0.385371	0.306	0.062	1.41271e-37
H2-K1	6.22007e-42	-0.658077	0.274	0.653	1.54594e-37
Calml4	9.86319e-42	0.474634	0.737	0.343	2.4514e-37
Mcl1	1.20066e-41	-0.582651	0.737	0.86	2.98412e-37
Bsg	1.38915e-41	-0.401182	0.986	0.985	3.45259e-37
Lmod1	1.74495e-41	-0.6855	0.043	0.474	4.33691e-37
Rpl12	2.52011e-41	0.272749	1	1	6.26349e-37
Plce1	2.89665e-41	-0.481949	0.046	0.475	7.19934e-37
Nfil3	3.70882e-41	-0.574245	0.06	0.487	9.2179e-37
Eif4a1	3.76561e-41	0.343493	1	0.979	9.35903e-37
Pik3r1	4.96438e-41	0.552063	0.907	0.649	1.23385e-36
Mien1	5.32377e-41	0.399957	0.808	0.454	1.32317e-36
Fosb	6.58732e-41	-0.821227	0.534	0.8	1.63721e-36
2009-09-01	7.45312e-41	-0.499292	0.431	0.737	1.8524e-36
Msi2	9.13787e-41	0.419099	0.979	0.867	2.27113e-36
Hacd4	1.5901e-40	-0.480522	0.039	0.468	3.95203e-36
Cct5	1.68028e-40	0.359697	0.979	0.89	4.17618e-36
Cavin3	1.79703e-40	-0.519135	0.125	0.533	4.46634e-36
Cct3	1.9513e-40	0.422297	0.95	0.779	4.84977e-36
Zim1	1.97044e-40	-0.645623	0.096	0.512	4.89734e-36
Rcan1	2.48387e-40	-0.591571	0.075	0.49	6.17342e-36
Slc1a3	2.65859e-40	-0.547976	0.078	0.505	6.60766e-36
Zfp292	3.02137e-40	0.48262	0.879	0.618	7.50931e-36
Cct8	5.1027e-40	0.380216	0.95	0.794	1.26822e-35
Sox11	5.46002e-40	0.622899	0.943	0.786	1.35703e-35
Fubp1	8.96868e-40	0.402817	0.968	0.85	2.22908e-35
Eya4	1.07946e-39	-0.539226	0.367	0.697	2.68289e-35
Capns1	1.38553e-39	-0.451372	0.715	0.827	3.4436e-35
Kcnh8	2.19455e-39	0.280484	0.577	0.212	5.45432e-35
Farsa	2.7325e-39	0.350716	0.687	0.318	6.79136e-35
Psen2	2.81548e-39	0.42748	0.705	0.34	6.99758e-35
Prnp	4.27807e-39	-0.564426	0.438	0.734	1.06327e-34
Pim1	4.33448e-39	-0.676115	0.288	0.647	1.07729e-34
H2-D1	5.35295e-39	-0.583175	0.363	0.682	1.33042e-34
Spry1	7.48822e-39	-0.722345	0.238	0.623	1.86112e-34
Selenof	8.72499e-39	-0.394813	0.95	0.965	2.16851e-34
Hey1	8.7781e-39	-0.756177	0.253	0.636	2.18171e-34
Rpl27	9.65661e-39	0.271083	1	0.994	2.40005e-34
Jund	1.48364e-38	-0.423991	0.989	0.995	3.68744e-34
Mrpl1	1.54335e-38	0.308511	0.598	0.244	3.83584e-34
Tsc22d1	1.56761e-38	-0.54682	0.95	0.987	3.89613e-34
Cbfa2t2	1.86278e-38	0.26225	0.448	0.141	4.62976e-34
Gja1	2.70027e-38	-0.559235	0.093	0.489	6.71125e-34
Gadd45g	2.77744e-38	0.400008	0.851	0.452	6.90305e-34
Lamc2	3.10929e-38	-0.466847	0.071	0.473	7.72783e-34
Fras1	3.79878e-38	0.459443	0.765	0.419	9.44149e-34
Fam214a	3.91492e-38	0.352814	0.658	0.293	9.73014e-34
Sms	4.20223e-38	0.384149	0.754	0.399	1.04442e-33
Ltbp3	4.91137e-38	-0.459576	0.228	0.607	1.22067e-33
Clic1	5.70373e-38	-0.561712	0.801	0.877	1.41761e-33
Fam8a1	8.92948e-38	0.388653	0.584	0.254	2.21933e-33
Tmod3	1.78815e-37	0.414087	0.712	0.374	4.44426e-33
Fbxo32	1.96515e-37	0.607004	0.79	0.463	4.88418e-33
Malt1	2.78297e-37	0.269412	0.381	0.108	6.9168e-33
Timp3	2.98364e-37	-0.600349	0.295	0.673	7.41553e-33
Sntb2	3.76604e-37	-0.559337	0.199	0.567	9.36012e-33
Egr1	3.77403e-37	-1.23579	0.537	0.786	9.37998e-33
Hnrnpa1	3.86812e-37	0.320206	1	0.989	9.61382e-33
Cdk4	3.92823e-37	0.380253	0.972	0.895	9.76322e-33
Pebp1	4.23886e-37	0.314061	0.993	0.982	1.05353e-32
Bcl2l1	5.11894e-37	0.329662	0.662	0.298	1.27226e-32
Rsl1d1	5.22263e-37	0.387998	0.907	0.663	1.29803e-32
Ifrd1	6.07939e-37	-0.696422	0.669	0.836	1.51097e-32
Rufy3	6.42484e-37	0.25516	0.509	0.18	1.59683e-32
Psmc5	9.30433e-37	0.378819	0.854	0.529	2.3125e-32
Tnfrsf12a	1.00323e-36	-0.761364	0.47	0.755	2.49343e-32
Psmb5	1.48374e-36	0.362412	0.954	0.783	3.68768e-32
Itgb1	1.70265e-36	-0.439822	0.893	0.93	4.23176e-32
Snhg6	3.24568e-36	0.427689	0.801	0.517	8.06682e-32
Serbp1	3.57889e-36	0.319717	0.993	0.979	8.89498e-32
Rpl22l1	3.60303e-36	-0.365199	0.996	0.996	8.95498e-32
Col4a2	3.75055e-36	-0.456455	0.192	0.55	9.32162e-32
Mbd2	4.12122e-36	0.422575	0.9	0.65	1.02429e-31
Ssb	5.0706e-36	0.353858	0.975	0.891	1.26025e-31
Ran	5.80908e-36	0.363316	0.993	0.893	1.44379e-31
Dnajb6	6.27391e-36	0.364358	0.961	0.806	1.55932e-31
Dapl1	6.9345e-36	-0.52057	0.036	0.431	1.7235e-31
Fam60a	7.02789e-36	0.445096	0.94	0.707	1.74671e-31
Mme	7.44812e-36	-0.563911	0.004	0.391	1.85116e-31
Tspyl4	7.95882e-36	0.312062	0.53	0.204	1.97808e-31
Add3	8.66519e-36	-0.500785	0.31	0.662	2.15365e-31
Lgals3bp	1.06784e-35	-0.447173	0.075	0.46	2.65402e-31
Rims2	1.0996e-35	0.354848	0.552	0.232	2.73295e-31
Dlk1	1.33367e-35	-1.50055	0.762	0.819	3.31471e-31
Timm13	1.36617e-35	0.343264	0.968	0.798	3.39549e-31
Ccnd1	1.43836e-35	-0.746341	0.317	0.654	3.57491e-31
Aldh2	1.63159e-35	-0.492229	0.338	0.669	4.05515e-31
Myl9	1.78339e-35	-0.608941	0.278	0.635	4.43243e-31
Epas1	1.948e-35	-0.494644	0.014	0.398	4.84155e-31
Romo1	1.94938e-35	0.355802	1	0.882	4.845e-31
B2m	2.08828e-35	-0.531876	0.235	0.589	5.1902e-31
Cxxc4	2.1599e-35	0.372705	0.52	0.199	5.36821e-31
Dcx	2.3538e-35	0.34122	0.562	0.218	5.85014e-31
Tma16	2.53216e-35	0.349517	0.63	0.286	6.29343e-31
Ostf1	3.70435e-35	-0.448741	0.178	0.54	9.20678e-31
Ost4	4.02542e-35	-0.40935	0.847	0.917	1.00048e-30
Mrps5	4.68946e-35	0.385294	0.854	0.541	1.16552e-30
Ncoa1	4.72087e-35	0.358467	0.786	0.437	1.17333e-30
Eef1g	4.93767e-35	0.307145	0.989	0.986	1.22721e-30
Prrx2	5.17223e-35	-0.441409	0.039	0.425	1.2855e-30
Top1	5.21877e-35	0.365991	0.989	0.934	1.29707e-30
Apex1	5.7977e-35	0.376553	0.786	0.445	1.44096e-30
Foxn3	6.22258e-35	-0.475414	0.541	0.776	1.54656e-30
Kcnab1	7.77668e-35	-0.405529	0.018	0.4	1.93282e-30
Cd82	8.27122e-35	-0.425128	0.149	0.528	2.05573e-30
Grasp	8.83378e-35	0.332097	0.544	0.21	2.19555e-30
Hdac2	8.98032e-35	0.376575	0.858	0.572	2.23197e-30
1700025G04Rik	9.48971e-35	-0.453471	0.238	0.585	2.35857e-30
Lamp1	9.69632e-35	-0.402188	0.872	0.917	2.40992e-30
Hs3st1	1.05956e-34	-0.503194	0.117	0.502	2.63344e-30
Tuba4a	1.16018e-34	0.424953	0.633	0.296	2.88352e-30
Eif3a	1.18227e-34	0.413697	0.972	0.889	2.93842e-30
Dnajc11	1.62716e-34	0.266076	0.534	0.206	4.04414e-30
Slc24a5	1.84545e-34	0.32249	0.69	0.33	4.58669e-30
Thra	1.88572e-34	-0.437883	0.47	0.73	4.68677e-30
Isl1	1.90264e-34	0.735288	0.683	0.384	4.72883e-30
Pik3r3	2.39991e-34	0.264143	0.391	0.117	5.96474e-30
Rpl13a	2.50916e-34	0.367367	0.972	0.864	6.23626e-30
Nudcd2	2.67621e-34	0.308706	0.676	0.328	6.65145e-30
Nr4a1	3.14045e-34	-0.86595	0.708	0.853	7.80527e-30
Cd47	3.94012e-34	-0.475658	0.555	0.78	9.79278e-30
S100a1	4.02473e-34	-0.419112	0.238	0.61	1.00031e-29
Sox2	4.16358e-34	-0.662929	0.865	0.926	1.03482e-29
Mxi1	4.19691e-34	0.453734	0.733	0.42	1.0431e-29
Rasl11a	4.23875e-34	-0.560224	0.014	0.389	1.0535e-29
Nxn	5.09129e-34	-0.44077	0.359	0.693	1.26539e-29
Tmem131	5.33068e-34	0.292591	0.594	0.251	1.32489e-29
Grn	7.08547e-34	-0.390212	0.206	0.568	1.76102e-29
Cdc42ep5	7.28967e-34	-0.440468	0.082	0.462	1.81178e-29
Nbea	8.35852e-34	0.388876	0.705	0.379	2.07743e-29
Stx7	8.52136e-34	0.295257	0.626	0.282	2.1179e-29
Dpysl2	9.15899e-34	0.399654	0.801	0.472	2.27637e-29
Sdc2	9.72223e-34	-0.430849	0.285	0.611	2.41636e-29
Ifi27	1.05511e-33	-0.551586	0.705	0.81	2.62238e-29
Cyb5a	1.21785e-33	-0.39891	0.815	0.943	3.02685e-29
Tia1	1.27014e-33	0.385694	0.872	0.626	3.15682e-29
2003-09-01	1.30562e-33	0.318766	0.601	0.256	3.24499e-29
Hspd1	1.31757e-33	0.391431	0.972	0.843	3.27469e-29
Slit2	1.49358e-33	-0.494278	0.363	0.657	3.71214e-29
Six1	2.11087e-33	0.434419	0.95	0.795	5.24635e-29
Cep170	2.52488e-33	0.273084	0.502	0.194	6.27535e-29
Ramp1	3.15031e-33	-0.481059	0.06	0.431	7.82977e-29
Myh9	3.76628e-33	-0.492797	0.573	0.8	9.3607e-29
Dlc1	4.03897e-33	-0.439079	0.068	0.439	1.00385e-28
Klhdc2	4.15824e-33	0.358527	0.911	0.677	1.03349e-28
Gabrg3	4.3137e-33	-0.413916	0.039	0.406	1.07213e-28
Camk1	4.52409e-33	-0.409508	0.189	0.542	1.12442e-28
Ranbp1	5.5543e-33	0.34248	0.982	0.845	1.38047e-28
Rhov	9.48866e-33	-0.476439	0.014	0.377	2.35831e-28
Satb1	1.02952e-32	0.253296	0.537	0.211	2.55876e-28
Slc27a2	1.04423e-32	0.342541	0.63	0.295	2.59534e-28
Palld	1.1181e-32	-0.631385	0.11	0.479	2.77893e-28
Fip1l1	1.2568e-32	0.413989	0.808	0.49	3.12366e-28
Mpp6	1.27721e-32	-0.533552	0.527	0.725	3.17439e-28
Endod1	1.47199e-32	-0.425523	0.064	0.431	3.65847e-28
S100a6	1.97601e-32	-0.793328	0.217	0.557	4.91117e-28
Gm26735	2.05112e-32	0.402139	0.769	0.429	5.09786e-28
Hnrnpm	2.87624e-32	0.385924	0.954	0.843	7.1486e-28
Jpt1	2.92175e-32	0.320874	0.964	0.803	7.26173e-28
Abhd17b	2.93211e-32	0.322512	0.715	0.375	7.28747e-28
Hmgb2	2.96103e-32	-0.89594	0.875	0.894	7.35934e-28
Mex3a	4.29516e-32	0.389686	0.829	0.535	1.06752e-27
Rpp21	4.99731e-32	0.376327	0.705	0.384	1.24203e-27
Cox7c	5.4233e-32	0.254219	1	0.993	1.34791e-27
Mprip	6.30698e-32	-0.431619	0.641	0.817	1.56754e-27
Hspb8	6.7835e-32	-0.453449	0.018	0.374	1.68597e-27
Myef2	7.70661e-32	0.388152	0.779	0.475	1.9154e-27
Ppp1r15a	8.48337e-32	-0.599592	0.359	0.655	2.10846e-27
Rgs2	1.09013e-31	-0.592753	0.605	0.862	2.70941e-27
Psma7	1.18587e-31	0.30473	0.989	0.938	2.94736e-27
Ddx5	1.6068e-31	0.28345	1	0.994	3.99354e-27
Fxyd1	1.69248e-31	-0.381823	0.025	0.384	4.2065e-27
Fkbp10	1.80952e-31	-0.339152	0.082	0.443	4.49739e-27
Lncpint	1.89852e-31	-0.428306	0.064	0.422	4.71857e-27
Rbm47	1.92041e-31	-0.44323	0.217	0.567	4.77298e-27
Yap1	1.92921e-31	-0.372851	0.089	0.448	4.79486e-27
Il6st	2.08059e-31	-0.428842	0.281	0.579	5.17111e-27
Rbms1	2.21743e-31	-0.457247	0.42	0.689	5.51119e-27
Cdk2ap1	2.28493e-31	0.363768	0.907	0.681	5.67897e-27
Erbb4	2.31874e-31	-0.406005	0.11	0.465	5.76301e-27
Acot7	2.42744e-31	-0.421818	0.274	0.597	6.03315e-27
Ntng1	2.507e-31	-0.450565	0.014	0.364	6.2309e-27
Anxa6	2.58656e-31	-0.427921	0.31	0.625	6.42863e-27
Tbca	3.13686e-31	0.322849	0.996	0.944	7.79636e-27
Nrp2	3.71e-31	-0.494174	0.078	0.426	9.22083e-27
Mrpl57	4.99339e-31	0.327038	0.715	0.389	1.24106e-26
Gstt1	5.05584e-31	-0.388315	0.057	0.414	1.25658e-26
Kmt2b	5.06508e-31	0.278804	0.605	0.274	1.25887e-26
Mettl7a1	5.62409e-31	-0.496215	0.167	0.509	1.39781e-26
Polr2g	7.31494e-31	0.34015	0.73	0.424	1.81806e-26
Kcnh1	7.3422e-31	-0.397812	0.032	0.386	1.82483e-26
Nid2	9.06578e-31	-0.346381	0.011	0.356	2.25321e-26
Mtfr1l	1.06626e-30	0.312531	0.73	0.401	2.65008e-26
Cers4	1.07972e-30	-0.454949	0.356	0.637	2.68353e-26
Rap2b	1.42119e-30	0.275567	0.477	0.183	3.53221e-26
Crip1	1.4889e-30	-0.559863	0.288	0.592	3.7005e-26
Pla2g16	1.52889e-30	-0.40785	0.267	0.583	3.79991e-26
Smarca4	1.63029e-30	0.336518	0.776	0.462	4.05191e-26
Nectin1	1.67317e-30	0.271834	0.612	0.275	4.1585e-26
Acta2	2.06032e-30	-1.36033	0.085	0.444	5.12073e-26
Kif5c	2.16734e-30	0.294967	0.466	0.182	5.38672e-26
Tsn	2.17903e-30	0.356742	0.964	0.839	5.41576e-26
Cbx3	2.34523e-30	0.369668	0.972	0.905	5.82883e-26
Sec11a	2.64766e-30	-0.363066	0.897	0.92	6.58049e-26
Smchd1	2.66225e-30	-0.542914	0.73	0.843	6.61675e-26
Skp1a	3.51886e-30	-0.410478	0.954	0.979	8.74577e-26
Aldoa	3.67438e-30	-0.485427	0.822	0.894	9.1323e-26
Eno1	3.90449e-30	-0.437838	0.498	0.721	9.70423e-26
Cldn4	4.61398e-30	-0.67853	0.153	0.491	1.14676e-25
Gde1	5.15384e-30	0.423001	0.826	0.605	1.28094e-25
Ica1	5.27521e-30	0.266545	0.555	0.238	1.3111e-25
Smad7	5.33226e-30	-0.429575	0.217	0.559	1.32528e-25
Ctnna1	5.92671e-30	-0.399118	0.833	0.906	1.47303e-25
Edn2	6.07993e-30	-0.851816	0.217	0.581	1.5111e-25
Set	6.39699e-30	0.30783	0.986	0.957	1.58991e-25
Kctd10	6.75436e-30	-0.428926	0.185	0.523	1.67873e-25
Bola2	6.76226e-30	0.354837	0.865	0.619	1.68069e-25
Mrps33	7.55742e-30	0.337523	0.936	0.775	1.87832e-25
Nono	8.29174e-30	0.338862	0.957	0.782	2.06083e-25
Wwc2	9.61873e-30	-0.405351	0.181	0.524	2.39064e-25
Arhgap5	1.03807e-29	-0.4333	0.772	0.84	2.58002e-25
Mgll	1.06134e-29	-0.516631	0.043	0.384	2.63786e-25
Ctsb	1.21932e-29	-0.41018	0.641	0.791	3.03049e-25
Tmem132c	1.47197e-29	-0.365362	0.014	0.354	3.65844e-25
Igfbp2	2.09738e-29	-0.555567	0.751	0.868	5.21283e-25
Uqcc2	2.18784e-29	0.318589	0.936	0.687	5.43767e-25
Cdk6	2.54067e-29	-0.479657	0.302	0.617	6.31458e-25
Sri	2.74978e-29	-0.40815	0.52	0.742	6.8343e-25
Tcp1	2.86056e-29	0.318079	0.968	0.807	7.10964e-25
Ctsz	2.95123e-29	-0.405131	0.616	0.805	7.33499e-25
2300009A05Rik	3.01467e-29	0.302508	0.733	0.394	7.49266e-25
Stox2	3.13774e-29	-0.474554	0.552	0.747	7.79855e-25
Tuba1b	4.33542e-29	-0.666871	0.918	0.923	1.07753e-24
Sox9	5.75763e-29	-0.551502	0.192	0.525	1.431e-24
Avpi1	5.78098e-29	-0.512907	0.221	0.545	1.43681e-24
Ttyh1	6.45701e-29	-0.347673	0.046	0.379	1.60482e-24
Tceal3	8.92532e-29	-0.43659	0.278	0.588	2.2183e-24
Csrnp1	9.26115e-29	-0.456841	0.157	0.49	2.30177e-24
Syap1	9.82635e-29	-0.4228	0.459	0.68	2.44224e-24
Tmem57	1.12351e-28	0.31183	0.722	0.392	2.79237e-24
Card19	1.21481e-28	-0.413638	0.235	0.548	3.0193e-24
Gcnt2	1.64549e-28	-0.429461	0.139	0.465	4.08971e-24
Pvr	1.8946e-28	-0.405966	0.228	0.551	4.70884e-24
Hpcal1	3.00555e-28	0.333238	0.619	0.316	7.47e-24
Alkbh1	4.25103e-28	0.302423	0.79	0.461	1.05655e-23
Ski	5.24261e-28	-0.423346	0.459	0.682	1.303e-23
Lypd2	5.29479e-28	-0.393133	0.004	0.323	1.31597e-23
Sptan1	6.00189e-28	-0.428941	0.569	0.732	1.49171e-23
Hnrnpab	6.37609e-28	0.295202	0.996	0.942	1.58471e-23
Lgals9	6.51501e-28	-0.420896	0.05	0.39	1.61924e-23
Bhlhe40	7.21447e-28	-0.436663	0.053	0.382	1.79308e-23
Map2	7.80776e-28	0.42163	0.836	0.581	1.94054e-23
Ephx1	7.95909e-28	-0.315925	0.014	0.336	1.97815e-23
Atxn7l3b	8.07382e-28	0.28129	0.979	0.972	2.00667e-23
Calu	8.12149e-28	-0.42049	0.491	0.702	2.01851e-23
Klk8	8.60239e-28	-0.391353	0.21	0.53	2.13804e-23
Rragd	8.83282e-28	-0.459855	0.63	0.783	2.19531e-23
Atad2b	9.54706e-28	0.325027	0.651	0.345	2.37283e-23
Nell2	1.12415e-27	-0.377005	0.039	0.366	2.79395e-23
Trib1	1.12541e-27	-0.49121	0.174	0.498	2.79709e-23
Actn1	1.13689e-27	-0.450271	0.552	0.748	2.82563e-23
C1qbp	1.30635e-27	0.342823	0.897	0.67	3.24681e-23
Gtf2e2	1.32597e-27	0.258748	0.569	0.264	3.29555e-23
Eif5a	1.52323e-27	0.27162	0.993	0.965	3.78583e-23
Pdlim7	1.5851e-27	-0.419415	0.391	0.646	3.93961e-23
Dctn3	1.69552e-27	0.315724	0.893	0.657	4.21405e-23
Hsd11b1	1.88729e-27	-0.575276	0.352	0.645	4.69068e-23
Nr4a2	2.19108e-27	-0.615602	0.566	0.809	5.44571e-23
Cdc42ep3	2.52231e-27	-0.610604	0.171	0.474	6.26894e-23
Zkscan1	2.57385e-27	0.319136	0.722	0.411	6.39704e-23
Lama5	2.91847e-27	-0.387703	0.238	0.55	7.25355e-23
Robo1	3.13774e-27	0.351395	0.587	0.289	7.79854e-23
Pam16	3.39256e-27	0.269555	0.619	0.3	8.43187e-23
2510009E07Rik	3.85808e-27	-0.42469	0.181	0.493	9.58888e-23
Iqgap2	3.9863e-27	-0.37371	0.117	0.446	9.90755e-23
Fbxl7	4.30346e-27	-0.440783	0.231	0.535	1.06958e-22
Timm8b	4.55874e-27	0.343321	0.893	0.672	1.13303e-22
Gcnt1	5.15763e-27	-0.323346	0.021	0.339	1.28188e-22
Swap70	6.70559e-27	-0.407383	0.196	0.502	1.66661e-22
Zfp608	6.80078e-27	-0.434889	0.238	0.549	1.69027e-22
Egfr	7.02939e-27	-0.351662	0.11	0.438	1.74709e-22
Cirbp	7.60059e-27	0.387635	0.964	0.843	1.88905e-22
Hmgb3	7.7923e-27	0.342308	0.922	0.753	1.9367e-22
Ptms	8.01523e-27	-0.380154	0.982	0.989	1.99211e-22
Hsph1	8.53366e-27	0.309867	0.655	0.338	2.12096e-22
Rab11b	1.25369e-26	-0.36278	0.819	0.88	3.11591e-22
Mlc1	1.47847e-26	-0.337125	0.046	0.369	3.67458e-22
Yrdc	1.51257e-26	0.269363	0.662	0.333	3.75934e-22
Ube3a	2.38289e-26	0.338802	0.897	0.692	5.92243e-22
Tjp2	2.44821e-26	-0.372196	0.231	0.537	6.08478e-22
Rrbp1	2.67841e-26	-0.428329	0.733	0.834	6.65691e-22
Wdr6	2.89674e-26	0.306795	0.733	0.437	7.19955e-22
Nip7	3.35841e-26	0.2569	0.747	0.414	8.34699e-22
Cyb5r3	3.38615e-26	-0.390403	0.484	0.692	8.41595e-22
Tulp4	3.38653e-26	0.32579	0.861	0.619	8.41688e-22
Comt	3.61494e-26	-0.379061	0.466	0.704	8.98457e-22
Fkbp9	3.76964e-26	-0.340534	0.153	0.467	9.36905e-22
Fam114a1	3.87357e-26	-0.330737	0.082	0.398	9.62736e-22
Creb3l2	5.41456e-26	0.358999	0.765	0.463	1.34574e-21
Bcl7c	5.44723e-26	-0.363044	0.779	0.874	1.35385e-21
Rcc2	6.5717e-26	0.320352	0.783	0.49	1.63333e-21
Polr3k	6.66487e-26	0.305533	0.665	0.346	1.65649e-21
Fam126a	8.04367e-26	-0.401147	0.313	0.589	1.99917e-21
Gtpbp4	8.36516e-26	0.330166	0.829	0.573	2.07908e-21
Plxnb2	9.38905e-26	-0.356695	0.253	0.54	2.33355e-21
Lamb2	1.07659e-25	-0.361449	0.189	0.491	2.67576e-21
Ocln	1.11052e-25	-0.408152	0.42	0.669	2.76008e-21
Pim3	1.20839e-25	0.316394	0.619	0.333	3.00333e-21
Nav2	1.6286e-25	-0.352078	0.181	0.496	4.04773e-21
Ankra2	2.11094e-25	0.256795	0.587	0.281	5.24652e-21
Fam102b	2.42221e-25	-0.368681	0.142	0.451	6.02017e-21
Rtp4	2.62805e-25	-0.416815	0.075	0.383	6.53175e-21
Bclaf1	2.77456e-25	0.331133	0.94	0.814	6.89588e-21
Ptprz1	3.39785e-25	-0.254647	0.1	0.419	8.44501e-21
Usmg5	3.53233e-25	0.29234	0.989	0.949	8.77926e-21
Cox17	3.69149e-25	0.285064	0.833	0.535	9.17482e-21
Rnf7	3.71147e-25	0.305996	0.936	0.74	9.22448e-21
Plekhb1	4.00493e-25	-0.35669	0.196	0.505	9.95386e-21
Shisa4	4.02074e-25	-0.385558	0.189	0.508	9.99314e-21
Atp5o.1	5.25381e-25	-0.362188	0.947	0.93	1.30578e-20
Antxr1	5.70361e-25	-0.360278	0.217	0.505	1.41758e-20
Scrn1	6.95312e-25	-0.321674	0.089	0.395	1.72813e-20
Etl4	9.46211e-25	-0.348113	0.185	0.498	2.35171e-20
Rfk	9.65148e-25	-0.35986	0.363	0.625	2.39878e-20
Llph	1.03098e-24	0.286992	0.861	0.583	2.56239e-20
Tmco1	1.28588e-24	-0.384162	0.683	0.785	3.19592e-20
Kcnk2	1.29497e-24	-0.440593	0.452	0.659	3.21852e-20
Psme4	1.34526e-24	0.26963	0.73	0.405	3.34352e-20
Prkce	1.6079e-24	0.254011	0.488	0.216	3.99627e-20
Tead2	1.61726e-24	0.349449	0.737	0.468	4.01954e-20
Impdh2	1.62766e-24	0.365655	0.911	0.735	4.04539e-20
Cst3	1.71574e-24	-0.333999	0.975	0.967	4.26429e-20
Rab3b	2.01417e-24	0.266063	0.544	0.246	5.00601e-20
Gm1673	2.2617e-24	0.344242	0.904	0.713	5.62122e-20
Pde4b	2.67857e-24	-0.40269	0.228	0.539	6.65733e-20
Cox8a	2.81e-24	-0.251695	0.996	0.995	6.98396e-20
Pkp4	2.92802e-24	-0.348061	0.117	0.412	7.2773e-20
Tril	3.48226e-24	-0.292816	0.018	0.308	8.65481e-20
Nap1l4	3.66325e-24	0.312887	0.843	0.573	9.10464e-20
Specc1	3.90622e-24	-0.348454	0.157	0.452	9.70852e-20
Gm26632	4.00404e-24	-0.408018	0.235	0.511	9.95164e-20
Lamp2	4.02522e-24	-0.388618	0.566	0.741	1.00043e-19
Ttc28	4.39375e-24	0.311684	0.715	0.409	1.09202e-19
Il17re	4.42097e-24	-0.281128	0.018	0.305	1.09879e-19
Mef2c	4.45674e-24	-0.386454	0.107	0.405	1.10768e-19
Ubc	6.09748e-24	-0.412137	0.975	0.974	1.51547e-19
Rhoa	6.40386e-24	-0.312903	0.94	0.954	1.59162e-19
Trpc1	7.07306e-24	-0.399991	0.349	0.605	1.75794e-19
Riok3	7.50697e-24	0.287363	0.527	0.255	1.86578e-19
Fzd3	7.51399e-24	-0.394856	0.762	0.844	1.86753e-19
Rsrc2	7.88739e-24	0.312714	0.95	0.833	1.96033e-19
Ets2	8.80676e-24	-0.360996	0.534	0.784	2.18883e-19
Sf3b3	8.95733e-24	0.311521	0.875	0.628	2.22626e-19
Mfge8	9.04511e-24	-0.36323	0.221	0.509	2.24807e-19
Cybrd1	9.14267e-24	-0.302628	0.025	0.314	2.27232e-19
Ptp4a1	9.48764e-24	-0.451884	0.854	0.889	2.35806e-19
Pdia6	9.64271e-24	-0.328279	0.907	0.934	2.3966e-19
Trappc4	1.12035e-23	0.298002	0.779	0.52	2.78451e-19
Rrs1	1.20063e-23	0.274102	0.594	0.297	2.98404e-19
Aimp1	1.26798e-23	0.30155	0.925	0.716	3.15143e-19
Sun1	1.28207e-23	0.283465	0.594	0.311	3.18645e-19
Col6a3	1.33744e-23	-0.453905	0.356	0.613	3.32407e-19
Snrpd3	1.54517e-23	0.282982	0.94	0.775	3.84036e-19
Hdgf	1.68051e-23	0.283878	0.986	0.893	4.17674e-19
Klf3	1.70638e-23	-0.411122	0.477	0.692	4.24105e-19
Hdlbp	1.82518e-23	-0.380257	0.705	0.808	4.53629e-19
Snrpd1	1.84934e-23	0.271715	0.94	0.8	4.59635e-19
Lsm6	2.28791e-23	0.29315	0.829	0.58	5.68636e-19
F2r	2.42588e-23	-0.399733	0.214	0.494	6.02929e-19
Plekhg2	2.58961e-23	-0.312655	0.114	0.408	6.43621e-19
Acadl	2.64877e-23	-0.39867	0.594	0.753	6.58326e-19
Ablim1	2.77805e-23	-0.284562	0.011	0.287	6.90456e-19
Ppargc1a	2.78278e-23	-0.449214	0.082	0.379	6.91632e-19
Gltp	2.78806e-23	-0.308608	0.16	0.445	6.92944e-19
Jarid2	3.04952e-23	0.263653	0.68	0.377	7.57928e-19
Id2	3.2147e-23	0.37317	0.537	0.266	7.9898e-19
Zfp467	3.22259e-23	-0.33249	0.174	0.472	8.00943e-19
Mical3	3.66772e-23	-0.350603	0.199	0.478	9.11575e-19
Pxdc1	3.68777e-23	-0.351676	0.071	0.368	9.16558e-19
Igsf9b	3.78696e-23	-0.371226	0.185	0.471	9.41212e-19
Tns1	3.8076e-23	-0.297689	0.078	0.366	9.46341e-19
P4ha3	3.88186e-23	-0.265857	0.011	0.287	9.64799e-19
Fbln5	4.6862e-23	-0.307122	0.011	0.286	1.16471e-18
Actl6a	4.80004e-23	0.29089	0.826	0.561	1.193e-18
Klf2	5.04881e-23	-0.479094	0.043	0.332	1.25483e-18
Gdi1	5.40381e-23	0.277354	0.58	0.303	1.34306e-18
Emp2	5.56838e-23	-0.28344	0.043	0.33	1.38397e-18
Zfp36l1	6.23324e-23	-0.540497	0.708	0.883	1.54921e-18
Btg2	8.21927e-23	0.267509	0.986	0.941	2.04282e-18
Tmem191c	8.28235e-23	0.262749	0.516	0.246	2.05849e-18
Pcm1	8.28256e-23	0.331539	0.943	0.818	2.05855e-18
Slc15a2	9.3144e-23	-0.286912	0.014	0.286	2.315e-18
Rtcb	9.76426e-23	0.283498	0.868	0.598	2.42681e-18
Stxbp6	9.78829e-23	-0.307528	0.05	0.333	2.43278e-18
Notch1	9.79133e-23	-0.329982	0.11	0.409	2.43354e-18
Pmp22	9.94809e-23	-0.309752	0.007	0.279	2.4725e-18
Oasl2	1.15688e-22	-0.356501	0.089	0.382	2.8753e-18
Marcksl1	1.19457e-22	0.267459	0.986	0.944	2.96898e-18
Socs3	1.19815e-22	-0.521401	0.16	0.434	2.97788e-18
Tuba1c	1.35672e-22	-0.419686	0.374	0.634	3.372e-18
Csnk2a1	1.36498e-22	0.287088	0.833	0.605	3.39252e-18
Samd9l	1.38163e-22	-0.292523	0.032	0.309	3.4339e-18
Rnd3	1.41943e-22	-0.453507	0.26	0.54	3.52784e-18
Gas6	1.47761e-22	-0.308566	0.046	0.328	3.67244e-18
Chmp5	1.69235e-22	0.29262	0.822	0.568	4.20616e-18
Sfn	1.95002e-22	-0.446037	0.028	0.303	4.84657e-18
Khdrbs3	1.97536e-22	-0.348102	0.434	0.639	4.90957e-18
Myo1b	2.08439e-22	0.252521	0.527	0.26	5.18053e-18
Svbp	2.15852e-22	-0.345871	0.495	0.688	5.36478e-18
Sgce	2.66352e-22	-0.338028	0.242	0.504	6.6199e-18
P4ha1	2.88283e-22	-0.390666	0.559	0.724	7.165e-18
Cmtm3	3.19939e-22	-0.296322	0.078	0.362	7.95176e-18
Ube2m	3.62056e-22	0.28885	0.915	0.706	8.99854e-18
Nbr1	4.18573e-22	0.267412	0.665	0.372	1.04032e-17
Myc	4.27978e-22	-0.431706	0.139	0.412	1.0637e-17
Flvcr1	5.06303e-22	-0.367567	0.093	0.37	1.25837e-17
Eid2	5.27587e-22	0.267875	0.683	0.396	1.31126e-17
Emc6	5.38877e-22	0.290282	0.883	0.642	1.33933e-17
Ets1	5.42071e-22	-0.298475	0.05	0.325	1.34726e-17
Prdx5	6.12359e-22	-0.3464	0.943	0.952	1.52196e-17
Hey2	6.12554e-22	-0.320422	0.039	0.317	1.52244e-17
Samd5	6.35696e-22	-0.262408	0.007	0.269	1.57996e-17
Snx3	6.45569e-22	-0.332091	0.68	0.796	1.6045e-17
Cited2	7.35263e-22	0.337972	0.509	0.246	1.82742e-17
Cetn2	8.35116e-22	0.299233	0.829	0.589	2.0756e-17
Ebna1bp2	9.08743e-22	0.259747	0.765	0.467	2.25859e-17
Mrpl34	9.27508e-22	0.273219	0.804	0.527	2.30523e-17
Nedd4l	9.97152e-22	-0.392922	0.338	0.581	2.47832e-17
Pfdn2	1.11701e-21	0.264341	0.915	0.727	2.77622e-17
Creb5	1.52398e-21	-0.360424	0.011	0.27	3.78769e-17
Itpkb	1.52748e-21	-0.340402	0.153	0.424	3.7964e-17
Cnot3	1.57493e-21	0.286345	0.79	0.51	3.91432e-17
Cast	1.59856e-21	-0.319901	0.128	0.41	3.97306e-17
Angptl4	1.61764e-21	-0.398659	0.064	0.334	4.02048e-17
Ajap1	1.64403e-21	-0.28215	0.064	0.343	4.08607e-17
Tnfaip2	1.92546e-21	-0.299997	0.011	0.269	4.78553e-17
Nop56	1.95874e-21	0.252339	0.74	0.455	4.86825e-17
Aga	2.00161e-21	0.270542	0.573	0.311	4.9748e-17
Metap2	2.11285e-21	0.263767	0.975	0.842	5.25126e-17
Otud1	2.13312e-21	-0.300574	0.064	0.335	5.30166e-17
1110004F10Rik	2.47192e-21	0.289524	0.95	0.793	6.14371e-17
Tspan3	2.53254e-21	-0.27272	0.972	0.97	6.29437e-17
Trim35	2.57488e-21	0.298371	0.822	0.562	6.39961e-17
Imp3	2.65249e-21	0.271205	0.836	0.6	6.5925e-17
Plcd4	2.66185e-21	-0.30316	0.053	0.326	6.61576e-17
Tsg101	2.92793e-21	0.255642	0.772	0.5	7.27709e-17
Scd2	3.06368e-21	0.296924	0.552	0.289	7.61446e-17
Pcbp1	3.06418e-21	0.274525	0.961	0.845	7.61571e-17
Irf2bpl	3.28037e-21	-0.414549	0.815	0.867	8.15304e-17
Dbi	3.37606e-21	-0.426672	0.861	0.914	8.39087e-17
Emc8	3.39478e-21	-0.393866	0.505	0.679	8.43739e-17
Hnrnpr	3.50941e-21	0.279298	0.954	0.795	8.72229e-17
Rbbp7	3.52168e-21	-0.333026	0.861	0.867	8.75277e-17
Smarcad1	3.71062e-21	0.288561	0.694	0.428	9.22238e-17
Gclc	4.58251e-21	-0.403335	0.274	0.502	1.13894e-16
Cacna2d1	5.26659e-21	0.3316	0.719	0.449	1.30896e-16
Hmcn1	5.71035e-21	-0.323628	0.189	0.459	1.41925e-16
Ntrk2	6.06566e-21	0.254104	0.612	0.319	1.50756e-16
Perp	6.24832e-21	-0.312232	0.1	0.369	1.55296e-16
Mpped2	6.58725e-21	-0.340488	0.331	0.581	1.6372e-16
Bex2	7.56388e-21	0.275107	0.968	0.78	1.87993e-16
Fos	9.85886e-21	-1.1277	0.473	0.689	2.45032e-16
Crb3	1.01201e-20	-0.334868	0.217	0.472	2.51525e-16
Smarca2	1.0958e-20	-0.352079	0.694	0.821	2.72351e-16
Apbb1ip	1.11056e-20	-0.306058	0.032	0.293	2.7602e-16
Capn2	1.11967e-20	-0.308012	0.242	0.492	2.78283e-16
Macc1	1.16053e-20	-0.413963	0.263	0.532	2.88438e-16
Ctsd	1.18136e-20	-0.336296	0.569	0.73	2.93614e-16
Tmed5	1.18978e-20	-0.451243	0.555	0.717	2.95708e-16
Irf9	1.31648e-20	-0.294303	0.103	0.377	3.27198e-16
Cpq	1.35732e-20	-0.337709	0.456	0.651	3.37349e-16
Tes	1.40137e-20	-0.388742	0.52	0.679	3.48297e-16
Tox2	1.43698e-20	-0.265388	0.046	0.313	3.57146e-16
Chka	1.66795e-20	-0.388786	0.633	0.781	4.14553e-16
Lrig3	1.70727e-20	-0.353787	0.185	0.445	4.24325e-16
Amer1	1.74363e-20	-0.333175	0.121	0.387	4.33362e-16
Capg	1.84072e-20	-0.31871	0.192	0.456	4.57492e-16
Plk2	2.54904e-20	-0.329678	0.043	0.302	6.33539e-16
Ptprk	2.75482e-20	-0.316407	0.381	0.6	6.84684e-16
Tiparp	2.76061e-20	-0.3837	0.242	0.496	6.86122e-16
Tcf7l2	2.92878e-20	-0.329748	0.512	0.696	7.27919e-16
Slc4a7	3.14741e-20	0.260254	0.744	0.435	7.82256e-16
Dbn1	3.16625e-20	0.279547	0.762	0.48	7.86939e-16
Pgls	3.36893e-20	0.278805	0.929	0.777	8.37315e-16
Cdk14	3.44533e-20	-0.335261	0.456	0.657	8.56301e-16
Ptprd	3.52149e-20	-0.383374	0.466	0.644	8.75232e-16
Sltm	3.55394e-20	0.310659	0.893	0.674	8.83296e-16
Ndufa11	3.98269e-20	0.264543	0.943	0.813	9.89857e-16
Arl4c	4.22351e-20	-0.364151	0.256	0.5	1.04971e-15
3930402G23Rik	4.54137e-20	-0.394355	0.071	0.331	1.12871e-15
Hexb	4.55468e-20	-0.271597	0.1	0.361	1.13202e-15
Mageh1	4.69421e-20	-0.458167	0.801	0.847	1.1667e-15
Pitx1	4.8637e-20	0.41776	0.804	0.621	1.20882e-15
Pttg1ip	5.84883e-20	-0.330353	0.356	0.586	1.45367e-15
Dhx30	6.19592e-20	0.254519	0.637	0.365	1.53993e-15
Prss8	6.38748e-20	-0.263533	0.068	0.329	1.58755e-15
Anxa4	7.07873e-20	0.273604	0.559	0.299	1.75935e-15
Eci2	8.62535e-20	-0.321124	0.804	0.884	2.14375e-15
Tsc22d3	8.77403e-20	-0.406471	0.463	0.628	2.1807e-15
Luc7l	8.84842e-20	0.259564	0.765	0.496	2.19919e-15
Plod2	1.00958e-19	-0.315914	0.178	0.431	2.50921e-15
Arf4	1.01463e-19	-0.302624	0.911	0.916	2.52176e-15
Coq10b	1.165e-19	-0.343425	0.683	0.832	2.89548e-15
Pitpnc1	1.31437e-19	-0.333069	0.178	0.441	3.26674e-15
Akap9	1.3446e-19	0.279302	0.95	0.785	3.34186e-15
Gprc5a	1.35968e-19	-0.306452	0.032	0.283	3.37934e-15
Dusp14	1.4552e-19	-0.272332	0.043	0.291	3.61674e-15
Tox	1.4657e-19	0.290864	0.715	0.45	3.64286e-15
Acadm	1.53023e-19	-0.317714	0.359	0.595	3.80324e-15
Nos1ap	1.62453e-19	-0.257365	0.071	0.328	4.0376e-15
Minos1	1.79343e-19	0.298308	0.947	0.807	4.4574e-15
Sgms2	2.05264e-19	-0.288627	0.046	0.296	5.10164e-15
Hspe1	2.06497e-19	0.281426	0.989	0.948	5.13227e-15
Airn	2.37917e-19	-0.292544	0.121	0.378	5.91319e-15
Cpd	2.38577e-19	-0.319207	0.263	0.514	5.9296e-15
Trappc13	2.52438e-19	0.250589	0.544	0.289	6.2741e-15
Ptpn1	2.61686e-19	0.282261	0.698	0.443	6.50394e-15
Mras	2.6729e-19	-0.301198	0.128	0.382	6.64323e-15
Fosl2	2.87623e-19	-0.411563	0.342	0.575	7.14858e-15
Csmd1	2.9067e-19	-0.312238	0.157	0.417	7.22432e-15
Dhx9	3.05789e-19	0.29465	0.897	0.674	7.60009e-15
Ier2	3.12934e-19	-0.69905	0.687	0.793	7.77766e-15
Bcl10	3.22839e-19	-0.356931	0.53	0.694	8.02384e-15
Irf1	3.30994e-19	-0.421952	0.238	0.496	8.22652e-15
Brd3	3.35587e-19	0.311989	0.847	0.622	8.34069e-15
Arid4b	3.38543e-19	0.288882	0.9	0.749	8.41416e-15
Angpt1	3.53315e-19	-0.268821	0.014	0.252	8.78129e-15
Net1	3.6404e-19	-0.340021	0.117	0.374	9.04786e-15
R3hdm1	3.9903e-19	0.265909	0.826	0.557	9.91748e-15
Gpha2	4.28716e-19	-0.488409	0.018	0.255	1.06553e-14
Ola1	4.45299e-19	0.261249	0.804	0.576	1.10675e-14
Vegfb	5.25475e-19	-0.317358	0.285	0.5	1.30602e-14
Capsl	5.27909e-19	-0.338533	0.345	0.555	1.31206e-14
Pea15a	6.26448e-19	-0.288442	0.149	0.404	1.55697e-14
Bola3	6.64945e-19	-0.316438	0.448	0.621	1.65265e-14
Dynll2	6.68224e-19	0.343088	0.904	0.714	1.6608e-14
Fbl	6.85322e-19	0.251381	0.822	0.575	1.7033e-14
Metrnl	7.53256e-19	-0.255731	0.039	0.282	1.87214e-14
Hmga2	7.84913e-19	-0.28607	0.082	0.338	1.95082e-14
Gm2a	8.08568e-19	-0.276866	0.142	0.392	2.00961e-14
Strap	8.22708e-19	0.263459	0.872	0.667	2.04476e-14
Spint2	9.10496e-19	-0.259151	0.961	0.98	2.26295e-14
Ier3	1.01963e-18	-0.358369	0.032	0.271	2.53419e-14
Bicc1	1.02232e-18	-0.29223	0.125	0.38	2.54087e-14
Tgif1	1.04504e-18	-0.320336	0.399	0.646	2.59733e-14
Dtna	1.06109e-18	-0.352521	0.544	0.707	2.63723e-14
Stat3	1.09616e-18	-0.358382	0.619	0.772	2.7244e-14
Anxa7	1.15414e-18	-0.296367	0.199	0.453	2.86849e-14
Ybx3	1.17204e-18	-0.3133	0.701	0.828	2.91298e-14
St14	1.24104e-18	-0.280157	0.142	0.391	3.08448e-14
Rbm25	1.40851e-18	0.257205	0.961	0.904	3.50071e-14
1110038F14Rik	1.50279e-18	0.252588	0.754	0.499	3.73504e-14
Mbp	1.60835e-18	0.407567	0.391	0.165	3.9974e-14
Ndufab1	1.84329e-18	0.26646	0.947	0.788	4.58131e-14
Pofut2	1.91113e-18	-0.324501	0.534	0.674	4.74992e-14
Tax1bp3	1.95789e-18	-0.310902	0.335	0.549	4.86615e-14
B4galt5	2.11125e-18	-0.316013	0.231	0.467	5.24731e-14
Sh3bgrl2	2.13722e-18	-0.261636	0.064	0.308	5.31184e-14
Loxl1	2.15172e-18	-0.271741	0.103	0.351	5.34788e-14
Rbfox2	2.19351e-18	0.266627	0.804	0.552	5.45176e-14
Tmem141	2.41744e-18	-0.30451	0.199	0.432	6.00831e-14
Mtf2	2.48716e-18	0.258034	0.63	0.374	6.18158e-14
Mpp2	3.11304e-18	-0.260411	0.05	0.287	7.73716e-14
Bax	3.12993e-18	0.277843	0.776	0.542	7.77913e-14
Bcap31	3.33083e-18	-0.296907	0.58	0.719	8.27844e-14
Igfbp3	3.38595e-18	-0.466793	0.036	0.266	8.41544e-14
Lcorl	4.82088e-18	0.278712	0.58	0.326	1.19818e-13
Smarca5	4.85318e-18	0.265795	0.972	0.868	1.20621e-13
Hivep2	5.12846e-18	-0.252199	0.078	0.324	1.27463e-13
Nme7	5.3912e-18	-0.313683	0.217	0.439	1.33993e-13
Map1lc3b	5.56972e-18	-0.284005	0.95	0.953	1.3843e-13
Ppic	5.61e-18	-0.3185	0.384	0.594	1.39431e-13
Dclk1	6.51106e-18	-0.338864	0.331	0.561	1.61826e-13
Cplx2	7.27907e-18	0.286885	0.591	0.343	1.80914e-13
Aaed1	7.44901e-18	-0.311399	0.285	0.514	1.85138e-13
Vsig10	9.51692e-18	-0.324777	0.203	0.444	2.36534e-13
Gbp7	1.03589e-17	-0.33222	0.043	0.274	2.5746e-13
Iscu	1.48603e-17	-0.282301	0.751	0.831	3.69337e-13
Gjc1	1.49029e-17	-0.296679	0.196	0.425	3.70396e-13
Igsf3	1.68552e-17	-0.269294	0.157	0.401	4.1892e-13
Fjx1	1.6928e-17	-0.362525	0.128	0.372	4.20729e-13
Mdh2	1.70808e-17	0.252209	0.954	0.839	4.24527e-13
Cox6b2	1.75908e-17	-0.335726	0.093	0.328	4.37202e-13
2900026A02Rik	1.84034e-17	-0.310952	0.249	0.484	4.57397e-13
Ltbp4	1.87999e-17	-0.341451	0.342	0.554	4.67252e-13
Ccar1	2.06332e-17	0.270649	0.911	0.746	5.12817e-13
Ing2	2.86756e-17	-0.379058	0.359	0.556	7.12704e-13
Lig1	2.97632e-17	-0.480531	0.192	0.418	7.39734e-13
Pid1	2.98449e-17	-0.288045	0.078	0.313	7.41764e-13
Arap2	3.15307e-17	-0.315584	0.338	0.561	7.83665e-13
Mal2	3.23895e-17	-0.296198	0.21	0.438	8.05009e-13
Atp6v0b	3.5505e-17	0.266728	0.861	0.661	8.82441e-13
Gpi1	4.53022e-17	-0.282241	0.858	0.876	1.12594e-12
Tubb2b	4.54339e-17	0.479963	0.826	0.724	1.12921e-12
Mafk	5.07232e-17	-0.253549	0.093	0.327	1.26067e-12
Rgs6	5.95504e-17	-0.305249	0.128	0.359	1.48007e-12
Rcn3	6.0471e-17	-0.316827	0.238	0.459	1.50295e-12
Peli2	6.20635e-17	-0.257389	0.128	0.365	1.54253e-12
Usp29	7.15636e-17	-0.468746	0.477	0.61	1.77864e-12
Rgs9	7.46357e-17	-0.261695	0.103	0.338	1.855e-12
Rit2	7.90309e-17	-0.269354	0.046	0.269	1.96423e-12
Atox1	8.39006e-17	-0.314557	0.783	0.843	2.08527e-12
Lpp	1.09949e-16	-0.337728	0.534	0.676	2.73266e-12
Lgr4	1.13007e-16	0.268903	0.754	0.533	2.80867e-12
Serpinb6a	1.22657e-16	-0.32115	0.441	0.61	3.04852e-12
Ctdsp2	1.37919e-16	-0.287539	0.47	0.642	3.42785e-12
Adamts9	1.42806e-16	-0.278575	0.142	0.381	3.54929e-12
Fosl1	1.50439e-16	-0.39655	0.199	0.438	3.73901e-12
Arhgef5	1.52447e-16	-0.270207	0.235	0.459	3.78893e-12
Flrt3	1.53989e-16	-0.34733	0.214	0.446	3.82724e-12
Hmgb1	1.57125e-16	-0.319739	0.996	0.995	3.90518e-12
Map2k3	1.61862e-16	-0.285568	0.142	0.369	4.02291e-12
Tmem47	1.81106e-16	-0.314655	0.342	0.548	4.50121e-12
Selenom	1.81574e-16	-0.31259	0.359	0.566	4.51283e-12
Agrn	1.87122e-16	-0.283733	0.199	0.419	4.65074e-12
Cd151	2.05682e-16	-0.292406	0.263	0.47	5.11202e-12
Clstn1	2.06056e-16	-0.293768	0.395	0.589	5.12131e-12
Rassf1	2.10674e-16	-0.369822	0.502	0.644	5.23608e-12
Arl4a	2.14365e-16	0.316662	0.694	0.438	5.32784e-12
Arpc2	2.30024e-16	-0.28003	0.879	0.912	5.71703e-12
Plxdc2	2.87802e-16	-0.289833	0.235	0.461	7.15302e-12
Nrep	2.9963e-16	-0.324656	0.434	0.614	7.44701e-12
Fbln1	3.22301e-16	-0.30862	0.231	0.463	8.01047e-12
Psmb2	3.8618e-16	0.257717	0.954	0.885	9.59811e-12
Jak2	4.19582e-16	-0.26758	0.174	0.402	1.04283e-11
Tpbg	4.79258e-16	-0.322539	0.409	0.589	1.19115e-11
Ubn2	5.6676e-16	0.250746	0.822	0.62	1.40863e-11
Fxr1	5.69206e-16	0.274317	0.868	0.744	1.4147e-11
Nectin3	5.8869e-16	-0.308585	0.374	0.56	1.46313e-11
Rtn4	6.23977e-16	-0.29448	0.886	0.894	1.55083e-11
Pls1	6.51869e-16	-0.272114	0.153	0.384	1.62015e-11
Klhl21	6.76877e-16	-0.26493	0.121	0.342	1.68231e-11
Cfap20	7.61738e-16	-0.274941	0.68	0.756	1.89322e-11
Slc25a5	7.65958e-16	0.25112	0.964	0.864	1.90371e-11
Col18a1	7.78795e-16	-0.301483	0.484	0.65	1.93562e-11
Nfkbiz	8.54298e-16	-0.294426	0.096	0.32	2.12327e-11
Pdlim1	9.72562e-16	-0.260847	0.053	0.265	2.41721e-11
Arhgap29	1.05825e-15	-0.263006	0.089	0.31	2.63018e-11
Pdlim5	1.12644e-15	-0.295509	0.178	0.405	2.79966e-11
Chd4	1.19569e-15	0.286627	0.936	0.839	2.97178e-11
Baz2b	1.22589e-15	0.268432	0.883	0.689	3.04683e-11
Sgms1	1.4017e-15	-0.298794	0.263	0.474	3.48379e-11
H1f0	1.52407e-15	-0.487663	0.619	0.694	3.78794e-11
Lrp6	1.61838e-15	-0.290052	0.452	0.598	4.02233e-11
Lifr	1.97808e-15	-0.252022	0.064	0.276	4.91633e-11
Ptgfrn	2.06791e-15	-0.260297	0.189	0.41	5.13959e-11
Crip2	2.07951e-15	-0.277131	0.854	0.914	5.16842e-11
P4hb	2.14529e-15	-0.284557	0.722	0.78	5.33189e-11
Vamp8	2.51035e-15	-0.278296	0.63	0.736	6.23922e-11
Cldn6	2.61182e-15	-0.419003	0.484	0.627	6.49142e-11
Nppc	2.61359e-15	-0.261332	0.05	0.261	6.49581e-11
Parva	3.02097e-15	-0.292003	0.58	0.704	7.50832e-11
Nucb1	3.4198e-15	-0.27046	0.441	0.604	8.49957e-11
Dusp8	5.31425e-15	-0.343298	0.263	0.477	1.3208e-10
Ddx21	5.43171e-15	0.294063	0.826	0.593	1.35e-10
Magi3	5.87679e-15	-0.265626	0.167	0.38	1.46062e-10
Hspa4	5.90767e-15	0.25025	0.9	0.737	1.46829e-10
Kcnma1	6.55996e-15	-0.276562	0.149	0.361	1.63041e-10
Top2b	6.72e-15	0.262473	0.872	0.711	1.67019e-10
Spred1	7.07585e-15	-0.292822	0.409	0.582	1.75863e-10
Tmcc1	7.42564e-15	0.288836	0.751	0.547	1.84557e-10
Slc27a1	7.61155e-15	-0.269933	0.295	0.497	1.89177e-10
Per1	1.01861e-14	-0.254882	0.263	0.475	2.53164e-10
Palmd	1.09948e-14	-0.286746	0.11	0.325	2.73265e-10
Dusp3	1.12478e-14	-0.296055	0.235	0.444	2.79552e-10
Fndc3b	1.21644e-14	-0.274228	0.278	0.492	3.02335e-10
Ifi27l2a	1.37853e-14	-0.425353	0.064	0.268	3.42619e-10
Tfdp2	1.41116e-14	0.252388	0.69	0.48	3.5073e-10
Cd200	1.46571e-14	-0.273814	0.228	0.432	3.64287e-10
Socs2	1.59459e-14	-0.328355	0.637	0.771	3.96319e-10
Ube2h	1.90141e-14	-0.318511	0.587	0.687	4.72576e-10
Pcp4	1.96697e-14	-0.31063	0.093	0.303	4.88872e-10
Dhrs1	2.34094e-14	-0.263651	0.423	0.574	5.81817e-10
Lrpap1	2.41364e-14	-0.276162	0.662	0.761	5.99886e-10
Crabp2	2.45845e-14	-0.38681	0.342	0.539	6.11022e-10
Odc1	2.64371e-14	-0.307806	0.858	0.874	6.57069e-10
Mlf1	2.76814e-14	-0.25991	0.082	0.293	6.87995e-10
Tmod1	3.35045e-14	-0.264503	0.075	0.273	8.32722e-10
Nrg1	3.77809e-14	-0.295518	0.075	0.276	9.39007e-10
Hsp90b1	4.15789e-14	-0.280269	0.968	0.956	1.0334e-09
Mtss1	5.06126e-14	-0.279036	0.285	0.485	1.25793e-09
Erbin	6.44346e-14	-0.300823	0.587	0.689	1.60146e-09
Plcb4	6.553e-14	-0.28303	0.356	0.546	1.62868e-09
Anapc13	7.02887e-14	-0.266649	0.779	0.833	1.74695e-09
Fam213a	7.07076e-14	-0.27234	0.591	0.693	1.75737e-09
Sptssa	7.24506e-14	-0.262124	0.598	0.7	1.80069e-09
Ptp4a2	7.42736e-14	-0.264536	0.915	0.894	1.846e-09
Ano6	7.46209e-14	-0.259255	0.253	0.445	1.85463e-09
Mlec	7.51228e-14	-0.260353	0.594	0.681	1.8671e-09
Tspan7	9.69078e-14	-0.253452	0.235	0.429	2.40855e-09
Rbms3	1.04595e-13	-0.282166	0.292	0.482	2.59962e-09
Snhg18	1.18382e-13	-0.272157	0.185	0.378	2.94226e-09
Nfat5	1.24328e-13	-0.372749	0.598	0.68	3.09004e-09
Plagl1	1.25127e-13	-0.323841	0.217	0.418	3.10991e-09
Prdx6	1.29951e-13	-0.319375	0.751	0.825	3.22981e-09
Tcn2	2.0804e-13	-0.253302	0.206	0.393	5.17062e-09
Rela	2.21371e-13	-0.276446	0.263	0.453	5.50196e-09
Ptn	2.37663e-13	-0.442028	0.505	0.646	5.90689e-09
Atad2	2.91161e-13	-0.302277	0.071	0.263	7.23652e-09
Txndc5	3.32837e-13	-0.253494	0.338	0.505	8.27233e-09
Tpm3	3.85282e-13	-0.272399	0.875	0.894	9.57579e-09
Tapbp	5.00014e-13	-0.255836	0.352	0.531	1.24273e-08
Txnrd1	5.78672e-13	-0.329706	0.534	0.66	1.43823e-08
Etfb	6.55132e-13	-0.266348	0.69	0.768	1.62826e-08
Spry2	7.13198e-13	-0.304779	0.285	0.475	1.77258e-08
Ndrg1	7.25305e-13	-0.25767	0.096	0.284	1.80267e-08
Sod1	8.95777e-13	-0.253014	0.769	0.811	2.22636e-08
Map1lc3a	9.43067e-13	-0.275718	0.851	0.865	2.3439e-08
Cgn	1.04047e-12	-0.256288	0.253	0.43	2.58598e-08
Bambi	1.06508e-12	-0.260361	0.078	0.271	2.64715e-08
Srxn1	1.07187e-12	-0.307749	0.085	0.273	2.66404e-08
Por	1.24291e-12	-0.289541	0.48	0.597	3.08913e-08
Cldn9	1.4015e-12	-0.311933	0.505	0.664	3.48328e-08
Gng11	1.40953e-12	-0.253427	0.157	0.352	3.50324e-08
Myadm	1.56255e-12	-0.275629	0.288	0.485	3.88356e-08
Hmgcs1	1.75801e-12	-0.380244	0.502	0.621	4.36937e-08
Itga6	1.77295e-12	-0.27578	0.299	0.482	4.4065e-08
H2afv	1.87587e-12	-0.385084	0.968	0.947	4.66229e-08
Gh	2.07157e-12	-0.33087	0.078	0.283	5.14869e-08
Nexn	2.17486e-12	-0.265541	0.139	0.336	5.4054e-08
Ccdc88c	2.18797e-12	-0.282428	0.47	0.604	5.43799e-08
Rhoq	2.24766e-12	-0.253799	0.228	0.411	5.58633e-08
Nr3c1	2.45262e-12	-0.255263	0.32	0.494	6.09575e-08
Sptlc2	3.04567e-12	-0.253845	0.37	0.534	7.56971e-08
Acsl3	3.65836e-12	0.254467	0.879	0.771	9.09248e-08
Eif1ax	4.02362e-12	-0.257943	0.694	0.75	1.00003e-07
Dusp1	4.2854e-12	-0.610056	0.416	0.566	1.06509e-07
Usp25	4.84554e-12	-0.270174	0.374	0.518	1.20431e-07
Arpc1b	5.76179e-12	-0.258245	0.377	0.53	1.43204e-07
Wfdc2	6.50216e-12	-0.278672	0.804	0.898	1.61605e-07
Mcm6	7.48048e-12	-0.324374	0.171	0.351	1.8592e-07
Frat2	8.25687e-12	-0.336009	0.352	0.499	2.05216e-07
Ogfrl1	9.09997e-12	-0.276191	0.356	0.501	2.26171e-07
Ddah2	9.32766e-12	-0.291743	0.762	0.814	2.3183e-07
Zmat4	1.70175e-11	0.259949	0.491	0.303	4.22954e-07
Pde10a	1.74463e-11	0.30177	0.907	0.753	4.3361e-07
Spty2d1	1.81125e-11	-0.301311	0.473	0.578	4.50168e-07
Zfhx4	2.19809e-11	-0.293605	0.687	0.729	5.46313e-07
Cldn3	4.17668e-11	-0.306931	0.932	0.941	1.03807e-06
Wsb1	6.09328e-11	-0.275155	0.459	0.582	1.51442e-06
Vcl	7.45293e-11	-0.284601	0.665	0.75	1.85235e-06
Amot	8.50509e-11	-0.250857	0.384	0.536	2.11386e-06
Nnat	8.58267e-11	1.29437	0.897	0.895	2.13314e-06
Atp2b1	1.25323e-10	-0.250754	0.865	0.891	3.11479e-06
Dmxl1	1.26818e-10	-0.323172	0.658	0.701	3.15193e-06
Stag1	2.138e-10	-0.257909	0.495	0.599	5.31378e-06
Ndel1	2.24923e-10	-0.254683	0.544	0.643	5.59023e-06
Dusp6	2.61702e-10	-0.257149	0.178	0.341	6.50435e-06
Id4	3.38497e-10	-0.301834	0.221	0.394	8.41301e-06
Ptgds	5.73975e-10	-0.284519	0.502	0.609	1.42656e-05
Siva1	7.10605e-10	-0.302682	0.648	0.675	1.76614e-05
Fzd2	9.33678e-10	-0.251557	0.27	0.425	2.32056e-05
Hbegf	1.409e-09	-0.386086	0.178	0.331	3.50194e-05
Egr2	2.75128e-09	-0.280984	0.192	0.339	6.83803e-05
Tsc22d2	1.69258e-08	-0.282046	0.566	0.62	0.000420675
Irf2bp2	2.00525e-08	-0.270754	0.722	0.753	0.000498385
Rock2	2.27994e-08	-0.264343	0.683	0.72	0.000566657
Atp2a2	2.91893e-08	-0.269164	0.783	0.804	0.000725472
Kcnq1ot1	3.12338e-08	0.278296	0.925	0.828	0.000776285
Klf9	1.27643e-07	-0.264177	0.63	0.675	0.00317245
Rheb	2.0869e-07	-0.256296	0.954	0.926	0.00518677
Cstb	3.31867e-07	-0.25777	0.819	0.835	0.00824823
Sat1	4.20139e-07	-0.297696	0.267	0.375	0.0104421
Arid5b	7.00649e-07	-0.300668	0.52	0.577	0.0174139
Ccnd2	9.81587e-07	-0.654049	0.74	0.695	0.0243964
Dek	1.95308e-06	-0.278935	0.929	0.876	0.0485419
Tceal8	3.74392e-06	-0.299597	0.907	0.871	0.0930515
Picalm	1.09751e-05	-0.256454	0.701	0.715	0.272776
Fam46a	1.19207e-05	0.295842	0.587	0.459	0.296278
Arl6ip1	3.57461e-05	-0.313717	0.886	0.843	0.888433
Brwd3	4.44926e-05	-0.263536	0.406	0.465	1
Krt17	6.93363e-05	-0.493141	0.238	0.334	1
Hbb-bs	0.00114155	-1.02901	0.292	0.196	1
Smc2	0.00988669	-0.318278	0.267	0.305	1
Smc4	0.0572154	-0.267426	0.331	0.343	1
H2afx	0.864397	-0.2885	0.498	0.428	1

## Sheet: B
GO analysis of genes upregulated in Gonado Prog versus SC1+SC2+Prolif SC (neonatal AP)
Pathway name	P-value	FDR q-value	Enrichment (N, B, n, b)	-log10(FDRq)
regulation of hormone levels	1.15e-05	0.0545	3.93 (426,22,64,13)	1.2636
sensory organ development	3.39e-05	0.0802	12.17 (426,7,25,5)	1.09583
multicellular organismal process	3.93e-05	0.0619	2.06 (426,100,64,31)	1.20831
columnar/cuboidal epithelial cell differentiation	8.64e-05	0.102	5.71 (426,9,58,7)	0.9914
regulation of developmental process	0.000111	0.105	1.38 (426,93,229,69)	0.978811
embryonic morphogenesis	0.00013	0.103	1.80 (426,22,226,21)	0.987163
regulation of cell differentiation	0.000137	0.0924	1.41 (426,76,234,59)	1.03433
regulation of nervous system development	0.000164	0.097	1.54 (426,51,222,41)	1.01323
regulation of multicellular organismal development	0.000193	0.101	1.40 (426,78,234,60)	0.995679
regulation of multicellular organismal process	0.00022	0.104	1.75 (426,101,94,39)	0.982967
secretion	0.00032	0.138	3.43 (426,18,76,11)	0.860121
positive regulation of multicellular organismal process	0.000345	0.136	1.90 (426,74,94,31)	0.866461
positive regulation of transcription by RNA polymerase II	0.00035	0.127	1.47 (426,52,240,43)	0.896196
animal organ development	0.000355	0.12	3.83 (426,49,25,11)	0.920819
eye development	0.000358	0.113	19.97 (426,4,16,3)	0.946922
camera-type eye development	0.000358	0.106	19.97 (426,4,16,3)	0.974694
neuroepithelial cell differentiation	0.000362	0.101	6.96 (426,6,51,5)	0.995679
positive regulation of developmental process	0.000364	0.0956	1.46 (426,62,226,48)	1.01954
regulation of cell development	0.000392	0.0975	1.51 (426,52,222,41)	1.011
regulation of neurogenesis	0.000432	0.102	1.53 (426,49,222,39)	0.9914
regulation of hormone secretion	0.000445	0.1	3.99 (426,15,64,9)	1
positive regulation of hormone secretion	0.000633	0.136	4.66 (426,10,64,7)	0.866461
signal release	0.00064	0.132	4.66 (426,10,64,7)	0.879426
positive regulation of macromolecule biosynthetic process	0.000694	0.137	1.40 (426,74,226,55)	0.863279
glandular epithelial cell differentiation	0.000697	0.132	16.82 (426,4,19,3)	0.879426
regulation of neuron differentiation	0.000757	0.138	1.55 (426,42,222,34)	0.860121
cardiac septum morphogenesis	0.000769	0.135	5.15 (426,8,62,6)	0.869666
positive regulation of cell differentiation	0.000782	0.132	2.05 (426,53,94,24)	0.879426
negative regulation of cytoskeleton organization	0.000847	0.138	2.93 (426,10,131,9)	0.860121
