# Supplementary material for: Decoding the activated stem cell phenotype of the neonatally maturing pituitary
Source: eLife. 2022 Jun 14;11:e75742. doi: 10.7554/eLife.75742 (PMC9333987; doi:10.7554/eLife.75742)
Supplement: Figure 3—source data 1. — (A) DEG analysis in SC1+SC2+Prolif SC of neonatal versus adult AP. The columns represent: gene names (Gene), p values (p_val), average log fold change expression (avg_logFC; positive values indicate upregulation and negative values downregulation in neonatal), percentage of cells expressing the indicated gene in neonatal (pct.1) and in adult (pct.2), and the FDR adjusted p value (p_val_adj). (B) Gene Ontology (GO) analysis of genes upregulated in neonatal versus adult SC1+SC2+Prolif SC. Analyses were performed using Reactome overrepresentation analysis. Pathway name, number of mapped identifiers that match the pathway (#Entities found), total number of identifiers in the pathway (#Entities total), total entities in the pathway/total number of entities for the entire species (Entities ratio), p value, FDR, and −log10(FDR) are shown in the columns. Associated with Figure 3A, B. [file elife-75742-fig3-data1.xlsx]

## Sheet: A
DEGs neonatal versus adult (SC1+SC2+Prolif SC)
Gene	p_val	avg_logFC	pct.1	pct.2	p_val_adj
2310036O22Rik	0	-0.990402	0	0.622	0
Atp5o	0	-1.04605	0	0.649	0
Prkcdbp	0	-1.06747	0	0.597	0
Tceb1	0	-1.09864	0	0.656	0
Myeov2	0	-1.1014	0	0.683	0
Gltscr2	0	-1.21482	0	0.688	0
Hn1	0	-1.38036	0	0.678	0
Fam101b	0	-1.38489	0	0.676	0
2700060E02Rik	0	-1.41294	0	0.803	0
Nhp2l1	0	-1.41857	0	0.786	0
Ngfrap1	0	-1.55916	0	0.808	0
Shfm1	0	-1.58105	0	0.848	0
Gnb2l1	0	-1.62318	0	0.818	0
Selm	0	-1.68042	0	0.865	0
Tceb2	0	-1.78246	0	0.882	0
Sep15	0	-1.79727	0	0.882	0
Selk	0	-2.05546	0	0.926	0
Wbp5	0	-2.06031	0	0.919	0
Sepw1	0	-2.2886	0	0.946	0
Cyp2f2	0	-2.48017	0.137	0.953	0
Prl	0	-3.55587	0.017	0.676	0
1810011O10Rik	4.39292e-293	-1.199	0	0.558	1.09182e-288
Lcn2	1.05332e-291	-2.16392	0.103	0.855	2.61793e-287
Rpl23a-ps3	6.7198e-289	-0.786531	0	0.55	1.67014e-284
Scn1b	8.44513e-289	-1.04295	0.013	0.612	2.09895e-284
Fam195b	2.46563e-283	-0.786461	0	0.541	6.12809e-279
Stra13	6.03138e-282	-0.788926	0	0.538	1.49904e-277
Apoa1bp	8.70011e-278	-0.807667	0	0.531	2.16233e-273
Fam134b	2.28998e-265	-0.824906	0	0.509	5.69153e-261
Zfos1	1.28331e-262	-0.734818	0	0.504	3.18953e-258
Gm9843	1.28331e-262	-0.744054	0	0.504	3.18953e-258
1110001J03Rik	7.12256e-260	-0.723113	0	0.499	1.77024e-255
Tonsl	1.19398e-259	-0.99477	0.033	0.636	2.96751e-255
Selt	4.95566e-253	-0.6489	0	0.486	1.23168e-248
Vimp	1.14938e-251	-0.682622	0	0.484	2.85668e-247
0610011F06Rik	1.41355e-247	-0.740086	0	0.477	3.51323e-243
Fam134a	3.24724e-246	-0.6882	0	0.474	8.07068e-242
Sepp1	3.24724e-246	-0.736815	0	0.474	8.07068e-242
2810428I15Rik	3.88061e-242	-0.669026	0	0.467	9.64487e-238
Erdr1	1.02548e-236	-0.657766	0	0.457	2.54872e-232
Srp54b	9.95578e-227	-0.610126	0.003	0.455	2.47441e-222
Rack1	3.20647e-226	2.89408	0.999	0	7.96935e-222
Gm42418	4.67303e-225	3.1781	1	0.452	1.16143e-220
Tceal9	3.00724e-224	2.31665	0.994	0	7.4742e-220
Mfsd7b	3.11804e-223	-0.78737	0	0.432	7.74959e-219
Tpt1	3.12354e-221	1.38087	1	0.983	7.76324e-217
H3f3a	4.96842e-221	1.38478	1	0.924	1.23485e-216
Rpl15	5.03259e-221	1.56848	0.997	0.857	1.2508e-216
1810043H04Rik	1.50719e-220	-0.62129	0	0.428	3.74597e-216
Elob	1.56367e-220	1.89748	0.985	0	3.88634e-216
Selenow	3.82763e-220	1.86938	0.985	0	9.51319e-216
Sem1	9.35973e-220	1.87064	0.984	0	2.32627e-215
Rps21	1.53857e-219	1.28105	1	0.948	3.82395e-215
Rpl30	1.01316e-218	1.31736	0.999	0.921	2.5181e-214
Rps24	5.25809e-217	1.22523	0.999	0.956	1.30685e-212
Rps20	7.22885e-217	1.23917	1	0.948	1.79666e-212
BC029214	3.42365e-215	-0.571469	0	0.418	8.50913e-211
Rps12	4.66852e-214	1.23401	1	0.926	1.16031e-209
Rpl13a	1.16017e-213	-2.15518	0.864	0.99	2.88348e-209
Rps10	1.78431e-213	1.11751	0.999	0.956	4.43474e-209
Rps26	2.3964e-212	1.28317	1	0.939	5.95601e-208
Selenof	4.3973e-212	1.66803	0.965	0	1.09291e-207
Rpl23	1.50602e-211	1.06513	1	0.983	3.74305e-207
Dpcd	1.61062e-208	-0.570421	0	0.405	4.00304e-204
Hspb1	1.59374e-206	-3.04344	0.612	0.985	3.96108e-202
Rtraf	1.90044e-206	1.5465	0.952	0	4.72335e-202
mt-Nd3	5.77933e-205	1.5365	0.993	0.658	1.4364e-200
Ptrf	1.5788e-204	-0.696942	0	0.398	3.92394e-200
Rpl39	1.16447e-203	1.06286	0.999	0.968	2.89418e-199
Erbb2ip	3.36316e-203	-0.579908	0	0.396	8.3588e-199
Rpl28	7.47521e-203	0.991467	1	0.963	1.85789e-198
Bex3	2.22547e-202	1.62445	0.942	0	5.53119e-198
Ces1d	1.0411e-201	-1.18225	0.07	0.636	2.58754e-197
mt-Co2	2.14437e-201	0.952674	0.999	0.995	5.32962e-197
Gm8730	1.51552e-200	-0.520593	0	0.391	3.76667e-196
mt-Nd2	7.6967e-200	1.27499	0.998	0.909	1.91294e-195
Selenok	8.09619e-200	1.33412	0.935	0	2.01223e-195
Fau	8.30331e-199	0.887238	1	0.985	2.06371e-194
Atp5o.1	8.03555e-198	1.50914	0.93	0	1.99715e-193
Cxx1a	1.42469e-196	-0.510542	0	0.383	3.54093e-192
Zswim6	1.42469e-196	-0.659173	0	0.383	3.54093e-192
Rps8	6.64547e-196	0.812024	1	0.998	1.65166e-191
Gstm1	2.90289e-195	-2.2353	0.818	1	7.21483e-191
Rplp0	3.06235e-195	0.879163	1	0.993	7.61116e-191
Rpl12	2.25607e-194	1.03048	1	0.904	5.60724e-190
Ppp2r4	6.27285e-194	-0.518689	0	0.378	1.55906e-189
Rpl27a	8.15869e-194	0.810179	1	0.983	2.02776e-189
Rps13	4.35548e-193	0.811878	0.999	0.968	1.08251e-188
0610007P14Rik	2.73649e-191	-0.553889	0	0.373	6.80128e-187
Peg3	4.60564e-191	2.14708	0.983	0.479	1.14469e-186
Ndnl2	5.6958e-190	-0.472548	0	0.371	1.41564e-185
Eef1b2	1.40148e-189	1.17958	0.996	0.737	3.48324e-185
Hnrnpa0	2.56466e-189	1.31894	0.976	0.393	6.3742e-185
Rpl29	9.10903e-188	0.950447	0.999	0.872	2.26396e-183
Rps15a	2.04688e-187	0.816922	0.999	0.966	5.08733e-183
Pla2g7	2.08625e-187	-1.64926	0.216	0.813	5.18515e-183
2700094K13Rik	5.06565e-186	-0.473876	0	0.364	1.25902e-181
Rpl6	8.06613e-186	0.802332	1	0.978	2.00476e-181
Rps7	1.93794e-185	0.8391	0.999	0.968	4.81656e-181
Rpl5	6.86582e-185	0.968437	0.997	0.875	1.70643e-180
Rpl6l	4.41295e-182	-0.449595	0	0.356	1.09679e-177
2210013O21Rik	9.0386e-181	-0.513958	0	0.354	2.24645e-176
Rps28	5.49717e-180	0.943352	1	0.963	1.36627e-175
Eef1a1	1.45378e-179	0.695437	1	0.998	3.61323e-175
Carkd	1.84705e-179	-0.499247	0	0.351	4.59066e-175
Rps29	3.12379e-177	0.782464	1	0.993	7.76387e-173
Rpl34	1.24611e-175	0.744658	0.999	0.975	3.09709e-171
Rpl32	2.24216e-175	0.689268	1	0.983	5.57267e-171
Snu13	1.42657e-174	1.1365	0.869	0	3.54559e-170
Rps3a1	7.69997e-174	0.745155	0.999	0.975	1.91375e-169
Rpl22	4.04881e-173	0.929465	0.997	0.872	1.00629e-168
Ict1	6.36028e-173	-0.451322	0	0.339	1.58078e-168
Nedd4	1.68109e-171	1.00482	0.995	0.732	4.17819e-167
Rpsa	3.69918e-171	0.766462	0.999	0.966	9.19395e-167
AY036118	3.97748e-171	1.2484	0.903	0.091	9.88562e-167
Rps27a	1.35089e-170	0.683799	1	0.99	3.35751e-166
Psap	1.44283e-169	-1.25642	0.964	0.995	3.58602e-165
Trir	4.4691e-166	1.04041	0.846	0	1.11075e-161
Purb	5.92293e-164	1.14812	0.974	0.445	1.47208e-159
Mfap2	1.43823e-163	1.15928	0.934	0.204	3.57457e-159
Rpl38	8.66134e-163	0.74839	0.998	0.978	2.15269e-158
Mllt4	1.6266e-162	-0.409941	0	0.319	4.04276e-158
C330006A16Rik	1.6266e-162	-0.460149	0	0.319	4.04276e-158
Pvrl2	1.6266e-162	-0.488488	0	0.319	4.04276e-158
Rpl19	7.92524e-162	0.63995	0.999	0.99	1.96974e-157
Toporsos	3.21981e-161	-0.448771	0	0.317	8.00252e-157
Mesdc2	6.35913e-160	-0.415911	0	0.314	1.5805e-155
2700029M09Rik	6.35913e-160	-0.423326	0	0.314	1.5805e-155
Cops9	8.75929e-157	0.972814	0.819	0	2.17703e-152
Hspa1a	1.52175e-155	-2.65496	0.243	0.808	3.78217e-151
Atn1.1	9.45976e-155	-0.369594	0	0.305	2.35113e-150
Ccdc53	9.45976e-155	-0.424166	0	0.305	2.35113e-150
Rpl35a	3.70588e-154	0.599659	0.999	0.983	9.2106e-150
Pvrl3	1.84739e-153	-0.395301	0	0.302	4.5915e-149
Marcks	3.71684e-153	1.17243	0.926	0.275	9.23784e-149
Itm2b	1.61152e-152	-0.848935	0.998	0.998	4.00526e-148
Deb1	3.59967e-152	-0.369444	0	0.3	8.94661e-148
Whsc1l1	3.59967e-152	-0.41288	0	0.3	8.94661e-148
Jpt1	1.35696e-151	1.17122	0.803	0	3.3726e-147
Glul	3.59316e-151	-1.4301	0.838	0.963	8.93043e-147
Gpx4	4.45669e-151	-1.10761	0.921	0.971	1.10767e-146
Mt2	1.36986e-150	-2.82246	0.887	0.98	3.40465e-146
Npm1	6.39982e-149	0.915829	0.99	0.774	1.59061e-144
Rfwd2	2.62745e-148	-0.344306	0	0.292	6.53026e-144
Eloc	7.46728e-148	0.976706	0.792	0	1.85592e-143
Gm11744	5.07398e-147	-0.449973	0	0.29	1.26109e-142
Rpl18	1.44004e-145	0.610146	1	0.971	3.57908e-141
Fth1	3.3959e-145	-0.78651	0.999	1	8.44018e-141
Rpl36	2.38572e-144	0.650461	0.999	0.975	5.92947e-140
Fbxo2	1.64519e-143	-1.12731	0.235	0.754	4.08896e-139
Hrsp12	6.90108e-142	-0.36419	0	0.28	1.7152e-137
Rplp1	1.05223e-141	0.619742	0.999	0.985	2.61521e-137
Nsa2	2.35554e-141	1.00831	0.939	0.361	5.85446e-137
Mt1	3.56992e-141	-2.40292	0.966	0.993	8.87268e-137
Rpl13-ps3	1.31793e-140	-0.34361	0	0.278	3.27558e-136
Utp11l	1.31793e-140	-0.380211	0	0.278	3.27558e-136
Fam63b	1.31793e-140	-0.410717	0	0.278	3.27558e-136
Ric8	2.51133e-139	-0.360527	0	0.275	6.24165e-135
Nop53	2.01344e-138	0.874512	0.763	0	5.00419e-134
0610009L18Rik	4.77475e-138	-0.338519	0	0.273	1.18672e-133
Rps16	1.45172e-137	0.558346	0.999	0.983	3.6081e-133
Hdgfrp3	9.05805e-137	-0.357759	0	0.27	2.25129e-132
Ncl	2.35662e-135	0.977124	0.977	0.661	5.85714e-131
Fdx1l	6.10273e-133	-0.336732	0	0.263	1.51677e-128
B2m	2.16227e-132	-1.26601	0.589	0.902	5.37411e-128
Ly6e	2.12143e-131	-1.09395	0.972	0.998	5.27259e-127
Tcim	2.58059e-131	1.18746	0.739	0	6.41379e-127
Naca	4.50046e-131	0.7103	0.995	0.877	1.11854e-126
Bhlhe41	5.52198e-131	-0.711921	0.027	0.381	1.37243e-126
Neat1	1.16478e-130	-1.57984	0.613	0.939	2.89494e-126
Gm12942	2.15306e-130	-0.379336	0	0.258	5.35123e-126
H2-D1	8.50293e-129	-1.29443	0.682	0.919	2.11332e-124
Dnajb1	6.10423e-128	-2.68691	0.464	0.838	1.51714e-123
Bre	7.5295e-128	-0.316295	0	0.253	1.87138e-123
Lrrc16a	7.5295e-128	-0.339744	0	0.253	1.87138e-123
Rpl24	1.70058e-127	0.559506	0.999	0.985	4.22661e-123
Fnbp1l	2.71238e-127	1.01076	0.966	0.514	6.74136e-123
Hiat1	1.40343e-126	-0.338834	0	0.251	3.48808e-122
Rpl13	3.34427e-126	0.508597	1	0.995	8.31185e-122
Rpl17	6.7646e-125	0.551088	1	0.988	1.68127e-120
Rplp2	1.41556e-124	0.511645	1	0.985	3.51824e-120
Snrpe	2.11594e-124	0.862063	0.959	0.501	5.25895e-120
Mest	2.73092e-123	1.09151	0.974	0.57	6.78743e-119
Hnrnpa1	4.90009e-123	0.769838	0.989	0.776	1.21787e-118
mt-Nd4l	1.13254e-122	0.907739	0.89	0.265	2.81481e-118
Rps12-ps3	2.05467e-122	-0.675616	0.084	0.511	5.10668e-118
2900097C17Rik	2.80758e-120	0.789854	0.702	0	6.97797e-116
Sat1	4.33527e-120	-1.50781	0.375	0.803	1.07749e-115
Maob	2.61746e-119	-0.521326	0.031	0.373	6.50544e-115
Erbin	7.95572e-117	0.805029	0.689	0	1.97731e-112
Timp3	2.2876e-116	-1.78288	0.673	0.892	5.6856e-112
Rps2	1.79746e-115	0.50879	0.999	0.975	4.4674e-111
Vim	1.91283e-114	1.17761	0.909	0.388	4.75416e-110
Rpl21	2.11486e-114	0.449944	1	0.995	5.25627e-110
Rps11	3.63724e-114	0.501325	0.999	0.983	9.03999e-110
Rpl7	2.63327e-113	0.522367	1	0.975	6.54473e-109
Cebpb	2.67909e-113	-1.53004	0.789	0.929	6.65861e-109
Nr1d1	1.15265e-112	-0.810113	0.103	0.523	2.86479e-108
Sfpq	5.22634e-112	0.86735	0.939	0.523	1.29896e-107
Ckb	1.06549e-111	-1.15083	0.538	0.885	2.64816e-107
Sptbn1	3.40866e-111	0.85725	0.978	0.668	8.47188e-107
Cavin1	5.3712e-110	0.838992	0.664	0	1.33496e-105
Rps4x	8.17871e-110	0.482732	0.999	0.98	2.03274e-105
Atrx	1.3453e-109	0.896282	0.921	0.44	3.34361e-105
Aldoc	6.70141e-109	-1.02665	0.905	0.98	1.66557e-104
Laptm4a	4.83017e-108	-0.748669	0.986	0.99	1.20049e-103
Hmgb1	6.24227e-108	0.751989	0.995	0.921	1.55145e-103
Pgk1	1.19871e-107	0.720539	0.683	0.029	2.97927e-103
Selenoh	2.43782e-107	0.815078	0.654	0	6.05896e-103
Mia	3.65833e-107	-1.28755	0.988	0.99	9.0924e-103
Eya4	2.52386e-106	0.789874	0.697	0.047	6.27281e-102
AC160336.1	3.80889e-106	1.07258	0.65	0	9.46662e-102
Mdk	5.23328e-106	0.873145	0.991	0.855	1.30068e-101
Fgf1	1.10022e-105	-0.467788	0.025	0.322	2.73448e-101
Prrc2c	1.165e-105	0.795206	0.939	0.506	2.8955e-101
Afdn	5.83417e-105	0.741804	0.645	0	1.45003e-100
Hmgb2	1.65355e-104	1.28012	0.894	0.398	4.10973e-100
Rpl35	2.41822e-104	0.700378	0.991	0.742	6.01025e-100
Spint2	6.96123e-103	-0.69503	0.98	0.983	1.73014e-98
Nasp	8.44047e-103	0.844124	0.809	0.184	2.09779e-98
Jund	1.15056e-102	-0.948263	0.995	0.988	2.8596e-98
Rps9	2.28198e-102	0.417702	1	0.995	5.67162e-98
Zdbf2	8.288e-102	1.1568	0.85	0.317	2.0599e-97
Lsm7	2.74503e-99	0.656201	0.714	0.096	6.82249e-95
Phlda1	1.05995e-98	-1.25852	0.245	0.666	2.6344e-94
Rpl37	2.44518e-98	0.465316	0.999	0.998	6.07724e-94
Hdgfl3	1.0908e-97	0.648771	0.616	0	2.71107e-93
Lars2	1.89023e-96	0.717708	0.644	0.029	4.69797e-92
Dbi	2.60028e-96	-1.06809	0.914	0.946	6.46273e-92
Ly6a	4.86142e-96	-0.931535	0.032	0.327	1.20826e-91
Rpl11	1.11382e-95	0.455961	0.999	0.966	2.76828e-91
Fmc1	5.26243e-95	0.650374	0.606	0	1.30792e-90
Nap1l1	1.3117e-94	0.805436	0.904	0.43	3.2601e-90
S100a16	2.46441e-93	-1.0129	0.659	0.85	6.12505e-89
Mettl26	3.92295e-93	0.602881	0.598	0	9.7501e-89
Hnrnpd	1.00263e-92	0.739015	0.887	0.413	2.49192e-88
Cd81	3.58371e-92	-0.824142	0.977	0.988	8.90696e-88
Rpl26	7.0337e-92	0.416325	1	0.988	1.74816e-87
Btbd7	1.07903e-91	0.651059	0.662	0.066	2.68181e-87
Mpp6	1.15989e-90	0.7794	0.725	0.172	2.88278e-86
Csrp2	1.90909e-90	0.868286	0.919	0.467	4.74486e-86
Hist1h2bc	2.26484e-90	-0.915217	0.329	0.749	5.62904e-86
Rabac1	3.98823e-90	-0.771367	0.846	0.894	9.91235e-86
Set	5.69241e-90	0.686372	0.957	0.614	1.41479e-85
Fam177a	9.33367e-90	-0.507897	0.046	0.351	2.31979e-85
Capns1	1.02399e-89	-0.823231	0.827	0.902	2.54502e-85
Ddx50	1.3694e-89	0.653753	0.841	0.31	3.40351e-85
Rpl7a	6.99045e-89	0.499192	0.997	0.904	1.73741e-84
Brd1	1.08264e-88	0.612408	0.665	0.081	2.69079e-84
Rpl10a	2.63765e-88	0.466209	0.999	0.963	6.55562e-84
Ftl1	6.63977e-88	-0.67743	1	0.995	1.65025e-83
Eif3c	9.01815e-88	0.672307	0.914	0.469	2.24137e-83
Bzw1	1.2765e-87	0.662291	0.928	0.45	3.17261e-83
Pbxip1	2.46666e-87	-0.902391	0.8	0.899	6.13064e-83
Cxcl1	4.93875e-87	-1.11033	0.026	0.29	1.22748e-82
Pcm1	1.54257e-86	0.729291	0.818	0.314	3.8339e-82
Arhgap5	4.01003e-86	0.710078	0.84	0.361	9.96654e-82
Ubc	5.04021e-86	-1.24889	0.974	0.993	1.25269e-81
Col12a1	8.07569e-86	0.803741	0.692	0.125	2.00713e-81
Slc15a2	1.3128e-85	-0.852161	0.286	0.671	3.26283e-81
Selenom	1.46409e-85	0.642691	0.566	0	3.63885e-81
Ppp4r3b	2.36142e-85	0.57613	0.565	0	5.86908e-81
Rpl37a	2.47829e-85	0.386772	1	0.998	6.15955e-81
Naxe	2.9982e-85	0.551267	0.564	0	7.45174e-81
Nsd3	9.86625e-85	0.569926	0.562	0	2.45216e-80
Ntrk2	1.14066e-84	-0.920006	0.319	0.695	2.83499e-80
Ccdc88c	1.95175e-84	0.631185	0.604	0.032	4.85087e-80
Nectin3	2.55041e-84	0.60283	0.56	0	6.33878e-80
Vps28	2.55041e-84	0.545015	0.56	0	6.33878e-80
Btf3	3.93857e-84	0.516191	0.99	0.85	9.78891e-80
Amd2	4.39519e-84	0.613997	0.565	0.007	1.09238e-79
Dlk1	4.96341e-84	1.50024	0.819	0.317	1.23361e-79
Rpl9	7.09884e-84	0.38832	0.999	0.995	1.76435e-79
Smc3	1.50515e-83	0.659574	0.768	0.243	3.74091e-79
Sparc	1.93208e-83	0.858563	0.698	0.155	4.80199e-79
Tmem176b	2.32574e-83	-0.751471	0.971	0.985	5.7804e-79
Fbn2	2.66194e-83	0.68875	0.586	0.029	6.61598e-79
Nsd1	3.45217e-83	0.664061	0.75	0.229	8.58003e-79
Anxa2	4.21733e-83	-0.894304	0.866	0.943	1.04817e-78
Ttc3	7.24208e-83	0.653631	0.954	0.649	1.79995e-78
Nbdy	1.39957e-82	0.554173	0.552	0	3.4785e-78
Aldoa	1.59779e-82	-0.75707	0.894	0.966	3.97114e-78
Kcnq1ot1	1.94417e-82	1.0622	0.828	0.398	4.83203e-78
2002-09-01	2.07647e-82	-0.73514	0.186	0.56	5.16086e-78
Rhoc	2.72851e-82	-0.747351	0.848	0.909	6.78144e-78
Rpl36a	7.11795e-82	0.451397	0.998	0.958	1.7691e-77
Prpf4b	7.96771e-82	0.67395	0.839	0.339	1.98029e-77
Ppib	9.58506e-82	0.541829	0.99	0.85	2.38227e-77
Naxd	1.14293e-81	0.546563	0.548	0	2.84064e-77
Ctsb	1.24223e-81	-0.79129	0.791	0.88	3.08744e-77
Npnt	1.51536e-81	0.782441	0.865	0.378	3.76626e-77
mt-Nd5	2.27697e-81	0.668188	0.966	0.681	5.65918e-77
Tmem176a	4.46813e-81	-0.882684	0.817	0.914	1.11051e-76
Usp29	8.42036e-81	0.79547	0.61	0.076	2.0928e-76
Cct2	1.53328e-80	0.598119	0.866	0.376	3.81081e-76
Mcrip1	1.83917e-80	0.545389	0.543	0	4.57107e-76
1110008P14Rik	2.22429e-80	-0.861986	0.278	0.644	5.52825e-76
Klhl24	4.84817e-80	0.608578	0.685	0.147	1.20496e-75
Atn1	2.2976e-79	0.530257	0.538	0	5.71046e-75
Hspa1b	3.81129e-79	-0.909652	0.16	0.543	9.47259e-75
Csdc2	4.59125e-79	-0.552524	0.077	0.398	1.14111e-74
Gm47283	1.13369e-78	0.646411	0.535	0	2.81768e-74
S100a1	1.35199e-78	-0.900787	0.61	0.83	3.36023e-74
Nsmce3	1.42309e-78	0.504959	0.534	0	3.53695e-74
Igfbp2	2.01509e-78	0.766663	0.868	0.376	5.00831e-74
Ccar1	2.18011e-78	0.61143	0.746	0.233	5.41845e-74
Cavin3	2.24123e-78	0.601448	0.533	0	5.57036e-74
Fbxl7	6.21517e-78	0.610182	0.535	0.002	1.54472e-73
Ppp4r3a	1.29612e-76	0.517156	0.525	0	3.22137e-72
Zfp266	1.77127e-76	0.552106	0.658	0.128	4.40232e-72
Nsd2	3.16987e-76	0.578312	0.523	0	7.87839e-72
Uba52	1.0545e-75	0.581702	0.897	0.415	2.62085e-71
Snrpg	1.97802e-75	0.577606	0.97	0.661	4.91618e-71
Igfbp5	9.33045e-75	-1.17948	0.927	0.931	2.31899e-70
Bclaf1	1.0316e-74	0.635813	0.814	0.349	2.56393e-70
Eif4a2	1.09552e-74	-0.690194	0.833	0.894	2.72279e-70
Sdc4	1.29232e-74	-1.14995	0.887	0.916	3.21193e-70
Hnrnpab	1.63419e-74	0.62068	0.942	0.595	4.06161e-70
Apoe	3.84565e-74	-1.49189	0.544	0.781	9.55797e-70
Hnrnpu	5.85702e-74	0.646043	0.945	0.658	1.4557e-69
Atp1a1	1.0546e-73	-0.628882	0.959	0.963	2.62111e-69
Rock2	1.74941e-73	0.668438	0.72	0.216	4.34799e-69
Pdap1	2.21536e-73	0.577882	0.879	0.455	5.50605e-69
Atp5g3	4.42878e-73	0.588111	0.929	0.57	1.10073e-68
Selenos	7.0892e-73	0.529303	0.507	0	1.76195e-68
Prdx2	7.642e-72	0.514851	0.994	0.865	1.89934e-67
Hpf1	7.68047e-72	0.513858	0.502	0	1.9089e-67
Ndufaf8	9.52882e-72	0.507975	0.502	0	2.36829e-67
Erg28	2.79414e-71	0.475159	0.5	0	6.94455e-67
Myh10	3.87524e-71	0.657856	0.703	0.209	9.63153e-67
Cop1	8.16048e-71	0.497265	0.497	0	2.0282e-66
Smim3	8.94184e-71	-0.827864	0.216	0.57	2.22241e-66
Slc38a2	1.22485e-70	0.654421	0.902	0.464	3.04424e-66
H2afz	3.29609e-70	0.809322	0.98	0.838	8.19211e-66
Sfrp5	3.30968e-70	-0.845885	0.121	0.452	8.22589e-66
Tug1	4.49632e-70	0.492251	0.494	0	1.11751e-65
Utp11	4.49632e-70	0.483492	0.494	0	1.11751e-65
Fxr1	4.90376e-70	0.558042	0.744	0.263	1.21878e-65
Ybx3	1.12295e-69	0.559859	0.828	0.332	2.79097e-65
Snrpf	1.78094e-69	0.566942	0.955	0.634	4.42636e-65
Cenpx	3.02943e-69	0.501311	0.49	0	7.52935e-65
Hspa8	1.00102e-68	-0.781031	0.998	0.993	2.48793e-64
Nrep	1.01311e-68	0.565573	0.614	0.108	2.51799e-64
Xrn2	1.48448e-68	0.558058	0.678	0.182	3.68953e-64
mt-Atp8	2.02179e-68	0.561498	0.668	0.16	5.02496e-64
Rps5	2.30419e-68	0.33437	0.999	1	5.72683e-64
Fzd3	3.00714e-68	0.612134	0.844	0.408	7.47394e-64
Emb	4.22093e-68	-0.875594	0.562	0.789	1.04907e-63
Ascc3	5.77584e-68	0.563723	0.601	0.106	1.43553e-63
Col6a3	1.00505e-67	0.650241	0.613	0.113	2.49794e-63
Scaf11	2.0529e-67	0.566741	0.74	0.265	5.10229e-63
Rbpms	3.00962e-67	0.495111	0.995	0.951	7.4801e-63
Smim27	4.6093e-67	0.480945	0.479	0	1.14559e-62
Col4a1	4.75459e-67	0.599937	0.772	0.287	1.18171e-62
Zim1	5.1922e-67	0.69515	0.512	0.032	1.29047e-62
Reep5	9.32601e-67	-0.6649	0.748	0.843	2.31789e-62
Ddx6	1.05908e-66	0.568503	0.803	0.354	2.63225e-62
Paxx	1.29826e-66	0.464079	0.476	0	3.2267e-62
Junb	1.492e-66	-1.2977	0.856	0.941	3.70822e-62
Fbln2	1.73004e-66	0.658862	0.491	0.015	4.29985e-62
Zfp445	3.04558e-66	0.472839	0.482	0.005	7.5695e-62
Prrx1	4.09384e-66	0.686941	0.792	0.329	1.01748e-61
Gpc3	4.13839e-66	0.596397	0.665	0.167	1.02855e-61
Tpr	4.42433e-66	0.603926	0.84	0.45	1.09962e-61
Vat1	5.38712e-66	-0.504046	0.096	0.398	1.33892e-61
Rps3	6.69483e-66	0.360448	0.999	0.98	1.66393e-61
Hmgn5	7.14966e-66	0.759225	0.712	0.243	1.77698e-61
Dmxl1	2.23882e-65	0.624925	0.701	0.231	5.56437e-61
Atp5g2	2.40444e-65	0.499626	0.987	0.774	5.97599e-61
Cox7c	3.33867e-65	0.448112	0.993	0.882	8.29793e-61
Taf1d	3.36436e-65	0.519878	0.679	0.174	8.36178e-61
Acot1	3.70417e-65	0.580884	0.867	0.425	9.20634e-61
Supt16	5.00346e-65	0.514824	0.685	0.174	1.24356e-60
Eif3a	5.61287e-65	0.584812	0.889	0.514	1.39502e-60
Mrpl58	1.18107e-64	0.429872	0.466	0	2.93543e-60
Rpl27	1.676e-64	0.436028	0.994	0.912	4.16554e-60
Mat2a	3.39338e-64	-1.19247	0.779	0.84	8.4339e-60
Phf3	3.99453e-64	0.53572	0.759	0.292	9.92801e-60
Cbx3	4.54014e-64	0.549148	0.905	0.467	1.12841e-59
Yy1	4.59071e-64	0.525342	0.762	0.283	1.14097e-59
Itgb1	4.78175e-64	0.557759	0.93	0.568	1.18846e-59
H2-K1	4.91996e-64	-0.9108	0.653	0.821	1.22281e-59
Dhx9	7.92427e-64	0.551057	0.674	0.214	1.9695e-59
Nup98	8.228e-64	0.461172	0.557	0.071	2.04499e-59
Snrnp70	9.93898e-64	0.515541	0.89	0.504	2.47024e-59
Stmn1	1.38961e-63	1.08979	0.873	0.472	3.45373e-59
Uqcrh	1.61257e-63	0.436417	0.993	0.885	4.00788e-59
Nectin2	2.00514e-63	0.456804	0.46	0	4.98357e-59
Igsf9b	2.96624e-63	0.51279	0.471	0.01	7.3723e-59
Hikeshi	2.9977e-63	0.441215	0.459	0	7.45049e-59
Rbm3	3.06507e-63	0.542826	0.977	0.791	7.61792e-59
Aldh2	3.57789e-63	-0.825744	0.669	0.821	8.8925e-59
Nkain3	3.82689e-63	0.576092	0.572	0.093	9.51134e-59
Chd6	5.49414e-63	0.538794	0.747	0.3	1.36551e-58
Eif3m	6.54683e-63	0.496784	0.89	0.459	1.62715e-58
Tcea1	6.69608e-63	0.507644	0.771	0.297	1.66424e-58
Rps18	8.49805e-63	0.336348	0.999	0.99	2.1121e-58
Epcam	9.94209e-63	0.468212	0.992	0.973	2.47101e-58
Cox6a1	1.21505e-62	-0.630582	0.871	0.907	3.01988e-58
Thrap3	1.38931e-62	0.548418	0.783	0.339	3.453e-58
Sox11	1.40235e-62	0.611714	0.786	0.327	3.48541e-58
Rex1bd	1.8174e-62	0.438606	0.455	0	4.51697e-58
Aaed1	2.02866e-62	0.465274	0.514	0.047	5.04203e-58
Mex3a	2.32207e-62	0.505296	0.535	0.076	5.77128e-58
Prdx1	2.36052e-62	-0.823125	0.989	0.995	5.86683e-58
Ints6	6.19561e-62	0.478246	0.491	0.029	1.53986e-57
Csnk2a2	7.59242e-62	0.455003	0.496	0.037	1.88702e-57
Gpatch8	7.76094e-62	0.498462	0.696	0.229	1.92891e-57
Ppp2r2b	8.05688e-62	0.609709	0.864	0.472	2.00246e-57
Sf3b3	1.02147e-61	0.487157	0.628	0.157	2.53875e-57
Selenot	1.61767e-61	0.417891	0.45	0	4.02055e-57
Ywhaz	2.32066e-61	0.509568	0.974	0.698	5.76777e-57
Cops5	2.44057e-61	0.456788	0.738	0.26	6.06578e-57
Tmsb10	2.671e-61	0.46722	0.997	0.926	6.6385e-57
Wfdc2	4.05068e-61	0.648836	0.898	0.499	1.00676e-56
Ppic	4.23547e-61	0.472778	0.594	0.111	1.05268e-56
Ssb	7.10097e-61	0.516898	0.891	0.499	1.76487e-56
Eif3e	7.18101e-61	0.502522	0.936	0.582	1.78477e-56
Kmt5a	7.84298e-61	0.443559	0.446	0	1.94929e-56
Nfib	8.03077e-61	0.546433	0.971	0.735	1.99597e-56
Golm1	1.74004e-60	0.495278	0.61	0.128	4.32469e-56
Basp1	1.76352e-60	0.677385	0.883	0.474	4.38306e-56
Mgst1	2.53993e-60	-0.86787	0.747	0.845	6.31275e-56
Retreg2	2.54671e-60	0.408658	0.444	0	6.32959e-56
Rbm25	2.83771e-60	0.542114	0.904	0.536	7.05285e-56
Bzw2	2.99496e-60	0.469658	0.564	0.098	7.44368e-56
Rps23	3.37885e-60	0.319436	1	0.99	8.39779e-56
Serbp1	3.77588e-60	0.455479	0.979	0.813	9.38457e-56
Ppp1r15a	6.99398e-60	-1.2192	0.655	0.789	1.73828e-55
Ceacam1	8.74822e-60	-0.648222	0.042	0.273	2.17428e-55
Rida	1.21451e-59	0.407061	0.44	0	3.01854e-55
Pde10a	1.32313e-59	0.664155	0.753	0.307	3.28851e-55
Phf14	1.87291e-59	0.494868	0.672	0.206	4.65494e-55
Ktn1	2.72265e-59	0.519624	0.838	0.43	6.76687e-55
2010107E04Rik	3.20416e-59	0.501349	0.965	0.654	7.96362e-55
Dscam	3.38771e-59	0.556802	0.62	0.152	8.41982e-55
Kdm1a	4.29177e-59	0.486833	0.676	0.231	1.06668e-54
Smarca5	4.92718e-59	0.529092	0.868	0.477	1.2246e-54
Zfp638	8.26167e-59	0.493534	0.641	0.192	2.05335e-54
Ppp1r10	8.81004e-59	0.500918	0.673	0.233	2.18965e-54
Mesd	1.0247e-58	0.416953	0.435	0	2.5468e-54
Rb1cc1	1.66492e-58	0.489704	0.644	0.184	4.13799e-54
Heca	1.76747e-58	0.457529	0.495	0.047	4.39287e-54
Zcchc11	2.00526e-58	0.512061	0.652	0.214	4.98387e-54
Lmo4	1.72109e-57	0.557082	0.97	0.737	4.2776e-53
Gm17018	2.6731e-57	0.402806	0.427	0	6.64372e-53
Gabarap	2.7641e-57	-0.506979	0.972	0.946	6.86989e-53
Pde5a	2.86903e-57	0.561279	0.636	0.192	7.1307e-53
Bmt2	3.23423e-57	0.426259	0.427	0	8.03836e-53
Tagln	3.85908e-57	1.52075	0.531	0.101	9.59136e-53
Tax1bp1	5.38596e-57	0.524478	0.912	0.575	1.33863e-52
Mlf2	5.70757e-57	-0.608468	0.795	0.826	1.41856e-52
Hsp90ab1	5.7774e-57	0.302869	0.999	0.995	1.43592e-52
Eif4ebp2	6.50495e-57	0.426559	0.499	0.057	1.61674e-52
Dhx36	9.65008e-57	0.458897	0.703	0.241	2.39843e-52
H1fx	1.29047e-56	0.681828	0.529	0.088	3.20733e-52
Macc1	1.33923e-56	0.574427	0.532	0.093	3.32853e-52
Prpf40a	1.41097e-56	0.484763	0.798	0.408	3.50681e-52
Rpl8	2.01244e-56	0.312033	1	0.985	5.00171e-52
Knop1	2.01713e-56	0.482258	0.648	0.199	5.01338e-52
Rtf2	2.15734e-56	0.388232	0.422	0	5.36186e-52
Syncrip	2.23118e-56	0.482686	0.784	0.346	5.54537e-52
Nipbl	3.12965e-56	0.490934	0.784	0.351	7.77843e-52
Chd4	5.11637e-56	0.542558	0.839	0.457	1.27162e-51
Psip1	7.84223e-56	0.54996	0.787	0.381	1.94911e-51
Hectd1	7.91533e-56	0.461154	0.828	0.393	1.96728e-51
Mia2	9.74515e-56	0.403707	0.419	0	2.42206e-51
Sfn	1.15404e-55	-1.98463	0.303	0.604	2.86825e-51
Atp5e	1.21376e-55	0.402149	0.994	0.892	3.01668e-51
Smad4	2.21245e-55	0.436075	0.665	0.219	5.49882e-51
Anp32b	2.32673e-55	0.548841	0.875	0.511	5.78286e-51
Chd2	2.61326e-55	0.523458	0.751	0.317	6.49499e-51
Cd151	3.16129e-55	-0.719856	0.47	0.705	7.85707e-51
Cul3	3.23171e-55	0.442674	0.701	0.258	8.0321e-51
Snx6	3.98241e-55	0.427215	0.689	0.224	9.89788e-51
Gas6	4.33395e-55	-0.724504	0.328	0.617	1.07716e-50
Nrcam	4.68389e-55	0.579177	0.829	0.45	1.16413e-50
Ctsz	4.70576e-55	-0.683901	0.805	0.83	1.16957e-50
Hmcn1	7.90756e-55	0.431846	0.459	0.034	1.96534e-50
Hnrnpm	7.98963e-55	0.493305	0.843	0.435	1.98574e-50
Retreg1	9.19881e-55	0.416345	0.413	0	2.28627e-50
Emp1	1.09471e-54	-1.13094	0.46	0.713	2.7208e-50
Zfp91	1.28872e-54	0.478311	0.747	0.322	3.20298e-50
Smarce1	1.52758e-54	0.444658	0.721	0.27	3.79664e-50
Arl4d	1.94172e-54	-0.948899	0.173	0.469	4.82595e-50
Thap12	2.33006e-54	0.389213	0.411	0	5.79112e-50
Slc16a11	3.93974e-54	-0.731154	0.288	0.58	9.79182e-50
Gm26735	4.16574e-54	0.434995	0.429	0.012	1.03535e-49
Thrsp	6.37389e-54	-0.556087	0.088	0.349	1.58417e-49
Khdrbs1	6.57328e-54	0.479508	0.81	0.398	1.63372e-49
Luc7l3	7.80448e-54	0.479316	0.791	0.373	1.93972e-49
Ccdc88a	8.45488e-54	0.515495	0.596	0.165	2.10138e-49
Kif21a	8.78196e-54	0.499128	0.681	0.243	2.18267e-49
Ptp4a1	1.25437e-53	-0.906938	0.889	0.912	3.11762e-49
Ier2	1.32275e-53	-1.35081	0.793	0.882	3.28756e-49
Col4a2	1.50841e-53	0.426168	0.55	0.106	3.749e-49
Atp1b1	1.70476e-53	-0.63952	0.974	0.988	4.237e-49
Gstt1	1.88754e-53	-0.767545	0.414	0.678	4.69128e-49
Csmd1	1.94091e-53	0.436392	0.417	0.01	4.82395e-49
Dek	2.20849e-53	0.607246	0.876	0.538	5.48898e-49
Atp6v1g1	2.24336e-53	-0.537342	0.907	0.88	5.57564e-49
Enho	2.67863e-53	-0.686128	0.19	0.491	6.65747e-49
Khdrbs3	3.08995e-53	0.446532	0.639	0.211	7.67977e-49
Hnrnpa2b1	3.37263e-53	0.430573	0.988	0.87	8.38234e-49
Rpl9-ps6	4.38653e-53	-0.61668	0.214	0.514	1.09023e-48
Kmt5b	4.45488e-53	0.388545	0.404	0	1.10722e-48
Dmac1	6.42594e-53	0.369496	0.403	0	1.5971e-48
Hnrnpa3	6.72523e-53	0.523165	0.956	0.757	1.67149e-48
Acin1	8.05778e-53	0.465961	0.789	0.383	2.00268e-48
Rpl10-ps3	8.50989e-53	0.423328	0.612	0.182	2.11505e-48
Washc3	9.264e-53	0.374979	0.402	0	2.30247e-48
Atp2b1	9.51234e-53	0.535828	0.891	0.531	2.3642e-48
Epb41l4aos	2.01817e-52	0.449808	0.545	0.118	5.01596e-48
Fkbp3	2.35663e-52	0.474471	0.879	0.511	5.85716e-48
Arf6	2.38068e-52	-0.807642	0.465	0.69	5.91694e-48
Atp5f1	6.58549e-52	0.444073	0.957	0.678	1.63676e-47
Srxn1	1.2216e-51	-1.19735	0.273	0.575	3.03616e-47
Pbrm1	1.396e-51	0.497038	0.865	0.509	3.46961e-47
Cd9	1.9714e-51	-0.749536	0.944	0.941	4.89971e-47
Gsdme	2.03004e-51	0.401574	0.394	0	5.04546e-47
Aqp3	2.34333e-51	-0.801181	0.122	0.393	5.82411e-47
Washc2	2.43129e-51	0.383711	0.394	0	6.04272e-47
Lmod1	2.56518e-51	0.629629	0.474	0.061	6.37551e-47
Jmy	2.7515e-51	0.506723	0.589	0.155	6.83858e-47
Egr3	3.83661e-51	0.651917	0.403	0.01	9.53552e-47
Myh9	4.2836e-51	0.507895	0.8	0.366	1.06465e-46
Lmnb1	6.05989e-51	0.525	0.55	0.133	1.50612e-46
Degs2	6.3456e-51	-0.399315	0.072	0.314	1.57713e-46
Usp51	7.71788e-51	0.620821	0.466	0.064	1.9182e-46
Senp6	1.11333e-50	0.437605	0.863	0.459	2.76708e-46
Cebpz	1.66923e-50	0.410005	0.606	0.174	4.14871e-46
Casp3	1.93385e-50	0.39937	0.413	0.017	4.8064e-46
Gnb5	2.09522e-50	0.352617	0.388	0	5.20745e-46
Mbd2	2.35075e-50	0.417711	0.65	0.229	5.84254e-46
Selenop	2.50494e-50	0.399778	0.388	0	6.22578e-46
Tmbim1	4.13767e-50	-0.796401	0.289	0.565	1.02838e-45
Pak2	4.34357e-50	0.441869	0.828	0.413	1.07955e-45
Crebzf	4.87161e-50	0.361006	0.549	0.12	1.21079e-45
Rbm5	4.89835e-50	0.437329	0.692	0.268	1.21744e-45
Gspt1	7.21071e-50	0.401364	0.646	0.226	1.79215e-45
Rock1	8.14311e-50	0.478683	0.705	0.292	2.02389e-45
Ptma	8.49035e-50	0.3468	1	0.988	2.11019e-45
H2afy2	9.29946e-50	0.392074	0.644	0.209	2.31129e-45
Top2b	9.72895e-50	0.453104	0.711	0.312	2.41803e-45
Rif1	1.23933e-49	0.455355	0.52	0.115	3.08022e-45
Slf2	1.48346e-49	0.399424	0.383	0	3.68698e-45
Hsph1	1.62875e-49	-0.871421	0.338	0.597	4.04811e-45
Rsf1	1.76188e-49	0.478118	0.627	0.216	4.37898e-45
Lsm12	1.96468e-49	0.4077	0.72	0.287	4.88302e-45
Shisa5	2.14425e-49	-0.644992	0.348	0.617	5.32933e-45
Arid4b	2.71447e-49	0.476968	0.749	0.351	6.74653e-45
Pmepa1	3.23961e-49	0.556923	0.644	0.229	8.05174e-45
Gkap1	3.39518e-49	0.423698	0.677	0.241	8.43838e-45
Serf1	4.11319e-49	0.430235	0.645	0.224	1.02229e-44
Tmbim6	4.40643e-49	-0.531746	0.94	0.956	1.09517e-44
Cdc40	4.98541e-49	0.382406	0.508	0.088	1.23907e-44
Pmp22	4.99723e-49	-0.70773	0.279	0.577	1.24201e-44
Ppp1r14b	5.30836e-49	0.479739	0.899	0.486	1.31934e-44
Crym	8.98051e-49	0.536461	0.623	0.211	2.23202e-44
Fubp1	9.66611e-49	0.453853	0.85	0.489	2.40241e-44
Stag1	1.12072e-48	0.45963	0.599	0.197	2.78543e-44
Id2	1.1268e-48	-1.04073	0.266	0.553	2.80055e-44
Stox2	1.52296e-48	0.494975	0.747	0.332	3.78517e-44
Top1	1.85559e-48	0.445737	0.934	0.634	4.61187e-44
Tnrc6b	2.33472e-48	0.452819	0.775	0.383	5.80271e-44
Timm8a1	3.67105e-48	0.346192	0.384	0.005	9.12402e-44
Itm2c	4.41466e-48	-0.527418	0.909	0.897	1.09722e-43
Idh2	4.5697e-48	0.43822	0.783	0.356	1.13575e-43
Plekhb1	4.95332e-48	-0.680698	0.505	0.698	1.2311e-43
Akap9	5.11075e-48	0.471736	0.785	0.383	1.27022e-43
Rnd1	9.13013e-48	-0.889718	0.115	0.373	2.2692e-43
Smarcc1	1.11725e-47	0.408445	0.679	0.253	2.77681e-43
Eif5a	2.07134e-47	-0.792747	0.965	0.936	5.14811e-43
Flvcr1	2.39232e-47	0.430379	0.37	0	5.94588e-43
Anxa5	2.43047e-47	-0.54257	0.916	0.924	6.0407e-43
Mfsd14a	2.84502e-47	0.332605	0.369	0	7.07101e-43
Smim14	3.16867e-47	-0.600995	0.645	0.769	7.87542e-43
Hmgn2	6.12038e-47	0.520443	0.867	0.511	1.52116e-42
Cbx1	6.23432e-47	0.415037	0.837	0.435	1.54948e-42
Acadl	9.91661e-47	0.419114	0.753	0.334	2.46467e-42
Parp1	1.08607e-46	0.395832	0.524	0.12	2.69932e-42
Aqp4	1.20728e-46	-0.455781	0.1	0.351	3.00058e-42
Nrip1	1.33764e-46	0.492769	0.815	0.4	3.32458e-42
Zfp644	1.36262e-46	0.458094	0.829	0.442	3.38665e-42
Hp1bp3	1.54118e-46	0.423083	0.773	0.393	3.83044e-42
Gm45716	1.59817e-46	0.365992	0.365	0	3.97209e-42
1810022K09Rik	1.75382e-46	0.368691	0.742	0.307	4.35894e-42
Perp	3.53304e-46	-0.671158	0.369	0.619	8.78101e-42
Erh	4.31602e-46	-0.657036	0.465	0.671	1.0727e-41
Brwd3	6.07313e-46	0.515556	0.465	0.079	1.50942e-41
H2afv	1.10651e-45	0.598234	0.947	0.656	2.75012e-41
Pnn	1.2723e-45	0.458361	0.789	0.408	3.16218e-41
Lnpep	1.33476e-45	0.351787	0.427	0.044	3.31742e-41
Hnrnpr	1.35454e-45	0.429068	0.795	0.415	3.36657e-41
Myl12b	1.53112e-45	0.412212	0.958	0.693	3.80545e-41
Cct8	2.13226e-45	0.359732	0.794	0.398	5.29953e-41
Ppm1a	2.22098e-45	0.397051	0.726	0.329	5.52003e-41
Rlf	2.34144e-45	0.372822	0.465	0.079	5.8194e-41
Prnp	3.91531e-45	-0.611581	0.734	0.833	9.73112e-41
Vamp8	4.99052e-45	-0.582829	0.736	0.784	1.24034e-40
Pkm	5.95114e-45	-0.572868	0.946	0.946	1.4791e-40
Col11a1	6.8987e-45	0.425476	0.566	0.165	1.7146e-40
Luzp1	9.08113e-45	0.384921	0.601	0.194	2.25702e-40
mt-Atp6	9.25891e-45	0.254959	0.999	1	2.30121e-40
BC005561	1.01808e-44	0.401779	0.767	0.332	2.53033e-40
Hadha	1.07983e-44	0.392645	0.698	0.285	2.68382e-40
Rps25	1.29267e-44	0.284622	0.997	0.975	3.21279e-40
Ubap2	1.38978e-44	0.378121	0.576	0.174	3.45415e-40
Fam92a	1.46091e-44	0.369909	0.631	0.226	3.63094e-40
F2rl1	1.56212e-44	0.542754	0.699	0.287	3.8825e-40
Fam60a	1.98785e-44	0.388398	0.707	0.287	4.94059e-40
Hk2	2.09458e-44	-0.497173	0.094	0.334	5.20587e-40
Cdkn1c	2.57165e-44	0.328006	0.828	0.41	6.39158e-40
Ranbp2	2.76518e-44	0.402571	0.537	0.155	6.87258e-40
Bod1l	3.39651e-44	0.439041	0.668	0.283	8.44168e-40
Fam98b	4.76773e-44	0.366555	0.54	0.143	1.18497e-39
Rps27	5.00107e-44	0.27056	0.999	0.993	1.24297e-39
Cst3	5.06334e-44	-0.589989	0.967	0.921	1.25844e-39
Zfp326	5.31411e-44	0.40738	0.72	0.337	1.32077e-39
Rps19	6.59917e-44	0.264742	0.999	0.995	1.64016e-39
Tmem9b	9.04533e-44	-0.535017	0.177	0.445	2.24813e-39
Hspa4	1.08268e-43	0.384391	0.737	0.349	2.69089e-39
Tnrc18	1.09968e-43	0.400446	0.636	0.233	2.73313e-39
Map4k4	1.16969e-43	0.381138	0.705	0.312	2.90715e-39
Ctsd	1.3804e-43	-0.648397	0.73	0.791	3.43084e-39
Nqo1	1.72311e-43	-0.382167	0.067	0.283	4.28262e-39
Tpm1	1.83099e-43	0.503776	0.979	0.791	4.55075e-39
Eef1akmt2	1.95301e-43	0.316632	0.346	0	4.85401e-39
Nme7	1.98273e-43	0.372706	0.439	0.066	4.92789e-39
Cux1	2.34437e-43	0.407428	0.791	0.41	5.8267e-39
Virma	5.29409e-43	0.302352	0.343	0	1.31579e-38
Matr3	5.54172e-43	0.419867	0.864	0.506	1.37734e-38
Ddx46	5.66254e-43	0.373241	0.627	0.233	1.40737e-38
Tfdp1	6.20078e-43	0.32417	0.348	0.005	1.54114e-38
Copb2	8.00825e-43	0.371327	0.739	0.342	1.99037e-38
Tnrc6c	8.21418e-43	0.388895	0.72	0.314	2.04155e-38
Cabcoco1	8.70164e-43	0.320939	0.342	0	2.1627e-38
Gnas	8.70379e-43	0.382991	1	0.998	2.16324e-38
Zfp664	8.89071e-43	0.385605	0.8	0.41	2.2097e-38
Col18a1	1.19544e-42	0.396266	0.65	0.243	2.97113e-38
Ss18l2	1.21116e-42	0.306554	0.341	0	3.01023e-38
Srsf10	1.41959e-42	0.399885	0.81	0.459	3.52826e-38
Esd	1.55695e-42	0.363393	0.852	0.462	3.86964e-38
Ssr2	1.71129e-42	0.359278	0.877	0.469	4.25325e-38
Sox2	2.02821e-42	0.591793	0.926	0.698	5.04092e-38
Cspp1	2.21895e-42	0.365084	0.56	0.174	5.51499e-38
Ctnnb1	2.54699e-42	0.41928	0.934	0.641	6.3303e-38
Cd2ap	3.72527e-42	0.383067	0.761	0.364	9.2588e-38
Hnrnpf	3.82604e-42	0.379009	0.974	0.791	9.50924e-38
Cdc37l1	3.86797e-42	0.348037	0.54	0.155	9.61346e-38
Fosb	5.10927e-42	-0.932284	0.8	0.838	1.26986e-37
Smarca2	6.369e-42	0.423141	0.821	0.452	1.58295e-37
Nfia	7.19815e-42	0.297544	0.986	0.85	1.78903e-37
Zranb2	7.29994e-42	0.386651	0.725	0.337	1.81433e-37
Reep3	7.61762e-42	0.402378	0.674	0.29	1.89328e-37
Kdm5b	7.89337e-42	0.445467	0.789	0.42	1.96182e-37
Lrig3	8.56133e-42	0.360907	0.445	0.074	2.12783e-37
Psmc6	9.55011e-42	0.355076	0.7	0.302	2.37359e-37
Nell2	1.04445e-41	0.400527	0.366	0.027	2.59589e-37
Snrpd2	1.19002e-41	0.390991	0.952	0.676	2.95767e-37
Arpc1b	1.28709e-41	-0.659915	0.53	0.705	3.19893e-37
Rest	1.37847e-41	0.398297	0.604	0.204	3.42606e-37
Clstn1	1.38444e-41	-0.638941	0.589	0.7	3.44088e-37
Nufip2	1.72559e-41	0.384014	0.685	0.295	4.28879e-37
Lman1	1.89973e-41	0.353759	0.823	0.45	4.72159e-37
Nol7	1.90326e-41	0.394568	0.859	0.533	4.73036e-37
Abraxas2	2.73327e-41	0.280411	0.332	0	6.79327e-37
Brd3	2.84928e-41	0.376745	0.622	0.251	7.08161e-37
Cyb561	2.90441e-41	-0.556342	0.266	0.523	7.21861e-37
Eny2	3.20593e-41	0.371541	0.798	0.435	7.96801e-37
Cdc5l	3.4089e-41	0.352437	0.564	0.184	8.47249e-37
Pdcd4	3.68871e-41	0.354562	0.871	0.506	9.16791e-37
Hacd4	3.85263e-41	0.384712	0.468	0.096	9.57533e-37
Eif2s2	4.2884e-41	0.398754	0.948	0.705	1.06584e-36
Ubb	4.61057e-41	-0.521172	0.994	0.998	1.14591e-36
Eml4	6.08847e-41	0.401175	0.59	0.206	1.51323e-36
Sfr1	1.24371e-40	0.402771	0.887	0.563	3.09111e-36
Ptprd	1.45705e-40	0.408455	0.644	0.268	3.62136e-36
Hsp90b1	1.59116e-40	0.442006	0.956	0.722	3.95467e-36
Pafah1b1	1.83703e-40	0.383297	0.884	0.558	4.56575e-36
Rictor	1.97085e-40	0.364227	0.441	0.086	4.89835e-36
Eppk1	2.2472e-40	0.376559	0.326	0	5.5852e-36
Fam91a1	2.2472e-40	0.290409	0.326	0	5.5852e-36
Tjp1	2.50482e-40	0.381894	0.592	0.216	6.22548e-36
Tcf4	2.62281e-40	0.452938	0.922	0.656	6.51872e-36
Esf1	2.92598e-40	0.349389	0.552	0.187	7.27224e-36
Mosmo	3.10178e-40	0.286389	0.325	0	7.70917e-36
Syt1	3.15163e-40	0.460517	0.46	0.098	7.83306e-36
Crebbp	3.25567e-40	0.380282	0.758	0.369	8.09165e-36
Mpped2	3.27503e-40	0.361146	0.581	0.194	8.13975e-36
Rbbp4	3.88337e-40	0.364939	0.754	0.388	9.65172e-36
Snw1	7.65925e-40	0.359744	0.728	0.361	1.90363e-35
Cd74	8.43479e-40	-0.763997	0.21	0.489	2.09638e-35
Nenf	8.49767e-40	-0.509538	0.818	0.826	2.11201e-35
Aimp1	8.68004e-40	0.357604	0.716	0.332	2.15734e-35
U2surp	1.14975e-39	0.344436	0.754	0.391	2.85759e-35
Smc1a	1.15421e-39	0.401131	0.69	0.319	2.86868e-35
Tab2	1.19277e-39	0.381041	0.6	0.241	2.96452e-35
Rhobtb3	1.21708e-39	0.318289	0.414	0.061	3.02494e-35
Mal	1.26195e-39	-0.317236	0.066	0.27	3.13644e-35
Zmynd11	1.36537e-39	0.376391	0.715	0.332	3.3935e-35
Wwc2	1.4686e-39	0.351026	0.524	0.15	3.65005e-35
Zfp704	1.71024e-39	0.371877	0.564	0.189	4.25062e-35
Ezh2	2.00726e-39	0.380557	0.429	0.074	4.98884e-35
Utp14b	2.31559e-39	0.463067	0.577	0.199	5.75517e-35
Suz12	2.62158e-39	0.360966	0.495	0.14	6.51567e-35
Rbpj	3.15546e-39	0.334978	0.58	0.204	7.84259e-35
Usp34	3.73586e-39	0.397585	0.707	0.349	9.2851e-35
Srek1	3.81291e-39	0.346426	0.612	0.233	9.47661e-35
Ubap2l	4.39033e-39	0.367353	0.77	0.391	1.09117e-34
Slc3a2	4.8017e-39	-0.671239	0.759	0.823	1.19342e-34
Efnb2	4.88887e-39	0.446902	0.745	0.391	1.21508e-34
Fzd2	5.57104e-39	0.374741	0.425	0.074	1.38463e-34
Eid1	6.22048e-39	0.405413	0.875	0.531	1.54604e-34
Zfp608	6.46971e-39	0.412114	0.549	0.184	1.60798e-34
Rab21	7.31432e-39	0.310265	0.533	0.16	1.8179e-34
Adgrl3	7.35697e-39	0.341202	0.567	0.192	1.8285e-34
Rdx	7.83702e-39	0.392151	0.891	0.57	1.94781e-34
Hook3	1.21581e-38	0.364813	0.519	0.174	3.02178e-34
Dbp	1.41251e-38	-0.557873	0.179	0.43	3.51065e-34
Cited4	1.50727e-38	-0.613667	0.157	0.4	3.74616e-34
N4bp1	1.6557e-38	0.338238	0.53	0.17	4.11508e-34
Cnot6l	1.66217e-38	0.334219	0.56	0.177	4.13117e-34
Plpbp	1.67319e-38	0.274045	0.314	0	4.15854e-34
Hmgb3	2.4203e-38	0.381738	0.753	0.371	6.01541e-34
Slk	2.49016e-38	0.354252	0.483	0.123	6.18905e-34
Zcchc6	2.88676e-38	0.344443	0.503	0.15	7.17475e-34
Actg1	2.99131e-38	-0.460715	0.999	0.995	7.4346e-34
Tnks	3.10393e-38	0.28337	0.349	0.027	7.71452e-34
Prss36	3.16173e-38	-0.433562	0.114	0.342	7.85815e-34
Snrpd1	3.52918e-38	0.37885	0.8	0.428	8.77142e-34
Gjc1	3.53545e-38	0.326109	0.425	0.079	8.787e-34
Nacc2	4.04433e-38	-0.523325	0.288	0.528	1.00518e-33
Nr4a3	5.26416e-38	0.463505	0.952	0.619	1.30835e-33
Cnn3	6.25913e-38	-0.459184	0.973	0.963	1.55564e-33
Ncoa4	6.39343e-38	0.276143	0.315	0.002	1.58902e-33
Insig1	6.62568e-38	-0.952504	0.399	0.609	1.64675e-33
Cpxm2	7.57605e-38	-0.717552	0.586	0.742	1.88295e-33
Cwf19l2	8.17245e-38	0.322828	0.435	0.091	2.03118e-33
Sf3b2	8.33701e-38	0.365901	0.903	0.595	2.07208e-33
Ift74	8.41686e-38	0.321919	0.435	0.086	2.09193e-33
Ppp2r5c	8.9811e-38	0.323732	0.528	0.177	2.23216e-33
S100a6	9.25589e-38	-1.04077	0.557	0.759	2.30046e-33
Thoc7	9.54905e-38	0.35146	0.769	0.408	2.37332e-33
Dnttip2	1.05631e-37	0.298536	0.571	0.201	2.62535e-33
Rfx4	1.55102e-37	0.429928	0.816	0.464	3.8549e-33
Zfp148	1.55149e-37	0.355388	0.646	0.275	3.85608e-33
Cdk6	1.55674e-37	0.383113	0.617	0.229	3.86913e-33
Adgrl2	1.67273e-37	0.334472	0.571	0.211	4.15739e-33
Dcaf1	1.76667e-37	0.269434	0.307	0	4.39088e-33
Strbp	1.77816e-37	0.367471	0.792	0.428	4.41944e-33
Cxadr	1.81035e-37	0.388012	0.762	0.393	4.49943e-33
Sf3b6	1.84282e-37	0.327747	0.845	0.462	4.58014e-33
Wapl	2.01239e-37	0.340568	0.637	0.273	5.0016e-33
mt-Nd4	2.04778e-37	0.257205	0.996	0.995	5.08956e-33
Ptprs	2.34159e-37	0.333073	0.571	0.209	5.81979e-33
Ube2i	2.80433e-37	0.36549	0.877	0.526	6.96987e-33
Adh5	3.21071e-37	0.302094	0.788	0.378	7.97989e-33
Dtna	3.21107e-37	0.394317	0.707	0.337	7.9808e-33
Arl6ip5	3.32191e-37	-0.656083	0.453	0.656	8.25628e-33
Zfp652	4.00795e-37	0.337443	0.517	0.162	9.96137e-33
Ptpa	4.50166e-37	0.264092	0.304	0	1.11884e-32
Tead2	4.76053e-37	0.324139	0.468	0.115	1.18318e-32
Txn1	5.21936e-37	0.34921	0.989	0.853	1.29722e-32
Comt	5.33887e-37	-0.572768	0.704	0.769	1.32692e-32
Ywhab	7.49159e-37	0.35876	0.886	0.541	1.86196e-32
Eloa	8.37851e-37	0.260721	0.303	0	2.0824e-32
Upf3a	8.43536e-37	0.320227	0.464	0.118	2.09652e-32
Rac3	8.58511e-37	-0.429543	0.181	0.428	2.13374e-32
Bptf	9.0616e-37	0.400159	0.849	0.506	2.25217e-32
Hdgfl2	1.14225e-36	0.258761	0.302	0	2.83894e-32
Hdlbp	1.25743e-36	0.377384	0.808	0.467	3.12521e-32
Cdip1	1.30613e-36	0.337942	0.538	0.184	3.24626e-32
Cldn6	1.37062e-36	0.381165	0.627	0.248	3.40654e-32
Psma5	1.45749e-36	0.318132	0.821	0.44	3.62243e-32
Cnot3	1.66555e-36	0.314899	0.51	0.152	4.13955e-32
Pum1	1.68925e-36	0.362499	0.769	0.42	4.19847e-32
Cd63	1.69605e-36	-0.372372	0.983	0.956	4.21537e-32
Tspo	2.11166e-36	-0.588418	0.571	0.705	5.24832e-32
Usp15	2.23372e-36	0.307232	0.41	0.076	5.55169e-32
Snrnp48	2.46892e-36	0.311919	0.578	0.216	6.13624e-32
Ints13	2.88618e-36	0.275561	0.299	0	7.17332e-32
Ufd1	2.88618e-36	0.250241	0.299	0	7.17332e-32
Lypd2	2.89953e-36	0.378114	0.323	0.015	7.20649e-32
S100a13	2.97824e-36	-0.530069	0.218	0.467	7.40212e-32
Ostc	3.09413e-36	0.319971	0.812	0.425	7.69016e-32
Rbm26	3.14079e-36	0.335367	0.592	0.236	7.80612e-32
Fam208a	3.76902e-36	0.303531	0.53	0.16	9.36753e-32
Gm1673	4.04633e-36	0.362529	0.713	0.346	1.00568e-31
Six4	4.85201e-36	0.368095	0.521	0.179	1.20592e-31
Cct5	4.94112e-36	0.323555	0.89	0.533	1.22807e-31
Sltm	5.21184e-36	0.406661	0.674	0.322	1.29535e-31
Ash1l	5.69998e-36	0.392654	0.719	0.381	1.41667e-31
Ddx23	6.51333e-36	0.285496	0.356	0.039	1.61882e-31
Islr	7.67755e-36	0.340785	0.464	0.115	1.90818e-31
Zfp292	7.8902e-36	0.366668	0.618	0.263	1.96103e-31
Bsg	8.6526e-36	-0.418658	0.985	0.951	2.15052e-31
Asf1a	8.69569e-36	0.289239	0.502	0.143	2.16123e-31
Zfp397	8.76817e-36	0.309309	0.465	0.123	2.17924e-31
Tle4	8.78423e-36	0.381292	0.634	0.275	2.18323e-31
Wbp11	9.35239e-36	0.328432	0.631	0.268	2.32444e-31
Slc16a2	9.41639e-36	0.378185	0.902	0.572	2.34035e-31
Rnf180	9.94951e-36	0.274951	0.299	0.002	2.47285e-31
Bhlhe40	1.00627e-35	-0.783419	0.382	0.6	2.50098e-31
Xiap	1.22628e-35	0.339145	0.591	0.243	3.04781e-31
Nipsnap2	1.81978e-35	0.260553	0.293	0	4.52288e-31
6330403K07Rik	2.31316e-35	-0.623681	0.692	0.742	5.74913e-31
Sptan1	2.82479e-35	0.345857	0.732	0.369	7.02072e-31
Vezf1	3.36642e-35	0.368972	0.779	0.415	8.3669e-31
Capn6	3.64515e-35	0.378293	0.639	0.268	9.05966e-31
Rpl36a-ps1	3.90032e-35	0.255493	0.291	0	9.69385e-31
Klf9	3.99268e-35	-0.686979	0.675	0.749	9.92341e-31
Tra2a	4.29685e-35	0.405842	0.843	0.538	1.06794e-30
Arhgef12	4.5874e-35	0.343879	0.619	0.26	1.14015e-30
Tmcc3	4.63287e-35	-0.447576	0.116	0.337	1.15145e-30
Arfgef1	5.26692e-35	0.31011	0.563	0.219	1.30904e-30
Cox6c	6.10839e-35	0.285314	0.995	0.948	1.51818e-30
Gm26669	6.11641e-35	0.308013	0.309	0.01	1.52017e-30
Magoh	6.62725e-35	0.310067	0.809	0.43	1.64714e-30
Mlc1	6.83188e-35	-0.702895	0.369	0.57	1.698e-30
Babam2	8.33562e-35	0.252315	0.289	0	2.07173e-30
Wdr26	8.68383e-35	0.310941	0.645	0.29	2.15828e-30
Trim33	8.87889e-35	0.296953	0.453	0.115	2.20676e-30
Hnrnpc	9.17429e-35	0.325628	0.891	0.59	2.28018e-30
Gsta4	9.91481e-35	-0.665324	0.557	0.703	2.46423e-30
Exoc3	1.07556e-34	0.288463	0.509	0.157	2.6732e-30
Paics	1.22064e-34	0.318789	0.742	0.361	3.03379e-30
Zc3h14	1.46945e-34	0.312439	0.642	0.278	3.65216e-30
Gcc2	1.54557e-34	0.303855	0.534	0.177	3.84136e-30
Rnps1	1.55895e-34	0.285611	0.664	0.314	3.87461e-30
Gpc6	1.57412e-34	0.365162	0.741	0.378	3.91233e-30
Rc3h1	1.71969e-34	0.335187	0.509	0.17	4.27413e-30
Dhx15	1.7392e-34	0.299289	0.664	0.307	4.3226e-30
Brd7	2.18689e-34	0.296696	0.51	0.17	5.4353e-30
Smap1	2.42931e-34	0.349458	0.814	0.459	6.03782e-30
Cisd3	2.43364e-34	-0.407753	0.133	0.356	6.04857e-30
Il10rb	2.66202e-34	-0.571071	0.515	0.671	6.61618e-30
Sgms2	2.89443e-34	-0.842357	0.296	0.514	7.19383e-30
Eva1c	3.03012e-34	-0.538467	0.109	0.317	7.53106e-30
Add3	3.15761e-34	0.369895	0.662	0.319	7.84791e-30
Eif3h	3.16129e-34	0.319421	0.975	0.744	7.85707e-30
Man1a2	3.98507e-34	0.307293	0.672	0.329	9.9045e-30
Zfhx3	4.11831e-34	0.368969	0.856	0.528	1.02357e-29
Alg10b	4.86548e-34	0.259802	0.341	0.034	1.20927e-29
Myef2	4.90769e-34	0.299286	0.475	0.14	1.21976e-29
Il17rc	5.05294e-34	-0.388219	0.134	0.356	1.25586e-29
Ep300	5.12291e-34	0.29374	0.509	0.162	1.27325e-29
Igf1r	5.40092e-34	0.367354	0.815	0.467	1.34235e-29
Rcn1	5.46455e-34	0.318496	0.666	0.305	1.35816e-29
Qser1	5.80455e-34	0.288606	0.445	0.12	1.44266e-29
Trip11	6.07139e-34	0.326987	0.554	0.214	1.50898e-29
Mettl7a1	6.14101e-34	-0.677866	0.509	0.673	1.52629e-29
Map3k20	6.88513e-34	0.253421	0.283	0	1.71123e-29
Dhx40	7.12716e-34	0.315146	0.559	0.219	1.77139e-29
Appbp2	7.90393e-34	0.32251	0.637	0.295	1.96444e-29
Micu2	8.15467e-34	0.277661	0.482	0.143	2.02676e-29
Tmem132c	1.06412e-33	0.310689	0.354	0.047	2.64476e-29
Patj	1.25354e-33	0.253517	0.281	0	3.11554e-29
N4bp2	1.32486e-33	0.323099	0.466	0.14	3.29281e-29
Cltb	1.42282e-33	-0.575824	0.626	0.71	3.53628e-29
Ctcf	1.5995e-33	0.350896	0.67	0.322	3.97539e-29
Kif13b	1.85169e-33	0.250438	0.314	0.02	4.6022e-29
Abracl	1.95549e-33	0.381594	0.732	0.381	4.86018e-29
Daam1	2.53854e-33	0.313111	0.454	0.125	6.30928e-29
Setd5	2.94562e-33	0.313633	0.677	0.342	7.32105e-29
Fam76b	3.15844e-33	0.288637	0.411	0.096	7.84998e-29
Ptprz1	3.22564e-33	0.383936	0.419	0.103	8.017e-29
Ddit4	3.42845e-33	-0.418213	0.099	0.302	8.52106e-29
4833420G17Rik	3.56891e-33	0.292031	0.446	0.118	8.87017e-29
Srsf3	4.30935e-33	0.360931	0.964	0.769	1.07104e-28
Ddx21	4.35619e-33	0.325564	0.593	0.241	1.08269e-28
Vps13a	5.57373e-33	0.279645	0.401	0.086	1.38529e-28
Il11ra1	6.12718e-33	-0.464873	0.292	0.523	1.52285e-28
Tcp1	6.96372e-33	0.330812	0.807	0.472	1.73076e-28
Rgs2	8.00656e-33	-0.648073	0.862	0.912	1.98995e-28
Cep350	8.30503e-33	0.285712	0.375	0.066	2.06413e-28
Nectin1	8.6793e-33	0.253269	0.275	0	2.15715e-28
Iscu	8.68395e-33	-0.427849	0.831	0.816	2.15831e-28
Myd88	9.14494e-33	-0.454241	0.1	0.302	2.27288e-28
Lrp10	1.18055e-32	-0.599134	0.457	0.624	2.93414e-28
Prr13	1.26678e-32	-0.595469	0.474	0.636	3.14844e-28
Ppp1r12a	1.27362e-32	0.311627	0.626	0.268	3.16545e-28
Ank3	1.47959e-32	0.333435	0.618	0.275	3.67738e-28
Scpep1	1.97087e-32	0.780965	0.757	0.479	4.89841e-28
Ywhae	1.98373e-32	0.29068	0.986	0.889	4.93035e-28
Thoc2	2.02859e-32	0.342799	0.777	0.457	5.04185e-28
N4bp2l2	2.16109e-32	0.302214	0.692	0.342	5.37117e-28
Banf1	2.2548e-32	0.323417	0.75	0.393	5.60409e-28
Dnmt3a	2.36372e-32	0.302717	0.548	0.201	5.87479e-28
Myo1e	2.41301e-32	0.325436	0.631	0.275	5.99731e-28
Nkd1	2.45753e-32	0.282006	0.283	0.007	6.10794e-28
Abce1	2.81437e-32	0.264398	0.431	0.113	6.99484e-28
Gmps	2.83653e-32	0.27692	0.55	0.209	7.04992e-28
Zfr	3.05085e-32	0.33332	0.788	0.445	7.58257e-28
Lig1	3.06493e-32	0.490877	0.418	0.108	7.61758e-28
Cbr2	3.13134e-32	-0.345441	0.08	0.27	7.78262e-28
2510009E07Rik	3.41917e-32	0.361925	0.493	0.167	8.498e-28
Csnk1g3	3.58267e-32	0.287941	0.481	0.152	8.90437e-28
Spry1	3.84762e-32	0.548919	0.623	0.287	9.56289e-28
Slc9a3r1	4.81087e-32	-0.630206	0.669	0.74	1.19569e-27
Larp7	6.03349e-32	0.285664	0.586	0.248	1.49956e-27
Ssbp1	7.29236e-32	0.293819	0.69	0.337	1.81244e-27
Rfc1	7.92832e-32	0.326361	0.678	0.319	1.9705e-27
Pcdh7	9.17235e-32	0.366421	0.702	0.369	2.2797e-27
Rala	9.5986e-32	0.28113	0.737	0.383	2.38564e-27
Ralgps2	9.85196e-32	0.270774	0.431	0.111	2.44861e-27
Egln1	1.01375e-31	0.264719	0.422	0.106	2.51958e-27
Tomm7	1.09199e-31	0.311546	0.97	0.779	2.71402e-27
Snrpd3	1.1114e-31	0.274607	0.775	0.41	2.76228e-27
Clu	1.40654e-31	-0.758307	0.93	0.921	3.49582e-27
Gadd45g	1.53654e-31	-1.15977	0.452	0.673	3.81893e-27
Rabgap1	1.63858e-31	0.278254	0.473	0.145	4.07251e-27
Caprin1	1.74418e-31	0.318048	0.69	0.349	4.33498e-27
Net1	1.77776e-31	0.320412	0.374	0.071	4.41845e-27
Eif1ax	1.89484e-31	0.31891	0.75	0.381	4.70945e-27
Mrln	1.9e-31	0.28188	0.265	0	4.72226e-27
Ptgds	1.91548e-31	0.304109	0.609	0.246	4.76072e-27
Fkbp1a	2.17273e-31	-0.446143	0.821	0.816	5.4001e-27
Fos	2.23693e-31	-1.0934	0.689	0.821	5.55967e-27
Mgp	2.73137e-31	0.583551	0.724	0.423	6.78854e-27
Utp3	2.91263e-31	0.298372	0.566	0.238	7.23904e-27
Rev3l	3.07349e-31	0.292732	0.415	0.108	7.63886e-27
Phactr4	3.29605e-31	0.286738	0.503	0.174	8.19201e-27
Plscr1	3.36656e-31	-0.875955	0.291	0.506	8.36725e-27
Rsl1d1	3.47969e-31	0.274035	0.663	0.322	8.64842e-27
Maml3	3.65412e-31	0.288584	0.394	0.093	9.08195e-27
Klf5	3.89427e-31	0.38345	0.789	0.447	9.67881e-27
Erbb4	4.44291e-31	0.286545	0.465	0.138	1.10424e-26
AC154683.1	4.54802e-31	0.260091	0.263	0	1.13037e-26
Ola1	4.70959e-31	0.257377	0.576	0.241	1.17052e-26
Cd82	5.08616e-31	-0.623437	0.528	0.658	1.26412e-26
Ankrd11	5.10699e-31	0.328319	0.878	0.555	1.26929e-26
Cdk14	5.58166e-31	0.308835	0.657	0.317	1.38727e-26
Gtf2b	5.70703e-31	0.290173	0.519	0.182	1.41843e-26
Grina	5.84641e-31	-0.524789	0.347	0.563	1.45307e-26
Ubxn7	5.8783e-31	0.261741	0.408	0.098	1.46099e-26
Gadd45a	5.88402e-31	-0.673082	0.209	0.432	1.46241e-26
Cdk4	6.97767e-31	0.338911	0.895	0.607	1.73423e-26
Epc2	7.52938e-31	0.287072	0.493	0.179	1.87135e-26
Atp6v0e	8.09731e-31	-0.52406	0.705	0.749	2.01251e-26
Xrn1	8.73164e-31	0.271843	0.444	0.123	2.17016e-26
Cpsf6	9.77758e-31	0.311214	0.64	0.307	2.43012e-26
Taf15	1.00022e-30	0.283267	0.53	0.204	2.48595e-26
Pdia6	1.00102e-30	0.319287	0.934	0.654	2.48794e-26
Prdx6	1.08755e-30	-0.485293	0.825	0.828	2.703e-26
Sh3glb1	1.09895e-30	0.296882	0.758	0.423	2.73132e-26
Eif5b	1.24603e-30	0.33958	0.83	0.518	3.09688e-26
Copb1	1.46306e-30	0.256329	0.652	0.305	3.63628e-26
Sqstm1	1.50037e-30	-0.743053	0.731	0.784	3.72901e-26
Lztfl1	1.82761e-30	0.283609	0.528	0.199	4.54233e-26
Lamc1	1.94482e-30	0.35675	0.789	0.442	4.83365e-26
Iws1	2.03792e-30	0.27385	0.444	0.135	5.06506e-26
Zdhhc23	2.09049e-30	0.252635	0.263	0.002	5.1957e-26
Rnasel	2.48737e-30	0.270315	0.306	0.032	6.1821e-26
Ncam1	2.50589e-30	0.368172	0.756	0.442	6.22814e-26
Irs2	2.87982e-30	0.432664	0.889	0.575	7.15751e-26
Apln	2.97197e-30	-0.450818	0.164	0.378	7.38654e-26
Polr2a	3.27601e-30	0.313745	0.557	0.233	8.1422e-26
Prpf38b	3.29136e-30	0.302753	0.715	0.388	8.18035e-26
Cryab	3.32506e-30	-1.35267	0.723	0.752	8.2641e-26
Gm266	3.38144e-30	0.389957	0.744	0.415	8.40424e-26
Malat1	3.52891e-30	-0.381118	0.997	1	8.77076e-26
Pspc1	3.65616e-30	0.258623	0.409	0.108	9.08703e-26
Cox7a2	4.37599e-30	0.286044	0.973	0.764	1.08761e-25
Rbmxl1	4.67009e-30	0.279501	0.606	0.292	1.1607e-25
Gtpbp4	5.22599e-30	0.286474	0.573	0.243	1.29887e-25
Ski	5.5117e-30	0.310446	0.682	0.344	1.36988e-25
Arhgap18	8.99053e-30	0.252105	0.363	0.071	2.23451e-25
Pnpla8	1.02685e-29	0.281246	0.611	0.275	2.55213e-25
Sclt1	1.31277e-29	0.321662	0.387	0.098	3.26275e-25
Tnks2	1.46462e-29	0.308969	0.674	0.332	3.64016e-25
Dync1i2	1.51285e-29	0.311075	0.9	0.614	3.76003e-25
Maged2	1.72188e-29	0.328621	0.792	0.452	4.27955e-25
Lbp	1.93101e-29	-0.533723	0.219	0.442	4.79933e-25
Col22a1	1.93143e-29	0.253865	0.268	0.01	4.80037e-25
Rassf3	2.02835e-29	-0.455666	0.171	0.383	5.04125e-25
Ier3	2.16912e-29	-0.793195	0.271	0.486	5.39113e-25
Arid2	2.3694e-29	0.259587	0.45	0.145	5.88891e-25
Khsrp	2.8556e-29	0.253275	0.408	0.101	7.09731e-25
Sap30l	3.1671e-29	0.257468	0.486	0.167	7.87151e-25
Samd5	3.20844e-29	0.254844	0.269	0.012	7.97426e-25
Zfp945	3.59889e-29	0.264468	0.414	0.12	8.94469e-25
mt-Nd6	3.87601e-29	0.27251	0.318	0.042	9.63345e-25
Phf20l1	3.94703e-29	0.29534	0.595	0.275	9.80996e-25
Lamp1	3.97984e-29	-0.427961	0.917	0.87	9.8915e-25
Tox3	4.07108e-29	0.301729	0.432	0.128	1.01183e-24
Arl2	4.16186e-29	-0.581132	0.436	0.59	1.03439e-24
Uri1	4.36552e-29	0.278614	0.614	0.273	1.08501e-24
Dync2li1	4.43802e-29	0.261032	0.591	0.253	1.10303e-24
Prelp	5.44964e-29	-0.434563	0.208	0.425	1.35445e-24
Bag3	6.36922e-29	-0.526072	0.181	0.391	1.58301e-24
Ppil4	6.42473e-29	0.258459	0.484	0.172	1.5968e-24
Ptprk	7.49316e-29	0.26009	0.6	0.265	1.86235e-24
Dctn4	8.29651e-29	0.266364	0.69	0.334	2.06202e-24
Ccdc50	8.40932e-29	0.26055	0.616	0.273	2.09005e-24
Ik	8.42061e-29	0.257566	0.592	0.268	2.09286e-24
Dnaja4	9.51114e-29	-0.571817	0.125	0.319	2.3639e-24
Spred1	9.60887e-29	0.288618	0.582	0.256	2.38819e-24
R3hdm2	1.00268e-28	0.288122	0.615	0.3	2.49207e-24
Psme1	1.01599e-28	0.273462	0.842	0.526	2.52513e-24
Tuba1a	1.15178e-28	-0.541019	0.923	0.916	2.86263e-24
Eif3i	1.18007e-28	0.281077	0.904	0.57	2.93295e-24
Diaph1	1.22246e-28	0.284801	0.604	0.265	3.0383e-24
Trp53bp2	1.38549e-28	0.297188	0.52	0.194	3.44349e-24
Frat2	1.59726e-28	0.359291	0.499	0.199	3.96983e-24
Med13	1.59901e-28	0.265835	0.48	0.165	3.97417e-24
Mier1	1.60749e-28	0.28935	0.731	0.398	3.99526e-24
Thsd7a	1.70877e-28	0.347389	0.757	0.423	4.24697e-24
Ajap1	1.72322e-28	0.26406	0.343	0.064	4.28289e-24
Hnrnpl	1.73887e-28	0.288793	0.818	0.494	4.32178e-24
Stx11	1.76097e-28	-0.469268	0.084	0.258	4.37671e-24
9930021J03Rik	1.83986e-28	0.293332	0.447	0.143	4.57279e-24
Gtf2ird1	1.91407e-28	0.268836	0.508	0.199	4.75723e-24
Eif3f	2.02136e-28	0.273239	0.987	0.867	5.02389e-24
Zfp329	2.1353e-28	0.259854	0.354	0.076	5.30707e-24
Gnai2	2.16557e-28	-0.34955	0.951	0.894	5.38232e-24
Larp4	2.33096e-28	0.294042	0.536	0.219	5.79337e-24
2007-09-01	2.55068e-28	0.278534	0.869	0.553	6.33945e-24
Aebp2	2.55378e-28	0.322304	0.823	0.501	6.34715e-24
Lcorl	2.6741e-28	0.252052	0.326	0.057	6.64621e-24
Mecom	2.75669e-28	0.286633	0.696	0.342	6.85148e-24
Pkn2	2.97079e-28	0.281845	0.764	0.437	7.38359e-24
Vcl	3.41104e-28	0.35313	0.75	0.408	8.47779e-24
Siva1	3.74726e-28	0.344472	0.675	0.354	9.31343e-24
Mcm6	3.88297e-28	0.356863	0.351	0.076	9.65073e-24
Atxn7l3b	3.9207e-28	0.30017	0.972	0.759	9.7445e-24
Ddx42	4.78763e-28	0.275321	0.529	0.219	1.18992e-23
Btf3l4	5.25332e-28	-0.40765	0.234	0.442	1.30566e-23
Rcor1	5.54606e-28	0.253635	0.413	0.12	1.37842e-23
Ppig	5.58178e-28	0.332006	0.782	0.501	1.3873e-23
Saraf	5.68986e-28	-0.493436	0.737	0.767	1.41416e-23
Actl6a	6.47443e-28	0.259678	0.561	0.238	1.60915e-23
Mbtd1	6.62328e-28	0.268871	0.491	0.184	1.64615e-23
Sppl2a	6.91124e-28	0.272415	0.487	0.182	1.71772e-23
Cir1	7.35794e-28	0.252103	0.57	0.253	1.82874e-23
Aff4	8.18281e-28	0.312782	0.76	0.435	2.03375e-23
Zfp280d	8.48918e-28	0.260002	0.436	0.14	2.1099e-23
Ncoa7	9.36068e-28	0.384	0.593	0.292	2.3265e-23
Smpd1	9.50457e-28	-0.467392	0.284	0.486	2.36227e-23
Sfrp2	9.8167e-28	0.259588	0.269	0.02	2.43984e-23
Ube2h	1.0573e-27	0.321551	0.687	0.373	2.62782e-23
2810004N23Rik	1.08856e-27	0.256758	0.488	0.182	2.7055e-23
Ube3a	1.11769e-27	0.306753	0.692	0.381	2.77792e-23
Olfm1	1.14973e-27	0.267758	0.589	0.263	2.85754e-23
Tfdp2	1.15801e-27	0.255717	0.48	0.184	2.87812e-23
Kat6a	1.27146e-27	0.280389	0.479	0.174	3.1601e-23
Rassf10	1.2825e-27	0.316961	0.454	0.157	3.18753e-23
Irf2	1.32114e-27	0.257919	0.478	0.165	3.28357e-23
Dnajc2	1.36231e-27	0.280601	0.444	0.15	3.38588e-23
Suclg1	1.61009e-27	0.255058	0.757	0.405	4.00171e-23
Klf10	1.88401e-27	-0.604244	0.358	0.541	4.68253e-23
Pcmtd2	2.26304e-27	0.257717	0.447	0.15	5.62455e-23
Rab7	2.2966e-27	-0.507576	0.633	0.703	5.70796e-23
Hmga2	2.36136e-27	0.266601	0.338	0.064	5.86892e-23
Zkscan3	2.4081e-27	0.265088	0.507	0.204	5.9851e-23
Zfp106	2.63814e-27	0.272178	0.593	0.268	6.55684e-23
Rab11fip2	3.2311e-27	0.288457	0.538	0.236	8.03057e-23
Hist1h4d	3.44464e-27	0.401017	0.264	0.02	8.56132e-23
Tcf12	3.51758e-27	0.282954	0.701	0.359	8.7426e-23
Syt7	3.95183e-27	0.300614	0.528	0.224	9.82188e-23
Trim28	4.10549e-27	0.277365	0.601	0.283	1.02038e-22
Gsk3b	4.21482e-27	0.266616	0.822	0.506	1.04755e-22
Plch1	4.71427e-27	0.294923	0.529	0.226	1.17168e-22
Kif2a	4.85673e-27	0.265003	0.507	0.204	1.20709e-22
Cnot1	5.86444e-27	0.258472	0.513	0.206	1.45755e-22
Atp5a1	5.94041e-27	0.250261	0.975	0.821	1.47643e-22
Ttc28	6.17006e-27	0.292701	0.409	0.128	1.53351e-22
Snhg6	6.55397e-27	0.25461	0.517	0.216	1.62892e-22
Impact	6.62154e-27	-0.436806	0.204	0.41	1.64572e-22
Amer1	6.99244e-27	0.282665	0.387	0.101	1.7379e-22
Atp5c1	7.24268e-27	0.261704	0.951	0.727	1.8001e-22
Prpf8	7.84148e-27	0.287108	0.577	0.28	1.94892e-22
Acsl3	8.02572e-27	0.391746	0.771	0.486	1.99471e-22
Bnip3l	8.04397e-27	0.277156	0.889	0.602	1.99925e-22
Ptms	9.27128e-27	0.349953	0.989	0.867	2.30428e-22
Rgs9	9.32852e-27	0.257519	0.338	0.071	2.31851e-22
Igfbp3	1.08134e-26	0.413455	0.266	0.02	2.68756e-22
Ankrd17	1.10632e-26	0.320751	0.732	0.423	2.74964e-22
Rhov	1.12737e-26	-0.616145	0.377	0.558	2.80197e-22
Eif4g2	1.34438e-26	0.276565	0.954	0.769	3.34133e-22
Dut	1.58457e-26	0.390693	0.532	0.231	3.93828e-22
Elf3	1.60302e-26	-0.71725	0.358	0.541	3.98414e-22
Tnfrsf1a	1.61908e-26	-0.483319	0.316	0.506	4.02405e-22
Txnl1	1.6741e-26	0.259222	0.81	0.477	4.16081e-22
Tenm3	1.79155e-26	0.297934	0.604	0.295	4.45273e-22
Fhl2	1.81728e-26	0.269377	0.599	0.258	4.51667e-22
Swap70	1.89637e-26	0.280324	0.502	0.194	4.71323e-22
Ubtf	2.06272e-26	0.277448	0.64	0.324	5.12669e-22
Ilf3	2.13748e-26	0.251563	0.47	0.182	5.31249e-22
Spats2l	2.1745e-26	0.268812	0.522	0.204	5.4045e-22
Klf2	2.9313e-26	-1.1024	0.332	0.516	7.28546e-22
Syap1	2.9754e-26	0.254524	0.68	0.344	7.39505e-22
Igbp1	3.98444e-26	0.250517	0.564	0.251	9.90294e-22
Celf2	4.34991e-26	0.297744	0.724	0.41	1.08113e-21
Ylpm1	4.37768e-26	0.25982	0.458	0.17	1.08803e-21
Syne2	4.43974e-26	0.276634	0.608	0.297	1.10345e-21
Por	4.566e-26	-0.541225	0.597	0.7	1.13483e-21
Prmt1	5.04507e-26	0.269405	0.808	0.479	1.2539e-21
Vdac3	5.31669e-26	0.268313	0.801	0.489	1.32141e-21
Dapl1	5.47531e-26	0.361682	0.431	0.15	1.36083e-21
Bbx	5.49123e-26	0.257612	0.783	0.474	1.36479e-21
Map9	6.89728e-26	0.294809	0.376	0.108	1.71425e-21
Ssrp1	6.90179e-26	0.273343	0.657	0.354	1.71537e-21
Cox7b	7.09967e-26	0.297415	0.932	0.705	1.76455e-21
Smc4	8.52511e-26	0.422088	0.343	0.086	2.11883e-21
Kmt2a	8.72473e-26	0.293272	0.598	0.3	2.16844e-21
Ncor1	8.91341e-26	0.288555	0.85	0.565	2.21534e-21
Arid4a	9.18714e-26	0.281854	0.488	0.199	2.28337e-21
Zc3h13	9.91157e-26	0.284814	0.485	0.201	2.46342e-21
Usp7	1.08035e-25	0.250394	0.556	0.26	2.6851e-21
Id3	1.09482e-25	-0.797531	0.222	0.43	2.72106e-21
Smc2	1.1061e-25	0.46983	0.305	0.057	2.7491e-21
Usmg5	1.3464e-25	0.266	0.949	0.752	3.34634e-21
Epb41l2	1.41188e-25	0.290752	0.675	0.369	3.50909e-21
Atp2b4	1.54975e-25	0.314618	0.701	0.386	3.85175e-21
Ggt7	1.82261e-25	-0.397858	0.176	0.371	4.52992e-21
Zcchc7	1.89184e-25	0.265715	0.547	0.251	4.70197e-21
Klk11	1.90429e-25	-0.281809	0.089	0.258	4.73292e-21
Slc35e4	1.97548e-25	-0.334262	0.091	0.26	4.90985e-21
Birc6	2.24994e-25	0.256854	0.635	0.317	5.59199e-21
Rad21	2.2532e-25	0.308325	0.585	0.29	5.6001e-21
Zfp516	2.53249e-25	0.251785	0.568	0.251	6.29424e-21
Bex2	2.56216e-25	0.396195	0.78	0.523	6.368e-21
Zc3h15	2.67973e-25	0.278849	0.777	0.472	6.66021e-21
Nr4a2	3.01779e-25	0.334646	0.809	0.499	7.50043e-21
Rprm	3.12938e-25	-0.455135	0.134	0.317	7.77776e-21
Phgdh	3.14094e-25	0.298259	0.944	0.747	7.80649e-21
Tmem165	3.50754e-25	0.264731	0.784	0.45	8.71765e-21
Mob1b	3.77568e-25	0.273566	0.547	0.246	9.38407e-21
Tnnt1	3.90343e-25	-0.403626	0.131	0.317	9.70158e-21
Pdia3	4.78405e-25	0.271565	0.939	0.698	1.18903e-20
Huwe1	5.25844e-25	0.264119	0.759	0.447	1.30693e-20
Maf	5.26891e-25	0.287294	0.264	0.027	1.30953e-20
Nedd4l	5.79932e-25	0.306013	0.581	0.285	1.44136e-20
Kat6b	5.81851e-25	0.252398	0.53	0.233	1.44613e-20
G0s2	6.60764e-25	-0.813509	0.329	0.518	1.64226e-20
S100a10	7.25545e-25	-0.526264	0.956	0.941	1.80327e-20
Mageh1	7.46652e-25	0.426442	0.847	0.572	1.85573e-20
Aldh3a1	7.66477e-25	-0.572817	0.222	0.415	1.905e-20
Arpc5	8.22383e-25	0.300822	0.826	0.528	2.04395e-20
Acta2	8.53707e-25	1.00137	0.444	0.17	2.1218e-20
Sub1	8.91222e-25	0.259545	0.974	0.835	2.21504e-20
Fam126a	9.42918e-25	0.279374	0.589	0.283	2.34353e-20
Atad2	1.08689e-24	0.319908	0.263	0.029	2.70135e-20
BC029722	1.10949e-24	-0.318496	0.117	0.3	2.75752e-20
Hipk2	1.11435e-24	0.258423	0.567	0.26	2.7696e-20
Tmsb4x	1.11465e-24	-0.432537	0.994	0.995	2.77034e-20
Abhd14b	1.14038e-24	-0.432639	0.22	0.415	2.8343e-20
Eci2	1.29211e-24	0.286865	0.884	0.595	3.21142e-20
Amd1	1.34722e-24	0.272188	0.639	0.324	3.34837e-20
Lgmn	1.35681e-24	-0.511105	0.677	0.737	3.37222e-20
Tia1	1.50178e-24	0.263511	0.626	0.329	3.73252e-20
Calu	1.57832e-24	0.258975	0.702	0.391	3.92274e-20
Luc7l2	1.83311e-24	0.290044	0.892	0.609	4.55602e-20
Cks1b	2.17487e-24	0.318466	0.597	0.305	5.40543e-20
Smc6	2.27196e-24	0.300904	0.527	0.248	5.64673e-20
Nfix	2.88408e-24	0.297988	0.985	0.821	7.16809e-20
Car8	2.9223e-24	-0.399537	0.11	0.283	7.26307e-20
Nfkbiz	3.06941e-24	-0.611554	0.32	0.494	7.62872e-20
Tm9sf3	4.21011e-24	0.267402	0.844	0.563	1.04638e-19
Ppargc1a	6.27179e-24	0.382465	0.379	0.12	1.55879e-19
Sik2	7.10625e-24	0.305534	0.423	0.157	1.76619e-19
Ifrd1	8.39095e-24	-0.819237	0.836	0.811	2.08549e-19
Pea15a	9.28308e-24	-0.472668	0.404	0.558	2.30722e-19
Creb1	9.31017e-24	0.266796	0.407	0.143	2.31395e-19
Larp4b	9.89462e-24	0.25757	0.568	0.26	2.45921e-19
Mmd	1.08261e-23	-0.380957	0.203	0.393	2.69072e-19
Eprs	1.20358e-23	0.303048	0.814	0.496	2.99137e-19
Cldn10	1.44421e-23	-0.476022	0.167	0.356	3.58944e-19
Cox5a	1.4726e-23	0.285356	0.899	0.624	3.66e-19
Map3k1	2.25353e-23	0.265661	0.394	0.133	5.60092e-19
Tubb5	2.28105e-23	0.677148	0.841	0.602	5.66931e-19
Gsto1	2.36721e-23	-0.505692	0.123	0.295	5.88347e-19
Lpp	2.99975e-23	0.259611	0.676	0.361	7.45558e-19
Ak3	3.34297e-23	0.264	0.664	0.364	8.30862e-19
Gabrg3	3.51334e-23	0.254289	0.406	0.143	8.73206e-19
Sh3bgrl	3.64289e-23	0.285572	0.821	0.55	9.05403e-19
Homer1	3.88368e-23	0.333957	0.63	0.324	9.65249e-19
Frem2	5.81025e-23	0.271146	0.396	0.138	1.44408e-18
Myl12a	5.82794e-23	-0.400071	0.971	0.956	1.44848e-18
Osbpl1a	6.07687e-23	0.279551	0.482	0.209	1.51035e-18
Srp19	6.34855e-23	0.261493	0.578	0.287	1.57787e-18
Crip1	6.5043e-23	-0.522981	0.592	0.703	1.61658e-18
Bcl7c	6.72857e-23	0.258427	0.874	0.577	1.67232e-18
Ptges3	9.14995e-23	0.270828	0.866	0.587	2.27413e-18
Anapc11	9.33181e-23	-0.454701	0.69	0.727	2.31933e-18
Kdm5a	9.42499e-23	0.260757	0.651	0.346	2.34249e-18
Eif1	1.03321e-22	-0.297853	0.999	0.995	2.56795e-18
Setbp1	1.15863e-22	0.260046	0.514	0.233	2.87965e-18
Srsf11	1.17677e-22	0.280622	0.869	0.622	2.92474e-18
Mcm7	1.20256e-22	0.258767	0.324	0.084	2.98883e-18
Ptbp3	1.66704e-22	0.264599	0.682	0.381	4.14327e-18
Calm3	1.72132e-22	-0.482416	0.652	0.7	4.27818e-18
Rragd	1.97047e-22	0.297657	0.783	0.474	4.89741e-18
Smad7	3.16829e-22	0.253584	0.559	0.268	7.87448e-18
Hcfc1r1	3.24084e-22	-0.483587	0.585	0.656	8.05477e-18
Gnl3	3.31553e-22	0.254684	0.577	0.307	8.24042e-18
Prdx5	4.26671e-22	-0.349987	0.952	0.904	1.06045e-17
Bace2	4.88864e-22	-0.422114	0.152	0.329	1.21502e-17
2200002D01Rik	5.02589e-22	-0.468639	0.157	0.332	1.24913e-17
Bdh2	6.22442e-22	-0.507851	0.459	0.592	1.54702e-17
Dag1	7.42605e-22	0.251474	0.535	0.263	1.84567e-17
Spint1	1.05275e-21	-0.555527	0.552	0.646	2.61651e-17
Ly6h	1.07749e-21	-0.29783	0.994	0.98	2.67799e-17
Foxn3	1.14065e-21	0.260425	0.776	0.491	2.83498e-17
Slc2a1	1.14478e-21	-0.562956	0.371	0.531	2.84524e-17
Kcnh1	1.18029e-21	0.250236	0.386	0.133	2.93348e-17
Atp5k	1.42016e-21	0.261346	0.888	0.641	3.52968e-17
Rbbp6	1.54522e-21	0.254141	0.851	0.565	3.84049e-17
Med28	1.56771e-21	-0.432964	0.577	0.644	3.89638e-17
Taok1	1.74134e-21	0.253622	0.641	0.359	4.32793e-17
Myl9	1.80395e-21	0.285595	0.635	0.334	4.48354e-17
Sec61b	2.32556e-21	0.260213	0.949	0.717	5.77995e-17
Lgals3	2.73196e-21	-0.76487	0.657	0.727	6.79003e-17
D8Ertd738e	2.86203e-21	-0.399987	0.849	0.784	7.11329e-17
Smdt1	3.14462e-21	-0.346238	0.891	0.826	7.81563e-17
Baz1a	3.19326e-21	0.272031	0.288	0.064	7.93652e-17
Prdx4	3.2317e-21	0.273237	0.731	0.435	8.03206e-17
Fbxo6	4.20181e-21	-0.328356	0.13	0.297	1.04432e-16
Msi2	4.52983e-21	0.272964	0.867	0.577	1.12584e-16
Cdh2	5.34256e-21	0.269418	0.701	0.408	1.32784e-16
Tmem106c	5.73593e-21	-0.421345	0.462	0.582	1.42561e-16
Tm4sf1	6.49006e-21	-0.646135	0.81	0.845	1.61304e-16
Ccnd2	6.73945e-21	0.68291	0.695	0.504	1.67502e-16
Iffo2	7.89162e-21	-0.452364	0.232	0.403	1.96138e-16
Wnk1	8.2332e-21	0.272543	0.809	0.521	2.04628e-16
Irf2bpl	9.35843e-21	-0.482911	0.867	0.828	2.32594e-16
Cisd1	9.44517e-21	-0.419978	0.43	0.572	2.3475e-16
Baz1b	1.14739e-20	0.254988	0.475	0.221	2.85173e-16
Tnrc6a	1.19254e-20	0.250125	0.684	0.403	2.96393e-16
Gabarapl1	1.25065e-20	-0.489663	0.656	0.678	3.10836e-16
Usp1	1.43305e-20	0.262665	0.418	0.174	3.56169e-16
Anxa7	1.54666e-20	-0.494296	0.453	0.577	3.84407e-16
Rrm1	1.60241e-20	0.26986	0.264	0.054	3.98263e-16
Pde6d	1.69662e-20	-0.425011	0.389	0.536	4.21679e-16
Oaz2	1.99161e-20	-0.489145	0.492	0.592	4.94995e-16
Ybx1	2.05087e-20	0.25903	0.982	0.875	5.09724e-16
Pfn1	2.31779e-20	-0.325977	0.965	0.943	5.76062e-16
Cntln	2.50601e-20	0.256298	0.475	0.216	6.22844e-16
Ece1	2.8635e-20	-0.390297	0.873	0.818	7.11694e-16
Map1lc3b	2.88369e-20	-0.336265	0.953	0.916	7.16712e-16
Atf3	3.01868e-20	-0.681713	0.793	0.818	7.50263e-16
Fkbp8	4.31781e-20	-0.436179	0.751	0.735	1.07315e-15
Kmt2e	5.02654e-20	0.261195	0.795	0.506	1.2493e-15
Tcta	5.17786e-20	-0.313289	0.117	0.273	1.28691e-15
BC031181	5.49627e-20	-0.395814	0.638	0.681	1.36604e-15
Pmm1	5.8816e-20	-0.391431	0.296	0.464	1.46181e-15
Cd24a	6.74399e-20	-0.427907	0.973	0.941	1.67615e-15
Axl	9.3713e-20	-0.296237	0.121	0.275	2.32914e-15
Zfp36	1.03013e-19	-0.808583	0.806	0.757	2.56029e-15
Rab20	1.14511e-19	-0.396155	0.139	0.297	2.84605e-15
Pcbd2	1.17573e-19	-0.423206	0.343	0.504	2.92215e-15
Rell1	1.46975e-19	-0.401724	0.205	0.376	3.65293e-15
Ubald2	1.62971e-19	-0.525125	0.588	0.654	4.05048e-15
Cwc25	1.73867e-19	0.253284	0.389	0.152	4.32128e-15
Atp6ap1	1.78756e-19	-0.424694	0.357	0.506	4.44279e-15
Pttg1	2.88906e-19	-0.422129	0.257	0.432	7.18047e-15
Ifi35	3.74316e-19	-0.282322	0.131	0.29	9.30325e-15
Rgs3	4.33642e-19	-0.545282	0.276	0.445	1.07777e-14
Cxcl16	4.62949e-19	-0.524218	0.165	0.329	1.15061e-14
Dnmt1	7.16488e-19	0.252869	0.346	0.118	1.78076e-14
Hdgf	7.51566e-19	0.273077	0.893	0.681	1.86794e-14
Eef1g	7.54704e-19	-0.276717	0.986	0.889	1.87574e-14
Dusp1	8.73952e-19	-0.952302	0.566	0.668	2.17212e-14
Slc22a4	8.92553e-19	-0.352282	0.157	0.317	2.21835e-14
Rnf19b	9.12229e-19	-0.451661	0.124	0.273	2.26725e-14
Mad2l2	9.22051e-19	-0.382289	0.183	0.351	2.29167e-14
Tbc1d10a	9.94167e-19	-0.32172	0.151	0.312	2.4709e-14
Dynll1	1.20354e-18	0.259569	0.987	0.892	2.99127e-14
Gm10036	1.67588e-18	-0.324225	0.175	0.339	4.16523e-14
Wbp2	1.75369e-18	-0.440507	0.414	0.536	4.35861e-14
Chkb	2.31803e-18	-0.363611	0.217	0.386	5.76123e-14
Vti1b	2.38313e-18	-0.375213	0.384	0.528	5.92304e-14
Fdft1	3.23759e-18	-0.442559	0.298	0.455	8.04671e-14
Lamp2	3.81067e-18	-0.424231	0.741	0.73	9.47104e-14
Slc39a12	4.9136e-18	-0.289077	0.143	0.3	1.22123e-13
Il17re	5.06186e-18	-0.420924	0.305	0.455	1.25807e-13
Tnfsf12	5.14556e-18	-0.387823	0.257	0.415	1.27888e-13
Fam129b	5.85582e-18	-0.341729	0.139	0.287	1.45541e-13
Otud1	6.03555e-18	-0.569026	0.335	0.482	1.50007e-13
Tgif1	6.08763e-18	-0.682036	0.646	0.668	1.51302e-13
Fbxo32	6.66951e-18	0.280528	0.463	0.231	1.65764e-13
Hacd2	7.58338e-18	-0.404535	0.26	0.415	1.88477e-13
Pqlc1	9.33487e-18	-0.456043	0.28	0.442	2.32009e-13
Msmo1	9.73263e-18	-0.448978	0.308	0.474	2.41895e-13
Sec11c	1.04078e-17	-0.384843	0.349	0.491	2.58676e-13
Rab4a	1.15888e-17	-0.413973	0.419	0.531	2.88027e-13
Use1	1.20083e-17	-0.421684	0.637	0.654	2.98454e-13
Tns2	1.20492e-17	-0.269813	0.148	0.302	2.9947e-13
Tmod1	1.62632e-17	-0.435123	0.273	0.43	4.04205e-13
Chpt1	1.76578e-17	-0.392934	0.72	0.713	4.38866e-13
Kif5b	2.41463e-17	0.251135	0.898	0.656	6.00131e-13
Tmpo	3.53826e-17	0.276633	0.62	0.366	8.79399e-13
Tprgl	3.75308e-17	-0.380203	0.768	0.708	9.32789e-13
Rit2	4.05877e-17	-0.408447	0.269	0.435	1.00877e-12
Gsn	4.66979e-17	-0.307999	0.119	0.265	1.16063e-12
Tmem205	5.67301e-17	-0.427661	0.245	0.403	1.40997e-12
Gm2a	5.71684e-17	-0.470901	0.392	0.521	1.42086e-12
Smim1	6.52846e-17	-0.253979	0.137	0.29	1.62258e-12
Six3	7.7759e-17	0.280489	0.937	0.764	1.93262e-12
Fosl1	1.43404e-16	-0.704061	0.438	0.541	3.56417e-12
Pacsin3	1.50985e-16	-0.408727	0.19	0.339	3.75257e-12
Rbp1	1.88319e-16	0.259362	0.833	0.592	4.68049e-12
Ralgds	2.34569e-16	-0.398801	0.231	0.383	5.82998e-12
Runx1	2.67658e-16	-0.395022	0.287	0.442	6.65237e-12
Edf1	2.83602e-16	-0.346577	0.797	0.73	7.04865e-12
Cyb5r3	3.67099e-16	-0.411738	0.692	0.698	9.12389e-12
Chchd10	4.86033e-16	-0.336931	0.943	0.902	1.20799e-11
Gstm2	4.89839e-16	-0.518268	0.481	0.57	1.21745e-11
G6pdx	6.00509e-16	-0.268516	0.131	0.273	1.49251e-11
Mid1ip1	6.72781e-16	-0.423132	0.4	0.516	1.67213e-11
Lhx3	8.1357e-16	-0.497528	0.327	0.467	2.02205e-11
Ing2	1.22356e-15	-0.495142	0.556	0.634	3.04105e-11
Cpne2	1.26429e-15	-0.277333	0.119	0.256	3.14227e-11
Zbtb20	1.31467e-15	-0.296892	0.95	0.889	3.26749e-11
Pebp1	1.33562e-15	-0.286231	0.982	0.924	3.31955e-11
Fxyd1	1.83406e-15	-0.418954	0.384	0.511	4.55838e-11
Aldh1a1	1.93554e-15	-0.396296	0.29	0.44	4.81058e-11
Cd59a	2.01114e-15	0.307799	0.739	0.509	4.99848e-11
Slc6a8	2.05884e-15	-0.313794	0.185	0.334	5.11704e-11
Inhbb	2.77257e-15	-0.349005	0.223	0.366	6.89095e-11
Irgm1	2.90488e-15	-0.501724	0.16	0.297	7.21978e-11
Fkbp2	3.33113e-15	-0.379602	0.632	0.661	8.2792e-11
Tmem30b	3.40628e-15	-0.434975	0.386	0.496	8.46597e-11
Tpd52	3.47421e-15	-0.328473	0.769	0.744	8.6348e-11
Dynll2	4.05891e-15	-0.416046	0.714	0.681	1.0088e-10
Nucks1	4.36539e-15	0.275535	0.79	0.533	1.08498e-10
Pcp4	5.13608e-15	-0.367049	0.303	0.467	1.27652e-10
Npdc1	6.74181e-15	-0.382272	0.493	0.58	1.67561e-10
Plat	7.86105e-15	-0.411778	0.918	0.872	1.95379e-10
Slc1a4	8.14325e-15	-0.370116	0.236	0.376	2.02392e-10
M6pr	8.35261e-15	-0.356112	0.538	0.619	2.07596e-10
Slc48a1	8.63261e-15	-0.366659	0.328	0.459	2.14555e-10
Plekhb2	1.06067e-14	-0.28256	0.175	0.317	2.63619e-10
Txnrd1	1.16648e-14	-0.492992	0.66	0.681	2.89917e-10
Tmem59	1.18084e-14	-0.326399	0.939	0.855	2.93487e-10
Maff	1.3669e-14	-1.03914	0.728	0.668	3.3973e-10
March2	1.38892e-14	-0.369816	0.379	0.491	3.45202e-10
Gpx1	1.60098e-14	-0.391174	0.777	0.769	3.97907e-10
Spr	1.6743e-14	-0.392228	0.333	0.45	4.1613e-10
Cntn1	1.67663e-14	-0.341012	0.21	0.351	4.16711e-10
Ccdc34	1.80042e-14	0.326369	0.557	0.351	4.47476e-10
Qpct	1.92747e-14	-0.338547	0.19	0.334	4.79054e-10
Tram1	2.15123e-14	-0.365165	0.547	0.607	5.34666e-10
Nfkbia	2.20892e-14	-1.09709	0.857	0.796	5.49006e-10
Socs2	2.51446e-14	-0.367977	0.771	0.781	6.24943e-10
Spg21	4.01109e-14	-0.390786	0.537	0.58	9.96916e-10
Cystm1	4.72304e-14	-0.361066	0.79	0.752	1.17386e-09
Slc22a17	7.33186e-14	-0.372221	0.404	0.518	1.82226e-09
Gclc	7.60911e-14	-0.472388	0.502	0.577	1.89117e-09
Csrnp1	9.18173e-14	-0.554749	0.49	0.55	2.28203e-09
Arhgdia	1.01576e-13	-0.359803	0.631	0.668	2.52458e-09
Bola3	1.32049e-13	-0.410675	0.621	0.666	3.28195e-09
Cd164	1.6397e-13	-0.339428	0.702	0.678	4.0753e-09
Napa	1.84298e-13	-0.406993	0.449	0.528	4.58053e-09
Pim3	2.46105e-13	-0.436255	0.333	0.455	6.11669e-09
Plscr2	2.71341e-13	-0.316176	0.134	0.26	6.74392e-09
Nceh1	2.91812e-13	-0.342456	0.221	0.359	7.25271e-09
H2afx	3.57021e-13	0.371239	0.428	0.224	8.8734e-09
Scg5	4.14386e-13	-0.439864	0.496	0.595	1.02992e-08
Mafk	5.9829e-13	-0.383473	0.327	0.435	1.48699e-08
Nudt9	6.2888e-13	-0.306607	0.247	0.376	1.56302e-08
Ucp2	7.87904e-13	-0.315255	0.869	0.781	1.95826e-08
Arid5a	9.33868e-13	-0.494629	0.346	0.457	2.32103e-08
Tmem219	1.02692e-12	-0.359944	0.309	0.435	2.5523e-08
Tmem55b	1.45912e-12	-0.333388	0.255	0.378	3.62649e-08
Hist1h1c	1.47046e-12	-0.344822	0.223	0.371	3.65468e-08
Id1	1.57751e-12	-0.570878	0.359	0.477	3.92075e-08
Gaa	1.96415e-12	-0.372373	0.411	0.518	4.8817e-08
Oat	2.69159e-12	-0.343303	0.757	0.742	6.68968e-08
Tmem238	2.98459e-12	-0.382401	0.504	0.555	7.4179e-08
Klf13	3.52467e-12	-0.413727	0.877	0.769	8.76021e-08
Prkca	4.39947e-12	-0.264082	0.149	0.27	1.09344e-07
Gabarapl2	4.86311e-12	-0.255988	0.88	0.801	1.20868e-07
Sh3glb2	5.41997e-12	-0.289091	0.282	0.405	1.34708e-07
Krt18	6.0046e-12	-0.627956	0.991	0.961	1.49238e-07
Pttg1ip	6.44473e-12	-0.501793	0.586	0.607	1.60177e-07
Oaf	6.47205e-12	-0.290805	0.16	0.28	1.60856e-07
Vasp	6.91212e-12	-0.461576	0.557	0.585	1.71794e-07
Sox9	6.99895e-12	-0.489604	0.525	0.597	1.73952e-07
Aars	1.32309e-11	-0.276016	0.187	0.312	3.28841e-07
Cgn	1.3751e-11	-0.351918	0.43	0.516	3.41768e-07
Camk2d	1.39013e-11	-0.381349	0.737	0.703	3.45503e-07
Efna1	1.74508e-11	-0.331872	0.249	0.369	4.33723e-07
Atp6v0b	1.75229e-11	-0.344451	0.661	0.671	4.35515e-07
Clic4	1.95904e-11	-0.431093	0.411	0.489	4.86901e-07
Trp53inp2	2.20388e-11	-0.277974	0.251	0.373	5.47751e-07
Mien1	2.39861e-11	-0.323014	0.454	0.518	5.96149e-07
Emd	2.42884e-11	-0.891227	0.768	0.71	6.03664e-07
Stx4a	2.68212e-11	-0.348167	0.403	0.491	6.66615e-07
Hes1	2.84805e-11	0.299398	0.861	0.72	7.07854e-07
Ifi27l2a	2.98687e-11	-0.339441	0.268	0.405	7.42357e-07
Cib1	3.0813e-11	-0.29379	0.25	0.369	7.65825e-07
Ube2d3	3.16566e-11	-0.29239	0.94	0.897	7.86793e-07
Tmem14a	3.67132e-11	-0.321523	0.231	0.351	9.1247e-07
Rab6a	4.37999e-11	-0.356908	0.863	0.791	1.0886e-06
Tspan7	5.26127e-11	-0.414637	0.429	0.499	1.30764e-06
Jup	6.01792e-11	-0.361648	0.434	0.511	1.49569e-06
2610001J05Rik	6.45844e-11	-0.325426	0.363	0.464	1.60518e-06
Crlf1	6.94662e-11	-0.582526	0.462	0.516	1.72651e-06
Mif4gd	9.06694e-11	-0.311764	0.232	0.346	2.2535e-06
Fam174a	9.50599e-11	-0.318963	0.354	0.455	2.36262e-06
Tob1	9.68794e-11	-0.385625	0.434	0.523	2.40784e-06
Sdc1	1.1445e-10	-0.341524	0.226	0.342	2.84454e-06
Socs3	1.35561e-10	-0.864515	0.434	0.516	3.36924e-06
Cald1	2.01078e-10	0.275084	0.924	0.749	4.9976e-06
Pcsk1n	2.2724e-10	-0.71285	0.292	0.396	5.64783e-06
Glmp	2.6473e-10	-0.350823	0.389	0.482	6.57961e-06
Elovl5	2.78456e-10	-0.334367	0.251	0.369	6.92074e-06
Prcp	2.85639e-10	-0.254644	0.145	0.253	7.09927e-06
Chmp4b	3.62994e-10	-0.26843	0.843	0.754	9.02184e-06
Xbp1	4.14039e-10	-0.372515	0.558	0.592	1.02905e-05
Ctf1	4.31872e-10	-0.359002	0.371	0.457	1.07338e-05
Srp14	4.54246e-10	-0.290124	0.756	0.695	1.12898e-05
Rab11b	4.8549e-10	-0.289723	0.88	0.808	1.20664e-05
Epas1	6.11497e-10	-0.334285	0.398	0.486	1.51981e-05
Fam3c	6.55027e-10	-0.324298	0.789	0.727	1.628e-05
Sdf4	7.03345e-10	-0.342937	0.622	0.624	1.74809e-05
Dctn6	7.36909e-10	0.266374	0.899	0.776	1.83151e-05
Egln2	7.54061e-10	-0.370568	0.47	0.526	1.87414e-05
Ltbp4	8.09367e-10	-0.385936	0.554	0.582	2.0116e-05
Hk1	9.01435e-10	-0.321064	0.354	0.445	2.24043e-05
Gdi1	1.12307e-09	-0.310418	0.303	0.41	2.79128e-05
Pcdh17	1.22485e-09	-0.299491	0.435	0.528	3.04424e-05
Odc1	1.33577e-09	-0.295034	0.874	0.789	3.31993e-05
Krt17	1.35628e-09	-1.12727	0.334	0.437	3.37089e-05
Tex264	1.73802e-09	-0.333147	0.267	0.371	4.31968e-05
Proser2	1.74853e-09	-0.301398	0.263	0.364	4.34579e-05
1810037I17Rik	1.81247e-09	-0.265957	0.836	0.786	4.50471e-05
Camk1	2.69303e-09	-0.364871	0.542	0.56	6.69327e-05
Fundc1	3.09849e-09	-0.253998	0.285	0.398	7.70099e-05
Cdkn1a	3.42475e-09	-0.55037	0.291	0.393	8.51188e-05
Vamp2	3.74772e-09	-0.332249	0.368	0.45	9.31458e-05
Pitpnc1	4.07756e-09	-0.28058	0.441	0.514	0.000101344
Abhd16a	4.27187e-09	-0.342204	0.437	0.501	0.000106173
Mzt2	4.42712e-09	-0.572086	0.273	0.376	0.000110032
Vapb	4.71766e-09	-0.340686	0.556	0.568	0.000117253
Atp6v1f	4.72268e-09	-0.257791	0.909	0.821	0.000117378
Ppp1r2	5.15462e-09	-0.325056	0.736	0.678	0.000128113
Rab1a	5.28374e-09	-0.297563	0.723	0.686	0.000131322
Ddrgk1	5.30724e-09	-0.347227	0.611	0.592	0.000131906
Ddit3	5.63455e-09	-0.424524	0.379	0.464	0.000140041
Cish	6.03522e-09	-0.309372	0.256	0.354	0.000149999
Fads1	6.31734e-09	-0.268177	0.263	0.361	0.000157011
Cops7a	9.18367e-09	-0.333186	0.51	0.538	0.000228251
Rnh1	1.0453e-08	-0.375392	0.679	0.649	0.000259799
Vkorc1	1.07159e-08	-0.343583	0.479	0.533	0.000266333
Atf5	1.07611e-08	-0.415663	0.233	0.334	0.000267456
Tifa	1.52315e-08	-0.311455	0.273	0.371	0.000378563
Fam46b	1.73414e-08	-0.289748	0.227	0.327	0.000431004
Tmem184a	1.95767e-08	-0.252892	0.213	0.314	0.000486559
Tril	2.12928e-08	-0.382122	0.308	0.391	0.000529212
Gipc1	2.28234e-08	-0.299942	0.436	0.499	0.000567254
Egr1	2.62029e-08	-0.268175	0.786	0.835	0.000651246
Bmyc	2.93441e-08	-0.309579	0.441	0.494	0.000729319
Mdfi	3.15389e-08	-0.360339	0.197	0.292	0.000783869
Ndrg2	3.44637e-08	-0.317677	0.733	0.698	0.00085656
Tagln2	3.76878e-08	-0.348792	0.772	0.786	0.000936692
Fuca1	3.8861e-08	-0.291783	0.51	0.553	0.000965851
Tmem109	3.97635e-08	-0.308622	0.293	0.378	0.000988283
Cox17	3.98464e-08	-0.311231	0.535	0.577	0.000990342
Degs1	4.56728e-08	-0.317292	0.31	0.4	0.00113515
Smarcd3	4.88256e-08	-0.261458	0.277	0.373	0.00121351
Tmx2	5.29345e-08	-0.255373	0.204	0.302	0.00131563
Atox1	6.25995e-08	-0.323033	0.843	0.752	0.00155585
Lsm6	6.31495e-08	-0.272911	0.58	0.592	0.00156952
St3gal5	6.90658e-08	-0.315631	0.354	0.435	0.00171656
Cpe	7.94451e-08	-0.320871	0.645	0.644	0.00197453
Tmem141	8.35843e-08	-0.340042	0.432	0.484	0.0020774
Smox	8.44328e-08	-0.271554	0.224	0.319	0.00209849
Rnf5	8.54517e-08	-0.270888	0.283	0.373	0.00212382
Pdpn	8.63238e-08	-0.45533	0.479	0.518	0.00214549
Nr4a1	9.05193e-08	-0.334635	0.853	0.826	0.00224977
Hspe1	1.01901e-07	-0.685658	0.948	0.816	0.00253264
Ndrg1	1.03398e-07	-0.390572	0.284	0.371	0.00256985
Ndufs8	1.07221e-07	-0.325803	0.525	0.555	0.00266487
Prkaca	1.09505e-07	-0.30474	0.349	0.425	0.00272164
Crb3	1.12443e-07	-0.35094	0.472	0.514	0.00279467
Emc8	1.20804e-07	-0.304138	0.679	0.651	0.00300246
Csf2ra	1.2274e-07	-0.262852	0.215	0.307	0.00305059
Srsf5	1.43381e-07	-0.267626	0.935	0.867	0.00356359
Pmvk	1.72864e-07	-0.694275	0.535	0.545	0.00429635
Cdo1	1.82686e-07	-0.387791	0.267	0.349	0.00454048
Ifi27	1.88424e-07	-0.266296	0.81	0.776	0.0046831
Enpp5	1.91728e-07	-0.352676	0.386	0.442	0.00476521
Tmem160	2.12035e-07	-0.292208	0.396	0.452	0.00526993
Pon2	2.18988e-07	-0.282256	0.297	0.378	0.00544272
Acsf2	2.34626e-07	-0.27291	0.275	0.361	0.0058314
Ahsa1	2.55273e-07	-0.279882	0.41	0.459	0.00634456
Kank1	2.56591e-07	-0.270257	0.289	0.366	0.0063773
Sfxn3	2.7778e-07	-0.253979	0.183	0.27	0.00690395
Coq10b	2.84749e-07	-0.484395	0.832	0.742	0.00707716
Lgals1	3.07429e-07	-0.293772	0.379	0.462	0.00764083
Mafg	3.11911e-07	-0.356273	0.46	0.494	0.00775223
Thbs1	3.58817e-07	-0.604268	0.753	0.681	0.00891804
Crip2	3.63143e-07	-0.252414	0.914	0.828	0.00902555
Tnfaip2	4.35828e-07	-0.277099	0.269	0.366	0.0108321
Hsp90aa1	4.37026e-07	-0.617094	0.982	0.939	0.0108618
Fbxo9	5.45363e-07	-0.284174	0.365	0.43	0.0135544
Hpcal1	5.70114e-07	-0.305604	0.316	0.393	0.0141696
Txndc5	6.97791e-07	-0.330828	0.505	0.518	0.0173429
Tmbim4	7.14374e-07	-0.300262	0.418	0.467	0.017755
Mapk6	7.2647e-07	-0.308352	0.343	0.396	0.0180557
Tapbp	7.34662e-07	-0.284603	0.531	0.545	0.0182593
Sptssa	7.88845e-07	-0.264358	0.7	0.666	0.019606
Map2k1	8.24606e-07	-0.27621	0.328	0.396	0.0204948
Adipor1	8.74636e-07	-0.292459	0.485	0.511	0.0217382
Gpm6b	8.8215e-07	-0.326648	0.481	0.504	0.021925
Psen2	8.92413e-07	-0.277041	0.34	0.415	0.02218
Gadd45b	9.37104e-07	-0.412299	0.652	0.681	0.0232908
Atraid	1.13201e-06	-0.318729	0.717	0.646	0.028135
Ramp1	1.2726e-06	-0.348641	0.431	0.482	0.0316292
Ndufv3	1.27636e-06	-0.285228	0.599	0.582	0.0317227
Pgpep1	1.56295e-06	-0.269615	0.232	0.31	0.0388457
Vmp1	1.62591e-06	-0.443178	0.76	0.722	0.0404104
Prmt2	1.66353e-06	-0.27943	0.298	0.376	0.0413455
Tns1	1.67468e-06	-0.27867	0.366	0.43	0.0416224
Isg15	1.75482e-06	-0.336428	0.183	0.275	0.0436142
Zfp36l2	1.84712e-06	0.258915	0.746	0.595	0.0459083
H13	2.17672e-06	-0.296197	0.459	0.494	0.0541001
Zcchc18	2.41282e-06	-0.300891	0.44	0.482	0.0599681
Wdr1	2.48455e-06	-0.321531	0.7	0.639	0.0617509
Atp6v0e2	2.64108e-06	-0.268173	0.307	0.376	0.0656413
Ccnl1	2.69252e-06	-0.326071	0.812	0.722	0.0669199
Clpp	2.8936e-06	-0.284693	0.382	0.437	0.0719175
Guk1	3.41392e-06	-0.264706	0.579	0.568	0.0848497
Tsc22d3	3.47276e-06	-0.311189	0.628	0.607	0.0863119
Hdac3	3.82608e-06	-0.309446	0.454	0.477	0.0950935
Stat3	4.28708e-06	-0.337909	0.772	0.688	0.106551
Lgals3bp	4.44381e-06	-0.31486	0.46	0.496	0.110447
B4galt5	4.75582e-06	-0.358288	0.467	0.491	0.118201
Hdac11	4.94822e-06	-0.299767	0.335	0.396	0.122983
Nadk	6.51559e-06	-0.268124	0.285	0.354	0.161938
Usp2	7.32312e-06	-0.377248	0.505	0.526	0.182009
Gh	7.4274e-06	-2.09875	0.283	0.14	0.184601
Stx3	8.20307e-06	-0.276819	0.436	0.486	0.203879
Slc27a1	8.57475e-06	-0.279969	0.497	0.518	0.213117
Klf4	8.73842e-06	-0.501343	0.676	0.646	0.217185
Sh3bgrl3	1.02375e-05	-0.289693	0.609	0.585	0.254443
Rheb	1.12545e-05	-0.3372	0.926	0.853	0.27972
Snapin	1.18189e-05	-0.251597	0.278	0.346	0.293748
N4bp3	1.23236e-05	-0.2597	0.194	0.265	0.306291
Lrpap1	1.35653e-05	-0.270686	0.761	0.686	0.337151
Pld3	1.37376e-05	-0.250165	0.347	0.403	0.341435
Eps8l1	1.56587e-05	-0.334166	0.285	0.342	0.389182
Nr1h2	1.68429e-05	-0.284019	0.348	0.396	0.418613
Gnb1	1.88088e-05	-0.337439	0.903	0.774	0.467475
Cd99l2	1.94571e-05	-0.250757	0.334	0.378	0.483587
Dazap2	2.2268e-05	-0.277189	0.717	0.651	0.55345
Apbb1	2.69532e-05	-0.281058	0.437	0.474	0.669894
Itpkc	3.6806e-05	-0.293803	0.212	0.278	0.914776
Gpha2	3.8226e-05	-0.643701	0.255	0.314	0.950068
Angptl4	3.84144e-05	-0.468511	0.334	0.381	0.954752
Tspan13	3.84347e-05	-0.260327	0.582	0.568	0.955257
Stard3nl	3.96699e-05	-0.284297	0.376	0.418	0.985956
Nid2	4.11012e-05	-0.26861	0.356	0.4	1
Tnfrsf12a	4.42127e-05	-0.432004	0.755	0.693	1
Cldn7	4.67195e-05	-0.520636	0.852	0.806	1
Hexb	4.93233e-05	-0.302816	0.361	0.403	1
Card19	4.96021e-05	-0.272032	0.548	0.541	1
Btg2	5.0338e-05	-0.435815	0.941	0.909	1
Rcn2	5.94312e-05	-0.253478	0.843	0.732	1
Apobec3	7.00806e-05	-0.289529	0.29	0.346	1
Cotl1	7.21908e-05	-0.258129	0.277	0.339	1
P2rx2	7.74074e-05	-0.251432	0.21	0.27	1
St14	7.87477e-05	-0.251892	0.391	0.428	1
Fcgrt	8.02327e-05	-0.294011	0.667	0.607	1
Foxo1	9.69732e-05	-0.270969	0.313	0.373	1
Atf4	0.000140243	-0.253305	0.884	0.754	1
Bcap31	0.000142007	-0.27925	0.719	0.629	1
Ccdc12	0.000149898	-0.27657	0.625	0.563	1
Smim22	0.000161231	-0.253906	0.495	0.518	1
Mknk2	0.000183009	-0.319686	0.414	0.43	1
Klhdc8b	0.000192245	-0.267629	0.444	0.467	1
Lamc2	0.000289144	-0.345608	0.473	0.472	1
Slc25a25	0.000299287	-0.317355	0.561	0.548	1
Tiparp	0.000390693	-0.375323	0.496	0.499	1
Cyr61	0.000436282	-0.481679	0.838	0.767	1
Emc4	0.000438125	-0.25366	0.421	0.437	1
Wbp1	0.000708832	-0.251742	0.44	0.45	1
Msx1	0.000814363	-0.290128	0.806	0.73	1
Csrp1	0.0011037	-0.292873	0.883	0.803	1
Herpud1	0.00118913	-0.254608	0.711	0.641	1
Mrps18a	0.0013224	-0.26259	0.441	0.447	1
Stk40	0.00138201	-0.26759	0.322	0.361	1
Fam129a	0.00138331	-0.253001	0.609	0.57	1
Pvr	0.00147511	-0.273185	0.551	0.506	1
Unc45a	0.00161268	-0.260834	0.441	0.44	1
Pde4b	0.00183875	-0.433948	0.539	0.496	1
Hey1	0.00203775	-0.269897	0.636	0.614	1
Nfil3	0.00245299	-0.280674	0.487	0.484	1
Ier5	0.00298243	-0.308419	0.619	0.572	1
Hsd11b1	0.00299968	-0.38985	0.645	0.609	1
Cstb	0.00304257	-0.274639	0.835	0.727	1
Ssh1	0.00333288	-0.272284	0.244	0.28	1
Wdr89	0.00552017	-0.258285	0.694	0.617	1
Mast4	0.00615865	-0.373086	0.696	0.604	1
Hbegf	0.00799618	-0.385516	0.331	0.361	1
Bcar1	0.00921584	-0.272851	0.29	0.312	1
Nfkb1	0.00929786	-0.27899	0.363	0.381	1
Fam173a	0.00953761	-0.252218	0.574	0.521	1
Gm10076	0.0110436	-0.265987	0.649	0.541	1
Meg3	0.014011	-0.278206	0.984	0.894	1
Timp1	0.0152255	-0.472804	0.222	0.256	1
Rcn3	0.0170104	-0.251672	0.459	0.447	1
Arl4c	0.0205735	-0.277102	0.5	0.464	1
Map7d1	0.0252737	-0.25192	0.431	0.413	1
Siah2	0.0254072	-0.251211	0.415	0.405	1
Tubb2a	0.0378329	-0.328191	0.823	0.737	1
Edn2	0.0440283	-0.344855	0.581	0.44	1
Errfi1	0.0472516	-0.363821	0.889	0.742	1
Rab11fip1	0.0551377	-0.287346	0.327	0.329	1
Pdk4	0.0626692	-0.252724	0.247	0.263	1
Sbds	0.0661396	-0.273144	0.486	0.447	1
Cx3cl1	0.0677502	-0.302791	0.771	0.654	1
Bambi	0.0699043	-0.282484	0.271	0.287	1
Jun	0.0728262	-0.338674	0.969	0.889	1
Kdm6b	0.123355	-0.478601	0.676	0.565	1
Txnip	0.134379	-0.27916	0.669	0.617	1
Krt8	0.226052	-0.250077	0.951	0.904	1
Crem	0.235698	-0.335772	0.551	0.474	1
Arc	0.278806	-0.272281	0.795	0.602	1
Serpinh1	0.314317	-0.518301	0.829	0.668	1
Pim1	0.323427	-0.296818	0.647	0.577	1
Tubb6	0.330612	-0.279661	0.281	0.278	1
Fas	0.359471	-0.430962	0.643	0.541	1
Irf1	0.545061	-0.29176	0.496	0.459	1
Tceal8	0.546393	-0.320404	0.871	0.749	1
Cldn4	0.596395	-0.983752	0.491	0.408	1
Lmna	0.707988	-0.387339	0.793	0.656	1

## Sheet: B
GO analysis of genes upregulated in neonatal versus adult SC1+SC2+Prolif SC
Pathway name	#Entities found	#Entities total	Entities ratio	Entities pValue	Entities FDR	-log10(FDR)
Formation of a pool of free 40S subunits	82	106	0.00742765	1.11022e-16	4.77396e-15	14.3211
Nonsense Mediated Decay (NMD) independent of the Exon Junction Complex (EJC)	77	101	0.00707729	1.11022e-16	4.77396e-15	14.3211
Formation of the ternary complex, and subsequently, the 43S complex	40	54	0.0037839	1.11022e-16	4.77396e-15	14.3211
GTP hydrolysis and joining of the 60S ribosomal subunit	85	120	0.00840866	1.11022e-16	4.77396e-15	14.3211
L13a-mediated translational silencing of Ceruloplasmin expression	84	120	0.00840866	1.11022e-16	4.77396e-15	14.3211
Translation initiation complex formation	41	62	0.00434447	1.11022e-16	4.77396e-15	14.3211
Nonsense-Mediated Decay (NMD)	81	124	0.00868895	1.11022e-16	4.77396e-15	14.3211
Nonsense Mediated Decay (NMD) enhanced by the Exon Junction Complex (EJC)	81	124	0.00868895	1.11022e-16	4.77396e-15	14.3211
Viral mRNA Translation	74	114	0.00798823	1.11022e-16	4.77396e-15	14.3211
SRP-dependent cotranslational protein targeting to membrane	77	119	0.00833859	1.11022e-16	4.77396e-15	14.3211
Ribosomal scanning and start codon recognition	41	64	0.00448462	1.11022e-16	4.77396e-15	14.3211
Major pathway of rRNA processing in the nucleolus and cytosol	83	189	0.0132436	1.11022e-16	4.77396e-15	14.3211
Eukaryotic Translation Initiation	85	130	0.00910938	1.11022e-16	4.77396e-15	14.3211
Cap-dependent Translation Initiation	85	130	0.00910938	1.11022e-16	4.77396e-15	14.3211
Eukaryotic Translation Elongation	76	102	0.00714736	1.11022e-16	4.77396e-15	14.3211
Activation of the mRNA upon binding of the cap-binding complex and eIFs, and subsequent binding to 43S	41	66	0.00462476	1.11022e-16	4.77396e-15	14.3211
Peptide chain elongation	75	97	0.006797	1.11022e-16	4.77396e-15	14.3211
Eukaryotic Translation Termination	76	106	0.00742765	1.11022e-16	4.77396e-15	14.3211
rRNA processing in the nucleus and cytosol	83	207	0.0145049	1.11022e-16	4.77396e-15	14.3211
Translation	96	339	0.0237545	1.11022e-16	4.77396e-15	14.3211
Cellular response to starvation	77	176	0.0123327	1.11022e-16	4.77396e-15	14.3211
Metabolism of RNA	172	783	0.0548665	1.11022e-16	4.77396e-15	14.3211
rRNA processing	91	245	0.0171677	1.11022e-16	4.77396e-15	14.3211
Influenza Viral RNA Transcription and Replication	81	176	0.0123327	1.11022e-16	4.77396e-15	14.3211
Axon guidance	118	585	0.0409922	1.11022e-16	4.77396e-15	14.3211
Response of EIF2AK4 (GCN2) to amino acid deficiency	75	115	0.0080583	1.11022e-16	4.77396e-15	14.3211
Nervous system development	118	621	0.0435148	1.11022e-16	4.77396e-15	14.3211
Regulation of expression of SLITs and ROBOs	87	183	0.0128232	1.11022e-16	4.77396e-15	14.3211
Cellular responses to stress	147	952	0.0667087	1.11022e-16	4.77396e-15	14.3211
Selenocysteine synthesis	74	112	0.00784808	1.11022e-16	4.77396e-15	14.3211
Cellular responses to stimuli	147	970	0.06797	1.11022e-16	4.77396e-15	14.3211
Influenza Infection	81	200	0.0140144	1.11022e-16	4.77396e-15	14.3211
Signaling by ROBO receptors	89	235	0.016467	1.11022e-16	4.77396e-15	14.3211
Selenoamino acid metabolism	76	180	0.012613	1.11022e-16	4.77396e-15	14.3211
mRNA Splicing - Major Pathway	47	185	0.0129634	5.27356e-13	2.21489e-11	10.6546
mRNA Splicing	48	196	0.0137341	1.07059e-12	4.28235e-11	10.3683
Processing of Capped Intron-Containing Pre-mRNA	55	256	0.0179385	3.69293e-12	1.44024e-10	9.84156
Developmental Biology	157	1263	0.0885012	4.49847e-11	1.70942e-09	8.76715
Chromatin modifying enzymes	48	256	0.0179385	6.50517e-09	2.34186e-07	6.63044
Chromatin organization	48	256	0.0179385	6.50517e-09	2.34186e-07	6.63044
Metabolism of amino acids and derivatives	84	665	0.046598	1.16821e-06	4.08874e-05	4.38841
PKMTs methylate histone lysines	15	49	0.00343354	5.02841e-06	0.000175994	3.7545
mRNA Splicing - Minor Pathway	16	56	0.00392404	5.79497e-06	0.000197029	3.70547
Infectious disease	143	1357	0.0950879	6.00502e-06	0.000198166	3.70297
Downregulation of SMAD2/3:SMAD4 transcriptional activity	12	33	0.00231238	8.2009e-06	0.000254228	3.59478
Formation of ATP by chemiosmotic coupling	10	23	0.00161166	1.02199e-05	0.000316818	3.49919
RMTs methylate histone arginines	15	53	0.00371383	1.25111e-05	0.000375333	3.42558
RHOBTB1 GTPase cycle	10	24	0.00168173	1.46616e-05	0.000439848	3.3567
RHOBTB GTPase Cycle	12	36	0.0025226	1.91407e-05	0.00055508	3.25564
Oxidative Stress Induced Senescence	22	114	0.00798823	5.18966e-05	0.0014531	2.8377
Metabolism of proteins	206	2205	0.154509	9.28271e-05	0.00259916	2.58517
Transcriptional activity of SMAD2/SMAD3:SMAD4 heterotrimer	14	57	0.00399411	0.000106628	0.00286156	2.5434
Cohesin Loading onto Chromatin	6	10	0.000700722	0.00011006	0.00286156	2.5434
SUMO E3 ligases SUMOylate target proteins	29	183	0.0128232	0.000119368	0.00301597	2.52057
Cristae formation	10	31	0.00217224	0.000120639	0.00301597	2.52057
Gene and protein expression by JAK-STAT signaling after Interleukin-12 stimulation	16	73	0.00511527	0.000130199	0.00313054	2.50438
Epigenetic regulation of gene expression	24	139	0.00974003	0.000130439	0.00313054	2.50438
NOTCH4 Intracellular Domain Regulates Transcription	9	26	0.00182188	0.000155639	0.00373534	2.42767
TCF dependent signaling in response to WNT	32	216	0.0151356	0.000181146	0.00421833	2.37486
Downregulation of ERBB4 signaling	6	11	0.000770794	0.000183405	0.00421833	2.37486
RUNX3 regulates NOTCH signaling	7	16	0.00112115	0.000207298	0.00476785	2.32168
SUMOylation	29	192	0.0134539	0.000261238	0.00574724	2.24054
RUNX1 regulates genes involved in megakaryocyte differentiation and platelet function	16	78	0.00546563	0.000269891	0.00593759	2.22639
Transcriptional regulation by RUNX1	36	261	0.0182888	0.000284694	0.00626326	2.2032
PTEN Regulation	26	171	0.0119823	0.000481061	0.0101023	1.99558
PRC2 methylates histones and DNA	11	44	0.00308318	0.000488268	0.0102536	1.98912
Defective pyroptosis	12	52	0.00364375	0.000556244	0.0116811	1.93252
Interleukin-12 signaling	16	84	0.00588606	0.000594246	0.0124792	1.90381
Regulation of gene expression in late stage (branching morphogenesis) pancreatic bud precursor cells	7	20	0.00140144	0.000771124	0.0154225	1.81185
Signaling by TGF-beta Receptor Complex	16	87	0.00609628	0.000854802	0.017096	1.7671
Transcriptional regulation of granulopoiesis	14	71	0.00497512	0.000920767	0.0175569	1.75555
Mitotic Telophase/Cytokinesis	6	15	0.00105108	0.000924049	0.0175569	1.75555
Regulation of PTEN localization	5	10	0.000700722	0.000927888	0.0176299	1.75375
Positive epigenetic regulation of rRNA expression	15	80	0.00560577	0.00101247	0.0192369	1.71586
RHO GTPases activate PKNs	15	80	0.00560577	0.00101247	0.0192369	1.71586
Diseases of programmed cell death	16	90	0.0063065	0.0012067	0.0217206	1.66313
Estrogen-dependent gene expression	23	154	0.0107911	0.00124248	0.0223646	1.65044
NOTCH2 intracellular domain regulates transcription	6	16	0.00112115	0.00128082	0.0230548	1.63724
Signaling by NOTCH4	16	92	0.00644664	0.00150369	0.0270663	1.56757
Defective binding of RB1 mutants to E2F1,(E2F2, E2F3)	6	17	0.00119123	0.0017343	0.0294831	1.53043
Aberrant regulation of mitotic G1/S transition in cancer due to RB1 defects	6	17	0.00119123	0.0017343	0.0294831	1.53043
Nectin/Necl trans heterodimerization	4	7	0.000490505	0.00186824	0.0317601	1.49812
RHO GTPases Activate ROCKs	7	24	0.00168173	0.00215813	0.0365444	1.43718
Signaling by NOTCH2	9	38	0.00266274	0.00221109	0.0365444	1.43718
Interleukin-12 family signaling	16	96	0.00672693	0.00228403	0.0365444	1.43718
B-WICH complex positively regulates rRNA expression	12	62	0.00434447	0.00240327	0.0373127	1.42814
Cell Cycle	75	734	0.051433	0.0024062	0.0373127	1.42814
Apoptotic execution phase	11	54	0.0037839	0.0024408	0.0373127	1.42814
Respiratory electron transport, ATP synthesis by chemiosmotic coupling, and heat production by uncoupling proteins.	22	153	0.010721	0.00246779	0.0373127	1.42814
Cell Cycle, Mitotic	63	596	0.041763	0.00248752	0.0373127	1.42814
RUNX1 interacts with co-factors whose precise effect on RUNX1 targets is not known	9	39	0.00273281	0.00262257	0.0393386	1.40518
Sema4D induced cell migration and growth-cone collapse	7	25	0.0017518	0.00270044	0.0405066	1.39247
Pre-NOTCH Transcription and Translation	15	89	0.00623642	0.00277822	0.0416733	1.38014
Nuclear signaling by ERBB4	10	47	0.00329339	0.00277994	0.0416991	1.37987
Establishment of Sister Chromatid Cohesion	5	13	0.000910938	0.00288515	0.0432772	1.36374
Signaling by WNT	39	332	0.023264	0.00299526	0.0449288	1.34747
Transcriptional regulation by RUNX3	18	118	0.00826852	0.00321016	0.0449423	1.34734
Signaling by NOTCH	32	259	0.0181487	0.00329516	0.0461323	1.33599
Signaling by ERBB4	14	82	0.00574592	0.00337458	0.0472441	1.32565
Potential therapeutics for SARS	15	91	0.00637657	0.00340228	0.0476319	1.3221
NOTCH1 Intracellular Domain Regulates Transcription	11	57	0.00399411	0.00365058	0.0511081	1.29151
Smooth Muscle Contraction	10	49	0.00343354	0.00371368	0.0519916	1.28407
M Phase	46	416	0.02915	0.00411561	0.0549875	1.25974
Oncogene Induced Senescence	9	42	0.00294303	0.00422981	0.0549875	1.25974
RNA Polymerase II Transcription Termination	12	67	0.00469484	0.00441673	0.0574175	1.24096
Apoptosis	25	192	0.0134539	0.00464597	0.0603976	1.21898
SUMOylation of transcription cofactors	9	44	0.00308318	0.00566984	0.073708	1.13249
RHOC GTPase cycle	13	79	0.0055357	0.0062082	0.0802676	1.09546
RHO GTPase Effectors	37	326	0.0228435	0.00638923	0.0802676	1.09546
tRNA processing in the mitochondrion	9	45	0.00315325	0.00651869	0.0802676	1.09546
SLBP independent Processing of Histone Pre-mRNAs	4	10	0.000700722	0.00656221	0.0802676	1.09546
Meiotic synapsis	11	62	0.00434447	0.00668897	0.0802676	1.09546
Mitochondrial biogenesis	18	128	0.00896924	0.00718582	0.0831445	1.08017
Transcriptional Regulation by TP53	51	487	0.0341251	0.00722852	0.0831445	1.08017
HIV Life Cycle	23	179	0.0125429	0.00746397	0.0831445	1.08017
HDACs deacetylate histones	11	63	0.00441455	0.00748382	0.0831445	1.08017
Apoptotic cleavage of cellular proteins	8	38	0.00266274	0.00751324	0.0831445	1.08017
Signaling by WNT in cancer	8	38	0.00266274	0.00751324	0.0831445	1.08017
SUMOylation of DNA damage response and repair proteins	13	81	0.00567585	0.00755267	0.0831445	1.08017
Cellular Senescence	25	200	0.0140144	0.00755859	0.0831445	1.08017
Degradation of beta-catenin by the destruction complex	14	91	0.00637657	0.00808603	0.0889464	1.05087
Sema4D in semaphorin signaling	7	31	0.00217224	0.00842691	0.092696	1.03294
RHOBTB2 GTPase cycle	6	24	0.00168173	0.00900538	0.0990592	1.00411
SLBP Dependent Processing of Replication-Dependent Histone Pre-mRNAs	4	11	0.000770794	0.00908011	0.0998812	1.00052
Regulation of mRNA stability by proteins that bind AU-rich elements	14	93	0.00651671	0.00963219	0.105954	0.974882
rRNA processing in the mitochondrion	8	40	0.00280289	0.0100066	0.107094	0.970233
NADE modulates death signalling	3	6	0.000420433	0.0100281	0.107094	0.970233
RHOB GTPase cycle	12	75	0.00525541	0.0102351	0.107094	0.970233
Metabolism of non-coding RNA	11	66	0.00462476	0.0103151	0.107094	0.970233
snRNP Assembly	11	66	0.00462476	0.0103151	0.107094	0.970233
Gene expression (Transcription)	161	1855	0.129984	0.0107094	0.107094	0.970233
Formation of the beta-catenin:TCF transactivating complex	11	67	0.00469484	0.0114217	0.114217	0.94227
Disease	205	2431	0.170345	0.0126961	0.126961	0.896331
Signaling by TGFB family members	16	116	0.00812837	0.0127604	0.127604	0.894136
RNA Polymerase I Promoter Opening	7	34	0.00238245	0.0134007	0.134007	0.872872
Beta-catenin phosphorylation cascade	5	19	0.00133137	0.0135375	0.135375	0.868462
Protein methylation	5	19	0.00133137	0.0135375	0.135375	0.868462
Cyclin D associated events in G1	9	51	0.00357368	0.0138188	0.138188	0.859529
G1 Phase	9	51	0.00357368	0.0138188	0.138188	0.859529
Mitotic Prometaphase	25	211	0.0147852	0.0138607	0.138607	0.858214
LRR FLII-interacting protein 1 (LRRFIP1) activates type I IFN production	3	7	0.000490505	0.0151002	0.139033	0.856883
PTK6 Regulates Proteins Involved in RNA Processing	3	7	0.000490505	0.0151002	0.139033	0.856883
Post-transcriptional silencing by small RNAs	3	7	0.000490505	0.0151002	0.139033	0.856883
RHO GTPases activate PAKs	6	27	0.00189195	0.0152602	0.139033	0.856883
Adherens junctions interactions	7	35	0.00245253	0.0154481	0.139033	0.856883
Diseases of signal transduction by growth factor receptors and second messengers	50	498	0.0348959	0.0158162	0.142346	0.846656
Folding of actin by CCT/TriC	4	13	0.000910938	0.0158285	0.142457	0.846317
NoRC negatively regulates rRNA expression	12	80	0.00560577	0.0161368	0.145231	0.83794
Deactivation of the beta-catenin transactivating complex	8	44	0.00308318	0.0167618	0.150857	0.821436
Semaphorin interactions	11	71	0.00497512	0.0167743	0.150969	0.821112
Organelle biogenesis and maintenance	36	338	0.0236844	0.0171503	0.15343	0.81409
Transport of Mature mRNA derived from an Intron-Containing Transcript	12	81	0.00567585	0.0175751	0.15343	0.81409
Transcriptional regulation by small RNAs	12	81	0.00567585	0.0175751	0.15343	0.81409
DNA methylation	7	36	0.0025226	0.0177083	0.15343	0.81409
NOTCH3 Intracellular Domain Regulates Transcription	7	36	0.0025226	0.0177083	0.15343	0.81409
TGF-beta receptor signaling activates SMADs	7	36	0.0025226	0.0177083	0.15343	0.81409
Deadenylation of mRNA	6	28	0.00196202	0.0178841	0.15343	0.81409
Downregulation of TGF-beta receptor signaling	6	28	0.00196202	0.0178841	0.15343	0.81409
Programmed Cell Death	27	238	0.0166772	0.0179123	0.15343	0.81409
Signaling by NOTCH3	10	63	0.00441455	0.0189444	0.15343	0.81409
Deposition of new CENPA-containing nucleosomes at the centromere	9	54	0.0037839	0.0191788	0.15343	0.81409
Nucleosome assembly	9	54	0.0037839	0.0191788	0.15343	0.81409
Meiosis	13	92	0.00644664	0.0195104	0.156083	0.806643
Late Phase of HIV Life Cycle	20	164	0.0114918	0.0196983	0.157586	0.802482
Signaling by Rho GTPases	67	709	0.0496812	0.0197663	0.15813	0.800986
Evasion of Oncogene Induced Senescence Due to p16INK4A Defects	2	3	0.000210217	0.0206336	0.165069	0.782335
Evasion of Oxidative Stress Induced Senescence Due to p16INK4A Defects	2	3	0.000210217	0.0206336	0.165069	0.782335
Evasion of Oxidative Stress Induced Senescence Due to Defective p16INK4A binding to CDK4 and CDK6	2	3	0.000210217	0.0206336	0.165069	0.782335
Evasion of Oncogene Induced Senescence Due to Defective p16INK4A binding to CDK4 and CDK6	2	3	0.000210217	0.0206336	0.165069	0.782335
XAV939 stabilizes AXIN	2	3	0.000210217	0.0206336	0.165069	0.782335
HIV Infection	29	264	0.0184991	0.0212097	0.165721	0.780622
Condensation of Prophase Chromosomes	9	55	0.00385397	0.0212608	0.165721	0.780622
Signaling by Rho GTPases, Miro GTPases and RHOBTB3	68	725	0.0508023	0.0218366	0.165721	0.780622
Regulation of PTEN stability and activity	11	74	0.00518534	0.0218789	0.165721	0.780622
Pre-NOTCH Expression and Processing	15	114	0.00798823	0.0224491	0.165721	0.780622
Signaling by NOTCH1	12	84	0.00588606	0.0224688	0.165721	0.780622
Diseases of mitotic cell cycle	7	38	0.00266274	0.0229081	0.165721	0.780622
Mitotic Prophase	17	135	0.00945974	0.022942	0.165721	0.780622
AUF1 (hnRNP D0) binds and destabilizes mRNA	9	56	0.00392404	0.0235006	0.165721	0.780622
Signaling by Hippo	5	22	0.00154159	0.0236745	0.165721	0.780622
Signaling by ALK fusions and activated point mutants	10	66	0.00462476	0.025	0.175	0.756962
Signaling by ALK in cancer	10	66	0.00462476	0.025	0.175	0.756962
Signaling by AMER1 mutants	4	15	0.00105108	0.0250876	0.175613	0.755444
Signaling by GSK3beta mutants	4	15	0.00105108	0.0250876	0.175613	0.755444
S Phase	21	180	0.012613	0.0261058	0.182741	0.738164
ERCC6 (CSB) and EHMT2 (G9a) positively regulate rRNA expression	8	48	0.00336346	0.0263068	0.184147	0.734835
Recruitment and ATM-mediated phosphorylation of repair and signaling proteins at DNA double strand breaks	10	67	0.00469484	0.0272968	0.191078	0.71879
Chaperone Mediated Autophagy	5	23	0.00161166	0.0279074	0.195351	0.709183
Regulation of TP53 Activity through Methylation	5	23	0.00161166	0.0279074	0.195351	0.709183
RHO GTPases activate CIT	5	23	0.00161166	0.0279074	0.195351	0.709183
Constitutive Signaling by NOTCH1 HD+PEST Domain Mutants	10	68	0.00476491	0.0297403	0.19653	0.70657
Signaling by NOTCH1 PEST Domain Mutants in Cancer	10	68	0.00476491	0.0297403	0.19653	0.70657
Constitutive Signaling by NOTCH1 PEST Domain Mutants	10	68	0.00476491	0.0297403	0.19653	0.70657
Signaling by NOTCH1 HD+PEST Domain Mutants in Cancer	10	68	0.00476491	0.0297403	0.19653	0.70657
Signaling by NOTCH1 in Cancer	10	68	0.00476491	0.0297403	0.19653	0.70657
RNA Polymerase II Pre-transcription Events	12	88	0.00616635	0.0304699	0.19653	0.70657
Signaling by CTNNB1 phospho-site mutants	4	16	0.00112115	0.030718	0.19653	0.70657
S37 mutants of beta-catenin aren't phosphorylated	4	16	0.00112115	0.030718	0.19653	0.70657
S45 mutants of beta-catenin aren't phosphorylated	4	16	0.00112115	0.030718	0.19653	0.70657
T41 mutants of beta-catenin aren't phosphorylated	4	16	0.00112115	0.030718	0.19653	0.70657
S33 mutants of beta-catenin aren't phosphorylated	4	16	0.00112115	0.030718	0.19653	0.70657
PIP3 activates AKT signaling	33	319	0.022353	0.0308207	0.19653	0.70657
Separation of Sister Chromatids	22	195	0.0136641	0.0318117	0.19653	0.70657
SUMOylation of DNA replication proteins	8	50	0.00350361	0.0322721	0.19653	0.70657
Cooperation of PDCL (PhLP1) and TRiC/CCT in G-protein beta folding	7	41	0.00287296	0.0325431	0.19653	0.70657
RNA Polymerase I Transcription	12	89	0.00623642	0.0327551	0.19653	0.70657
Negative epigenetic regulation of rRNA expression	12	89	0.00623642	0.0327551	0.19653	0.70657
Stimulation of the cell death response by PAK-2p34	2	4	0.000280289	0.0349835	0.209901	0.677986
Diseases of cellular response to stress	2	4	0.000280289	0.0349835	0.209901	0.677986
Diseases of Cellular Senescence	2	4	0.000280289	0.0349835	0.209901	0.677986
Regulation of PTEN gene transcription	10	70	0.00490505	0.0350837	0.210502	0.676743
Transport of Mature Transcript to Cytoplasm	12	90	0.0063065	0.0351603	0.210962	0.675796
Disassembly of the destruction complex and recruitment of AXIN to the membrane	6	33	0.00231238	0.0356457	0.213874	0.669841
EPHA-mediated growth cone collapse	6	33	0.00231238	0.0356457	0.213874	0.669841
BBSome-mediated cargo-targeting to cilium	5	25	0.0017518	0.0377381	0.226429	0.645069
Transcription of the HIV genome	11	81	0.00567585	0.0380705	0.228423	0.64126
Transcriptional regulation by the AP-2 (TFAP2) family of transcription factors	8	52	0.00364375	0.0390994	0.234597	0.629678
Assembly of the pre-replicative complex	13	102	0.00714736	0.0394506	0.236704	0.625795
Resolution of Sister Chromatid Cohesion	16	134	0.00938967	0.0400191	0.240114	0.619582
Regulation of TP53 Activity	20	178	0.0124728	0.0405674	0.243404	0.613672
Vpr-mediated nuclear import of PICs	7	44	0.00308318	0.0445642	0.267385	0.572863
Collagen chain trimerization	7	44	0.00308318	0.0445642	0.267385	0.572863
Antiviral mechanism by IFN-stimulated genes	12	94	0.00658678	0.0460355	0.269901	0.568796
Mitotic Anaphase	26	249	0.017448	0.046229	0.269901	0.568796
Ubiquitin-dependent degradation of Cyclin D	8	54	0.0037839	0.0468293	0.269901	0.568796
The citric acid (TCA) cycle and respiratory electron transport	25	238	0.0166772	0.0471378	0.269901	0.568796
Apoptotic cleavage of cell adhesion proteins	3	11	0.000770794	0.047479	0.269901	0.568796
Intrinsic Pathway for Apoptosis	9	64	0.00448462	0.0477209	0.269901	0.568796
Mitotic Metaphase and Anaphase	26	250	0.017518	0.0480313	0.269901	0.568796
Activation of HOX genes during differentiation	14	116	0.00812837	0.0485727	0.269901	0.568796
Activation of anterior HOX genes in hindbrain development during early embryogenesis	14	116	0.00812837	0.0485727	0.269901	0.568796
Downregulation of ERBB2 signaling	6	36	0.0025226	0.0503697	0.269901	0.568796
Activation of BH3-only proteins	6	36	0.0025226	0.0503697	0.269901	0.568796
Aberrant regulation of mitotic cell cycle due to RB1 defects	6	36	0.0025226	0.0503697	0.269901	0.568796
RUNX1 regulates transcription of genes involved in differentiation of HSCs	13	106	0.00742765	0.050481	0.269901	0.568796
DNA Double Strand Break Response	10	75	0.00525541	0.0512771	0.269901	0.568796
Deadenylation-dependent mRNA decay	9	65	0.00455469	0.0516025	0.269901	0.568796
Competing endogenous RNAs (ceRNAs) regulate PTEN translation	4	19	0.00133137	0.0517401	0.269901	0.568796
Translesion synthesis by REV1	4	19	0.00133137	0.0517401	0.269901	0.568796
ERBB2 Regulates Cell Motility	4	19	0.00133137	0.0517401	0.269901	0.568796
Cellular response to hypoxia	11	86	0.00602621	0.0538193	0.269901	0.568796
Transcriptional Regulation by E2F6	7	46	0.00322332	0.0539801	0.269901	0.568796
Host Interactions of HIV factors	17	151	0.0105809	0.0547169	0.273584	0.562909
Vif-mediated degradation of APOBEC3G	8	56	0.00392404	0.0554943	0.277471	0.556782
FGFR2 alternative splicing	5	28	0.00196202	0.0560167	0.280084	0.552712
Notch-HLH transcription pathway	5	28	0.00196202	0.0560167	0.280084	0.552712
Processing of Capped Intronless Pre-mRNA	5	28	0.00196202	0.0560167	0.280084	0.552712
RNA Polymerase I Promoter Clearance	11	87	0.00609628	0.0574235	0.287118	0.54194
ALK mutants bind TKIs	3	12	0.000840866	0.0585146	0.292573	0.533766
Caspase-mediated cleavage of cytoskeletal proteins	3	12	0.000840866	0.0585146	0.292573	0.533766
IRAK2 mediated activation of TAK1 complex	3	12	0.000840866	0.0585146	0.292573	0.533766
Interactions of Vpr with host cellular proteins	7	47	0.00329339	0.0591202	0.295601	0.529294
Cell-cell junction organization	9	67	0.00469484	0.0599719	0.29986	0.523082
Translesion synthesis by POLI	4	20	0.00140144	0.0601241	0.300621	0.521981
Degradation of AXIN	8	57	0.00399411	0.0601851	0.300925	0.521541
Gene Silencing by RNA	14	120	0.00840866	0.0605509	0.302755	0.518909
Cyclin E associated events during G1/S transition	11	88	0.00616635	0.061184	0.30592	0.514392
SMAD2/SMAD3:SMAD4 heterotrimer regulates transcription	6	38	0.00266274	0.0619819	0.309909	0.508765
ESR-mediated signaling	26	257	0.0180085	0.0621032	0.310516	0.507916
RNA Polymerase II Transcription	140	1694	0.118702	0.0623973	0.311986	0.505865
Prefoldin mediated transfer of substrate to CCT/TriC	5	29	0.00203209	0.063065	0.314338	0.502603
Inhibition of DNA recombination at telomere	7	48	0.00336346	0.0645515	0.314338	0.502603
mRNA 3'-end processing	8	58	0.00406419	0.0651177	0.314338	0.502603
SUMOylation of SUMOylation proteins	6	39	0.00273281	0.0683334	0.314338	0.502603
Tat-mediated HIV elongation arrest and recovery	6	39	0.00273281	0.0683334	0.314338	0.502603
Pausing and recovery of Tat-mediated HIV elongation	6	39	0.00273281	0.0683334	0.314338	0.502603
Regulation of TP53 Activity through Acetylation	6	39	0.00273281	0.0683334	0.314338	0.502603
Regulation of MECP2 expression and activity	6	39	0.00273281	0.0683334	0.314338	0.502603
Cyclin A:Cdk2-associated events at S phase entry	11	90	0.0063065	0.0691805	0.314338	0.502603
Translesion synthesis by POLK	4	21	0.00147152	0.0691827	0.314338	0.502603
TP53 Regulates Transcription of Genes Involved in G2 Cell Cycle Arrest	4	21	0.00147152	0.0691827	0.314338	0.502603
Deletions in the AMER1 gene destabilize the destruction complex	1	1	7.00722e-05	0.0702202	0.314338	0.502603
TNFR1-induced NFkappaB signaling pathway	5	30	0.00210217	0.0705892	0.314338	0.502603
Formation of tubulin folding intermediates by CCT/TriC	5	30	0.00210217	0.0705892	0.314338	0.502603
TICAM1,TRAF6-dependent induction of TAK1 complex	3	13	0.000910938	0.0706389	0.314338	0.502603
Josephin domain DUBs	3	13	0.000910938	0.0706389	0.314338	0.502603
Apoptosis induced DNA fragmentation	3	13	0.000910938	0.0706389	0.314338	0.502603
Activation of NOXA and translocation to mitochondria	2	6	0.000420433	0.0716576	0.314338	0.502603
Cellular response to heat stress	15	135	0.00945974	0.0738799	0.314338	0.502603
HIV elongation arrest and recovery	6	40	0.00280289	0.0750482	0.314338	0.502603
Pausing and recovery of HIV elongation	6	40	0.00280289	0.0750482	0.314338	0.502603
DNA Damage Recognition in GG-NER	6	40	0.00280289	0.0750482	0.314338	0.502603
ROS sensing by NFE2L2	8	60	0.00420433	0.0757138	0.314338	0.502603
Regulation of activated PAK-2p34 by proteasome mediated degradation	7	50	0.00350361	0.0762916	0.314338	0.502603
Regulation of PLK1 Activity at G2/M Transition	11	92	0.00644664	0.0778189	0.314338	0.502603
Laminin interactions	5	31	0.00217224	0.0785845	0.314338	0.502603
Signaling by PTK6	9	71	0.00497512	0.0791898	0.316759	0.49927
Signaling by Non-Receptor Tyrosine Kinases	9	71	0.00497512	0.0791898	0.316759	0.49927
TP53 Regulates Metabolic Genes	14	126	0.00882909	0.0820049	0.32802	0.4841
Nuclear import of Rev protein	6	41	0.00287296	0.0821243	0.328497	0.483468
Regulation of TNFR1 signaling	6	41	0.00287296	0.0821243	0.328497	0.483468
SUMOylation of RNA binding proteins	7	51	0.00357368	0.0826003	0.330401	0.480958
TNF signaling	7	51	0.00357368	0.0826003	0.330401	0.480958
InlA-mediated entry of Listeria monocytogenes into host cells	3	14	0.00098101	0.0837896	0.335158	0.47475
Truncations of AMER1 destabilize the destruction complex	3	14	0.00098101	0.0837896	0.335158	0.47475
APC truncation mutants have impaired AXIN binding	3	14	0.00098101	0.0837896	0.335158	0.47475
AXIN missense mutants destabilize the destruction complex	3	14	0.00098101	0.0837896	0.335158	0.47475
Signaling by APC mutants	3	14	0.00098101	0.0837896	0.335158	0.47475
Alpha-protein kinase 1 signaling pathway	3	14	0.00098101	0.0837896	0.335158	0.47475
Oxygen-dependent proline hydroxylation of Hypoxia-inducible Factor Alpha	9	72	0.0050452	0.084517	0.338068	0.470996
ISG15 antiviral mechanism	10	83	0.00581599	0.0862964	0.345185	0.461948
Metalloprotease DUBs	5	32	0.00224231	0.0870438	0.348175	0.458202
Regulation of RUNX1 Expression and Activity	5	32	0.00224231	0.0870438	0.348175	0.458202
SUMOylation of chromatin organization proteins	8	62	0.00434447	0.0872872	0.349149	0.456989
SCF(Skp2)-mediated degradation of p27/p21	8	62	0.00434447	0.0872872	0.349149	0.456989
RNA Polymerase III Transcription Termination	4	23	0.00161166	0.0892577	0.357031	0.447295
DEx/H-box helicases activate type I IFN and inflammatory cytokines production	2	7	0.000490505	0.093103	0.372412	0.428976
SMAC (DIABLO) binds to IAPs	2	7	0.000490505	0.093103	0.372412	0.428976
SMAC(DIABLO)-mediated dissociation of IAP:caspase complexes	2	7	0.000490505	0.093103	0.372412	0.428976
FLT3 signaling by CBL mutants	2	7	0.000490505	0.093103	0.372412	0.428976
Formation of RNA Pol II elongation complex	8	63	0.00441455	0.0934392	0.373757	0.427411
SUMOylation of ubiquitinylation proteins	6	43	0.0030131	0.097346	0.389384	0.409622
Regulation of TP53 Degradation	6	43	0.0030131	0.097346	0.389384	0.409622
Condensation of Prometaphase Chromosomes	3	15	0.00105108	0.0978973	0.391589	0.407169
Signaling by AXIN mutants	3	15	0.00105108	0.0978973	0.391589	0.407169
Chk1/Chk2(Cds1) mediated inactivation of Cyclin B:Cdk1 complex	3	15	0.00105108	0.0978973	0.391589	0.407169
RNA Polymerase I Promoter Escape	8	64	0.00448462	0.099833	0.399332	0.398666
Translesion Synthesis by POLH	4	24	0.00168173	0.100231	0.400925	0.396937
Nucleotide Excision Repair	13	119	0.00833859	0.100246	0.400985	0.396872
RHOA GTPase cycle	16	154	0.0107911	0.103168	0.40191	0.395871
Autodegradation of the E3 ubiquitin ligase COP1	7	54	0.0037839	0.103262	0.40191	0.395871
Regulation of Apoptosis	7	54	0.0037839	0.103262	0.40191	0.395871
DNA Replication Pre-Initiation	13	120	0.00840866	0.104995	0.40191	0.395871
Pyroptosis	5	34	0.00238245	0.105316	0.40191	0.395871
Nuclear Envelope Breakdown	8	65	0.00455469	0.106466	0.40191	0.395871
TP53 Regulates Transcription of Cell Cycle Genes	8	65	0.00455469	0.106466	0.40191	0.395871
FBXL7 down-regulates AURKA during mitotic entry and in early mitosis	7	55	0.00385397	0.110717	0.40191	0.395871
SUMOylation of DNA methylation proteins	3	16	0.00112115	0.112888	0.40191	0.395871
Regulation of FOXO transcriptional activity by acetylation	3	16	0.00112115	0.112888	0.40191	0.395871
RNA Polymerase II Transcription Elongation	8	66	0.00462476	0.113337	0.40191	0.395871
Gap-filling DNA repair synthesis and ligation in TC-NER	8	66	0.00462476	0.113337	0.40191	0.395871
Asymmetric localization of PCP proteins	8	66	0.00462476	0.113337	0.40191	0.395871
SIRT1 negatively regulates rRNA expression	6	45	0.00315325	0.113957	0.40191	0.395871
SMAC, XIAP-regulated apoptotic response	2	8	0.000560577	0.116116	0.40191	0.395871
Activation of caspases through apoptosome-mediated cleavage	2	8	0.000560577	0.116116	0.40191	0.395871
RUNX3 regulates CDKN1A transcription	2	8	0.000560577	0.116116	0.40191	0.395871
Aryl hydrocarbon receptor signalling	2	8	0.000560577	0.116116	0.40191	0.395871
RUNX1 regulates expression of components of tight junctions	2	8	0.000560577	0.116116	0.40191	0.395871
Maturation of protein E	2	8	0.000560577	0.116116	0.40191	0.395871
Maturation of protein E	2	8	0.000560577	0.116116	0.40191	0.395871
Formation of TC-NER Pre-Incision Complex	7	56	0.00392404	0.11845	0.40191	0.395871
Reproduction	13	123	0.00861888	0.120032	0.40191	0.395871
RHOF GTPase cycle	6	46	0.00322332	0.122766	0.40191	0.395871
Regulation of TP53 Expression and Degradation	6	46	0.00322332	0.122766	0.40191	0.395871
Defective TPR may confer susceptibility towards thyroid papillary carcinoma (TPC)	5	36	0.0025226	0.125311	0.40191	0.395871
Degradation of DVL	7	57	0.00399411	0.126454	0.40191	0.395871
Negative regulation of NOTCH4 signaling	7	57	0.00399411	0.126454	0.40191	0.395871
Regulation of RUNX3 expression and activity	7	57	0.00399411	0.126454	0.40191	0.395871
Intracellular signaling by second messengers	33	366	0.0256464	0.12689	0.40191	0.395871
Intra-Golgi and retrograde Golgi-to-ER traffic	21	219	0.0153458	0.127008	0.40191	0.395871
ECM proteoglycans	9	79	0.0055357	0.127612	0.40191	0.395871
Cell Cycle Checkpoints	26	280	0.0196202	0.127959	0.40191	0.395871
Formation of Senescence-Associated Heterochromatin Foci (SAHF)	3	17	0.00119123	0.128685	0.40191	0.395871
Membrane binding and targetting of GAG proteins	3	17	0.00119123	0.128685	0.40191	0.395871
Golgi-to-ER retrograde transport	15	148	0.0103707	0.128956	0.40191	0.395871
Aggrephagy	6	47	0.00329339	0.131898	0.40191	0.395871
Interactions of Rev with host cellular proteins	6	47	0.00329339	0.131898	0.40191	0.395871
RHO GTPases Activate Formins	15	149	0.0104408	0.13397	0.40191	0.395871
Diseases of Telomere Maintenance	1	2	0.000140144	0.135514	0.402475	0.395261
Alternative Lengthening of Telomeres (ALT)	1	2	0.000140144	0.135514	0.402475	0.395261
Defective Inhibition of DNA Recombination at Telomere	1	2	0.000140144	0.135514	0.402475	0.395261
Regulation of PAK-2p34 activity by PS-GAP/RHG10	1	2	0.000140144	0.135514	0.402475	0.395261
Defective Inhibition of DNA Recombination at Telomere Due to DAXX Mutations	1	2	0.000140144	0.135514	0.402475	0.395261
Evasion of Oncogene Induced Senescence Due to Defective p16INK4A binding to CDK4	1	2	0.000140144	0.135514	0.402475	0.395261
Evasion of Oxidative Stress Induced Senescence Due to Defective p16INK4A binding to CDK4	1	2	0.000140144	0.135514	0.402475	0.395261
Defective Inhibition of DNA Recombination at Telomere Due to ATRX Mutations	1	2	0.000140144	0.135514	0.402475	0.395261
Cooperation of Prefoldin and TriC/CCT in actin and tubulin folding	5	37	0.00259267	0.135917	0.402475	0.395261
Gap-filling DNA repair synthesis and ligation in GG-NER	4	27	0.00189195	0.136573	0.402475	0.395261
Inactivation of CSF3 (G-CSF) signaling	4	27	0.00189195	0.136573	0.402475	0.395261
Chromosome Maintenance	14	138	0.00966996	0.137931	0.402475	0.395261
Autointegration results in viral DNA circles	2	9	0.00063065	0.14037	0.402475	0.395261
Integration of viral DNA into host genomic DNA	2	9	0.00063065	0.14037	0.402475	0.395261
Recruitment of mitotic centrosome proteins and complexes	9	81	0.00567585	0.141735	0.402475	0.395261
NCAM signaling for neurite out-growth	8	70	0.00490505	0.143119	0.402475	0.395261
Stabilization of p53	7	59	0.00413426	0.143253	0.402475	0.395261
ERBB2 Activates PTK6 Signaling	3	18	0.0012613	0.145209	0.402475	0.395261
IRAK2 mediated activation of TAK1 complex upon TLR7/8 or 9 stimulation	3	18	0.0012613	0.145209	0.402475	0.395261
Synthesis And Processing Of GAG, GAGPOL Polyproteins	3	18	0.0012613	0.145209	0.402475	0.395261
RHOH GTPase cycle	5	38	0.00266274	0.146906	0.402475	0.395261
G2/M Transition	20	212	0.0148553	0.148743	0.402475	0.395261
TP53 regulates transcription of additional cell cycle genes whose exact role in the p53 pathway remain uncertain	4	28	0.00196202	0.149723	0.402475	0.395261
Formation of HIV-1 elongation complex containing HIV-1 Tat	6	49	0.00343354	0.151093	0.402475	0.395261
Activated PKN1 stimulates transcription of AR (androgen receptor) regulated genes KLK2 and KLK3	6	49	0.00343354	0.151093	0.402475	0.395261
Regulation of RAS by GAPs	8	71	0.00497512	0.151117	0.402475	0.395261
Loss of proteins required for interphase microtubule organization from the centrosome	8	71	0.00497512	0.151117	0.402475	0.395261
Loss of Nlp from mitotic centrosomes	8	71	0.00497512	0.151117	0.402475	0.395261
Amplification of signal from unattached kinetochores via a MAD2 inhibitory signal	10	94	0.00658678	0.153321	0.402475	0.395261
Amplification of signal from the kinetochores	10	94	0.00658678	0.153321	0.402475	0.395261
Cell junction organization	10	94	0.00658678	0.153321	0.402475	0.395261
Centrosome maturation	9	83	0.00581599	0.156616	0.402475	0.395261
Mitotic G2-G2/M phases	20	214	0.0149954	0.157937	0.402475	0.395261
Transport of the SLBP independent Mature mRNA	5	39	0.00273281	0.158259	0.402475	0.395261
Respiratory electron transport	12	118	0.00826852	0.158325	0.402475	0.395261
G2/M Checkpoints	15	154	0.0107911	0.160653	0.402475	0.395261
Formation of HIV elongation complex in the absence of HIV Tat	6	50	0.00350361	0.161132	0.402475	0.395261
TRAF6-mediated induction of TAK1 complex within TLR4 complex	3	19	0.00133137	0.162381	0.402475	0.395261
Activation of BAD and translocation to mitochondria	3	19	0.00133137	0.162381	0.402475	0.395261
COPI-mediated anterograde transport	11	107	0.00749772	0.163061	0.402475	0.395261
Regulation of PTEN mRNA translation	4	29	0.00203209	0.163335	0.402475	0.395261
RUNX3 regulates WNT signaling	2	10	0.000700722	0.165578	0.402475	0.395261
Binding of TCF/LEF:CTNNB1 to target gene promoters	2	10	0.000700722	0.165578	0.402475	0.395261
Activation of PUMA and translocation to mitochondria	2	10	0.000700722	0.165578	0.402475	0.395261
MECP2 regulates transcription factors	2	10	0.000700722	0.165578	0.402475	0.395261
Orc1 removal from chromatin	8	73	0.00511527	0.167739	0.402475	0.395261
Transport of the SLBP Dependant Mature mRNA	5	40	0.00280289	0.169957	0.402475	0.395261
Association of TriC/CCT with target proteins during biosynthesis	5	40	0.00280289	0.169957	0.402475	0.395261
Regulation of Glucokinase by Glucokinase Regulatory Protein	5	40	0.00280289	0.169957	0.402475	0.395261
Assembly of the ORC complex at the origin of replication	5	40	0.00280289	0.169957	0.402475	0.395261
GLI3 is processed to GLI3R by the proteasome	7	62	0.00434447	0.170319	0.402475	0.395261
Degradation of GLI2 by the proteasome	7	62	0.00434447	0.170319	0.402475	0.395261
Transcription-Coupled Nucleotide Excision Repair (TC-NER)	9	85	0.00595613	0.172223	0.402475	0.395261
SARS-CoV Infections	20	217	0.0152057	0.172296	0.402475	0.395261
AURKA Activation by TPX2	8	74	0.00518534	0.176351	0.402475	0.395261
Post-translational protein phosphorylation	11	109	0.00763787	0.177014	0.402475	0.395261
Recognition of DNA damage by PCNA-containing replication complex	4	30	0.00210217	0.177372	0.402475	0.395261
Signaling by ERBB2 TMD/JMD mutants	4	30	0.00210217	0.177372	0.402475	0.395261
Neurodegenerative Diseases	4	30	0.00210217	0.177372	0.402475	0.395261
Deregulated CDK5 triggers multiple neurodegenerative pathways in Alzheimer's disease models	4	30	0.00210217	0.177372	0.402475	0.395261
EML4 and NUDC in mitotic spindle formation	12	121	0.00847873	0.178034	0.402475	0.395261
Cell-Cell communication	13	133	0.0093196	0.178434	0.402475	0.395261
Transcription of E2F targets under negative control by p107 (RBL1) and p130 (RBL2) in complex with HDAC1	3	20	0.00140144	0.180122	0.402475	0.395261
tRNA processing	17	182	0.0127531	0.181684	0.402475	0.395261
HIV Transcription Elongation	6	52	0.00364375	0.182033	0.402475	0.395261
Tat-mediated elongation of the HIV-1 transcript	6	52	0.00364375	0.182033	0.402475	0.395261
UCH proteinases	10	98	0.00686707	0.182764	0.402475	0.395261
Cytoprotection by HMOX1	15	158	0.0110714	0.183856	0.402475	0.395261
Regulation of HMOX1 expression and activity	8	75	0.00525541	0.185153	0.402475	0.395261
Hh mutants abrogate ligand secretion	7	64	0.00448462	0.189508	0.402475	0.395261
Myoclonic epilepsy of Lafora	2	11	0.000770794	0.191488	0.402475	0.395261
Modulation by Mtb of host immune system	2	11	0.000770794	0.191488	0.402475	0.395261
PTK6 Regulates RTKs and Their Effectors AKT1 and DOK1	2	11	0.000770794	0.191488	0.402475	0.395261
Long-term potentiation	4	31	0.00217224	0.191798	0.402475	0.395261
HDMs demethylate histones	4	31	0.00217224	0.191798	0.402475	0.395261
Mitophagy	4	31	0.00217224	0.191798	0.402475	0.395261
Vpu mediated degradation of CD4	6	53	0.00371383	0.192868	0.402475	0.395261
Collagen biosynthesis and modifying enzymes	8	76	0.00532549	0.19414	0.402475	0.395261
Nuclear Pore Complex (NPC) Disassembly	5	42	0.00294303	0.194304	0.402475	0.395261
Signaling by TCF7L2 mutants	1	3	0.000210217	0.196227	0.402475	0.395261
SMAD2/3 MH2 Domain Mutants in Cancer	1	3	0.000210217	0.196227	0.402475	0.395261
Loss of Function of SMAD4 in Cancer	1	3	0.000210217	0.196227	0.402475	0.395261
Defective SLC6A2 causes orthostatic intolerance (OI)	1	3	0.000210217	0.196227	0.402475	0.395261
SMAD4 MH2 Domain Mutants in Cancer	1	3	0.000210217	0.196227	0.402475	0.395261
Defective POMGNT1 causes MDDGA3, MDDGB3 and MDDGC3	1	3	0.000210217	0.196227	0.402475	0.395261
Manipulation of host energy metabolism	1	3	0.000210217	0.196227	0.402475	0.395261
Breakdown of the nuclear lamina	1	3	0.000210217	0.196227	0.402475	0.395261
SHC1 events in ERBB4 signaling	3	21	0.00147152	0.198355	0.402475	0.395261
mRNA decay by 5' to 3' exoribonuclease	3	21	0.00147152	0.198355	0.402475	0.395261
GRB2 events in ERBB2 signaling	3	21	0.00147152	0.198355	0.402475	0.395261
Mitotic G1 phase and G1/S transition	16	173	0.0121225	0.200546	0.402475	0.395261
Regulated Necrosis	8	77	0.00539556	0.203304	0.402475	0.395261
Generic Transcription Pathway	122	1555	0.108962	0.203427	0.402475	0.395261
Ubiquitin Mediated Degradation of Phosphorylated Cdc25A	6	54	0.0037839	0.203941	0.402475	0.395261
p53-Independent G1/S DNA damage checkpoint	6	54	0.0037839	0.203941	0.402475	0.395261
p53-Independent DNA Damage Response	6	54	0.0037839	0.203941	0.402475	0.395261
Myogenesis	4	32	0.00224231	0.206576	0.402475	0.395261
RND3 GTPase cycle	5	43	0.0030131	0.206911	0.402475	0.395261
EPH-Ephrin signaling	10	102	0.00714736	0.214562	0.402475	0.395261
SCF-beta-TrCP mediated degradation of Emi1	6	55	0.00385397	0.215237	0.402475	0.395261
PINK1-PRKN Mediated Mitophagy	3	22	0.00154159	0.217004	0.402475	0.395261
RHO GTPases activate KTN1	2	12	0.000840866	0.217876	0.402475	0.395261
Unwinding of DNA	2	12	0.000840866	0.217876	0.402475	0.395261
Activation of the TFAP2 (AP-2) family of transcription factors	2	12	0.000840866	0.217876	0.402475	0.395261
Butyrophilin (BTN) family interactions	2	12	0.000840866	0.217876	0.402475	0.395261
Regulation of beta-cell development	7	67	0.00469484	0.219818	0.402475	0.395261
Regulation of Insulin-like Growth Factor (IGF) transport and uptake by Insulin-like Growth Factor Binding Proteins (IGFBPs)	12	127	0.00889917	0.220711	0.402475	0.395261
Interaction between L1 and Ankyrins	4	33	0.00231238	0.221668	0.402475	0.395261
Synthesis of active ubiquitin: roles of E1 and E2 enzymes	4	33	0.00231238	0.221668	0.402475	0.395261
Defective Intrinsic Pathway for Apoptosis	4	33	0.00231238	0.221668	0.402475	0.395261
Senescence-Associated Secretory Phenotype (SASP)	9	91	0.00637657	0.222981	0.402475	0.395261
NGF-stimulated transcription	6	56	0.00392404	0.22674	0.402475	0.395261
HCMV Early Events	19	215	0.0150655	0.228094	0.402475	0.395261
Dual incision in TC-NER	7	68	0.00476491	0.230286	0.402475	0.395261
Signaling by ERBB2	7	68	0.00476491	0.230286	0.402475	0.395261
Kinesins	7	68	0.00476491	0.230286	0.402475	0.395261
Global Genome Nucleotide Excision Repair (GG-NER)	9	92	0.00644664	0.231953	0.402475	0.395261
Rev-mediated nuclear export of HIV RNA	5	45	0.00315325	0.23288	0.402475	0.395261
Beta-catenin independent WNT signaling	15	166	0.011632	0.234747	0.402475	0.395261
Ephrin signaling	3	23	0.00161166	0.235996	0.402475	0.395261
Apoptotic factor-mediated response	3	23	0.00161166	0.235996	0.402475	0.395261
NOTCH2 Activation and Transmission of Signal to the Nucleus	3	23	0.00161166	0.235996	0.402475	0.395261
RHO GTPase cycle	38	460	0.0322332	0.23629	0.402475	0.395261
Packaging Of Telomere Ends	4	34	0.00238245	0.237039	0.402475	0.395261
DNA Damage Bypass	6	57	0.00399411	0.238437	0.402475	0.395261
RHOD GTPase cycle	6	57	0.00399411	0.238437	0.402475	0.395261
Cargo trafficking to the periciliary membrane	6	57	0.00399411	0.238437	0.402475	0.395261
Translocation of SLC2A4 (GLUT4) to the plasma membrane	8	81	0.00567585	0.241568	0.402475	0.395261
Ca2+ pathway	8	81	0.00567585	0.241568	0.402475	0.395261
2-LTR circle formation	2	13	0.000910938	0.244547	0.402475	0.395261
Pexophagy	2	13	0.000910938	0.244547	0.402475	0.395261
Transport of Mature mRNA Derived from an Intronless Transcript	5	46	0.00322332	0.246197	0.402475	0.395261
NS1 Mediated Effects on Host Pathways	5	46	0.00322332	0.246197	0.402475	0.395261
MAPK6/MAPK4 signaling	10	106	0.00742765	0.248409	0.402475	0.395261
Meiotic recombination	6	58	0.00406419	0.25031	0.402475	0.395261
Heme signaling	7	70	0.00490505	0.251705	0.402475	0.395261
p53-Dependent G1 DNA Damage Response	7	70	0.00490505	0.251705	0.402475	0.395261
p53-Dependent G1/S DNA damage checkpoint	7	70	0.00490505	0.251705	0.402475	0.395261
tRNA processing in the nucleus	7	70	0.00490505	0.251705	0.402475	0.395261
Late endosomal microautophagy	4	35	0.00245253	0.25265	0.402475	0.395261
Signaling by ERBB2 KD Mutants	4	35	0.00245253	0.25265	0.402475	0.395261
Signaling by CSF3 (G-CSF)	4	35	0.00245253	0.25265	0.402475	0.395261
Drug resistance in ERBB2 KD mutants	1	4	0.000280289	0.252679	0.402475	0.395261
Drug-mediated inhibition of ERBB2 signaling	1	4	0.000280289	0.252679	0.402475	0.395261
Resistance of ERBB2 KD mutants to sapitinib	1	4	0.000280289	0.252679	0.402475	0.395261
Defective SLC6A5 causes hyperekplexia 3 (HKPX3)	1	4	0.000280289	0.252679	0.402475	0.395261
Resistance of ERBB2 KD mutants to neratinib	1	4	0.000280289	0.252679	0.402475	0.395261
Resistance of ERBB2 KD mutants to afatinib	1	4	0.000280289	0.252679	0.402475	0.395261
Resistance of ERBB2 KD mutants to osimertinib	1	4	0.000280289	0.252679	0.402475	0.395261
Defective POMT2 causes MDDGA2, MDDGB2 and MDDGC2	1	4	0.000280289	0.252679	0.402475	0.395261
Resistance of ERBB2 KD mutants to AEE788	1	4	0.000280289	0.252679	0.402475	0.395261
Resistance of ERBB2 KD mutants to trastuzumab	1	4	0.000280289	0.252679	0.402475	0.395261
Resistance of ERBB2 KD mutants to lapatinib	1	4	0.000280289	0.252679	0.402475	0.395261
Drug resistance in ERBB2 TMD/JMD mutants	1	4	0.000280289	0.252679	0.402475	0.395261
HHAT G278V doesn't palmitoylate Hh-Np	1	4	0.000280289	0.252679	0.402475	0.395261
Defective POMT1 causes MDDGA1, MDDGB1 and MDDGC1	1	4	0.000280289	0.252679	0.402475	0.395261
Resistance of ERBB2 KD mutants to tesevatinib	1	4	0.000280289	0.252679	0.402475	0.395261
Localization of the PINCH-ILK-PARVIN complex to focal adhesions	1	4	0.000280289	0.252679	0.402475	0.395261
Prostacyclin signalling through prostacyclin receptor	3	24	0.00168173	0.255261	0.402475	0.395261
Maturation of nucleoprotein	3	24	0.00168173	0.255261	0.402475	0.395261
COPI-dependent Golgi-to-ER retrograde traffic	10	107	0.00749772	0.257151	0.402475	0.395261
Transport of Mature mRNAs Derived from Intronless Transcripts	5	47	0.00329339	0.259705	0.402475	0.395261
RNA Polymerase II Transcription Pre-Initiation And Promoter Opening	5	47	0.00329339	0.259705	0.402475	0.395261
The role of GTSE1 in G2/M progression after G2 checkpoint	8	83	0.00581599	0.261547	0.402475	0.395261
Regulation of RUNX2 expression and activity	8	83	0.00581599	0.261547	0.402475	0.395261
CDT1 association with the CDC6:ORC:origin complex	6	59	0.00413426	0.262346	0.402475	0.395261
Complex I biogenesis	6	59	0.00413426	0.262346	0.402475	0.395261
rRNA modification in the nucleus and cytosol	7	71	0.00497512	0.262632	0.402475	0.395261
DNA Damage/Telomere Stress Induced Senescence	7	71	0.00497512	0.262632	0.402475	0.395261
Signaling by ERBB2 in Cancer	4	36	0.0025226	0.268465	0.402475	0.395261
Chaperonin-mediated protein folding	9	96	0.00672693	0.269067	0.402475	0.395261
RHOBTB3 ATPase cycle	2	14	0.00098101	0.271333	0.402475	0.395261
Regulation of localization of FOXO transcription factors	2	14	0.00098101	0.271333	0.402475	0.395261
TICAM1-dependent activation of IRF3/IRF7	2	14	0.00098101	0.271333	0.402475	0.395261
Translesion synthesis by Y family DNA polymerases bypasses lesions on DNA template	5	48	0.00336346	0.273382	0.402475	0.395261
Transcriptional Regulation by VENTX	5	48	0.00336346	0.273382	0.402475	0.395261
Transport of Ribonucleoproteins into the Host Nucleus	5	48	0.00336346	0.273382	0.402475	0.395261
HSP90 chaperone cycle for steroid hormone receptors (SHR) in the presence of ligand	7	72	0.0050452	0.27369	0.402475	0.395261
G1/S DNA Damage Checkpoints	7	72	0.0050452	0.27369	0.402475	0.395261
Hedgehog ligand biogenesis	7	72	0.0050452	0.27369	0.402475	0.395261
Transcription of E2F targets under negative control by DREAM complex	3	25	0.0017518	0.274731	0.402475	0.395261
Negative regulation of MET activity	3	25	0.0017518	0.274731	0.402475	0.395261
Signal transduction by L1	3	25	0.0017518	0.274731	0.402475	0.395261
Nephrin family interactions	3	25	0.0017518	0.274731	0.402475	0.395261
Cilium Assembly	18	210	0.0147152	0.274967	0.402475	0.395261
Recruitment of NuMA to mitotic centrosomes	9	97	0.006797	0.278616	0.402475	0.395261
NR1H2 and NR1H3-mediated signaling	8	85	0.00595613	0.281999	0.402475	0.395261
HATs acetylate histones	10	110	0.00770794	0.283959	0.402475	0.395261
Budding and maturation of HIV virion	4	37	0.00259267	0.28445	0.402475	0.395261
EGFR downregulation	4	37	0.00259267	0.28445	0.402475	0.395261
Hh mutants are degraded by ERAD	6	61	0.0042744	0.286839	0.402475	0.395261
Non-integrin membrane-ECM interactions	6	61	0.0042744	0.286839	0.402475	0.395261
NIK-->noncanonical NF-kB signaling	6	61	0.0042744	0.286839	0.402475	0.395261
DNA Replication	15	174	0.0121926	0.29065	0.402475	0.395261
Signaling by Receptor Tyrosine Kinases	49	618	0.0433046	0.290824	0.402475	0.395261
Mitotic Spindle Checkpoint	10	111	0.00777801	0.293069	0.402475	0.395261
JNK (c-Jun kinases) phosphorylation and activation mediated by activated human TAK1	3	26	0.00182188	0.294345	0.402475	0.395261
Early Phase of HIV Life Cycle	3	26	0.00182188	0.294345	0.402475	0.395261
Anchoring of the basal body to the plasma membrane	9	99	0.00693715	0.297991	0.402475	0.395261
PCP/CE pathway	9	99	0.00693715	0.297991	0.402475	0.395261
PI3K events in ERBB4 signaling	2	15	0.00105108	0.298086	0.402475	0.395261
POLB-Dependent Long Patch Base Excision Repair	2	15	0.00105108	0.298086	0.402475	0.395261
Integration of provirus	2	15	0.00105108	0.298086	0.402475	0.395261
Regulation of gene expression by Hypoxia-inducible Factor	2	15	0.00105108	0.298086	0.402475	0.395261
Inhibition of replication initiation of damaged DNA by RB1/E2F1	2	15	0.00105108	0.298086	0.402475	0.395261
Reduction of cytosolic Ca++ levels	2	15	0.00105108	0.298086	0.402475	0.395261
APOBEC3G mediated resistance to HIV-1 infection	2	15	0.00105108	0.298086	0.402475	0.395261
OAS antiviral response	2	15	0.00105108	0.298086	0.402475	0.395261
Cytochrome c-mediated apoptotic response	2	15	0.00105108	0.298086	0.402475	0.395261
Anchoring fibril formation	2	15	0.00105108	0.298086	0.402475	0.395261
NF-kB is activated and signals survival	2	15	0.00105108	0.298086	0.402475	0.395261
ATF6 (ATF6-alpha) activates chaperone genes	2	15	0.00105108	0.298086	0.402475	0.395261
Degradation of GLI1 by the proteasome	6	62	0.00434447	0.299266	0.402475	0.395261
Molecules associated with elastic fibres	4	38	0.00266274	0.300569	0.402475	0.395261
DNA strand elongation	4	38	0.00266274	0.300569	0.402475	0.395261
G1/S Transition	13	150	0.0105108	0.302041	0.402475	0.395261
NR1D1 (REV-ERBA) represses gene expression	1	5	0.000350361	0.30517	0.402475	0.395261
Regulation of gap junction activity	1	5	0.000350361	0.30517	0.402475	0.395261
Negative regulation of TCF-dependent signaling by DVL-interacting proteins	1	5	0.000350361	0.30517	0.402475	0.395261
Activation of BIM and translocation to mitochondria	1	5	0.000350361	0.30517	0.402475	0.395261
MET interacts with TNS proteins	1	5	0.000350361	0.30517	0.402475	0.395261
ER to Golgi Anterograde Transport	14	164	0.0114918	0.311502	0.402475	0.395261
Regulation of HSF1-mediated heat shock response	10	113	0.00791816	0.311513	0.402475	0.395261
COPI-independent Golgi-to-ER retrograde traffic	6	63	0.00441455	0.311792	0.402475	0.395261
Transcriptional activation of mitochondrial biogenesis	8	88	0.00616635	0.313404	0.402475	0.395261
Nuclear events stimulated by ALK signaling in cancer	3	27	0.00189195	0.314041	0.402475	0.395261
Listeria monocytogenes entry into host cells	3	27	0.00189195	0.314041	0.402475	0.395261
Initiation of Nuclear Envelope (NE) Reformation	3	27	0.00189195	0.314041	0.402475	0.395261
Assembly Of The HIV Virion	3	27	0.00189195	0.314041	0.402475	0.395261
activated TAK1 mediates p38 MAPK activation	3	27	0.00189195	0.314041	0.402475	0.395261
RHOV GTPase cycle	4	39	0.00273281	0.31679	0.402475	0.395261
TAK1 activates NFkB by phosphorylation and activation of IKKs complex	4	39	0.00273281	0.31679	0.402475	0.395261
Recognition and association of DNA glycosylase with site containing an affected purine	4	39	0.00273281	0.31679	0.402475	0.395261
Selective autophagy	8	89	0.00623642	0.324029	0.402475	0.395261
Autodegradation of Cdh1 by Cdh1:APC/C	6	64	0.00448462	0.324401	0.402475	0.395261
Repression of WNT target genes	2	16	0.00112115	0.324677	0.402475	0.395261
Defective EXT1 causes exostoses 1, TRPS2 and CHDS	2	16	0.00112115	0.324677	0.402475	0.395261
Defective EXT2 causes exostoses 2	2	16	0.00112115	0.324677	0.402475	0.395261
Beta oxidation of myristoyl-CoA to lauroyl-CoA	2	16	0.00112115	0.324677	0.402475	0.395261
Downregulation of ERBB2:ERBB3 signaling	2	16	0.00112115	0.324677	0.402475	0.395261
Signaling by NOTCH1 HD Domain Mutants in Cancer	2	16	0.00112115	0.324677	0.402475	0.395261
Constitutive Signaling by NOTCH1 HD Domain Mutants	2	16	0.00112115	0.324677	0.402475	0.395261
IRAK1 recruits IKK complex	2	16	0.00112115	0.324677	0.402475	0.395261
IRAK1 recruits IKK complex upon TLR7/8 or 9 stimulation	2	16	0.00112115	0.324677	0.402475	0.395261
p75NTR recruits signalling complexes	2	16	0.00112115	0.324677	0.402475	0.395261
Protein folding	9	102	0.00714736	0.327629	0.402475	0.395261
RNA Polymerase II HIV Promoter Escape	5	52	0.00364375	0.329333	0.402475	0.395261
HIV Transcription Initiation	5	52	0.00364375	0.329333	0.402475	0.395261
RNA Polymerase II Transcription Initiation	5	52	0.00364375	0.329333	0.402475	0.395261
mTORC1-mediated signalling	3	28	0.00196202	0.333764	0.402475	0.395261
NOTCH3 Activation and Transmission of Signal to the Nucleus	3	28	0.00196202	0.333764	0.402475	0.395261
RHOG GTPase cycle	7	78	0.00546563	0.342114	0.402475	0.395261
Cytosolic sensors of pathogen-associated DNA	7	78	0.00546563	0.342114	0.402475	0.395261
RNA Polymerase II Promoter Escape	5	53	0.00371383	0.343523	0.402475	0.395261
NEP/NS2 Interacts with the Cellular Export Machinery	5	53	0.00371383	0.343523	0.402475	0.395261
Dual Incision in GG-NER	4	41	0.00287296	0.349404	0.402475	0.395261
Defective CFTR causes cystic fibrosis	6	66	0.00462476	0.349811	0.402475	0.395261
NR1H3 & NR1H2 regulate gene expression linked to cholesterol transport and efflux	6	66	0.00462476	0.349811	0.402475	0.395261
Dectin-1 mediated noncanonical NF-kB signaling	6	66	0.00462476	0.349811	0.402475	0.395261
Maturation of nucleoprotein	2	17	0.00119123	0.350999	0.402475	0.395261
TRAF6 mediated IRF7 activation in TLR7/8 or 9 signaling	2	17	0.00119123	0.350999	0.402475	0.395261
ATF6 (ATF6-alpha) activates chaperones	2	17	0.00119123	0.350999	0.402475	0.395261
Constitutive Signaling by AKT1 E17K in Cancer	3	29	0.00203209	0.353462	0.402475	0.395261
RUNX3 regulates BCL2L11 (BIM) transcription	1	6	0.000420433	0.353978	0.402475	0.395261
TFAP2 (AP-2) family regulates transcription of cell cycle factors	1	6	0.000420433	0.353978	0.402475	0.395261
TNFR1-mediated ceramide production	1	6	0.000420433	0.353978	0.402475	0.395261
Electric Transmission Across Gap Junctions	1	6	0.000420433	0.353978	0.402475	0.395261
Transmission across Electrical Synapses	1	6	0.000420433	0.353978	0.402475	0.395261
Hedgehog 'on' state	8	92	0.00644664	0.35625	0.402475	0.395261
Export of Viral Ribonucleoproteins from Nucleus	5	54	0.0037839	0.357751	0.402475	0.395261
Circadian Clock	9	105	0.00735758	0.357784	0.402475	0.395261
Assembly of collagen fibrils and other multimeric structures	6	67	0.00469484	0.362581	0.402475	0.395261
Recognition and association of DNA glycosylase with site containing an affected pyrimidine	4	42	0.00294303	0.365736	0.402475	0.395261
Switching of origins to a post-replicative state	8	93	0.00651671	0.367076	0.402475	0.395261
RNA Polymerase II Transcription Initiation And Promoter Clearance	5	55	0.00385397	0.372	0.402475	0.395261
Signaling by BMP	3	30	0.00210217	0.373085	0.402475	0.395261
CD209 (DC-SIGN) signaling	3	30	0.00210217	0.373085	0.402475	0.395261
APC/C:Cdc20 mediated degradation of Securin	6	68	0.00476491	0.375375	0.402475	0.395261
Beta oxidation of lauroyl-CoA to decanoyl-CoA-CoA	2	18	0.0012613	0.376958	0.402475	0.395261
YAP1- and WWTR1 (TAZ)-stimulated gene expression	2	18	0.0012613	0.376958	0.402475	0.395261
NRIF signals cell death from the nucleus	2	18	0.0012613	0.376958	0.402475	0.395261
TP53 Regulates Transcription of Death Receptors and Ligands	2	18	0.0012613	0.376958	0.402475	0.395261
TRAF3-dependent IRF activation pathway	2	18	0.0012613	0.376958	0.402475	0.395261
MAP3K8 (TPL2)-dependent MAPK1/3 activation	2	18	0.0012613	0.376958	0.402475	0.395261
cGMP effects	2	18	0.0012613	0.376958	0.402475	0.395261
Regulation of BACH1 activity	2	18	0.0012613	0.376958	0.402475	0.395261
Cell death signalling via NRAGE, NRIF and NADE	7	81	0.00567585	0.377143	0.402475	0.395261
G2/M DNA damage checkpoint	7	81	0.00567585	0.377143	0.402475	0.395261
Cellular response to chemical stress	17	212	0.0148553	0.377716	0.402475	0.395261
HSF1 activation	4	43	0.0030131	0.382048	0.402475	0.395261
FLT3 signaling in disease	4	43	0.0030131	0.382048	0.402475	0.395261
Transcriptional regulation by RUNX2	12	147	0.0103006	0.385062	0.402475	0.395261
Intraflagellar transport	5	56	0.00392404	0.386247	0.402475	0.395261
Collagen degradation	6	69	0.00483498	0.38818	0.402475	0.395261
Regulation of TP53 Activity through Phosphorylation	8	95	0.00665686	0.3888	0.402475	0.395261
NCAM1 interactions	4	44	0.00308318	0.398311	0.402475	0.395261
RHOU GTPase cycle	4	44	0.00308318	0.398311	0.402475	0.395261
Transcriptional regulation of white adipocyte differentiation	9	109	0.00763787	0.398449	0.402475	0.395261
NrCAM interactions	1	7	0.000490505	0.39936	0.402475	0.395261
SUMO is transferred from E1 to E2 (UBE2I, UBC9)	1	7	0.000490505	0.39936	0.402475	0.395261
IRS activation	1	7	0.000490505	0.39936	0.402475	0.395261
Fibronectin matrix formation	1	7	0.000490505	0.39936	0.402475	0.395261
Toxicity of botulinum toxin type G (botG)	1	7	0.000490505	0.39936	0.402475	0.395261
Nonhomologous End-Joining (NHEJ)	5	57	0.00399411	0.400477	0.402475	0.395261
Sema3A PAK dependent Axon repulsion	2	19	0.00133137	0.402475	0.402475	0.395261
Butyrate Response Factor 1 (BRF1) binds and destabilizes mRNA	2	19	0.00133137	0.402475	0.402475	0.395261
Tristetraprolin (TTP, ZFP36) binds and destabilizes mRNA	2	19	0.00133137	0.402475	0.402475	0.395261
InlB-mediated entry of Listeria monocytogenes into host cell	2	19	0.00133137	0.402475	0.402475	0.395261
TGF-beta receptor signaling in EMT (epithelial to mesenchymal transition)	2	19	0.00133137	0.402475	0.402475	0.395261
TICAM1, RIP1-mediated IKK complex recruitment	2	19	0.00133137	0.402475	0.402475	0.395261
Spry regulation of FGF signaling	2	19	0.00133137	0.402475	0.402475	0.395261
p75NTR signals via NF-kB	2	19	0.00133137	0.402475	0.402475	0.395261
FOXO-mediated transcription	9	110	0.00770794	0.40865	0.40865	0.388649
Resolution of AP sites via the multiple-nucleotide patch replacement pathway	3	32	0.00224231	0.411935	0.411935	0.385171
Glutamate Neurotransmitter Release Cycle	3	32	0.00224231	0.411935	0.411935	0.385171
Activated NOTCH1 Transmits Signal to the Nucleus	3	32	0.00224231	0.411935	0.411935	0.385171
MET activates PTK2 signaling	3	32	0.00224231	0.411935	0.411935	0.385171
Cleavage of the damaged purine	4	45	0.00315325	0.4145	0.4145	0.382475
Hedgehog 'off' state	10	124	0.00868895	0.416272	0.416272	0.380623
Telomere Maintenance	9	111	0.00777801	0.418851	0.418851	0.377941
Viral Messenger RNA Synthesis	6	72	0.0050452	0.426521	0.426521	0.37006
Activation of NF-kappaB in B cells	6	72	0.0050452	0.426521	0.426521	0.37006
Receptor-type tyrosine-protein phosphatases	2	20	0.00140144	0.427484	0.427484	0.36908
KSRP (KHSRP) binds and destabilizes mRNA	2	20	0.00140144	0.427484	0.427484	0.36908
Activation of IRF3/IRF7 mediated by TBK1/IKK epsilon	2	20	0.00140144	0.427484	0.427484	0.36908
Negative regulation of FLT3	2	20	0.00140144	0.427484	0.427484	0.36908
RHOJ GTPase cycle	5	59	0.00413426	0.428809	0.428809	0.367736
Elastic fibre formation	4	46	0.00322332	0.430592	0.430592	0.365935
Depurination	4	46	0.00322332	0.430592	0.430592	0.365935
RNA Polymerase III Abortive And Retractive Initiation	4	46	0.00322332	0.430592	0.430592	0.365935
RNA Polymerase III Transcription	4	46	0.00322332	0.430592	0.430592	0.365935
RNA Polymerase I Transcription Termination	3	33	0.00231238	0.431083	0.431083	0.365439
TP53 Regulates Transcription of Genes Involved in Cytochrome C Release	3	33	0.00231238	0.431083	0.431083	0.365439
Ub-specific processing proteases	16	206	0.0144349	0.431684	0.431684	0.364834
Autophagy	13	166	0.011632	0.433883	0.433883	0.362627
Cdc20:Phospho-APC/C mediated degradation of Cyclin A	6	73	0.00511527	0.439234	0.439234	0.357304
Noncanonical activation of NOTCH3	1	8	0.000560577	0.441557	0.441557	0.355013
PTK6 Regulates Cell Cycle	1	8	0.000560577	0.441557	0.441557	0.355013
Loss of MECP2 binding ability to the NCoR/SMRT complex	1	8	0.000560577	0.441557	0.441557	0.355013
Loss of Function of SMAD2/3 in Cancer	1	8	0.000560577	0.441557	0.441557	0.355013
Relaxin receptors	1	8	0.000560577	0.441557	0.441557	0.355013
Release of apoptotic factors from the mitochondria	1	8	0.000560577	0.441557	0.441557	0.355013
DDX58/IFIH1-mediated induction of interferon-alpha/beta	8	100	0.00700722	0.44315	0.44315	0.353449
Transcriptional Regulation by MECP2	8	100	0.00700722	0.44315	0.44315	0.353449
Formation of Incision Complex in GG-NER	4	47	0.00329339	0.446562	0.446562	0.350118
Attenuation phase	4	47	0.00329339	0.446562	0.446562	0.350118
DNA Double-Strand Break Repair	13	168	0.0117721	0.450617	0.450617	0.346192
Signaling by Hedgehog	13	168	0.0117721	0.450617	0.450617	0.346192
APC/C:Cdh1 mediated degradation of Cdc20 and other APC/C:Cdh1 targeted proteins in late mitosis/early G1	6	74	0.00518534	0.451893	0.451893	0.344965
APC:Cdc20 mediated degradation of cell cycle proteins prior to satisfation of the cell cycle checkpoint	6	74	0.00518534	0.451893	0.451893	0.344965
Defective B3GALT6 causes EDSP2 and SEMDJL1	2	21	0.00147152	0.451931	0.451931	0.344928
Defective B4GALT7 causes EDS, progeroid type	2	21	0.00147152	0.451931	0.451931	0.344928
Regulation of innate immune responses to cytosolic DNA	2	21	0.00147152	0.451931	0.451931	0.344928
mitochondrial fatty acid beta-oxidation of unsaturated fatty acids	2	21	0.00147152	0.451931	0.451931	0.344928
TFAP2 (AP-2) family regulates transcription of growth factors and their receptors	2	21	0.00147152	0.451931	0.451931	0.344928
Transcriptional regulation of testis differentiation	2	21	0.00147152	0.451931	0.451931	0.344928
Signaling by EGFR	5	61	0.0042744	0.456863	0.456863	0.340214
Signaling by FGFR2	7	88	0.00616635	0.458955	0.458955	0.33823
Signaling by Nuclear Receptors	29	387	0.0271179	0.463337	0.463337	0.334103
CDK-mediated phosphorylation and removal of Cdc6	6	75	0.00525541	0.464486	0.464486	0.333027
Termination of translesion DNA synthesis	3	35	0.00245253	0.468654	0.468654	0.329147
Endosomal Sorting Complex Required For Transport (ESCRT)	3	35	0.00245253	0.468654	0.468654	0.329147
Glucagon-type ligand receptors	3	35	0.00245253	0.468654	0.468654	0.329147
Amyloid fiber formation	7	89	0.00623642	0.470505	0.470505	0.327436
L1CAM interactions	10	130	0.00910938	0.473851	0.473851	0.324359
Defective B3GAT3 causes JDSSDHD	2	22	0.00154159	0.475771	0.475771	0.322602
Regulation of FZD by ubiquitination	2	22	0.00154159	0.475771	0.475771	0.322602
PI3K events in ERBB2 signaling	2	22	0.00154159	0.475771	0.475771	0.322602
Glycogen storage diseases	2	22	0.00154159	0.475771	0.475771	0.322602
APC/C:Cdc20 mediated degradation of mitotic proteins	6	76	0.00532549	0.477003	0.477003	0.321479
Intra-Golgi traffic	4	49	0.00343354	0.478057	0.478057	0.320521
FOXO-mediated transcription of oxidative stress, metabolic and neuronal genes	4	49	0.00343354	0.478057	0.478057	0.320521
Negative regulation of MAPK pathway	4	49	0.00343354	0.478057	0.478057	0.320521
Translation of Structural Proteins	4	49	0.00343354	0.478057	0.478057	0.320521
TFAP2A acts as a transcriptional repressor during retinoic acid induced cell differentiation	1	9	0.00063065	0.480792	0.480792	0.318042
RUNX3 regulates YAP1-mediated transcription	1	9	0.00063065	0.480792	0.480792	0.318042
Erythropoietin activates STAT5	1	9	0.00063065	0.480792	0.480792	0.318042
RAS signaling downstream of NF1 loss-of-function variants	1	9	0.00063065	0.480792	0.480792	0.318042
CREB phosphorylation	1	9	0.00063065	0.480792	0.480792	0.318042
Phase 3 - rapid repolarisation	1	9	0.00063065	0.480792	0.480792	0.318042
Intracellular metabolism of fatty acids regulates insulin secretion	1	9	0.00063065	0.480792	0.480792	0.318042
Signaling by TGF-beta Receptor Complex in Cancer	1	9	0.00063065	0.480792	0.480792	0.318042
Nef and signal transduction	1	9	0.00063065	0.480792	0.480792	0.318042
HDL clearance	1	9	0.00063065	0.480792	0.480792	0.318042
Neurofascin interactions	1	9	0.00063065	0.480792	0.480792	0.318042
Processing of DNA double-strand break ends	7	90	0.0063065	0.481993	0.481993	0.316959
Collagen formation	8	104	0.00728751	0.486146	0.486146	0.313234
SHC1 events in ERBB2 signaling	3	36	0.0025226	0.48702	0.48702	0.312453
Activation of APC/C and APC/C:Cdc20 mediated degradation of mitotic proteins	6	77	0.00539556	0.489432	0.489432	0.310307
Death Receptor Signalling	12	159	0.0111415	0.489538	0.489538	0.310213
RNA Polymerase I Transcription Initiation	4	50	0.00350361	0.493544	0.493544	0.306674
MTOR signalling	4	50	0.00350361	0.493544	0.493544	0.306674
Membrane Trafficking	49	667	0.0467381	0.49469	0.49469	0.305667
PCNA-Dependent Long Patch Base Excision Repair	2	23	0.00161166	0.498969	0.498969	0.301926
Polo-like kinase mediated events	2	23	0.00161166	0.498969	0.498969	0.301926
Signaling by cytosolic FGFR1 fusion mutants	2	23	0.00161166	0.498969	0.498969	0.301926
Serotonin Neurotransmitter Release Cycle	2	23	0.00161166	0.498969	0.498969	0.301926
PKA activation in glucagon signalling	2	23	0.00161166	0.498969	0.498969	0.301926
Depolymerisation of the Nuclear Lamina	2	23	0.00161166	0.498969	0.498969	0.301926
FOXO-mediated transcription of cell death genes	2	23	0.00161166	0.498969	0.498969	0.301926
Synaptic adhesion-like molecules	2	23	0.00161166	0.498969	0.498969	0.301926
HCMV Infection	20	270	0.0189195	0.499635	0.499635	0.301347
DNA Repair	28	380	0.0266274	0.500569	0.500569	0.300536
Synthesis of DNA	10	133	0.0093196	0.502256	0.502256	0.299074
Cargo concentration in the ER	3	37	0.00259267	0.505073	0.505073	0.296646
Negative regulators of DDX58/IFIH1 signaling	3	37	0.00259267	0.505073	0.505073	0.296646
Regulation of ornithine decarboxylase (ODC)	4	51	0.00357368	0.508834	0.508834	0.293424
Response of Mtb to phagocytosis	4	51	0.00357368	0.508834	0.508834	0.293424
Cleavage of the damaged pyrimidine	4	51	0.00357368	0.508834	0.508834	0.293424
Depyrimidination	4	51	0.00357368	0.508834	0.508834	0.293424
Progressive trimming of alpha-1,2-linked mannose residues from Man9/8/7GlcNAc2 to produce Man5GlcNAc2	1	10	0.000700722	0.517274	0.517274	0.28628
SOS-mediated signalling	1	10	0.000700722	0.517274	0.517274	0.28628
NR1H2 & NR1H3 regulate gene expression linked to gluconeogenesis	1	10	0.000700722	0.517274	0.517274	0.28628
Recycling of eIF2:GDP	1	10	0.000700722	0.517274	0.517274	0.28628
SHOC2 M1731 mutant abolishes MRAS complex function	1	10	0.000700722	0.517274	0.517274	0.28628
POU5F1 (OCT4), SOX2, NANOG repress genes related to differentiation	1	10	0.000700722	0.517274	0.517274	0.28628
NR1H2 & NR1H3 regulate gene expression to limit cholesterol uptake	1	10	0.000700722	0.517274	0.517274	0.28628
Uptake and function of diphtheria toxin	1	10	0.000700722	0.517274	0.517274	0.28628
CHL1 interactions	1	10	0.000700722	0.517274	0.517274	0.28628
Signaling by FGFR	8	107	0.00749772	0.517806	0.517806	0.285833
APC/C:Cdc20 mediated degradation of Cyclin B	2	24	0.00168173	0.521498	0.521498	0.282748
The NLRP3 inflammasome	2	24	0.00168173	0.521498	0.521498	0.282748
IKK complex recruitment mediated by RIP1	2	24	0.00168173	0.521498	0.521498	0.282748
Rap1 signalling	2	24	0.00168173	0.521498	0.521498	0.282748
E2F mediated regulation of DNA replication	2	24	0.00168173	0.521498	0.521498	0.282748
Regulation of signaling by CBL	2	24	0.00168173	0.521498	0.521498	0.282748
Other interleukin signaling	2	24	0.00168173	0.521498	0.521498	0.282748
Crosslinking of collagen fibrils	2	24	0.00168173	0.521498	0.521498	0.282748
G0 and Early G1	3	38	0.00266274	0.52279	0.52279	0.281673
Regulation of necroptotic cell death	3	38	0.00266274	0.52279	0.52279	0.281673
EPHB-mediated forward signaling	4	52	0.00364375	0.523912	0.523912	0.280741
Nuclear Events (kinase and transcription factor activation)	6	80	0.00560577	0.526101	0.526101	0.278931
Deubiquitination	21	289	0.0202509	0.533469	0.533469	0.272891
Interleukin-1 signaling	8	109	0.00763787	0.538539	0.538539	0.268783
Fanconi Anemia Pathway	4	53	0.00371383	0.538765	0.538765	0.268601
Vasopressin regulates renal water homeostasis via Aquaporins	4	53	0.00371383	0.538765	0.538765	0.268601
Cross-presentation of soluble exogenous antigens (endosomes)	4	53	0.00371383	0.538765	0.538765	0.268601
ALKBH3 mediated reversal of alkylation damage	1	11	0.000770794	0.551194	0.551194	0.258696
SUMOylation of immune response proteins	1	11	0.000770794	0.551194	0.551194	0.258696
Signaling by MRAS-complex mutants	1	11	0.000770794	0.551194	0.551194	0.258696
Gain-of-function MRAS complexes activate RAF signaling	1	11	0.000770794	0.551194	0.551194	0.258696
Toxicity of botulinum toxin type B (botB)	1	11	0.000770794	0.551194	0.551194	0.258696
Negative regulation of activity of TFAP2 (AP-2) family transcription factors	1	11	0.000770794	0.551194	0.551194	0.258696
RUNX1 regulates transcription of genes involved in differentiation of myeloid cells	1	11	0.000770794	0.551194	0.551194	0.258696
CREB1 phosphorylation through the activation of CaMKII/CaMKK/CaMKIV cascasde	1	11	0.000770794	0.551194	0.551194	0.258696
NOD1/2 Signaling Pathway	3	40	0.00280289	0.557149	0.557149	0.254028
Regulation of APC/C activators between G1/S and early anaphase	6	83	0.00581599	0.561658	0.561658	0.250528
RORA activates gene expression	2	26	0.00182188	0.564471	0.564471	0.248359
APC-Cdc20 mediated degradation of Nek2A	2	26	0.00182188	0.564471	0.564471	0.248359
Acetylcholine Neurotransmitter Release Cycle	2	26	0.00182188	0.564471	0.564471	0.248359
Lagging Strand Synthesis	2	26	0.00182188	0.564471	0.564471	0.248359
Prevention of phagosomal-lysosomal fusion	2	26	0.00182188	0.564471	0.564471	0.248359
Glycogen synthesis	2	26	0.00182188	0.564471	0.564471	0.248359
Constitutive Signaling by Ligand-Responsive EGFR Cancer Variants	2	26	0.00182188	0.564471	0.564471	0.248359
Signaling by Ligand-Responsive EGFR Variants in Cancer	2	26	0.00182188	0.564471	0.564471	0.248359
Calnexin/calreticulin cycle	3	41	0.00287296	0.573761	0.573761	0.241269
Gap junction assembly	3	41	0.00287296	0.573761	0.573761	0.241269
Gap junction trafficking and regulation	4	56	0.00392404	0.581847	0.581847	0.235191
GP1b-IX-V activation signalling	1	12	0.000840866	0.582732	0.582732	0.234531
Caspase activation via Dependence Receptors in the absence of ligand	1	12	0.000840866	0.582732	0.582732	0.234531
ARMS-mediated activation	1	12	0.000840866	0.582732	0.582732	0.234531
HuR (ELAVL1) binds and stabilizes mRNA	1	12	0.000840866	0.582732	0.582732	0.234531
AKT phosphorylates targets in the nucleus	1	12	0.000840866	0.582732	0.582732	0.234531
VLDLR internalisation and degradation	1	12	0.000840866	0.582732	0.582732	0.234531
WNT mediated activation of DVL	1	12	0.000840866	0.582732	0.582732	0.234531
Regulation of commissural axon pathfinding by SLIT and ROBO	1	12	0.000840866	0.582732	0.582732	0.234531
NOTCH4 Activation and Transmission of Signal to the Nucleus	1	12	0.000840866	0.582732	0.582732	0.234531
Mitochondrial calcium ion transport	2	27	0.00189195	0.584892	0.584892	0.232924
Muscle contraction	15	213	0.0149254	0.586442	0.586442	0.231775
Nucleotide-binding domain, leucine rich repeat containing receptor (NLR) signaling pathways	5	71	0.00497512	0.589163	0.589163	0.229764
RAC3 GTPase cycle	7	100	0.00700722	0.591836	0.591836	0.227799
Base Excision Repair	7	100	0.00700722	0.591836	0.591836	0.227799
Dopamine Neurotransmitter Release Cycle	2	28	0.00196202	0.604596	0.604596	0.218535
Ethanol oxidation	2	28	0.00196202	0.604596	0.604596	0.218535
Homology Directed Repair	9	130	0.00910938	0.604641	0.604641	0.218502
G1/S-Specific Transcription	3	43	0.0030131	0.605793	0.605793	0.217676
Signaling by ALK	3	43	0.0030131	0.605793	0.605793	0.217676
RND1 GTPase cycle	3	43	0.0030131	0.605793	0.605793	0.217676
RUNX2 regulates bone development	3	43	0.0030131	0.605793	0.605793	0.217676
Antigen processing: Ubiquitination & Proteasome degradation	22	315	0.0220727	0.607063	0.607063	0.216767
Erythropoietin activates Phospholipase C gamma (PLCG)	1	13	0.000910938	0.612057	0.612057	0.213208
Activation of PPARGC1A (PGC-1alpha) by phosphorylation	1	13	0.000910938	0.612057	0.612057	0.213208
WNT5A-dependent internalization of FZD2, FZD5 and ROR2	1	13	0.000910938	0.612057	0.612057	0.213208
PI3K/AKT activation	1	13	0.000910938	0.612057	0.612057	0.213208
Signal attenuation	1	13	0.000910938	0.612057	0.612057	0.213208
Processing and activation of SUMO	1	13	0.000910938	0.612057	0.612057	0.213208
MECP2 regulates transcription of neuronal ligands	1	13	0.000910938	0.612057	0.612057	0.213208
Physiological factors	1	13	0.000910938	0.612057	0.612057	0.213208
Regulation of the apoptosome activity	1	13	0.000910938	0.612057	0.612057	0.213208
CaMK IV-mediated phosphorylation of CREB	1	13	0.000910938	0.612057	0.612057	0.213208
Receptor Mediated Mitophagy	1	13	0.000910938	0.612057	0.612057	0.213208
Signaling by Leptin	1	13	0.000910938	0.612057	0.612057	0.213208
Formation of apoptosome	1	13	0.000910938	0.612057	0.612057	0.213208
Translation of Structural Proteins	5	73	0.00511527	0.613452	0.613452	0.21222
Nuclear Envelope (NE) Reassembly	6	88	0.00616635	0.617919	0.617919	0.209069
Signaling by MET	6	88	0.00616635	0.617919	0.617919	0.209069
Ovarian tumor domain proteases	3	44	0.00308318	0.621197	0.621197	0.206771
RND2 GTPase cycle	3	44	0.00308318	0.621197	0.621197	0.206771
VEGFR2 mediated vascular permeability	3	44	0.00308318	0.621197	0.621197	0.206771
HSF1-dependent transactivation	4	59	0.00413426	0.622519	0.622519	0.205848
RNA Pol II CTD phosphorylation and interaction with CE	2	29	0.00203209	0.623583	0.623583	0.205106
RNA Pol II CTD phosphorylation and interaction with CE during HIV infection	2	29	0.00203209	0.623583	0.623583	0.205106
Platelet homeostasis	8	118	0.00826852	0.626924	0.626924	0.202785
TP53 Regulates Transcription of DNA Repair Genes	6	89	0.00623642	0.628669	0.628669	0.201578
Transport to the Golgi and subsequent modification	15	219	0.0153458	0.628683	0.628683	0.201568
Neurexins and neuroligins	4	60	0.00420433	0.635506	0.635506	0.19688
Degradation of the extracellular matrix	10	148	0.0103707	0.635641	0.635641	0.196788
Transcriptional regulation of pluripotent stem cells	3	45	0.00315325	0.636185	0.636185	0.196417
MET promotes cell motility	3	45	0.00315325	0.636185	0.636185	0.196417
FGFRL1 modulation of FGFR1 signaling	1	14	0.00098101	0.639322	0.639322	0.19428
Suppression of apoptosis	1	14	0.00098101	0.639322	0.639322	0.19428
CD163 mediating an anti-inflammatory response	1	14	0.00098101	0.639322	0.639322	0.19428
TRAF6 mediated NF-kB activation	2	30	0.00210217	0.641856	0.641856	0.192563
Tight junction interactions	2	30	0.00210217	0.641856	0.641856	0.192563
Norepinephrine Neurotransmitter Release Cycle	2	30	0.00210217	0.641856	0.641856	0.192563
Insulin processing	2	30	0.00210217	0.641856	0.641856	0.192563
MHC class II antigen presentation	10	149	0.0104408	0.643844	0.643844	0.191219
Sensory processing of sound by inner hair cells of the cochlea	5	76	0.00532549	0.648261	0.648261	0.18825
Downstream signaling events of B Cell Receptor (BCR)	6	91	0.00637657	0.649635	0.649635	0.187331
RIPK1-mediated regulated necrosis	3	46	0.00322332	0.650754	0.650754	0.186583
RAS processing	3	46	0.00322332	0.650754	0.650754	0.186583
Macroautophagy	10	150	0.0105108	0.651945	0.651945	0.185789
A tetrasaccharide linker sequence is required for GAG synthesis	2	31	0.00217224	0.659421	0.659421	0.180837
Interleukin-7 signaling	2	31	0.00217224	0.659421	0.659421	0.180837
APC/C-mediated degradation of cell cycle proteins	6	92	0.00644664	0.659843	0.659843	0.18056
Regulation of mitotic cell cycle	6	92	0.00644664	0.659843	0.659843	0.18056
RAC2 GTPase cycle	6	92	0.00644664	0.659843	0.659843	0.18056
DSCAM interactions	1	15	0.00105108	0.664673	0.664673	0.177392
Scavenging by Class H Receptors	1	15	0.00105108	0.664673	0.664673	0.177392
HDR through MMEJ (alt-NHEJ)	1	15	0.00105108	0.664673	0.664673	0.177392
NR1H2 & NR1H3 regulate gene expression to control bile acid homeostasis	1	15	0.00105108	0.664673	0.664673	0.177392
Activation of RAC1	1	15	0.00105108	0.664673	0.664673	0.177392
Negative regulation of TCF-dependent signaling by WNT ligand antagonists	1	15	0.00105108	0.664673	0.664673	0.177392
Protein-protein interactions at synapses	6	93	0.00651671	0.669863	0.669863	0.174014
Base-Excision Repair, AP Site Formation	4	63	0.00441455	0.672697	0.672697	0.17218
Postmitotic nuclear pore complex (NPC) reformation	2	32	0.00224231	0.676289	0.676289	0.169868
Signaling by FLT3 fusion proteins	2	32	0.00224231	0.676289	0.676289	0.169868
Suppression of phagosomal maturation	2	32	0.00224231	0.676289	0.676289	0.169868
Signaling by EGFR in Cancer	2	32	0.00224231	0.676289	0.676289	0.169868
Resolution of Abasic Sites (AP sites)	3	48	0.00336346	0.678627	0.678627	0.168369
MyD88 cascade initiated on plasma membrane	6	94	0.00658678	0.679694	0.679694	0.167686
Toll Like Receptor 10 (TLR10) Cascade	6	94	0.00658678	0.679694	0.679694	0.167686
Toll Like Receptor 5 (TLR5) Cascade	6	94	0.00658678	0.679694	0.679694	0.167686
HDR through Homologous Recombination (HRR) or Single Strand Annealing (SSA)	8	124	0.00868895	0.680381	0.680381	0.167248
Sensory processing of sound by outer hair cells of the cochlea	4	64	0.00448462	0.684494	0.684494	0.16463
Erythropoietin activates Phosphoinositide-3-kinase (PI3K)	1	16	0.00112115	0.688244	0.688244	0.162258
RUNX3 regulates p14-ARF	1	16	0.00112115	0.688244	0.688244	0.162258
Leading Strand Synthesis	1	16	0.00112115	0.688244	0.688244	0.162258
Beta oxidation of palmitoyl-CoA to myristoyl-CoA	1	16	0.00112115	0.688244	0.688244	0.162258
Polymerase switching	1	16	0.00112115	0.688244	0.688244	0.162258
SHC-related events triggered by IGF1R	1	16	0.00112115	0.688244	0.688244	0.162258
Constitutive Signaling by Overexpressed ERBB2	1	16	0.00112115	0.688244	0.688244	0.162258
Advanced glycosylation endproduct receptor signaling	1	16	0.00112115	0.688244	0.688244	0.162258
Reversal of alkylation damage by DNA dioxygenases	1	16	0.00112115	0.688244	0.688244	0.162258
Trafficking and processing of endosomal TLR	1	16	0.00112115	0.688244	0.688244	0.162258
Pervasive developmental disorders	1	16	0.00112115	0.688244	0.688244	0.162258
Disorders of Nervous System Development	1	16	0.00112115	0.688244	0.688244	0.162258
Disorders of Developmental Biology	1	16	0.00112115	0.688244	0.688244	0.162258
Loss of function of MECP2 in Rett syndrome	1	16	0.00112115	0.688244	0.688244	0.162258
Platelet Adhesion to exposed collagen	1	16	0.00112115	0.688244	0.688244	0.162258
AKT phosphorylates targets in the cytosol	1	16	0.00112115	0.688244	0.688244	0.162258
p75 NTR receptor-mediated signalling	7	110	0.00770794	0.688616	0.688616	0.162023
Glycolysis	7	110	0.00770794	0.688616	0.688616	0.162023
Metabolism of polyamines	5	80	0.00560577	0.691478	0.691478	0.160222
Scavenging by Class A Receptors	3	49	0.00343354	0.691931	0.691931	0.159937
ER Quality Control Compartment (ERQC)	2	33	0.00231238	0.69247	0.69247	0.159599
Platelet degranulation	9	141	0.00988018	0.697467	0.697467	0.156476
Post NMDA receptor activation events	6	96	0.00672693	0.698781	0.698781	0.155659
Glucagon-like Peptide-1 (GLP1) regulates insulin secretion	3	50	0.00350361	0.704816	0.704816	0.151924
Citric acid cycle (TCA cycle)	3	50	0.00350361	0.704816	0.704816	0.151924
Interleukin-3, Interleukin-5 and GM-CSF signaling	3	50	0.00350361	0.704816	0.704816	0.151924
Inflammasomes	2	34	0.00238245	0.707977	0.707977	0.149981
Negative regulation of FGFR3 signaling	2	34	0.00238245	0.707977	0.707977	0.149981
RUNX2 regulates osteoblast differentiation	2	34	0.00238245	0.707977	0.707977	0.149981
NR1H2 & NR1H3 regulate gene expression linked to lipogenesis	1	17	0.00119123	0.710159	0.710159	0.148644
vRNA Synthesis	1	17	0.00119123	0.710159	0.710159	0.148644
Phase 2 - plateau phase	1	17	0.00119123	0.710159	0.710159	0.148644
Frs2-mediated activation	1	17	0.00119123	0.710159	0.710159	0.148644
Signaling by Activin	1	17	0.00119123	0.710159	0.710159	0.148644
PI5P Regulates TP53 Acetylation	1	17	0.00119123	0.710159	0.710159	0.148644
Processing of SMDT1	1	17	0.00119123	0.710159	0.710159	0.148644
CREB1 phosphorylation through the activation of Adenylate Cyclase	1	17	0.00119123	0.710159	0.710159	0.148644
CD28 dependent Vav1 pathway	1	17	0.00119123	0.710159	0.710159	0.148644
Signaling by NTRK1 (TRKA)	9	143	0.0100203	0.712775	0.712775	0.147048
TP53 Regulates Transcription of Cell Death Genes	5	83	0.00581599	0.721419	0.721419	0.141812
MAPK family signaling cascades	25	380	0.0266274	0.722662	0.722662	0.141065
mRNA Capping	2	35	0.00245253	0.722825	0.722825	0.140967
Negative regulation of FGFR4 signaling	2	35	0.00245253	0.722825	0.722825	0.140967
Nitric oxide stimulates guanylate cyclase	2	35	0.00245253	0.722825	0.722825	0.140967
Platelet calcium homeostasis	2	35	0.00245253	0.722825	0.722825	0.140967
RAF/MAP kinase cascade	21	322	0.0225632	0.723713	0.723713	0.140433
ABC transporter disorders	6	99	0.00693715	0.725951	0.725951	0.139093
Class B/2 (Secretin family receptors)	6	99	0.00693715	0.725951	0.725951	0.139093
Gap junction trafficking	3	52	0.00364375	0.729342	0.729342	0.137069
N-glycan trimming and elongation in the cis-Golgi	1	18	0.0012613	0.730535	0.730535	0.136359
Beta oxidation of hexanoyl-CoA to butanoyl-CoA	1	18	0.0012613	0.730535	0.730535	0.136359
Beta oxidation of octanoyl-CoA to hexanoyl-CoA	1	18	0.0012613	0.730535	0.730535	0.136359
CRMPs in Sema3A signaling	1	18	0.0012613	0.730535	0.730535	0.136359
STAT3 nuclear events downstream of ALK signaling	1	18	0.0012613	0.730535	0.730535	0.136359
Acyl chain remodeling of CL	1	18	0.0012613	0.730535	0.730535	0.136359
Protein ubiquitination	5	84	0.00588606	0.730925	0.730925	0.136127
Activation of the pre-replicative complex	2	36	0.0025226	0.737031	0.737031	0.132514
Energy dependent regulation of mTOR by LKB1-AMPK	2	36	0.0025226	0.737031	0.737031	0.132514
RHO GTPases activate IQGAPs	2	36	0.0025226	0.737031	0.737031	0.132514
Regulation of TLR by endogenous ligand	2	36	0.0025226	0.737031	0.737031	0.132514
Aquaporin-mediated transport	4	69	0.00483498	0.738945	0.738945	0.131388
MAP kinase activation	4	69	0.00483498	0.738945	0.738945	0.131388
TRAF6 mediated induction of NFkB and MAP kinases upon TLR7/8 or 9 activation	6	101	0.00707729	0.743084	0.743084	0.128962
Response to elevated platelet cytosolic Ca2+	9	148	0.0103707	0.748799	0.748799	0.125635
Integrin cell surface interactions	5	86	0.00602621	0.749225	0.749225	0.125388
G alpha (12/13) signalling events	5	86	0.00602621	0.749225	0.749225	0.125388
Erythropoietin activates RAS	1	19	0.00133137	0.74948	0.74948	0.12524
G beta:gamma signalling through BTK	1	19	0.00133137	0.74948	0.74948	0.12524
Processing of Intronless Pre-mRNAs	1	19	0.00133137	0.74948	0.74948	0.12524
p38MAPK events	1	19	0.00133137	0.74948	0.74948	0.12524
DNA Damage Reversal	1	19	0.00133137	0.74948	0.74948	0.12524
Protein repair	1	19	0.00133137	0.74948	0.74948	0.12524
RIP-mediated NFkB activation via ZBP1	1	19	0.00133137	0.74948	0.74948	0.12524
Threonine catabolism	1	19	0.00133137	0.74948	0.74948	0.12524
Processive synthesis on the lagging strand	1	19	0.00133137	0.74948	0.74948	0.12524
Other semaphorin interactions	1	19	0.00133137	0.74948	0.74948	0.12524
Cell-extracellular matrix interactions	1	19	0.00133137	0.74948	0.74948	0.12524
MyD88 dependent cascade initiated on endosome	6	102	0.00714736	0.751357	0.751357	0.124154
Factors involved in megakaryocyte development and platelet production	12	194	0.013594	0.752051	0.752051	0.123753
MAPK1/MAPK3 signaling	21	329	0.0230537	0.757309	0.757309	0.120727
Sensory processing of sound	5	87	0.00609628	0.758022	0.758022	0.120318
Toll Like Receptor 7/8 (TLR7/8) Cascade	6	103	0.00721743	0.759435	0.759435	0.11951
Signaling by NTRKs	10	166	0.011632	0.766552	0.766552	0.115459
SUMOylation of transcription factors	1	20	0.00140144	0.767094	0.767094	0.115151
Prolonged ERK activation events	1	20	0.00140144	0.767094	0.767094	0.115151
Acetylcholine regulates insulin secretion	1	20	0.00140144	0.767094	0.767094	0.115151
TNFR2 non-canonical NF-kB pathway	6	104	0.00728751	0.767318	0.767318	0.115025
CLEC7A (Dectin-1) signaling	7	120	0.00840866	0.769309	0.769309	0.113899
CREB1 phosphorylation through NMDA receptor-mediated activation of RAS signaling	2	39	0.00273281	0.775963	0.775963	0.110159
FGFR1 mutant receptor activation	2	39	0.00273281	0.775963	0.775963	0.110159
Activation of ATR in response to replication stress	2	39	0.00273281	0.775963	0.775963	0.110159
Negative regulation of FGFR1 signaling	2	39	0.00273281	0.775963	0.775963	0.110159
CD28 co-stimulation	2	39	0.00273281	0.775963	0.775963	0.110159
EGR2 and SOX10-mediated initiation of Schwann cell myelination	2	39	0.00273281	0.775963	0.775963	0.110159
Signaling by BRAF and RAF1 fusions	4	73	0.00511527	0.777143	0.777143	0.109499
Toll Like Receptor 9 (TLR9) Cascade	6	106	0.00742765	0.782506	0.782506	0.106513
ABC-family proteins mediated transport	7	122	0.00854881	0.783449	0.783449	0.105989
POU5F1 (OCT4), SOX2, NANOG activate genes related to proliferation	1	21	0.00147152	0.783471	0.783471	0.105977
G beta:gamma signalling through CDC42	1	21	0.00147152	0.783471	0.783471	0.105977
Beta oxidation of decanoyl-CoA to octanoyl-CoA-CoA	1	21	0.00147152	0.783471	0.783471	0.105977
N-glycan trimming in the ER and Calnexin/Calreticulin cycle	3	57	0.00399411	0.78363	0.78363	0.105889
SUMOylation of intracellular receptors	2	40	0.00280289	0.787773	0.787773	0.103599
Striated Muscle Contraction	2	40	0.00280289	0.787773	0.787773	0.103599
HS-GAG biosynthesis	2	40	0.00280289	0.787773	0.787773	0.103599
Glucagon signaling in metabolic regulation	2	40	0.00280289	0.787773	0.787773	0.103599
Downstream TCR signaling	7	124	0.00868895	0.796933	0.796933	0.0985782
Microtubule-dependent trafficking of connexons from Golgi to the plasma membrane	1	22	0.00154159	0.798697	0.798697	0.0976178
Mismatch repair (MMR) directed by MSH2:MSH3 (MutSbeta)	1	22	0.00154159	0.798697	0.798697	0.0976178
Mismatch repair (MMR) directed by MSH2:MSH6 (MutSalpha)	1	22	0.00154159	0.798697	0.798697	0.0976178
Vitamin D (calciferol) metabolism	1	22	0.00154159	0.798697	0.798697	0.0976178
RAF activation	2	41	0.00287296	0.799031	0.799031	0.0974362
Negative regulation of FGFR2 signaling	2	41	0.00287296	0.799031	0.799031	0.0974362
Oncogenic MAPK signaling	5	93	0.00651671	0.80597	0.80597	0.0936813
Signalling to ERKs	2	42	0.00294303	0.809757	0.809757	0.0916453
PERK regulates gene expression	2	42	0.00294303	0.809757	0.809757	0.0916453
Plasma lipoprotein clearance	2	42	0.00294303	0.809757	0.809757	0.0916453
Interleukin-17 signaling	4	77	0.00539556	0.810785	0.810785	0.0910944
G beta:gamma signalling through PLC beta	1	23	0.00161166	0.812854	0.812854	0.0899875
Presynaptic function of Kainate receptors	1	23	0.00161166	0.812854	0.812854	0.0899875
Transport of connexons to the plasma membrane	1	23	0.00161166	0.812854	0.812854	0.0899875
Signaling by ERBB2 ECD mutants	1	23	0.00161166	0.812854	0.812854	0.0899875
Platelet sensitization by LDL	1	23	0.00161166	0.812854	0.812854	0.0899875
ZBP1(DAI) mediated induction of type I IFNs	1	23	0.00161166	0.812854	0.812854	0.0899875
Mismatch Repair	1	23	0.00161166	0.812854	0.812854	0.0899875
RNA polymerase II transcribes snRNA genes	5	94	0.00658678	0.813178	0.813178	0.0898142
Glycogen metabolism	2	43	0.0030131	0.819969	0.819969	0.0862026
E3 ubiquitin ligases ubiquitinate target proteins	3	61	0.0042744	0.820295	0.820295	0.0860297
Signaling by FGFR2 IIIa TM	1	24	0.00168173	0.826016	0.826016	0.0830117
Gastrin-CREB signalling pathway via PKC and MAPK	1	24	0.00168173	0.826016	0.826016	0.0830117
Signaling by FGFR1	3	62	0.00434447	0.828591	0.828591	0.0816599
Signaling by high-kinase activity BRAF mutants	2	44	0.00308318	0.829687	0.829687	0.0810859
TRAF6 mediated IRF7 activation	2	44	0.00308318	0.829687	0.829687	0.0810859
HS-GAG degradation	2	44	0.00308318	0.829687	0.829687	0.0810859
Synthesis, secretion, and inactivation of Glucagon-like Peptide-1 (GLP-1)	2	44	0.00308318	0.829687	0.829687	0.0810859
Activation of NMDA receptors and postsynaptic events	6	113	0.00791816	0.829757	0.829757	0.0810489
Interconversion of nucleotide di- and triphosphates	4	80	0.00560577	0.833197	0.833197	0.0792524
Neddylation	14	241	0.0168874	0.835019	0.835019	0.0783038
G alpha (z) signalling events	3	63	0.00441455	0.836556	0.836556	0.0775051
TCR signaling	8	147	0.0103006	0.837899	0.837899	0.0768084
CTLA4 inhibitory signaling	1	25	0.0017518	0.838253	0.838253	0.076625
Insertion of tail-anchored proteins into the endoplasmic reticulum membrane	1	25	0.0017518	0.838253	0.838253	0.076625
Post-chaperonin tubulin folding pathway	1	25	0.0017518	0.838253	0.838253	0.076625
Signaling by NODAL	1	25	0.0017518	0.838253	0.838253	0.076625
VxPx cargo-targeting to cilium	1	25	0.0017518	0.838253	0.838253	0.076625
Serine biosynthesis	1	25	0.0017518	0.838253	0.838253	0.076625
Vesicle-mediated transport	53	827	0.0579497	0.847384	0.847384	0.0719199
Heme biosynthesis	2	46	0.00322332	0.847715	0.847715	0.0717503
MyD88 deficiency (TLR2/4)	1	26	0.00182188	0.84963	0.84963	0.0707702
G-protein activation	1	26	0.00182188	0.84963	0.84963	0.0707702
ADP signalling through P2Y purinoceptor 12	1	26	0.00182188	0.84963	0.84963	0.0707702
PKA-mediated phosphorylation of CREB	1	26	0.00182188	0.84963	0.84963	0.0707702
Signalling to RAS	1	26	0.00182188	0.84963	0.84963	0.0707702
CD28 dependent PI3K/Akt signaling	1	26	0.00182188	0.84963	0.84963	0.0707702
Basigin interactions	1	26	0.00182188	0.84963	0.84963	0.0707702
MyD88:MAL(TIRAP) cascade initiated on plasma membrane	6	118	0.00826852	0.858199	0.858199	0.0664119
Toll Like Receptor TLR6:TLR2 Cascade	6	118	0.00826852	0.858199	0.858199	0.0664119
Unblocking of NMDA receptors, glutamate binding and activation	1	27	0.00189195	0.860208	0.860208	0.0653967
Ras activation upon Ca2+ influx through NMDA receptor	1	27	0.00189195	0.860208	0.860208	0.0653967
IRAK4 deficiency (TLR2/4)	1	27	0.00189195	0.860208	0.860208	0.0653967
Abortive elongation of HIV-1 transcript in the absence of Tat	1	27	0.00189195	0.860208	0.860208	0.0653967
FOXO-mediated transcription of cell cycle genes	1	27	0.00189195	0.860208	0.860208	0.0653967
Negative regulation of NMDA receptor-mediated neuronal transmission	1	27	0.00189195	0.860208	0.860208	0.0653967
Pregnenolone biosynthesis	1	27	0.00189195	0.860208	0.860208	0.0653967
Signaling by NTRK3 (TRKC)	1	27	0.00189195	0.860208	0.860208	0.0653967
Toll Like Receptor 3 (TLR3) Cascade	5	102	0.00714736	0.863382	0.863382	0.0637968
Purine ribonucleoside monophosphate biosynthesis	2	48	0.00336346	0.86399	0.86399	0.0634915
Incretin synthesis, secretion, and inactivation	2	48	0.00336346	0.86399	0.86399	0.0634915
FLT3 Signaling	2	48	0.00336346	0.86399	0.86399	0.0634915
Peroxisomal protein import	3	67	0.00469484	0.865296	0.865296	0.0628353
Neurotoxicity of clostridium toxins	1	28	0.00196202	0.870042	0.870042	0.0604599
Free fatty acids regulate insulin secretion	1	28	0.00196202	0.870042	0.870042	0.0604599
Transport of organic anions	1	28	0.00196202	0.870042	0.870042	0.0604599
Nuclear Receptor transcription pathway	4	86	0.00602621	0.871398	0.871398	0.0597836
Signaling by RAF1 mutants	2	49	0.00343354	0.871515	0.871515	0.0597252
MAP2K and MAPK activation	2	49	0.00343354	0.871515	0.871515	0.0597252
Signaling by FGFR1 in disease	2	49	0.00343354	0.871515	0.871515	0.0597252
Assembly and cell surface presentation of NMDA receptors	2	49	0.00343354	0.871515	0.871515	0.0597252
tRNA Aminoacylation	3	68	0.00476491	0.871748	0.871748	0.0596092
Extracellular matrix organization	19	329	0.0230537	0.872649	0.872649	0.0591605
Toll Like Receptor TLR1:TLR2 Cascade	6	121	0.00847873	0.873304	0.873304	0.0588345
Toll Like Receptor 2 (TLR2) Cascade	6	121	0.00847873	0.873304	0.873304	0.0588345
Unfolded Protein Response (UPR)	8	155	0.0108612	0.875621	0.875621	0.0576838
Mitochondrial protein import	3	69	0.00483498	0.877925	0.877925	0.0565428
Cytosolic tRNA aminoacylation	2	50	0.00350361	0.878655	0.878655	0.0561815
G beta:gamma signalling through PI3Kgamma	1	29	0.00203209	0.879185	0.879185	0.0559199
Estrogen-dependent nuclear events downstream of ESR-membrane signaling	1	29	0.00203209	0.879185	0.879185	0.0559199
Response of EIF2AK1 (HRI) to heme deficiency	1	29	0.00203209	0.879185	0.879185	0.0559199
Synthesis of UDP-N-acetyl-glucosamine	1	29	0.00203209	0.879185	0.879185	0.0559199
Syndecan interactions	1	29	0.00203209	0.879185	0.879185	0.0559199
The role of Nef in HIV-1 replication and disease pathogenesis	1	29	0.00203209	0.879185	0.879185	0.0559199
Growth hormone receptor signaling	1	29	0.00203209	0.879185	0.879185	0.0559199
ER-Phagosome pathway	9	173	0.0121225	0.88173	0.88173	0.0546644
Glucose metabolism	7	140	0.0098101	0.882751	0.882751	0.0541618
Signaling by PDGF	3	70	0.00490505	0.883836	0.883836	0.0536283
Regulation of insulin secretion	5	106	0.00742765	0.883909	0.883909	0.0535922
Synthesis of very long-chain fatty acyl-CoAs	2	51	0.00357368	0.885427	0.885427	0.052847
Telomere C-strand (Lagging Strand) Synthesis	2	51	0.00357368	0.885427	0.885427	0.052847
Na+/Cl- dependent neurotransmitter transporters	2	51	0.00357368	0.885427	0.885427	0.052847
Signaling by FGFR4	2	51	0.00357368	0.885427	0.885427	0.052847
PI3K/AKT Signaling in Cancer	6	124	0.00868895	0.88704	0.88704	0.0520567
Thromboxane signalling through TP receptor	1	30	0.00210217	0.887685	0.887685	0.0517411
ADP signalling through P2Y purinoceptor 1	1	30	0.00210217	0.887685	0.887685	0.0517411
TRIF(TICAM1)-mediated TLR4 signaling	5	107	0.00749772	0.888609	0.888609	0.0512893
MyD88-independent TLR4 cascade	5	107	0.00749772	0.888609	0.888609	0.0512893
HDR through Homologous Recombination (HRR)	3	72	0.0050452	0.894898	0.894898	0.0482266
Activation of G protein gated Potassium channels	1	31	0.00217224	0.895588	0.895588	0.0478918
Inhibition of voltage gated Ca2+ channels via Gbeta/gamma subunits	1	31	0.00217224	0.895588	0.895588	0.0478918
G protein gated Potassium channels	1	31	0.00217224	0.895588	0.895588	0.0478918
Polymerase switching on the C-strand of the telomere	1	31	0.00217224	0.895588	0.895588	0.0478918
MicroRNA (miRNA) biogenesis	1	31	0.00217224	0.895588	0.895588	0.0478918
Acyl chain remodelling of PS	1	31	0.00217224	0.895588	0.895588	0.0478918
PIWI-interacting RNA (piRNA) biogenesis	1	31	0.00217224	0.895588	0.895588	0.0478918
Retinoid cycle disease events	1	31	0.00217224	0.895588	0.895588	0.0478918
Diseases of the neuronal system	1	31	0.00217224	0.895588	0.895588	0.0478918
Diseases associated with visual transduction	1	31	0.00217224	0.895588	0.895588	0.0478918
mitochondrial fatty acid beta-oxidation of saturated fatty acids	2	53	0.00371383	0.897933	0.897933	0.046756
Signaling by FGFR3	2	53	0.00371383	0.897933	0.897933	0.046756
Antigen processing-Cross presentation	10	195	0.0136641	0.901173	0.901173	0.0451917
Adrenaline,noradrenaline inhibits insulin secretion	1	32	0.00224231	0.902935	0.902935	0.0443435
Caspase activation via extrinsic apoptotic signalling pathway	1	32	0.00224231	0.902935	0.902935	0.0443435
MECP2 regulates neuronal receptors and channels	1	32	0.00224231	0.902935	0.902935	0.0443435
Signaling downstream of RAS mutants	2	54	0.0037839	0.903698	0.903698	0.0439767
Signaling by moderate kinase activity BRAF mutants	2	54	0.0037839	0.903698	0.903698	0.0439767
Paradoxical activation of RAF signaling by kinase inactive BRAF	2	54	0.0037839	0.903698	0.903698	0.0439767
Signaling by RAS mutants	2	54	0.0037839	0.903698	0.903698	0.0439767
Cell recruitment (pro-inflammatory response)	2	54	0.0037839	0.903698	0.903698	0.0439767
Purinergic signaling in leishmaniasis infection	2	54	0.0037839	0.903698	0.903698	0.0439767
Inactivation, recovery and regulation of the phototransduction cascade	2	54	0.0037839	0.903698	0.903698	0.0439767
SARS-CoV-1 Infection	4	93	0.00651671	0.906209	0.906209	0.0427714
Recycling pathway of L1	2	55	0.00385397	0.909157	0.909157	0.0413609
Diseases associated with glycosaminoglycan metabolism	2	55	0.00385397	0.909157	0.909157	0.0413609
Retrograde transport at the Trans-Golgi-Network	2	55	0.00385397	0.909157	0.909157	0.0413609
SARS-CoV-2 Infection	5	112	0.00784808	0.909724	0.909724	0.0410902
Processive synthesis on the C-strand of the telomere	1	33	0.00231238	0.909766	0.909766	0.0410704
Signal Transduction	201	2997	0.210006	0.912173	0.912173	0.0399227
XBP1(S) activates chaperone genes	4	95	0.00665686	0.914488	0.914488	0.0388218
Activation of AMPK downstream of NMDARs	1	34	0.00238245	0.916116	0.916116	0.0380494
Activation of kainate receptors upon glutamate binding	1	34	0.00238245	0.916116	0.916116	0.0380494
ATF4 activates genes in response to endoplasmic reticulum stress	1	34	0.00238245	0.916116	0.916116	0.0380494
Interleukin-1 family signaling	8	167	0.0117021	0.918427	0.918427	0.0369554
Cargo recognition for clathrin-mediated endocytosis	5	115	0.0080583	0.920638	0.920638	0.0359113
Signaling by Erythropoietin	1	35	0.00245253	0.92202	0.92202	0.0352596
MAPK targets/ Nuclear events mediated by MAP kinases	1	35	0.00245253	0.92202	0.92202	0.0352596
Activation of Matrix Metalloproteinases	1	35	0.00245253	0.92202	0.92202	0.0352596
Synthesis of Prostaglandins (PG) and Thromboxanes (TX)	2	58	0.00406419	0.923845	0.923845	0.0344008
C-type lectin receptors (CLRs)	10	203	0.0142247	0.924132	0.924132	0.0342661
Retinoid metabolism and transport	3	79	0.0055357	0.926531	0.926531	0.0331402
Thrombin signalling through proteinase activated receptors (PARs)	1	36	0.0025226	0.927509	0.927509	0.0326819
Miscellaneous transport and binding events	1	36	0.0025226	0.927509	0.927509	0.0326819
Nicotinamide salvaging	2	59	0.00413426	0.928222	0.928222	0.032348
The phototransduction cascade	2	59	0.00413426	0.928222	0.928222	0.032348
Uptake and actions of bacterial toxins	2	60	0.00420433	0.932361	0.932361	0.030416
Formation of the HIV-1 Early Elongation Complex	1	37	0.00259267	0.932612	0.932612	0.0302992
Formation of the Early Elongation Complex	1	37	0.00259267	0.932612	0.932612	0.0302992
GABA synthesis, release, reuptake and degradation	1	37	0.00259267	0.932612	0.932612	0.0302992
IRE1alpha activates chaperones	4	101	0.00707729	0.935546	0.935546	0.0289347
Amino acids regulate mTORC1	2	61	0.0042744	0.936273	0.936273	0.0285976
Golgi Associated Vesicle Biogenesis	2	61	0.0042744	0.936273	0.936273	0.0285976
Nucleotide biosynthesis	2	61	0.0042744	0.936273	0.936273	0.0285976
Signaling by FGFR in disease	3	82	0.00574592	0.937199	0.937199	0.0281683
Inwardly rectifying K+ channels	1	38	0.00266274	0.937356	0.937356	0.0280957
Beta-oxidation of very long chain fatty acids	1	38	0.00266274	0.937356	0.937356	0.0280957
PPARA activates gene expression	8	175	0.0122626	0.939345	0.939345	0.027175
HCMV Late Events	8	175	0.0122626	0.939345	0.939345	0.027175
Iron uptake and transport	3	83	0.00581599	0.940424	0.940424	0.0266762
Defective B3GALTL causes PpS	1	39	0.00273281	0.941766	0.941766	0.0260571
G-protein beta:gamma signalling	1	39	0.00273281	0.941766	0.941766	0.0260571
Sealing of the nuclear envelope (NE) by ESCRT-III	1	39	0.00273281	0.941766	0.941766	0.0260571
Synthesis of IP3 and IP4 in the cytosol	1	39	0.00273281	0.941766	0.941766	0.0260571
Signaling by Interleukins	37	643	0.0450564	0.942769	0.942769	0.0255945
CDC42 GTPase cycle	7	159	0.0111415	0.943134	0.943134	0.0254267
RHOQ GTPase cycle	2	63	0.00441455	0.943462	0.943462	0.0252756
Regulation of lipid metabolism by PPARalpha	8	177	0.0124028	0.943775	0.943775	0.0251316
Acyl chain remodelling of PC	1	40	0.00280289	0.945866	0.945866	0.0241705
Ion homeostasis	2	64	0.00448462	0.946761	0.946761	0.0237598
NRAGE signals death through JNK	2	64	0.00448462	0.946761	0.946761	0.0237598
Clathrin-mediated endocytosis	7	161	0.0112816	0.947514	0.947514	0.0234143
O-glycosylation of TSR domain-containing proteins	1	41	0.00287296	0.949677	0.949677	0.0224239
Signal amplification	1	41	0.00287296	0.949677	0.949677	0.0224239
RHO GTPases Activate WASPs and WAVEs	1	41	0.00287296	0.949677	0.949677	0.0224239
RA biosynthesis pathway	1	41	0.00287296	0.949677	0.949677	0.0224239
Gluconeogenesis	2	66	0.00462476	0.952816	0.952816	0.0209911
Diseases of Immune System	1	42	0.00294303	0.953221	0.953221	0.0208065
Diseases associated with the TLR signaling cascade	1	42	0.00294303	0.953221	0.953221	0.0208065
Acyl chain remodelling of PE	1	42	0.00294303	0.953221	0.953221	0.0208065
VEGFA-VEGFR2 Pathway	5	127	0.00889917	0.953482	0.953482	0.0206874
Calmodulin induced events	1	43	0.0030131	0.956515	0.956515	0.0193082
CaM pathway	1	43	0.0030131	0.956515	0.956515	0.0193082
FGFR2 mutant receptor activation	1	43	0.0030131	0.956515	0.956515	0.0193082
BMAL1:CLOCK,NPAS2 activates circadian gene expression	1	43	0.0030131	0.956515	0.956515	0.0193082
RET signaling	1	43	0.0030131	0.956515	0.956515	0.0193082
Metabolism of fat-soluble vitamins	3	89	0.00623642	0.956763	0.956763	0.0191958
GABA receptor activation	2	68	0.00476491	0.958209	0.958209	0.0185396
Voltage gated Potassium channels	1	44	0.00308318	0.959577	0.959577	0.01792
Lysine catabolism	1	44	0.00308318	0.959577	0.959577	0.01792
Extra-nuclear estrogen signaling	4	111	0.00777801	0.960427	0.960427	0.0175354
IRS-related events triggered by IGF1R	2	69	0.00483498	0.960679	0.960679	0.0174215
Extension of Telomeres	2	69	0.00483498	0.960679	0.960679	0.0174215
Detoxification of Reactive Oxygen Species	2	69	0.00483498	0.960679	0.960679	0.0174215
Purine salvage	1	45	0.00315325	0.962424	0.962424	0.0166334
Toll Like Receptor 4 (TLR4) Cascade	6	151	0.0105809	0.963048	0.963048	0.0163522
Toll-like Receptor Cascades	8	188	0.0131736	0.963391	0.963391	0.0161975
Protein localization	7	170	0.0119123	0.96372	0.96372	0.0160492
Class I MHC mediated antigen processing & presentation	25	474	0.0332142	0.963828	0.963828	0.0160007
Ion transport by P-type ATPases	2	71	0.00497512	0.965206	0.965206	0.0153799
Disorders of transmembrane transporters	13	278	0.0194801	0.966297	0.966297	0.0148892
IGF1R signaling cascade	2	72	0.0050452	0.967277	0.967277	0.014449
Mitochondrial tRNA aminoacylation	1	47	0.00329339	0.967531	0.967531	0.0143349
Metabolism of folate and pterines	1	47	0.00329339	0.967531	0.967531	0.0143349
RAC1 GTPase cycle	8	191	0.0133838	0.967543	0.967543	0.0143299
Signaling by Type 1 Insulin-like Growth Factor 1 Receptor (IGF1R)	2	73	0.00511527	0.969229	0.969229	0.0135734
Chondroitin sulfate/dermatan sulfate metabolism	2	73	0.00511527	0.969229	0.969229	0.0135734
Ca-dependent events	1	48	0.00336346	0.969819	0.969819	0.0133095
Constitutive Signaling by Aberrant PI3K in Cancer	3	96	0.00672693	0.970501	0.970501	0.0130042
FCERI mediated NF-kB activation	7	175	0.0122626	0.970619	0.970619	0.0129514
Costimulation by the CD28 family	3	97	0.006797	0.972088	0.972088	0.0122946
Signaling by VEGF	5	138	0.00966996	0.972162	0.972162	0.0122613
Stimuli-sensing channels	4	119	0.00833859	0.973568	0.973568	0.0116337
Activation of GABAB receptors	1	50	0.00350361	0.973921	0.973921	0.0114761
GABA B receptor activation	1	50	0.00350361	0.973921	0.973921	0.0114761
Metabolism of porphyrins	2	76	0.00532549	0.974435	0.974435	0.0112469
TBC/RABGAPs	1	51	0.00357368	0.975759	0.975759	0.0106575
COPII-mediated vesicle transport	2	77	0.00539556	0.975973	0.975973	0.010562
Neurotransmitter release cycle	3	100	0.00700722	0.976377	0.976377	0.0103825
Pyruvate metabolism and Citric Acid (TCA) cycle	3	100	0.00700722	0.976377	0.976377	0.0103825
Post-translational protein modification	97	1598	0.111975	0.97678	0.97678	0.0102031
Diseases associated with O-glycosylation of proteins	2	78	0.00546563	0.977422	0.977422	0.00991802
DAG and IP3 signaling	1	53	0.00371383	0.979055	0.979055	0.00919298
SLC transporter disorders	7	183	0.0128232	0.979201	0.979201	0.00912807
trans-Golgi Network Vesicle Budding	2	80	0.00560577	0.980069	0.980069	0.00874333
Integration of energy metabolism	5	145	0.0101605	0.980131	0.980131	0.00871599
Fatty acyl-CoA biosynthesis	2	81	0.00567585	0.981277	0.981277	0.00820825
Diseases of carbohydrate metabolism	2	81	0.00567585	0.981277	0.981277	0.00820825
Carboxyterminal post-translational modifications of tubulin	1	55	0.00385397	0.981903	0.981903	0.0079314
EPH-ephrin mediated repulsion of cells	1	55	0.00385397	0.981903	0.981903	0.0079314
Synthesis of PC	1	55	0.00385397	0.981903	0.981903	0.0079314
Mitochondrial Fatty Acid Beta-Oxidation	3	105	0.00735758	0.982166	0.982166	0.0078152
Peptide hormone metabolism	4	127	0.00889917	0.982529	0.982529	0.00765445
PI5P, PP2A and IER3 Regulate PI3K/AKT Signaling	4	129	0.00903931	0.984271	0.984271	0.00688524
The canonical retinoid cycle in rods (twilight vision)	1	57	0.00399411	0.984364	0.984364	0.00684418
Asparagine N-linked glycosylation	20	421	0.0295004	0.984487	0.984487	0.00679
Nicotinate metabolism	2	84	0.00588606	0.984491	0.984491	0.00678835
PI3K Cascade	1	58	0.00406419	0.985466	0.985466	0.00635817
Signaling by FGFR2 in disease	1	58	0.00406419	0.985466	0.985466	0.00635817
Netrin-1 signaling	1	59	0.00413426	0.986491	0.986491	0.00590688
Generation of second messenger molecules	1	59	0.00413426	0.986491	0.986491	0.00590688
Heparan sulfate/heparin (HS-GAG) metabolism	2	88	0.00616635	0.987953	0.987953	0.00526383
Infection with Mycobacterium tuberculosis	4	135	0.00945974	0.988561	0.988561	0.00499655
Fc epsilon receptor (FCERI) signaling	9	235	0.016467	0.988667	0.988667	0.00495004
Negative regulation of the PI3K/AKT network	4	137	0.00959989	0.989724	0.989724	0.00448582
ADORA2B mediated anti-inflammatory cytokines production	5	159	0.0111415	0.990095	0.990095	0.00432297
Cardiac conduction	4	138	0.00966996	0.990263	0.990263	0.00424964
IRS-mediated signalling	1	65	0.00455469	0.991289	0.991289	0.00379984
RAB GEFs exchange GTP for GDP on RABs	2	94	0.00658678	0.991777	0.991777	0.00358592
PLC beta mediated events	1	67	0.00469484	0.992474	0.992474	0.00328077
RAB geranylgeranylation	1	68	0.00476491	0.993005	0.993005	0.00304853
Glutathione conjugation	1	68	0.00476491	0.993005	0.993005	0.00304853
Interferon Signaling	17	394	0.0276084	0.993255	0.993255	0.00293932
Nucleotide salvage	1	69	0.00483498	0.993499	0.993499	0.00283277
Amino acid transport across the plasma membrane	1	69	0.00483498	0.993499	0.993499	0.00283277
Plasma lipoprotein assembly, remodeling, and clearance	2	98	0.00686707	0.993637	0.993637	0.00277215
Signaling by the B Cell Receptor (BCR)	6	189	0.0132436	0.993751	0.993751	0.00272226
tRNA modification in the nucleus and cytosol	1	70	0.00490505	0.993957	0.993957	0.00263231
Visual phototransduction	5	169	0.0118422	0.994071	0.994071	0.00258257
Interleukin-4 and Interleukin-13 signaling	7	211	0.0147852	0.994208	0.994208	0.00252295
Activation of gene expression by SREBF (SREBP)	1	71	0.00497512	0.994384	0.994384	0.00244607
Neurotransmitter receptors and postsynaptic signal transmission	8	232	0.0162567	0.994472	0.994472	0.00240741
Insulin receptor signalling cascade	1	72	0.0050452	0.99478	0.99478	0.00227302
Metabolism of steroid hormones	1	72	0.0050452	0.99478	0.99478	0.00227302
G alpha (s) signalling events	5	172	0.0120524	0.994929	0.994929	0.00220793
Platelet activation, signaling and aggregation	11	293	0.0205311	0.995145	0.995145	0.00211362
G-protein mediated events	1	73	0.00511527	0.995148	0.995148	0.00211224
Signaling by Retinoic Acid	1	73	0.00511527	0.995148	0.995148	0.00211224
Rab regulation of trafficking	3	131	0.00917945	0.996074	0.996074	0.00170856
Potassium Channels	2	107	0.00749772	0.996444	0.996444	0.00154701
Ion channel transport	6	206	0.0144349	0.997341	0.997341	0.00115621
Endosomal/Vacuolar pathway	1	82	0.00574592	0.997489	0.997489	0.00109172
Interferon alpha/beta signaling	5	186	0.0130334	0.997587	0.997587	0.00104932
Opioid Signalling	2	113	0.00791816	0.997596	0.997596	0.00104544
Binding and Uptake of Ligands by Scavenger Receptors	4	168	0.0117721	0.998164	0.998164	0.000798272
Regulation of cholesterol biosynthesis by SREBP (SREBF)	1	87	0.00609628	0.998259	0.998259	0.000756672
Peroxisomal lipid metabolism	1	90	0.0063065	0.998603	0.998603	0.000607274
Inositol phosphate metabolism	1	90	0.0063065	0.998603	0.998603	0.000607274
FCERI mediated MAPK activation	2	124	0.00868895	0.998834	0.998834	0.000506749
Mitochondrial translation termination	1	94	0.00658678	0.998958	0.998958	0.000452909
Mitochondrial translation elongation	1	94	0.00658678	0.998958	0.998958	0.000452909
Mitochondrial translation initiation	1	96	0.00672693	0.9991	0.9991	0.000391128
Signaling by Insulin receptor	1	97	0.006797	0.999163	0.999163	0.000363472
Regulation of actin dynamics for phagocytic cup formation	3	158	0.0110714	0.99924	0.99924	0.000330058
Cytokine Signaling in Immune system	54	1092	0.0765188	0.9993	0.9993	0.000303995
O-linked glycosylation	2	133	0.0093196	0.999358	0.999358	0.000278797
Metabolism of nucleotides	7	256	0.0179385	0.999382	0.999382	0.000268572
Mitochondrial translation	1	102	0.00714736	0.99942	0.99942	0.00025189
Antigen Presentation: Folding, assembly and peptide loading of class I MHC	1	103	0.00721743	0.999461	0.999461	0.000234075
Transmission across Chemical Synapses	11	343	0.0240348	0.999468	0.999468	0.000231284
Neutrophil degranulation	18	480	0.0336346	0.999489	0.999489	0.000221769
Transport of vitamins, nucleosides, and related molecules	1	108	0.00756779	0.999627	0.999627	0.000162199
Neuronal System	18	489	0.0342653	0.999646	0.999646	0.000153779
Adaptive Immune System	47	1005	0.0704225	0.9997	0.9997	0.000130099
Synthesis of bile acids and bile salts	1	113	0.00791816	0.999741	0.999741	0.000112382
Diseases of glycosylation	4	202	0.0141546	0.999749	0.999749	0.000108877
Post-translational modification: synthesis of GPI-anchored proteins	1	115	0.0080583	0.999777	0.999777	9.70377e-05
Hemostasis	34	803	0.056268	0.999851	0.999851	6.45677e-05
Parasite infection	2	157	0.0110013	0.999872	0.999872	5.55976e-05
Leishmania phagocytosis	2	157	0.0110013	0.999872	0.999872	5.55976e-05
FCGR3A-mediated phagocytosis	2	157	0.0110013	0.999872	0.999872	5.55976e-05
Antimicrobial peptides	1	123	0.00861888	0.999876	0.999876	5.39314e-05
Biosynthesis of the N-glycan precursor (dolichol lipid-linked oligosaccharide, LLO) and transfer to a nascent protein	2	159	0.0111415	0.999888	0.999888	4.85541e-05
Bile acid and bile salt metabolism	1	125	0.00875902	0.999893	0.999893	4.65635e-05
Transport of bile salts and organic acids, metal ions and amine compounds	2	163	0.0114218	0.999915	0.999915	3.7014e-05
Fcgamma receptor (FCGR) dependent phagocytosis	3	193	0.0135239	0.999916	0.999916	3.63414e-05
Glycerophospholipid biosynthesis	4	222	0.015556	0.999925	0.999925	3.24669e-05
Synthesis of substrates in N-glycan biosythesis	1	131	0.00917945	0.999931	0.999931	2.99645e-05
Arachidonic acid metabolism	2	168	0.0117721	0.999939	0.999939	2.6344e-05
Formation of the cornified envelope	1	138	0.00966996	0.999959	0.999959	1.79128e-05
FCGR3A-mediated IL10 synthesis	1	141	0.00988018	0.999967	0.999967	1.43671e-05
Glycosaminoglycan metabolism	2	182	0.0127531	0.999977	0.999977	1.01198e-05
Anti-inflammatory response favouring Leishmania parasite infection	6	297	0.0208114	0.999982	0.999982	7.76639e-06
Leishmania parasite growth and survival	6	297	0.0208114	0.999982	0.999982	7.76639e-06
Interferon gamma signaling	4	250	0.017518	0.999987	0.999987	5.74252e-06
Cell surface interactions at the vascular wall	4	257	0.0180085	0.999991	0.999991	3.70132e-06
Transport of inorganic cations/anions and amino acids/oligopeptides	1	165	0.0115619	0.999994	0.999994	2.45634e-06
Peptide ligand-binding receptors	2	203	0.0142247	0.999995	0.999995	2.38232e-06
Leishmania infection	9	406	0.0284493	0.999998	0.999998	9.77621e-07
Metabolism of carbohydrates	11	456	0.0319529	0.999998	0.999998	7.98694e-07
Metabolism of water-soluble vitamins and cofactors	3	256	0.0179385	0.999999	0.999999	5.89789e-07
Phase I - Functionalization of compounds	4	299	0.0209516	0.999999	0.999999	2.5404e-07
G alpha (q) signalling events	3	284	0.0199005	1	1	9.02844e-08
Phospholipid metabolism	4	315	0.0220727	1	1	8.99764e-08
Immunoregulatory interactions between a Lymphoid and a non-Lymphoid cell	4	316	0.0221428	1	1	8.43007e-08
Fatty acid metabolism	8	431	0.0302011	1	1	5.76388e-08
Metabolism of vitamins and cofactors	6	379	0.0265574	1	1	5.65356e-08
Metabolism of steroids	4	328	0.0229837	1	1	3.84748e-08
Sensory Perception	10	493	0.0345456	1	1	2.80912e-08
Keratinization	1	226	0.0158363	1	1	2.72112e-08
Diseases of metabolism	6	409	0.0286595	1	1	8.72078e-09
Phase II - Conjugation of compounds	1	263	0.018429	1	1	1.75573e-09
G alpha (i) signalling events	5	426	0.0298507	1	1	4.5228e-10
SLC-mediated transmembrane transport	4	416	0.02915	1	1	1.08196e-10
Transport of small molecules	25	961	0.0673394	1	1	2.77683e-11
GPCR ligand binding	8	606	0.0424637	1	1	1.15174e-12
Class A/1 (Rhodopsin-like receptors)	2	412	0.0288697	1	1	8.37326e-13
Immune System	112	2684	0.188074	1	1	2.40166e-13
Innate Immune System	38	1334	0.0934763	1	1	1.70252e-13
Biological oxidations	5	549	0.0384696	1	1	1.1813e-13
GPCR downstream signalling	12	786	0.0550767	1	1	1.38863e-14
Signaling by GPCR	15	865	0.0606124	1	1	1.30184e-14
Metabolism	162	3646	0.255483	1	1	1.73579e-15
Metabolism of lipids	22	1444	0.101184	1	1	0
