# Supplementary material for: Decoding the activated stem cell phenotype of the neonatally maturing pituitary
Source: eLife. 2022 Jun 14;11:e75742. doi: 10.7554/eLife.75742 (PMC9333987; doi:10.7554/eLife.75742)
Supplement: Figure 4—figure supplement 2—source data 1. — (A) DEG analysis in Prolif Pou1f1+ cells + Pou1f1 Lin Prog of damaged versus control neonatal AP. The columns represent: gene names (Gene), p values (p_val), average log fold change expression (avg_logFC; positive values indicate upregulation and negative values downregulation in damaged), percentage of cells expressing the indicated gene in damaged (pct.1) and in the control (pct.2), and the FDR adjusted p value (p_val_adj). (B) Gene Ontology (GO) analysis of genes upregulated in neonatal damaged versus control Prolif Pou1f1+ cells + Pou1f1 Lin Prog. Analyses were performed using Reactome overrepresentation analysis. Pathway name, number of mapped identifiers that match the pathway (#Entities found), total number of identifiers in the pathway (#Entities total), total entities in the pathway/total number of entities for the entire species (Entities ratio), p value, FDR, and −log10(FDR) are shown in the columns. Associated with Figure 4—figure supplement 2A. [file elife-75742-fig4-figsupp2-data1.xlsx]

## Sheet: A
DEGs damaged versus control (Prolif Pou1f1+ cells + Pou1f1 Lin Prog; neonatal)
Gene	p_val	avg_logFC	pct.1	pct.2	p_val_adj
Xist	8.27408e-70	1.62666	0.373	0.001	1.83345e-65
Gm47283	1.31622e-38	1.55929	0.909	0.759	2.9166e-34
Gm42418	2.84418e-33	-0.559134	0.997	0.999	6.30242e-29
Gh	1.01201e-30	-0.564396	0.813	0.938	2.24252e-26
Eif5	4.65626e-30	0.364465	0.963	0.951	1.03178e-25
Oaz1	1.99073e-26	0.355309	0.99	0.994	4.41126e-22
Ctsl	6.30795e-25	0.368163	0.901	0.831	1.39778e-20
mt-Nd3	1.188e-23	-0.275081	0.883	0.961	2.6325e-19
Eif5a	1.27844e-22	0.26523	0.965	0.97	2.83289e-18
Eif1b	2.21035e-22	0.357978	0.914	0.895	4.89792e-18
Vgf	5.5267e-21	0.465331	0.525	0.324	1.22466e-16
Ubc	1.07192e-19	0.530824	0.97	0.971	2.37527e-15
Uchl1	1.50075e-19	-0.271434	0.816	0.941	3.32551e-15
BC031181	3.20488e-19	0.305001	0.885	0.859	7.1017e-15
Tshb	3.60123e-19	0.904332	0.525	0.313	7.97997e-15
Bcl10	4.01644e-19	0.329718	0.712	0.58	8.90004e-15
Ghrhr	1.14521e-18	-0.261217	0.466	0.702	2.53768e-14
Ccnl1	1.23495e-17	0.524272	0.882	0.842	2.73653e-13
Tsc22d1	1.26574e-17	0.374342	0.895	0.864	2.80475e-13
Gadd45b	1.52581e-17	0.895856	0.6	0.44	3.38105e-13
Nfkbia	2.24838e-17	0.526774	0.794	0.742	4.98219e-13
Calm1	3.12716e-17	0.269864	0.991	0.993	6.92947e-13
Zcrb1	3.95039e-17	0.290573	0.912	0.907	8.75368e-13
Tubb5	1.82987e-16	-0.337538	0.953	0.986	4.05481e-12
Odc1	1.43474e-15	0.297615	0.898	0.877	3.17924e-11
Snhg12	2.15406e-15	0.893407	0.81	0.75	4.77319e-11
Dynll1	6.77458e-15	0.350772	0.944	0.957	1.50118e-10
Rabggtb	9.03295e-15	0.50409	0.801	0.743	2.00161e-10
Ube2b	1.28555e-14	0.282585	0.95	0.933	2.84865e-10
Srsf11	1.50121e-14	0.340922	0.937	0.924	3.32653e-10
Dbp	3.5293e-14	0.468628	0.378	0.231	7.82057e-10
Ptp4a1	4.4793e-14	0.328509	0.847	0.788	9.92569e-10
Tra2b	4.59575e-14	0.452759	0.951	0.944	1.01837e-09
H3f3b	6.64508e-14	0.559341	0.999	0.999	1.47248e-09
Nop58	7.88174e-14	0.491294	0.911	0.884	1.74652e-09
Hbegf	1.10258e-13	0.340872	0.367	0.208	2.44322e-09
Prpf38b	1.15838e-13	0.315146	0.801	0.732	2.56686e-09
Ifrd1	1.44445e-13	0.452805	0.847	0.811	3.20075e-09
5430416N02Rik	1.70796e-13	0.488416	0.642	0.545	3.78466e-09
Taf1d	2.29619e-13	0.701545	0.895	0.857	5.08813e-09
Tuba1b	4.87105e-13	-0.283615	0.878	0.951	1.07938e-08
Smndc1	9.98669e-13	0.337195	0.757	0.673	2.21295e-08
Chgb	1.69717e-12	0.435439	0.955	0.956	3.76076e-08
Ddx39b	2.16621e-12	0.282358	0.938	0.934	4.80011e-08
Ier2	3.04274e-12	0.369562	0.76	0.702	6.7424e-08
Kin	3.20902e-12	0.406397	0.719	0.634	7.11086e-08
1810032O08Rik	3.31248e-12	0.36868	0.429	0.297	7.34012e-08
Atf4	3.86422e-12	0.406767	0.929	0.901	8.56272e-08
Son	5.01451e-12	0.307484	0.96	0.96	1.11116e-07
Syf2	2.64651e-11	0.409732	0.797	0.74	5.86441e-07
Alkbh5	3.51422e-11	0.257512	0.771	0.706	7.78715e-07
Yy1	7.11933e-11	0.288931	0.8	0.74	1.57757e-06
Nop56	7.22778e-11	0.837485	0.862	0.855	1.6016e-06
Klf10	8.42701e-11	0.301596	0.486	0.354	1.86734e-06
Brd2	9.41562e-11	0.380491	0.871	0.819	2.08641e-06
Nr1d1	9.58277e-11	0.691808	0.427	0.304	2.12345e-06
Rsrc2	1.00659e-10	0.501626	0.921	0.908	2.2305e-06
Comt	1.3061e-10	1.21925	0.722	0.67	2.89419e-06
Mif	1.67047e-10	0.287786	0.947	0.953	3.7016e-06
Mdk	2.52219e-10	0.412196	0.545	0.418	5.58893e-06
Cpm	4.49316e-10	0.405631	0.306	0.188	9.9564e-06
Eif3a	7.2454e-10	0.302127	0.941	0.938	1.60551e-05
Id2	9.84175e-10	0.739324	0.432	0.308	2.18083e-05
Topors	1.04471e-09	0.364176	0.722	0.666	2.31497e-05
Hist1h2bc	1.21189e-09	0.296676	0.922	0.887	2.68542e-05
1600020E01Rik	1.22369e-09	0.329921	0.463	0.336	2.71157e-05
Tac1	1.37313e-09	0.492616	0.319	0.194	3.04272e-05
Nefm	1.87063e-09	0.466528	0.252	0.138	4.14513e-05
Pum1	2.06287e-09	0.301733	0.823	0.793	4.57111e-05
Chchd7	2.48567e-09	0.299067	0.79	0.763	5.50799e-05
Ppp1r15a	2.52138e-09	0.50847	0.601	0.494	5.58713e-05
Cited2	2.72773e-09	0.51384	0.554	0.442	6.04439e-05
Gtf2h1	3.09977e-09	0.325869	0.541	0.438	6.86879e-05
Gtpbp4	4.10089e-09	0.844555	0.656	0.564	9.08717e-05
Nsrp1	6.54329e-09	0.26013	0.702	0.62	0.000144993
Hist1h4i	6.70184e-09	0.404638	0.606	0.506	0.000148506
Srsf10	6.94289e-09	0.268466	0.919	0.898	0.000153848
Tdp2	7.80381e-09	0.286122	0.696	0.615	0.000172925
Clk1	9.54564e-09	0.345899	0.872	0.828	0.000211522
Esf1	1.1937e-08	0.352265	0.753	0.689	0.000264511
Nr1d2	1.5061e-08	0.362046	0.534	0.425	0.000333737
Gadd45g	1.62239e-08	1.00778	0.437	0.339	0.000359506
Malat1	1.64555e-08	0.280341	0.965	0.967	0.000364638
Nemf	3.00797e-08	0.257612	0.719	0.671	0.000666537
Map1lc3b	3.0223e-08	0.36911	0.885	0.865	0.000669711
Clk4	3.25391e-08	0.338834	0.709	0.669	0.000721034
U2af1	3.56926e-08	0.275988	0.917	0.905	0.000790913
Zfp36l2	3.74348e-08	0.42977	0.652	0.581	0.000829518
Lrr1	4.98522e-08	0.320306	0.322	0.215	0.00110467
Gem	6.38648e-08	0.325584	0.517	0.418	0.00141518
Gm13373	6.78077e-08	0.275398	0.652	0.605	0.00150255
Tubb2a	1.36243e-07	0.362172	0.669	0.59	0.00301901
Hist1h4h	1.62499e-07	0.689672	0.414	0.317	0.00360082
Ythdc1	1.93023e-07	0.254878	0.872	0.841	0.0042772
Hnrnph1	2.10319e-07	0.264455	0.922	0.904	0.00466046
Bex1	2.84002e-07	0.275118	0.951	0.968	0.0062932
Mdm2	3.14176e-07	0.314316	0.586	0.527	0.00696182
Polr2l	5.07968e-07	0.549688	0.43	0.319	0.0112561
Ckb	5.3973e-07	0.329467	0.764	0.723	0.0119599
Oser1	6.17417e-07	0.279979	0.591	0.506	0.0136813
Wsb1	6.25158e-07	0.332463	0.584	0.527	0.0138529
Id1	7.244e-07	0.294319	0.311	0.215	0.016052
Polr2h	8.00386e-07	0.288729	0.596	0.539	0.0177358
Mrpl9	8.37877e-07	1.00625	0.573	0.489	0.0185665
Gm49359	9.64502e-07	0.520271	0.281	0.187	0.0213724
Vezf1	1.29267e-06	0.256384	0.796	0.779	0.0286442
Srsf7	1.36739e-06	0.466169	0.901	0.882	0.0302999
Hirip3	1.60853e-06	0.583757	0.717	0.66	0.0356435
Tfrc	2.53412e-06	0.251722	0.555	0.462	0.0561536
Prl	2.94473e-06	0.652725	0.292	0.189	0.0652522
Snhg9	2.99979e-06	0.376524	0.673	0.611	0.0664724
Tob1	3.14657e-06	0.512823	0.76	0.722	0.0697248
Pcf11	4.00936e-06	0.278209	0.722	0.69	0.0888434
Fam76b	6.29145e-06	0.283879	0.646	0.603	0.139412
Srsf2	1.07978e-05	0.584683	0.938	0.956	0.239268
Med7	1.11647e-05	0.260453	0.519	0.461	0.247399
Jun	1.90231e-05	0.429033	0.706	0.69	0.421533
Ankrd37	2.5072e-05	0.317059	0.443	0.359	0.555569
Gnmt	2.71498e-05	0.369118	0.471	0.42	0.601613
Dennd5b	2.74249e-05	0.799999	0.424	0.352	0.607709
Slbp	2.91797e-05	0.689181	0.816	0.792	0.646593
Ankrd26	4.99274e-05	0.272317	0.476	0.389	1
Pim3	7.19998e-05	0.281931	0.683	0.653	1
Apoe	9.42263e-05	-0.263525	0.553	0.611	1
Plk2	9.45529e-05	0.255358	0.414	0.344	1
Scg2	0.00010122	0.268003	0.921	0.907	1
Smc4	0.00010313	0.361506	0.842	0.815	1
Eif4a2	0.000164207	0.488748	0.922	0.94	1
Hist1h3c	0.000169933	0.332969	0.334	0.263	1
Exosc2	0.000187521	0.555084	0.488	0.436	1
Ttyh1	0.000204952	0.318846	0.619	0.634	1
Hist1h1b	0.000288103	-0.357461	0.283	0.36	1
AC160336.1	0.000323164	3.04705	0.862	0.869	1
Ier5	0.000402974	0.423446	0.505	0.449	1
Limk2	0.000559311	0.491368	0.337	0.273	1
Arrdc3	0.000678208	0.323988	0.452	0.393	1
Rfc4	0.00138421	0.260704	0.655	0.626	1
Orc6	0.00139142	0.376333	0.711	0.704	1
Cir1	0.00194657	0.292134	0.706	0.707	1
Ier5l	0.00260982	0.49664	0.309	0.258	1
Hspa1a	0.00414008	-0.400407	0.384	0.443	1
Hist1h4d	0.00561548	0.838829	0.479	0.458	1
Txnip	0.00713282	0.883011	0.656	0.657	1
Terf2ip	0.00919656	0.299038	0.442	0.385	1
Cep57	0.0116681	0.333744	0.642	0.663	1
Cdkn1a	0.0201465	0.269195	0.616	0.627	1
Crlf1	0.0274089	0.380978	0.535	0.539	1
P2rx4	0.0452657	0.263722	0.291	0.253	1
Dlg1	0.172464	0.38348	0.4	0.383	1
Mcm7	0.220278	0.280604	0.709	0.745	1
Yae1d1	0.263452	0.517355	0.547	0.558	1
Haus8	0.309543	0.451662	0.4	0.386	1
2810474O19Rik	0.550516	0.643369	0.416	0.438	1
Hist1h2ap	0.553198	-0.315102	0.341	0.313	1
Mt1	0.602024	0.341838	0.869	0.898	1
Gmcl1	0.724721	0.375646	0.347	0.364	1

## Sheet: B
GO analysis of genes upregulated in damaged versus control Prolif Pou1f1+ cells + Pou1f1 Lin Prog (neonatal)
Pathway name	#Entities found	#Entities total	Entities ratio	Entities pValue	Entities FDR	-log10(FDR)
Processing of Capped Intron-Containing Pre-mRNA	16	256	0.0179385	1.11726e-07	7.45717e-05	4.12743
mRNA Splicing	14	196	0.0137341	1.47667e-07	7.45717e-05	4.12743
mRNA Splicing - Major Pathway	13	185	0.0129634	5.00306e-07	0.000168603	3.77313
RNA Polymerase I Promoter Escape	7	64	0.00448462	1.49417e-05	0.00376531	2.4242
RNA Polymerase II Transcription Termination	7	67	0.00469484	1.99792e-05	0.00403579	2.39407
Inhibition of DNA recombination at telomere	6	48	0.00336346	2.95937e-05	0.00445298	2.35135
Response of EIF2AK1 (HRI) to heme deficiency	5	29	0.00203209	3.09235e-05	0.00445298	2.35135
Cell Cycle Checkpoints	13	280	0.0196202	4.09274e-05	0.00515685	2.28762
Transcriptional activation of p53 responsive genes	3	6	0.000420433	5.87228e-05	0.00537025	2.27001
Transcriptional activation of cell cycle inhibitor p21	3	6	0.000420433	5.87228e-05	0.00537025	2.27001
NoRC negatively regulates rRNA expression	7	80	0.00560577	6.06782e-05	0.00537025	2.27001
NGF-stimulated transcription	6	56	0.00392404	6.89486e-05	0.00537025	2.27001
Telomere Maintenance	8	111	0.00777801	6.97435e-05	0.00537025	2.27001
Cell Cycle	22	734	0.051433	8.18652e-05	0.00555665	2.25519
mRNA 3'-end processing	6	58	0.00406419	8.34418e-05	0.00555665	2.25519
Activation of anterior HOX genes in hindbrain development during early embryogenesis	8	116	0.00812837	9.43198e-05	0.00555665	2.25519
Activation of HOX genes during differentiation	8	116	0.00812837	9.43198e-05	0.00555665	2.25519
RNA Polymerase I Promoter Clearance	7	87	0.00609628	0.000101759	0.00555665	2.25519
RNA Polymerase I Transcription	7	89	0.00623642	0.000116941	0.00555665	2.25519
Negative epigenetic regulation of rRNA expression	7	89	0.00623642	0.000116941	0.00555665	2.25519
B-WICH complex positively regulates rRNA expression	6	62	0.00434447	0.000119677	0.00555665	2.25519
Activation of ATR in response to replication stress	5	39	0.00273281	0.000123481	0.00555665	2.25519
Gap-filling DNA repair synthesis and ligation in TC-NER	6	66	0.00462476	0.000167411	0.00719868	2.14275
Cellular Senescence	10	200	0.0140144	0.000178673	0.00750426	2.12469
Dual incision in TC-NER	6	68	0.00476491	0.00019634	0.00776196	2.11003
Metabolism of RNA	22	783	0.0548665	0.000204262	0.00776196	2.11003
Assembly of the pre-replicative complex	7	102	0.00714736	0.000266654	0.00986621	2.00585
Cellular responses to stimuli	25	970	0.06797	0.000274262	0.00987342	2.00553
DNA Replication	9	174	0.0121926	0.000294528	0.00999766	2.0001
Chromosome Maintenance	8	138	0.00966996	0.00030296	0.00999766	2.0001
Positive epigenetic regulation of rRNA expression	6	80	0.00560577	0.000462556	0.0143392	1.84347
Nuclear Events (kinase and transcription factor activation)	6	80	0.00560577	0.000462556	0.0143392	1.84347
RNA Polymerase II Transcription	36	1694	0.118702	0.000498271	0.0149481	1.82541
Recognition of DNA damage by PCNA-containing replication complex	4	30	0.00210217	0.000519094	0.0150537	1.82236
G2/M Checkpoints	8	154	0.0107911	0.000620028	0.0172119	1.76417
Transcription-Coupled Nucleotide Excision Repair (TC-NER)	6	85	0.00595613	0.000633554	0.0172119	1.76417
mRNA Splicing - Minor Pathway	5	56	0.00392404	0.000639765	0.0172119	1.76417
Nucleotide Excision Repair	7	119	0.00833859	0.000661998	0.0172119	1.76417
DNA Replication Pre-Initiation	7	120	0.00840866	0.000694969	0.0173742	1.76009
RNA Polymerase I Transcription Termination	4	33	0.00231238	0.000739063	0.0184766	1.73338
DNA Repair	13	380	0.0266274	0.000771466	0.0185152	1.73247
Transport of Mature Transcript to Cytoplasm	6	90	0.0063065	0.000849946	0.0197853	1.70366
Transcriptional Regulation by TP53	15	487	0.0341251	0.000891699	0.0197853	1.70366
Senescence-Associated Secretory Phenotype (SASP)	6	91	0.00637657	0.000899332	0.0197853	1.70366
RHO GTPases activate IQGAPs	4	36	0.0025226	0.00101792	0.0223942	1.64986
Cellular responses to stress	23	952	0.0667087	0.00117125	0.0245962	1.60913
TP53 Regulates Transcription of Cell Cycle Genes	5	65	0.00455469	0.00123618	0.0248081	1.60541
DNA strand elongation	4	38	0.00266274	0.00124041	0.0248081	1.60541
Gene expression (Transcription)	37	1855	0.129984	0.00133135	0.0266269	1.57468
Assembly of the ORC complex at the origin of replication	4	40	0.00280289	0.00149486	0.0284024	1.54664
Epigenetic regulation of gene expression	7	139	0.00974003	0.00160929	0.0290149	1.53738
Dual Incision in GG-NER	4	41	0.00287296	0.0016348	0.0290149	1.53738
Translesion synthesis by REV1	3	19	0.00133137	0.00166269	0.0290149	1.53738
Protein methylation	3	19	0.00133137	0.00166269	0.0290149	1.53738
p53-Dependent G1/S DNA damage checkpoint	5	70	0.00490505	0.00170676	0.0290149	1.53738
p53-Dependent G1 DNA Damage Response	5	70	0.00490505	0.00170676	0.0290149	1.53738
DNA Damage/Telomere Stress Induced Senescence	5	71	0.00497512	0.00181473	0.030757	1.51206
Translesion synthesis by POLI	3	20	0.00140144	0.00192231	0.030757	1.51206
TP53 Regulates Transcription of Genes Involved in G1 Cell Cycle Arrest	3	20	0.00140144	0.00192231	0.030757	1.51206
G1/S DNA Damage Checkpoints	5	72	0.0050452	0.00192761	0.0308418	1.51086
Translesion synthesis by POLK	3	21	0.00147152	0.00220586	0.0349347	1.45674
SIRT1 negatively regulates rRNA expression	4	45	0.00315325	0.00228596	0.0349347	1.45674
FOXO-mediated transcription	6	110	0.00770794	0.00232898	0.0349347	1.45674
Cell Cycle, Mitotic	16	596	0.041763	0.0024523	0.0367845	1.43434
TFAP2 (AP-2) family regulates transcription of cell cycle factors	2	6	0.000420433	0.00247887	0.037183	1.42966
Aggrephagy	4	47	0.00329339	0.00267032	0.0388493	1.41062
Oxidative Stress Induced Senescence	6	114	0.00798823	0.00277495	0.0388493	1.41062
Estrogen-dependent gene expression	7	154	0.0107911	0.00284103	0.0397744	1.4004
Transport of Mature mRNA derived from an Intron-Containing Transcript	5	81	0.00567585	0.00318696	0.0432452	1.36406
Transcriptional regulation by small RNAs	5	81	0.00567585	0.00318696	0.0432452	1.36406
Translesion Synthesis by POLH	3	24	0.00168173	0.0032072	0.0432452	1.36406
RNA Polymerase I Transcription Initiation	4	50	0.00350361	0.00332655	0.0432452	1.36406
Transcriptional regulation by the AP-2 (TFAP2) family of transcription factors	4	52	0.00364375	0.0038203	0.0496639	1.30396
ESR-mediated signaling	9	257	0.0180085	0.00424764	0.0533773	1.27264
RUNX3 regulates CDKN1A transcription	2	8	0.000560577	0.00433789	0.0533773	1.27264
Gap-filling DNA repair synthesis and ligation in GG-NER	3	27	0.00189195	0.00444811	0.0533773	1.27264
FOXO-mediated transcription of cell cycle genes	3	27	0.00189195	0.00444811	0.0533773	1.27264
Condensation of Prophase Chromosomes	4	55	0.00385397	0.0046505	0.055806	1.25332
Selective autophagy	5	89	0.00623642	0.00472858	0.056743	1.24609
Amyloid fiber formation	5	89	0.00623642	0.00472858	0.056743	1.24609
FGFR2 alternative splicing	3	28	0.00196202	0.00491767	0.057933	1.23707
Formation of TC-NER Pre-Incision Complex	4	56	0.00392404	0.00495214	0.057933	1.23707
Processing of DNA double-strand break ends	5	90	0.0063065	0.00495282	0.057933	1.23707
DNA Damage Bypass	4	57	0.00399411	0.00526664	0.057933	1.23707
RNA Pol II CTD phosphorylation and interaction with CE during HIV infection	3	29	0.00203209	0.00541606	0.0595766	1.22492
RNA Pol II CTD phosphorylation and interaction with CE	3	29	0.00203209	0.00541606	0.0595766	1.22492
Global Genome Nucleotide Excision Repair (GG-NER)	5	92	0.00644664	0.00542376	0.0596614	1.22431
Synthesis of DNA	6	133	0.0093196	0.00581376	0.0639513	1.19415
Polymerase switching on the C-strand of the telomere	3	31	0.00217224	0.00650112	0.0654582	1.18404
S Phase	7	180	0.012613	0.00654582	0.0654582	1.18404
E3 ubiquitin ligases ubiquitinate target proteins	4	61	0.0042744	0.00665797	0.0665797	1.17666
Recruitment of NuMA to mitotic centrosomes	5	97	0.006797	0.00673821	0.0673821	1.17146
Base Excision Repair	5	100	0.00700722	0.00762596	0.0762596	1.11771
SUMOylation of immune response proteins	2	11	0.000770794	0.00800996	0.0800996	1.09637
Signaling by NTRK1 (TRKA)	6	143	0.0100203	0.00814965	0.0813214	1.08979
Packaging Of Telomere Ends	3	34	0.00238245	0.00835561	0.0813214	1.08979
Activation of AMPK downstream of NMDARs	3	34	0.00238245	0.00835561	0.0813214	1.08979
RNA Polymerase I Promoter Opening	3	34	0.00238245	0.00835561	0.0813214	1.08979
Termination of translesion DNA synthesis	3	35	0.00245253	0.00903572	0.0813214	1.08979
mRNA Capping	3	35	0.00245253	0.00903572	0.0813214	1.08979
Formation of the beta-catenin:TCF transactivating complex	4	67	0.00469484	0.00916965	0.0825269	1.0834
Circadian Clock	5	105	0.00735758	0.00928141	0.0835327	1.07814
Hypusine synthesis from eIF5A-lysine	2	12	0.000840866	0.00945793	0.0851214	1.06996
Unwinding of DNA	2	12	0.000840866	0.00945793	0.0851214	1.06996
DNA methylation	3	36	0.0025226	0.00974732	0.0877259	1.05687
Activation of the pre-replicative complex	3	36	0.0025226	0.00974732	0.0877259	1.05687
Formation of the HIV-1 Early Elongation Complex	3	37	0.00259267	0.0104907	0.0881054	1.055
Formation of the Early Elongation Complex	3	37	0.00259267	0.0104907	0.0881054	1.055
Activation of Ca-permeable Kainate Receptor	2	13	0.000910938	0.0110132	0.0881054	1.055
Pexophagy	2	13	0.000910938	0.0110132	0.0881054	1.055
Transcriptional regulation of granulopoiesis	4	71	0.00497512	0.0111465	0.0891724	1.04977
Generic Transcription Pathway	29	1555	0.108962	0.0116829	0.0934628	1.02936
Recognition and association of DNA glycosylase with site containing an affected purine	3	39	0.00273281	0.0120738	0.0965903	1.01507
Orc1 removal from chromatin	4	73	0.00511527	0.0122302	0.0978419	1.00948
Ionotropic activity of kainate receptors	2	14	0.00098101	0.0126729	0.101383	0.994033
Signaling by NOTCH	8	259	0.0181487	0.0138655	0.105107	0.978369
NF-kB is activated and signals survival	2	15	0.00105108	0.0144345	0.105107	0.978369
PERK regulates gene expression	3	42	0.00294303	0.0146923	0.105107	0.978369
Oncogene Induced Senescence	3	42	0.00294303	0.0146923	0.105107	0.978369
Recognition and association of DNA glycosylase with site containing an affected pyrimidine	3	42	0.00294303	0.0146923	0.105107	0.978369
Transcriptional regulation by RUNX3	5	118	0.00826852	0.0147093	0.105107	0.978369
G2/M Transition	7	212	0.0148553	0.0150152	0.105107	0.978369
Cytosolic sensors of pathogen-associated DNA	4	78	0.00546563	0.015228	0.105644	0.976157
Regulation of TP53 Degradation	3	43	0.0030131	0.0156308	0.105644	0.976157
FLT3 signaling in disease	3	43	0.0030131	0.0156308	0.105644	0.976157
Gene Silencing by RNA	5	120	0.00840866	0.0156992	0.105644	0.976157
Mitotic G2-G2/M phases	7	214	0.0149954	0.0157235	0.105644	0.976157
Signaling by NTRKs	6	166	0.011632	0.0159596	0.105644	0.976157
Leading Strand Synthesis	2	16	0.00112115	0.0162953	0.105644	0.976157
Polymerase switching	2	16	0.00112115	0.0162953	0.105644	0.976157
Metallothioneins bind metals	2	16	0.00112115	0.0162953	0.105644	0.976157
AKT phosphorylates targets in the cytosol	2	16	0.00112115	0.0162953	0.105644	0.976157
PRC2 methylates histones and DNA	3	44	0.00308318	0.0166025	0.105644	0.976157
DNA Double-Strand Break Repair	6	168	0.0117721	0.0168206	0.105644	0.976157
G2/M DNA damage checkpoint	4	81	0.00567585	0.0172304	0.105644	0.976157
Cleavage of the damaged purine	3	45	0.00315325	0.0176073	0.105644	0.976157
HDR through Homologous Recombination (HRR) or Single Strand Annealing (SSA)	5	124	0.00868895	0.0178105	0.106863	0.971172
RHO GTPase Effectors	9	326	0.0228435	0.0180428	0.108257	0.965544
Regulation of TP53 Expression and Degradation	3	46	0.00322332	0.0186453	0.111872	0.951279
Depurination	3	46	0.00322332	0.0186453	0.111872	0.951279
The role of GTSE1 in G2/M progression after G2 checkpoint	4	83	0.00581599	0.0186525	0.111915	0.951111
Protein ubiquitination	4	84	0.00588606	0.0193901	0.116341	0.934269
RNA Polymerase II Transcription Pre-Initiation And Promoter Opening	3	47	0.00329339	0.0197167	0.1183	0.927014
Translesion synthesis by Y family DNA polymerases bypasses lesions on DNA template	3	48	0.00336346	0.0208215	0.124929	0.903337
ERCC6 (CSB) and EHMT2 (G9a) positively regulate rRNA expression	3	48	0.00336346	0.0208215	0.124929	0.903337
Homology Directed Repair	5	130	0.00910938	0.0213166	0.127873	0.893222
Formation of HIV-1 elongation complex containing HIV-1 Tat	3	49	0.00343354	0.0219596	0.127873	0.893222
Activated PKN1 stimulates transcription of AR (androgen receptor) regulated genes KLK2 and KLK3	3	49	0.00343354	0.0219596	0.127873	0.893222
Assembly and cell surface presentation of NMDA receptors	3	49	0.00343354	0.0219596	0.127873	0.893222
p75NTR signals via NF-kB	2	19	0.00133137	0.0224468	0.127873	0.893222
Signaling by FGFR2	4	88	0.00616635	0.0225196	0.127873	0.893222
Formation of HIV elongation complex in the absence of HIV Tat	3	50	0.00350361	0.0231312	0.127873	0.893222
TP53 Regulates Transcription of DNA Repair Genes	4	89	0.00623642	0.0233472	0.127873	0.893222
Pre-NOTCH Transcription and Translation	4	89	0.00623642	0.0233472	0.127873	0.893222
Diseases of programmed cell death	4	90	0.0063065	0.0241932	0.127873	0.893222
Telomere C-strand (Lagging Strand) Synthesis	3	51	0.00357368	0.0243362	0.127873	0.893222
Cleavage of the damaged pyrimidine	3	51	0.00357368	0.0243362	0.127873	0.893222
Depyrimidination	3	51	0.00357368	0.0243362	0.127873	0.893222
Downstream signaling events of B Cell Receptor (BCR)	4	91	0.00637657	0.0250575	0.127873	0.893222
RNA Polymerase II HIV Promoter Escape	3	52	0.00364375	0.0255746	0.127873	0.893222
HIV Transcription Initiation	3	52	0.00364375	0.0255746	0.127873	0.893222
RNA Polymerase II Transcription Initiation	3	52	0.00364375	0.0255746	0.127873	0.893222
HIV Transcription Elongation	3	52	0.00364375	0.0255746	0.127873	0.893222
Tat-mediated elongation of the HIV-1 transcript	3	52	0.00364375	0.0255746	0.127873	0.893222
Defective pyroptosis	3	52	0.00364375	0.0255746	0.127873	0.893222
Meiosis	4	92	0.00644664	0.0259403	0.129701	0.887055
Regulation of PLK1 Activity at G2/M Transition	4	92	0.00644664	0.0259403	0.129701	0.887055
Switching of origins to a post-replicative state	4	93	0.00651671	0.0268416	0.134208	0.872222
SARS-CoV-1 Infection	4	93	0.00651671	0.0268416	0.134208	0.872222
RNA Polymerase II Promoter Escape	3	53	0.00371383	0.0268463	0.134231	0.872146
Response to metal ions	2	21	0.00147152	0.0269973	0.134987	0.869709
STAT5 activation downstream of FLT3 ITD mutants	2	21	0.00147152	0.0269973	0.134987	0.869709
Transcriptional regulation of testis differentiation	2	21	0.00147152	0.0269973	0.134987	0.869709
Regulation of TP53 Activity through Phosphorylation	4	95	0.00665686	0.0287	0.137798	0.860759
RNA Polymerase III Chain Elongation	2	22	0.00154159	0.0294002	0.137798	0.860759
Microtubule-dependent trafficking of connexons from Golgi to the plasma membrane	2	22	0.00154159	0.0294002	0.137798	0.860759
PINK1-PRKN Mediated Mitophagy	2	22	0.00154159	0.0294002	0.137798	0.860759
RNA Polymerase II Transcription Initiation And Promoter Clearance	3	55	0.00385397	0.0294896	0.137798	0.860759
Post NMDA receptor activation events	4	96	0.00672693	0.0296572	0.137798	0.860759
M Phase	10	416	0.02915	0.0301956	0.137798	0.860759
Intraflagellar transport	3	56	0.00392404	0.030861	0.137798	0.860759
PCNA-Dependent Long Patch Base Excision Repair	2	23	0.00161166	0.0318849	0.137798	0.860759
RNA Polymerase III Transcription Termination	2	23	0.00161166	0.0318849	0.137798	0.860759
Transport of connexons to the plasma membrane	2	23	0.00161166	0.0318849	0.137798	0.860759
NOTCH2 Activation and Transmission of Signal to the Nucleus	2	23	0.00161166	0.0318849	0.137798	0.860759
FOXO-mediated transcription of cell death genes	2	23	0.00161166	0.0318849	0.137798	0.860759
Regulation of TP53 Activity through Methylation	2	23	0.00161166	0.0318849	0.137798	0.860759
Nonhomologous End-Joining (NHEJ)	3	57	0.00399411	0.0322655	0.137798	0.860759
Meiotic recombination	3	58	0.00406419	0.033703	0.137798	0.860759
Signaling by FGFR2 IIIa TM	2	24	0.00168173	0.0344494	0.137798	0.860759
RHOBTB2 GTPase cycle	2	24	0.00168173	0.0344494	0.137798	0.860759
Macroautophagy	5	150	0.0105108	0.0361337	0.144535	0.840027
G1/S Transition	5	150	0.0105108	0.0361337	0.144535	0.840027
Post-chaperonin tubulin folding pathway	2	25	0.0017518	0.0370912	0.148365	0.828669
Signaling by Receptor Tyrosine Kinases	13	618	0.0433046	0.0372905	0.149162	0.826342
Meiotic synapsis	3	62	0.00434447	0.0397799	0.15912	0.798276
Lagging Strand Synthesis	2	26	0.00182188	0.0398083	0.159233	0.797966
RUNX1 regulates transcription of genes involved in differentiation of HSCs	4	106	0.00742765	0.0402666	0.161067	0.792995
Formation of RNA Pol II elongation complex	3	63	0.00441455	0.0413802	0.165521	0.781148
COPI-independent Golgi-to-ER retrograde traffic	3	63	0.00441455	0.0413802	0.165521	0.781148
Signaling by NOTCH3	3	63	0.00441455	0.0413802	0.165521	0.781148
Base-Excision Repair, AP Site Formation	3	63	0.00441455	0.0413802	0.165521	0.781148
Signaling by FGFR	4	107	0.00749772	0.0414319	0.165727	0.780606
Unblocking of NMDA receptors, glutamate binding and activation	2	27	0.00189195	0.0425984	0.165963	0.77999
Negative regulation of NMDA receptor-mediated neuronal transmission	2	27	0.00189195	0.0425984	0.165963	0.77999
Ras activation upon Ca2+ influx through NMDA receptor	2	27	0.00189195	0.0425984	0.165963	0.77999
Abortive elongation of HIV-1 transcript in the absence of Tat	2	27	0.00189195	0.0425984	0.165963	0.77999
RNA Polymerase III Transcription Initiation From Type 2 Promoter	2	27	0.00189195	0.0425984	0.165963	0.77999
Ribosomal scanning and start codon recognition	3	64	0.00448462	0.0430125	0.165963	0.77999
Mitotic Prometaphase	6	211	0.0147852	0.0436869	0.165963	0.77999
Post-translational protein phosphorylation	4	109	0.00763787	0.0438193	0.165963	0.77999
Post-translational protein modification	27	1598	0.111975	0.044838	0.165963	0.77999
Processing of Capped Intronless Pre-mRNA	2	28	0.00196202	0.0454595	0.165963	0.77999
RNA Polymerase III Transcription Initiation From Type 3 Promoter	2	28	0.00196202	0.0454595	0.165963	0.77999
RNA Polymerase III Transcription Initiation From Type 1 Promoter	2	28	0.00196202	0.0454595	0.165963	0.77999
Downregulation of TGF-beta receptor signaling	2	28	0.00196202	0.0454595	0.165963	0.77999
TP53 regulates transcription of additional cell cycle genes whose exact role in the p53 pathway remain uncertain	2	28	0.00196202	0.0454595	0.165963	0.77999
Signaling by Nuclear Receptors	9	387	0.0271179	0.0459739	0.165963	0.77999
RNA Polymerase II Transcription Elongation	3	66	0.00462476	0.0463728	0.165963	0.77999
HCMV Early Events	6	215	0.0150655	0.0470661	0.165963	0.77999
SARS-CoV-2 Infection	4	112	0.00784808	0.0475429	0.165963	0.77999
Recruitment and ATM-mediated phosphorylation of repair and signaling proteins at DNA double strand breaks	3	67	0.00469484	0.0481002	0.165963	0.77999
Prefoldin mediated transfer of substrate to CCT/TriC	2	29	0.00203209	0.0483894	0.165963	0.77999
Constitutive Signaling by AKT1 E17K in Cancer	2	29	0.00203209	0.0483894	0.165963	0.77999
Signaling by Rho GTPases	14	709	0.0496812	0.0486814	0.165963	0.77999
Activation of NMDA receptors and postsynaptic events	4	113	0.00791816	0.048822	0.165963	0.77999
Pre-NOTCH Expression and Processing	4	114	0.00798823	0.05012	0.165963	0.77999
Metabolism of proteins	35	2205	0.154509	0.0510756	0.165963	0.77999
Formation of tubulin folding intermediates by CCT/TriC	2	30	0.00210217	0.0513862	0.165963	0.77999
Signaling by FLT3 ITD and TKD mutants	2	30	0.00210217	0.0513862	0.165963	0.77999
Extension of Telomeres	3	69	0.00483498	0.0516489	0.165963	0.77999
Autophagy	5	166	0.011632	0.0516603	0.165963	0.77999
Signaling by TGFB family members	4	116	0.00812837	0.0527727	0.165963	0.77999
Long-term potentiation	2	31	0.00217224	0.0544478	0.165963	0.77999
Mitophagy	2	31	0.00217224	0.0544478	0.165963	0.77999
MicroRNA (miRNA) biogenesis	2	31	0.00217224	0.0544478	0.165963	0.77999
PIWI-interacting RNA (piRNA) biogenesis	2	31	0.00217224	0.0544478	0.165963	0.77999
Loss of proteins required for interphase microtubule organization from the centrosome	3	71	0.00497512	0.0553208	0.165963	0.77999
Loss of Nlp from mitotic centrosomes	3	71	0.00497512	0.0553208	0.165963	0.77999
Signaling by Rho GTPases, Miro GTPases and RHOBTB3	14	725	0.0508023	0.0565073	0.169522	0.770775
Stimuli-sensing channels	4	119	0.00833859	0.0568928	0.170678	0.767822
Activation of NF-kappaB in B cells	3	72	0.0050452	0.0572025	0.171607	0.765464
HDR through Homologous Recombination (HRR)	3	72	0.0050452	0.0572025	0.171607	0.765464
HSP90 chaperone cycle for steroid hormone receptors (SHR) in the presence of ligand	3	72	0.0050452	0.0572025	0.171607	0.765464
Resolution of AP sites via the multiple-nucleotide patch replacement pathway	2	32	0.00224231	0.0575722	0.172717	0.762666
Signaling by FLT3 fusion proteins	2	32	0.00224231	0.0575722	0.172717	0.762666
Signaling by EGFR in Cancer	2	32	0.00224231	0.0575722	0.172717	0.762666
CLEC7A (Dectin-1) signaling	4	120	0.00840866	0.0583036	0.174911	0.757183
TFAP2 (AP-2) family regulates transcription of other transcription factors	1	5	0.000350361	0.0584922	0.175477	0.755781
NR1D1 (REV-ERBA) represses gene expression	1	5	0.000350361	0.0584922	0.175477	0.755781
Tachykinin receptors bind tachykinins	1	5	0.000350361	0.0584922	0.175477	0.755781
Activation of BIM and translocation to mitochondria	1	5	0.000350361	0.0584922	0.175477	0.755781
Mitotic G1 phase and G1/S transition	5	173	0.0121225	0.0595105	0.178532	0.748285
Synthesis of active ubiquitin: roles of E1 and E2 enzymes	2	33	0.00231238	0.0607576	0.182273	0.739278
AURKA Activation by TPX2	3	74	0.00518534	0.0610559	0.183168	0.737151
Reproduction	4	123	0.00861888	0.0626477	0.187943	0.725974
DNA Double Strand Break Response	3	75	0.00525541	0.0630271	0.189081	0.723351
ATF4 activates genes in response to endoplasmic reticulum stress	2	34	0.00238245	0.064002	0.192006	0.716685
Activation of kainate receptors upon glutamate binding	2	34	0.00238245	0.064002	0.192006	0.716685
Regulation of TP53 Activity	5	178	0.0124728	0.0655128	0.195135	0.709665
Platelet calcium homeostasis	2	35	0.00245253	0.0673036	0.195135	0.709665
Regulation of Insulin-like Growth Factor (IGF) transport and uptake by Insulin-like Growth Factor Binding Proteins (IGFBPs)	4	127	0.00889917	0.0686981	0.195135	0.709665
RUNX1 regulates genes involved in megakaryocyte differentiation and platelet function	3	78	0.00546563	0.0691155	0.195135	0.709665
Downregulation of ERBB2 signaling	2	36	0.0025226	0.0706606	0.195135	0.709665
RHOBTB GTPase Cycle	2	36	0.0025226	0.0706606	0.195135	0.709665
RNA Polymerase III Transcription Initiation	2	36	0.0025226	0.0706606	0.195135	0.709665
TGF-beta receptor signaling activates SMADs	2	36	0.0025226	0.0706606	0.195135	0.709665
NOTCH3 Intracellular Domain Regulates Transcription	2	36	0.0025226	0.0706606	0.195135	0.709665
SUMO E3 ligases SUMOylate target proteins	5	183	0.0128232	0.0718425	0.195135	0.709665
RHO GTPases activate PKNs	3	80	0.00560577	0.0733172	0.195135	0.709665
EGFR downregulation	2	37	0.00259267	0.0740712	0.195135	0.709665
Cooperation of Prefoldin and TriC/CCT in actin and tubulin folding	2	37	0.00259267	0.0740712	0.195135	0.709665
Trafficking of AMPA receptors	2	37	0.00259267	0.0740712	0.195135	0.709665
Recruitment of mitotic centrosome proteins and complexes	3	81	0.00567585	0.0754601	0.195135	0.709665
Transcription of the HIV genome	3	81	0.00567585	0.0754601	0.195135	0.709665
Translocation of SLC2A4 (GLUT4) to the plasma membrane	3	81	0.00567585	0.0754601	0.195135	0.709665
SMAD2/SMAD3:SMAD4 heterotrimer regulates transcription	2	38	0.00266274	0.0775336	0.195135	0.709665
Signaling by NOTCH2	2	38	0.00266274	0.0775336	0.195135	0.709665
Centrosome maturation	3	83	0.00581599	0.0798281	0.195135	0.709665
Iron uptake and transport	3	83	0.00581599	0.0798281	0.195135	0.709665
FLT3 signaling by CBL mutants	1	7	0.000490505	0.080925	0.195135	0.709665
Loss of phosphorylation of MECP2 at T308	1	7	0.000490505	0.080925	0.195135	0.709665
NrCAM interactions	1	7	0.000490505	0.080925	0.195135	0.709665
Tat-mediated HIV elongation arrest and recovery	2	39	0.00273281	0.0810461	0.195135	0.709665
Pausing and recovery of Tat-mediated HIV elongation	2	39	0.00273281	0.0810461	0.195135	0.709665
HDR through Single Strand Annealing (SSA)	2	39	0.00273281	0.0810461	0.195135	0.709665
TAK1 activates NFkB by phosphorylation and activation of IKKs complex	2	39	0.00273281	0.0810461	0.195135	0.709665
CREB1 phosphorylation through NMDA receptor-mediated activation of RAS signaling	2	39	0.00273281	0.0810461	0.195135	0.709665
Sealing of the nuclear envelope (NE) by ESCRT-III	2	39	0.00273281	0.0810461	0.195135	0.709665
Glutamate binding, activation of AMPA receptors and synaptic plasticity	2	39	0.00273281	0.0810461	0.195135	0.709665
Mitotic Prophase	4	135	0.00945974	0.0816667	0.195135	0.709665
SUMOylation	5	192	0.0134539	0.0840515	0.195135	0.709665
HIV elongation arrest and recovery	2	40	0.00280289	0.0846071	0.195135	0.709665
Pausing and recovery of HIV elongation	2	40	0.00280289	0.0846071	0.195135	0.709665
DNA Damage Recognition in GG-NER	2	40	0.00280289	0.0846071	0.195135	0.709665
Presynaptic phase of homologous DNA pairing and strand exchange	2	41	0.00287296	0.0882149	0.195135	0.709665
Gap junction assembly	2	41	0.00287296	0.0882149	0.195135	0.709665
Signaling by TGF-beta Receptor Complex	3	87	0.00609628	0.0888849	0.195135	0.709665
RNA Polymerase II Pre-transcription Events	3	88	0.00616635	0.091214	0.195135	0.709665
IkBA variant leads to EDA-ID	1	8	0.000560577	0.0919414	0.195135	0.709665
Signaling by Overexpressed Wild-Type EGFR in Cancer	1	8	0.000560577	0.0919414	0.195135	0.709665
Inhibition of Signaling by Overexpressed EGFR	1	8	0.000560577	0.0919414	0.195135	0.709665
Cam-PDE 1 activation	1	8	0.000560577	0.0919414	0.195135	0.709665
Maturation of protein E	1	8	0.000560577	0.0919414	0.195135	0.709665
Maturation of protein E	1	8	0.000560577	0.0919414	0.195135	0.709665
RND1 GTPase cycle	2	43	0.0030131	0.0955644	0.195135	0.709665
RND3 GTPase cycle	2	43	0.0030131	0.0955644	0.195135	0.709665
Glycogen metabolism	2	43	0.0030131	0.0955644	0.195135	0.709665
BMAL1:CLOCK,NPAS2 activates circadian gene expression	2	43	0.0030131	0.0955644	0.195135	0.709665
FGFR2 mutant receptor activation	2	43	0.0030131	0.0955644	0.195135	0.709665
RND2 GTPase cycle	2	44	0.00308318	0.099303	0.195135	0.709665
Deactivation of the beta-catenin transactivating complex	2	44	0.00308318	0.099303	0.195135	0.709665
Homologous DNA Pairing and Strand Exchange	2	44	0.00308318	0.099303	0.195135	0.709665
PTK6 promotes HIF1A stabilization	1	9	0.00063065	0.102826	0.195135	0.709665
E2F-enabled inhibition of pre-replication complex formation	1	9	0.00063065	0.102826	0.195135	0.709665
Transcriptional regulation of pluripotent stem cells	2	45	0.00315325	0.103082	0.195135	0.709665
Ub-specific processing proteases	5	206	0.0144349	0.105072	0.195135	0.709665
RNA polymerase II transcribes snRNA genes	3	94	0.00658678	0.105709	0.195135	0.709665
MyD88 cascade initiated on plasma membrane	3	94	0.00658678	0.105709	0.195135	0.709665
Toll Like Receptor 5 (TLR5) Cascade	3	94	0.00658678	0.105709	0.195135	0.709665
Toll Like Receptor 10 (TLR10) Cascade	3	94	0.00658678	0.105709	0.195135	0.709665
RNA Polymerase III Abortive And Retractive Initiation	2	46	0.00322332	0.1069	0.195135	0.709665
RNA Polymerase III Transcription	2	46	0.00322332	0.1069	0.195135	0.709665
RAS processing	2	46	0.00322332	0.1069	0.195135	0.709665
MHC class II antigen presentation	4	149	0.0104408	0.10702	0.195135	0.709665
HCMV Infection	6	270	0.0189195	0.109708	0.195135	0.709665
Chaperonin-mediated protein folding	3	96	0.00672693	0.11073	0.195135	0.709665
Interleukin-12 family signaling	3	96	0.00672693	0.11073	0.195135	0.709665
Formation of Incision Complex in GG-NER	2	47	0.00329339	0.110756	0.195135	0.709665
Cilium Assembly	5	210	0.0147152	0.111516	0.195135	0.709665
Uptake and function of diphtheria toxin	1	10	0.000700722	0.113582	0.195135	0.709665
Regulation of PTEN localization	1	10	0.000700722	0.113582	0.195135	0.709665
Glycoprotein hormones	1	10	0.000700722	0.113582	0.195135	0.709665
POU5F1 (OCT4), SOX2, NANOG repress genes related to differentiation	1	10	0.000700722	0.113582	0.195135	0.709665
Resolution of Abasic Sites (AP sites)	2	48	0.00336346	0.114648	0.195135	0.709665
Organelle biogenesis and maintenance	7	338	0.0236844	0.115991	0.195135	0.709665
Anchoring of the basal body to the plasma membrane	3	99	0.00693715	0.118431	0.195135	0.709665
TCF dependent signaling in response to WNT	5	216	0.0151356	0.121531	0.195135	0.709665
SARS-CoV Infections	5	217	0.0152057	0.12324	0.195135	0.709665
TRAF6 mediated induction of NFkB and MAP kinases upon TLR7/8 or 9 activation	3	101	0.00707729	0.123673	0.195135	0.709665
SLBP Dependent Processing of Replication-Dependent Histone Pre-mRNAs	1	11	0.000770794	0.124209	0.195135	0.709665
EGFR interacts with phospholipase C-gamma	1	11	0.000770794	0.124209	0.195135	0.709665
CREB1 phosphorylation through the activation of CaMKII/CaMKK/CaMKIV cascasde	1	11	0.000770794	0.124209	0.195135	0.709665
Myoclonic epilepsy of Lafora	1	11	0.000770794	0.124209	0.195135	0.709665
CDC6 association with the ORC:origin complex	1	11	0.000770794	0.124209	0.195135	0.709665
Downregulation of ERBB4 signaling	1	11	0.000770794	0.124209	0.195135	0.709665
Modulation by Mtb of host immune system	1	11	0.000770794	0.124209	0.195135	0.709665
PTK6 Regulates RTKs and Their Effectors AKT1 and DOK1	1	11	0.000770794	0.124209	0.195135	0.709665
RUNX1 regulates transcription of genes involved in differentiation of keratinocytes	1	11	0.000770794	0.124209	0.195135	0.709665
Protein folding	3	102	0.00714736	0.126325	0.195135	0.709665
Toll Like Receptor 3 (TLR3) Cascade	3	102	0.00714736	0.126325	0.195135	0.709665
MyD88 dependent cascade initiated on endosome	3	102	0.00714736	0.126325	0.195135	0.709665
Regulation of ornithine decarboxylase (ODC)	2	51	0.00357368	0.126526	0.195135	0.709665
G1 Phase	2	51	0.00357368	0.126526	0.195135	0.709665
Cyclin D associated events in G1	2	51	0.00357368	0.126526	0.195135	0.709665
Toll Like Receptor 7/8 (TLR7/8) Cascade	3	103	0.00721743	0.128998	0.195135	0.709665
Gap junction trafficking	2	52	0.00364375	0.130549	0.195135	0.709665
Activation of RAC1 downstream of NMDARs	1	12	0.000840866	0.134709	0.195135	0.709665
IRAK2 mediated activation of TAK1 complex	1	12	0.000840866	0.134709	0.195135	0.709665
Calcineurin activates NFAT	1	12	0.000840866	0.134709	0.195135	0.709665
Activation of the AP-1 family of transcription factors	1	12	0.000840866	0.134709	0.195135	0.709665
Enzymatic degradation of Dopamine by monoamine oxidase	1	12	0.000840866	0.134709	0.195135	0.709665
Activation of the TFAP2 (AP-2) family of transcription factors	1	12	0.000840866	0.134709	0.195135	0.709665
Toll Like Receptor 9 (TLR9) Cascade	3	106	0.00742765	0.137135	0.195135	0.709665
Late Phase of HIV Life Cycle	4	164	0.0114918	0.137619	0.195135	0.709665
Deubiquitination	6	289	0.0202509	0.13812	0.195135	0.709665
Nucleosome assembly	2	54	0.0037839	0.138681	0.195135	0.709665
Deposition of new CENPA-containing nucleosomes at the centromere	2	54	0.0037839	0.138681	0.195135	0.709665
Cell recruitment (pro-inflammatory response)	2	54	0.0037839	0.138681	0.195135	0.709665
Purinergic signaling in leishmaniasis infection	2	54	0.0037839	0.138681	0.195135	0.709665
TRIF(TICAM1)-mediated TLR4 signaling	3	107	0.00749772	0.139886	0.195135	0.709665
MyD88-independent TLR4 cascade	3	107	0.00749772	0.139886	0.195135	0.709665
COPI-mediated anterograde transport	3	107	0.00749772	0.139886	0.195135	0.709665
Infectious disease	21	1357	0.0950879	0.141365	0.195135	0.709665
Carboxyterminal post-translational modifications of tubulin	2	55	0.00385397	0.142788	0.195135	0.709665
Recycling pathway of L1	2	55	0.00385397	0.142788	0.195135	0.709665
TICAM1,TRAF6-dependent induction of TAK1 complex	1	13	0.000910938	0.145085	0.195135	0.709665
CaMK IV-mediated phosphorylation of CREB	1	13	0.000910938	0.145085	0.195135	0.709665
EGFR Transactivation by Gastrin	1	13	0.000910938	0.145085	0.195135	0.709665
Josephin domain DUBs	1	13	0.000910938	0.145085	0.195135	0.709665
Enzymatic degradation of dopamine by COMT	1	13	0.000910938	0.145085	0.195135	0.709665
Receptor Mediated Mitophagy	1	13	0.000910938	0.145085	0.195135	0.709665
Hormone ligand-binding receptors	1	13	0.000910938	0.145085	0.195135	0.709665
Peptide hormone biosynthesis	1	13	0.000910938	0.145085	0.195135	0.709665
Interleukin-27 signaling	1	13	0.000910938	0.145085	0.195135	0.709665
Gap junction trafficking and regulation	2	56	0.00392404	0.14692	0.195135	0.709665
Neurotransmitter receptors and postsynaptic signal transmission	5	232	0.0162567	0.150184	0.195135	0.709665
Regulation of RUNX3 expression and activity	2	57	0.00399411	0.151077	0.195135	0.709665
Transcriptional activity of SMAD2/SMAD3:SMAD4 heterotrimer	2	57	0.00399411	0.151077	0.195135	0.709665
Signaling by FGFR2 in disease	2	58	0.00406419	0.155258	0.195135	0.709665
Alpha-protein kinase 1 signaling pathway	1	14	0.00098101	0.155336	0.195135	0.709665
TICAM1-dependent activation of IRF3/IRF7	1	14	0.00098101	0.155336	0.195135	0.709665
InlA-mediated entry of Listeria monocytogenes into host cells	1	14	0.00098101	0.155336	0.195135	0.709665
CD163 mediating an anti-inflammatory response	1	14	0.00098101	0.155336	0.195135	0.709665
Fc epsilon receptor (FCERI) signaling	5	235	0.016467	0.155852	0.195135	0.709665
CDT1 association with the CDC6:ORC:origin complex	2	59	0.00413426	0.15946	0.195135	0.709665
Stabilization of p53	2	59	0.00413426	0.15946	0.195135	0.709665
Cargo recognition for clathrin-mediated endocytosis	3	115	0.0080583	0.162536	0.195135	0.709665
Uptake and actions of bacterial toxins	2	60	0.00420433	0.163683	0.195135	0.709665
Condensation of Prometaphase Chromosomes	1	15	0.00105108	0.165466	0.195135	0.709665
PI3K events in ERBB4 signaling	1	15	0.00105108	0.165466	0.195135	0.709665
ATF6 (ATF6-alpha) activates chaperone genes	1	15	0.00105108	0.165466	0.195135	0.709665
Reduction of cytosolic Ca++ levels	1	15	0.00105108	0.165466	0.195135	0.709665
Sodium/Calcium exchangers	1	15	0.00105108	0.165466	0.195135	0.709665
Regulation of gene expression by Hypoxia-inducible Factor	1	15	0.00105108	0.165466	0.195135	0.709665
Signaling by EGFR	2	61	0.0042744	0.167927	0.195135	0.709665
Golgi Associated Vesicle Biogenesis	2	61	0.0042744	0.167927	0.195135	0.709665
HIV Life Cycle	4	179	0.0125429	0.171298	0.195135	0.709665
MyD88:MAL(TIRAP) cascade initiated on plasma membrane	3	118	0.00826852	0.171301	0.195135	0.709665
Toll Like Receptor TLR6:TLR2 Cascade	3	118	0.00826852	0.171301	0.195135	0.709665
Translation initiation complex formation	2	62	0.00434447	0.172189	0.195135	0.709665
SCF(Skp2)-mediated degradation of p27/p21	2	62	0.00434447	0.172189	0.195135	0.709665
RUNX3 regulates p14-ARF	1	16	0.00112115	0.175474	0.195135	0.709665
GRB2 events in EGFR signaling	1	16	0.00112115	0.175474	0.195135	0.709665
Downregulation of ERBB2:ERBB3 signaling	1	16	0.00112115	0.175474	0.195135	0.709665
Signaling by NOTCH1 HD Domain Mutants in Cancer	1	16	0.00112115	0.175474	0.195135	0.709665
Constitutive Signaling by NOTCH1 HD Domain Mutants	1	16	0.00112115	0.175474	0.195135	0.709665
Trafficking and processing of endosomal TLR	1	16	0.00112115	0.175474	0.195135	0.709665
IRAK1 recruits IKK complex	1	16	0.00112115	0.175474	0.195135	0.709665
IRAK1 recruits IKK complex upon TLR7/8 or 9 stimulation	1	16	0.00112115	0.175474	0.195135	0.709665
Loss of function of MECP2 in Rett syndrome	1	16	0.00112115	0.175474	0.195135	0.709665
Disorders of Developmental Biology	1	16	0.00112115	0.175474	0.195135	0.709665
Disorders of Nervous System Development	1	16	0.00112115	0.175474	0.195135	0.709665
Pervasive developmental disorders	1	16	0.00112115	0.175474	0.195135	0.709665
Attachment and Entry	1	16	0.00112115	0.175474	0.195135	0.709665
Regulation of FOXO transcriptional activity by acetylation	1	16	0.00112115	0.175474	0.195135	0.709665
p75NTR recruits signalling complexes	1	16	0.00112115	0.175474	0.195135	0.709665
Reversal of alkylation damage by DNA dioxygenases	1	16	0.00112115	0.175474	0.195135	0.709665
HDACs deacetylate histones	2	63	0.00441455	0.176469	0.195135	0.709665
GTP hydrolysis and joining of the 60S ribosomal subunit	3	120	0.00840866	0.177218	0.195135	0.709665
EML4 and NUDC in mitotic spindle formation	3	121	0.00847873	0.180197	0.195135	0.709665
Toll Like Receptor TLR1:TLR2 Cascade	3	121	0.00847873	0.180197	0.195135	0.709665
Toll Like Receptor 2 (TLR2) Cascade	3	121	0.00847873	0.180197	0.195135	0.709665
Deadenylation-dependent mRNA decay	2	65	0.00455469	0.185078	0.195135	0.709665
Defective binding of RB1 mutants to E2F1,(E2F2, E2F3)	1	17	0.00119123	0.185363	0.195135	0.709665
Membrane binding and targetting of GAG proteins	1	17	0.00119123	0.185363	0.195135	0.709665
Formation of Senescence-Associated Heterochromatin Foci (SAHF)	1	17	0.00119123	0.185363	0.195135	0.709665
Aberrant regulation of mitotic G1/S transition in cancer due to RB1 defects	1	17	0.00119123	0.185363	0.195135	0.709665
Dopamine clearance from the synaptic cleft	1	17	0.00119123	0.185363	0.195135	0.709665
CREB1 phosphorylation through the activation of Adenylate Cyclase	1	17	0.00119123	0.185363	0.195135	0.709665
IL-6-type cytokine receptor ligand interactions	1	17	0.00119123	0.185363	0.195135	0.709665
ATF6 (ATF6-alpha) activates chaperones	1	17	0.00119123	0.185363	0.195135	0.709665
TRAF6 mediated IRF7 activation in TLR7/8 or 9 signaling	1	17	0.00119123	0.185363	0.195135	0.709665
Replication of the SARS-CoV-1 genome	1	17	0.00119123	0.185363	0.195135	0.709665
Downstream TCR signaling	3	124	0.00868895	0.189218	0.195135	0.709665
Hedgehog 'off' state	3	124	0.00868895	0.189218	0.195135	0.709665
PI3K/AKT Signaling in Cancer	3	124	0.00868895	0.189218	0.195135	0.709665
Activation of the mRNA upon binding of the cap-binding complex and eIFs, and subsequent binding to 43S	2	66	0.00462476	0.189405	0.195135	0.709665
Toll-like Receptor Cascades	4	188	0.0131736	0.192762	0.195135	0.709665
ERBB2 Activates PTK6 Signaling	1	18	0.0012613	0.195135	0.195135	0.709665
Prolactin receptor signaling	1	18	0.0012613	0.195135	0.195135	0.709665
IRAK2 mediated activation of TAK1 complex upon TLR7/8 or 9 stimulation	1	18	0.0012613	0.195135	0.195135	0.709665
CLEC7A (Dectin-1) induces NFAT activation	1	18	0.0012613	0.195135	0.195135	0.709665
Synthesis And Processing Of GAG, GAGPOL Polyproteins	1	18	0.0012613	0.195135	0.195135	0.709665
NRIF signals cell death from the nucleus	1	18	0.0012613	0.195135	0.195135	0.709665
MAP3K8 (TPL2)-dependent MAPK1/3 activation	1	18	0.0012613	0.195135	0.195135	0.709665
Regulation of BACH1 activity	1	18	0.0012613	0.195135	0.195135	0.709665
SARS-CoV-1 Genome Replication and Transcription	1	18	0.0012613	0.195135	0.195135	0.709665
Signaling by the B Cell Receptor (BCR)	4	189	0.0132436	0.195198	0.195198	0.709525
Signaling by ERBB2	2	68	0.00476491	0.1981	0.1981	0.703115
Kinesins	2	68	0.00476491	0.1981	0.1981	0.703115
MAP kinase activation	2	69	0.00483498	0.202466	0.202466	0.693647
SHC1 events in EGFR signaling	1	19	0.00133137	0.20479	0.20479	0.688692
ERBB2 Regulates Cell Motility	1	19	0.00133137	0.20479	0.20479	0.688692
TRAF6-mediated induction of TAK1 complex within TLR4 complex	1	19	0.00133137	0.20479	0.20479	0.688692
Processing of Intronless Pre-mRNAs	1	19	0.00133137	0.20479	0.20479	0.688692
InlB-mediated entry of Listeria monocytogenes into host cell	1	19	0.00133137	0.20479	0.20479	0.688692
TGF-beta receptor signaling in EMT (epithelial to mesenchymal transition)	1	19	0.00133137	0.20479	0.20479	0.688692
TICAM1, RIP1-mediated IKK complex recruitment	1	19	0.00133137	0.20479	0.20479	0.688692
RIP-mediated NFkB activation via ZBP1	1	19	0.00133137	0.20479	0.20479	0.688692
Tristetraprolin (TTP, ZFP36) binds and destabilizes mRNA	1	19	0.00133137	0.20479	0.20479	0.688692
Spry regulation of FGF signaling	1	19	0.00133137	0.20479	0.20479	0.688692
Butyrate Response Factor 1 (BRF1) binds and destabilizes mRNA	1	19	0.00133137	0.20479	0.20479	0.688692
DNA Damage Reversal	1	19	0.00133137	0.20479	0.20479	0.688692
Heme signaling	2	70	0.00490505	0.206843	0.206843	0.684359
Cap-dependent Translation Initiation	3	130	0.00910938	0.207591	0.207591	0.682792
Eukaryotic Translation Initiation	3	130	0.00910938	0.207591	0.207591	0.682792
L1CAM interactions	3	130	0.00910938	0.207591	0.207591	0.682792
Transcriptional regulation by RUNX1	5	261	0.0182888	0.208384	0.208384	0.681135
Separation of Sister Chromatids	4	195	0.0136641	0.21001	0.21001	0.67776
rRNA modification in the nucleus and cytosol	2	71	0.00497512	0.21123	0.21123	0.675244
Nucleotide-binding domain, leucine rich repeat containing receptor (NLR) signaling pathways	2	71	0.00497512	0.21123	0.21123	0.675244
Signaling by Non-Receptor Tyrosine Kinases	2	71	0.00497512	0.21123	0.21123	0.675244
Signaling by PTK6	2	71	0.00497512	0.21123	0.21123	0.675244
Signaling by WNT	6	332	0.023264	0.213233	0.213233	0.671145
Activation of IRF3/IRF7 mediated by TBK1/IKK epsilon	1	20	0.00140144	0.214329	0.214329	0.668919
Attachment and Entry	1	20	0.00140144	0.214329	0.214329	0.668919
KSRP (KHSRP) binds and destabilizes mRNA	1	20	0.00140144	0.214329	0.214329	0.668919
Killing mechanisms	1	20	0.00140144	0.214329	0.214329	0.668919
WNT5:FZD7-mediated leishmania damping	1	20	0.00140144	0.214329	0.214329	0.668919
SUMOylation of transcription factors	1	20	0.00140144	0.214329	0.214329	0.668919
Negative regulation of FLT3	1	20	0.00140144	0.214329	0.214329	0.668919
Replication of the SARS-CoV-2 genome	1	20	0.00140144	0.214329	0.214329	0.668919
Viral Messenger RNA Synthesis	2	72	0.0050452	0.215626	0.215626	0.666298
Gene and protein expression by JAK-STAT signaling after Interleukin-12 stimulation	2	73	0.00511527	0.220031	0.220031	0.657516
Resolution of Sister Chromatid Cohesion	3	134	0.00938967	0.220057	0.220057	0.657465
SHC1 events in ERBB4 signaling	1	21	0.00147152	0.223755	0.223755	0.650227
GRB2 events in ERBB2 signaling	1	21	0.00147152	0.223755	0.223755	0.650227
Regulation of innate immune responses to cytosolic DNA	1	21	0.00147152	0.223755	0.223755	0.650227
TFAP2 (AP-2) family regulates transcription of growth factors and their receptors	1	21	0.00147152	0.223755	0.223755	0.650227
SARS-CoV-2 Genome Replication and Transcription	1	21	0.00147152	0.223755	0.223755	0.650227
Gamma carboxylation, hypusine formation and arylsulfatase activation	2	74	0.00518534	0.224444	0.224444	0.648893
C-type lectin receptors (CLRs)	4	203	0.0142247	0.230236	0.230236	0.637827
Removal of the Flap Intermediate from the C-strand	1	22	0.00154159	0.233068	0.233068	0.632517
Telomere C-strand synthesis initiation	1	22	0.00154159	0.233068	0.233068	0.632517
Regulation of FZD by ubiquitination	1	22	0.00154159	0.233068	0.233068	0.632517
PI3K events in ERBB2 signaling	1	22	0.00154159	0.233068	0.233068	0.632517
Elevation of cytosolic Ca2+ levels	1	22	0.00154159	0.233068	0.233068	0.632517
Glycogen storage diseases	1	22	0.00154159	0.233068	0.233068	0.632517
Uptake and function of anthrax toxins	1	22	0.00154159	0.233068	0.233068	0.632517
Transmission across Chemical Synapses	6	343	0.0240348	0.234428	0.234428	0.629991
Interleukin-17 signaling	2	77	0.00539556	0.237718	0.237718	0.623938
Ion channel transport	4	206	0.0144349	0.237945	0.237945	0.623524
GAB1 signalosome	1	23	0.00161166	0.242271	0.242271	0.615699
Chaperone Mediated Autophagy	1	23	0.00161166	0.242271	0.242271	0.615699
PKA activation	1	23	0.00161166	0.242271	0.242271	0.615699
Synaptic adhesion-like molecules	1	23	0.00161166	0.242271	0.242271	0.615699
Translation of Replicase and Assembly of the Replication Transcription Complex	1	23	0.00161166	0.242271	0.242271	0.615699
ZBP1(DAI) mediated induction of type I IFNs	1	23	0.00161166	0.242271	0.242271	0.615699
Metabolism of polyamines	2	80	0.00560577	0.251033	0.251033	0.600269
trans-Golgi Network Vesicle Budding	2	80	0.00560577	0.251033	0.251033	0.600269
APC/C:Cdc20 mediated degradation of Cyclin B	1	24	0.00168173	0.251363	0.251363	0.599698
RHOBTB1 GTPase cycle	1	24	0.00168173	0.251363	0.251363	0.599698
Gastrin-CREB signalling pathway via PKC and MAPK	1	24	0.00168173	0.251363	0.251363	0.599698
mRNA decay by 3' to 5' exoribonuclease	1	24	0.00168173	0.251363	0.251363	0.599698
IKK complex recruitment mediated by RIP1	1	24	0.00168173	0.251363	0.251363	0.599698
RHO GTPases Activate ROCKs	1	24	0.00168173	0.251363	0.251363	0.599698
E2F mediated regulation of DNA replication	1	24	0.00168173	0.251363	0.251363	0.599698
The NLRP3 inflammasome	1	24	0.00168173	0.251363	0.251363	0.599698
Regulation of signaling by CBL	1	24	0.00168173	0.251363	0.251363	0.599698
Diseases of signal transduction by growth factor receptors and second messengers	8	498	0.0348959	0.253833	0.253833	0.595453
Signaling by ERBB4	2	82	0.00574592	0.259923	0.259923	0.585156
Signaling by FGFR in disease	2	82	0.00574592	0.259923	0.259923	0.585156
Negative regulation of MET activity	1	25	0.0017518	0.260347	0.260347	0.584447
Creatine metabolism	1	25	0.0017518	0.260347	0.260347	0.584447
Sema4D induced cell migration and growth-cone collapse	1	25	0.0017518	0.260347	0.260347	0.584447
Organic anion transporters	1	25	0.0017518	0.260347	0.260347	0.584447
Translation of Replicase and Assembly of the Replication Transcription Complex	1	25	0.0017518	0.260347	0.260347	0.584447
TCR signaling	3	147	0.0103006	0.261496	0.261496	0.582536
Transcriptional regulation by RUNX2	3	147	0.0103006	0.261496	0.261496	0.582536
Developmental Biology	18	1263	0.0885012	0.262854	0.262854	0.580285
ISG15 antiviral mechanism	2	83	0.00581599	0.264369	0.264369	0.577789
Golgi-to-ER retrograde transport	3	148	0.0103707	0.264729	0.264729	0.577199
RHO GTPases Activate Formins	3	149	0.0104408	0.267967	0.267967	0.571919
Interleukin-12 signaling	2	84	0.00588606	0.268816	0.268816	0.570545
APC-Cdc20 mediated degradation of Nek2A	1	26	0.00182188	0.269224	0.269224	0.569886
JNK (c-Jun kinases) phosphorylation and activation mediated by activated human TAK1	1	26	0.00182188	0.269224	0.269224	0.569886
Glycogen breakdown (glycogenolysis)	1	26	0.00182188	0.269224	0.269224	0.569886
Prevention of phagosomal-lysosomal fusion	1	26	0.00182188	0.269224	0.269224	0.569886
PKA-mediated phosphorylation of CREB	1	26	0.00182188	0.269224	0.269224	0.569886
Glycogen synthesis	1	26	0.00182188	0.269224	0.269224	0.569886
Constitutive Signaling by Ligand-Responsive EGFR Cancer Variants	1	26	0.00182188	0.269224	0.269224	0.569886
Signaling by Ligand-Responsive EGFR Variants in Cancer	1	26	0.00182188	0.269224	0.269224	0.569886
Toll Like Receptor 4 (TLR4) Cascade	3	151	0.0105809	0.274457	0.274457	0.561526
Nuclear Receptor transcription pathway	2	86	0.00602621	0.277708	0.277708	0.556411
Cellular response to hypoxia	2	86	0.00602621	0.277708	0.277708	0.556411
Listeria monocytogenes entry into host cells	1	27	0.00189195	0.277995	0.277995	0.555963
Assembly Of The HIV Virion	1	27	0.00189195	0.277995	0.277995	0.555963
activated TAK1 mediates p38 MAPK activation	1	27	0.00189195	0.277995	0.277995	0.555963
RHO GTPases activate PAKs	1	27	0.00189195	0.277995	0.277995	0.555963
Inactivation of CSF3 (G-CSF) signaling	1	27	0.00189195	0.277995	0.277995	0.555963
Intracellular signaling by second messengers	6	366	0.0256464	0.280665	0.280665	0.551811
Membrane Trafficking	10	667	0.0467381	0.285295	0.285295	0.544705
Cyclin E associated events during G1/S transition	2	88	0.00616635	0.286594	0.286594	0.542733
Transcriptional activation of mitochondrial biogenesis	2	88	0.00616635	0.286594	0.286594	0.542733
Nuclear Envelope (NE) Reassembly	2	88	0.00616635	0.286594	0.286594	0.542733
Deadenylation of mRNA	1	28	0.00196202	0.286661	0.286661	0.542631
NOTCH3 Activation and Transmission of Signal to the Nucleus	1	28	0.00196202	0.286661	0.286661	0.542631
TP53 regulates transcription of several additional cell death genes whose specific roles in p53-dependent apoptosis remain uncertain	1	28	0.00196202	0.286661	0.286661	0.542631
Unfolded Protein Response (UPR)	3	155	0.0108612	0.287485	0.287485	0.541385
Thyroxine biosynthesis	1	29	0.00203209	0.295224	0.295224	0.529848
Estrogen-dependent nuclear events downstream of ESR-membrane signaling	1	29	0.00203209	0.295224	0.295224	0.529848
Growth hormone receptor signaling	1	29	0.00203209	0.295224	0.295224	0.529848
Cyclin A:Cdk2-associated events at S phase entry	2	90	0.0063065	0.295468	0.295468	0.529489
Signaling by ERBB2 TMD/JMD mutants	1	30	0.00210217	0.303685	0.303685	0.517577
TRAF6 mediated NF-kB activation	1	30	0.00210217	0.303685	0.303685	0.517577
TNFR1-induced NFkappaB signaling pathway	1	30	0.00210217	0.303685	0.303685	0.517577
Interleukin-6 family signaling	1	30	0.00210217	0.303685	0.303685	0.517577
Signaling by BMP	1	30	0.00210217	0.303685	0.303685	0.517577
Deregulated CDK5 triggers multiple neurodegenerative pathways in Alzheimer's disease models	1	30	0.00210217	0.303685	0.303685	0.517577
Neurodegenerative Diseases	1	30	0.00210217	0.303685	0.303685	0.517577
Clathrin-mediated endocytosis	3	161	0.0112816	0.307112	0.307112	0.512703
Regulation of mRNA stability by proteins that bind AU-rich elements	2	93	0.00651671	0.30875	0.30875	0.510393
HDMs demethylate histones	1	31	0.00217224	0.312045	0.312045	0.505783
VEGFR2 mediated cell proliferation	1	31	0.00217224	0.312045	0.312045	0.505783
Sema4D in semaphorin signaling	1	31	0.00217224	0.312045	0.312045	0.505783
Interleukin-7 signaling	1	31	0.00217224	0.312045	0.312045	0.505783
Antiviral mechanism by IFN-stimulated genes	2	94	0.00658678	0.313167	0.313167	0.504224
ER to Golgi Anterograde Transport	3	164	0.0114918	0.316949	0.316949	0.49901
Metalloprotease DUBs	1	32	0.00224231	0.320304	0.320304	0.494437
Activated NOTCH1 Transmits Signal to the Nucleus	1	32	0.00224231	0.320304	0.320304	0.494437
Suppression of phagosomal maturation	1	32	0.00224231	0.320304	0.320304	0.494437
Processive synthesis on the C-strand of the telomere	1	33	0.00231238	0.328466	0.328466	0.48351
Downregulation of SMAD2/3:SMAD4 transcriptional activity	1	33	0.00231238	0.328466	0.328466	0.48351
ER Quality Control Compartment (ERQC)	1	33	0.00231238	0.328466	0.328466	0.48351
Defective Intrinsic Pathway for Apoptosis	1	33	0.00231238	0.328466	0.328466	0.48351
Signaling by Hedgehog	3	168	0.0117721	0.330074	0.330074	0.481389
UCH proteinases	2	98	0.00686707	0.33077	0.33077	0.480474
Telomere Extension By Telomerase	1	34	0.00238245	0.33653	0.33653	0.472977
Phase 0 - rapid depolarisation	1	34	0.00238245	0.33653	0.33653	0.472977
Neurotransmitter clearance	1	34	0.00238245	0.33653	0.33653	0.472977
Negative regulation of FGFR3 signaling	1	34	0.00238245	0.33653	0.33653	0.472977
Inflammasomes	1	34	0.00238245	0.33653	0.33653	0.472977
DDX58/IFIH1-mediated induction of interferon-alpha/beta	2	100	0.00700722	0.339526	0.339526	0.469127
PIP3 activates AKT signaling	5	319	0.022353	0.340505	0.340505	0.467876
Endosomal Sorting Complex Required For Transport (ESCRT)	1	35	0.00245253	0.344497	0.344497	0.462814
Late endosomal microautophagy	1	35	0.00245253	0.344497	0.344497	0.462814
Signaling by ERBB2 KD Mutants	1	35	0.00245253	0.344497	0.344497	0.462814
Negative regulation of FGFR4 signaling	1	35	0.00245253	0.344497	0.344497	0.462814
MAPK targets/ Nuclear events mediated by MAP kinases	1	35	0.00245253	0.344497	0.344497	0.462814
DARPP-32 events	1	35	0.00245253	0.344497	0.344497	0.462814
Signaling by CSF3 (G-CSF)	1	35	0.00245253	0.344497	0.344497	0.462814
SHC1 events in ERBB2 signaling	1	36	0.0025226	0.35237	0.35237	0.453002
Aberrant regulation of mitotic cell cycle due to RB1 defects	1	36	0.0025226	0.35237	0.35237	0.453002
Signaling by ERBB2 in Cancer	1	36	0.0025226	0.35237	0.35237	0.453002
Activation of BH3-only proteins	1	36	0.0025226	0.35237	0.35237	0.453002
Mitotic Anaphase	4	249	0.017448	0.353	0.353	0.452225
FCERI mediated NF-kB activation	3	175	0.0122626	0.353024	0.353024	0.452196
HCMV Late Events	3	175	0.0122626	0.353024	0.353024	0.452196
Mitotic Metaphase and Anaphase	4	250	0.017518	0.355724	0.355724	0.448887
Budding and maturation of HIV virion	1	37	0.00259267	0.360148	0.360148	0.443519
eNOS activation	1	37	0.00259267	0.360148	0.360148	0.443519
Negative regulators of DDX58/IFIH1 signaling	1	37	0.00259267	0.360148	0.360148	0.443519
Tetrahydrobiopterin (BH4) synthesis, recycling, salvage and regulation	1	37	0.00259267	0.360148	0.360148	0.443519
Leishmania infection	6	406	0.0284493	0.365036	0.365036	0.437664
MAPK6/MAPK4 signaling	2	106	0.00742765	0.365573	0.365573	0.437026
RHOH GTPase cycle	1	38	0.00266274	0.367834	0.367834	0.434349
Diseases of mitotic cell cycle	1	38	0.00266274	0.367834	0.367834	0.434349
Regulation of necroptotic cell death	1	38	0.00266274	0.367834	0.367834	0.434349
COPI-dependent Golgi-to-ER retrograde traffic	2	107	0.00749772	0.369877	0.369877	0.431942
Signaling by Interleukins	9	643	0.0450564	0.371724	0.371724	0.42978
Transferrin endocytosis and recycling	1	39	0.00273281	0.375427	0.375427	0.425474
Regulation of MECP2 expression and activity	1	39	0.00273281	0.375427	0.375427	0.425474
Negative regulation of FGFR1 signaling	1	39	0.00273281	0.375427	0.375427	0.425474
SUMOylation of SUMOylation proteins	1	39	0.00273281	0.375427	0.375427	0.425474
Metabolism of ingested SeMet, Sec, MeSec into H2Se	1	39	0.00273281	0.375427	0.375427	0.425474
Synthesis of IP3 and IP4 in the cytosol	1	39	0.00273281	0.375427	0.375427	0.425474
Interleukin-1 signaling	2	109	0.00763787	0.378452	0.378452	0.42199
HATs acetylate histones	2	110	0.00770794	0.382721	0.382721	0.417118
p75 NTR receptor-mediated signalling	2	110	0.00770794	0.382721	0.382721	0.417118
Transport of the SLBP Dependant Mature mRNA	1	40	0.00280289	0.38293	0.38293	0.41688
Association of TriC/CCT with target proteins during biosynthesis	1	40	0.00280289	0.38293	0.38293	0.41688
NOD1/2 Signaling Pathway	1	40	0.00280289	0.38293	0.38293	0.41688
Extra-nuclear estrogen signaling	2	111	0.00777801	0.386978	0.386978	0.412314
Metabolism of nitric oxide: NOS3 activation and regulation	1	41	0.00287296	0.390344	0.390344	0.408553
Negative regulation of FGFR2 signaling	1	41	0.00287296	0.390344	0.390344	0.408553
Calnexin/calreticulin cycle	1	41	0.00287296	0.390344	0.390344	0.408553
Regulation of TNFR1 signaling	1	41	0.00287296	0.390344	0.390344	0.408553
RAF activation	1	41	0.00287296	0.390344	0.390344	0.408553
Signal Transduction	38	2997	0.210006	0.391694	0.391694	0.407053
HIV Infection	4	264	0.0184991	0.393809	0.393809	0.404715
Diseases associated with the TLR signaling cascade	1	42	0.00294303	0.397669	0.397669	0.400479
Diseases of Immune System	1	42	0.00294303	0.397669	0.397669	0.400479
Major pathway of rRNA processing in the nucleolus and cytosol	3	189	0.0132436	0.398585	0.398585	0.399479
Response of EIF2AK4 (GCN2) to amino acid deficiency	2	115	0.0080583	0.403875	0.403875	0.393753
SUMOylation of ubiquitinylation proteins	1	43	0.0030131	0.404906	0.404906	0.392646
Signaling by ALK	1	43	0.0030131	0.404906	0.404906	0.392646
CaM pathway	1	43	0.0030131	0.404906	0.404906	0.392646
Calmodulin induced events	1	43	0.0030131	0.404906	0.404906	0.392646
Ovarian tumor domain proteases	1	44	0.00308318	0.412057	0.412057	0.385043
VEGFR2 mediated vascular permeability	1	44	0.00308318	0.412057	0.412057	0.385043
SUMOylation of transcription cofactors	1	44	0.00308318	0.412057	0.412057	0.385043
Factors involved in megakaryocyte development and platelet production	3	194	0.013594	0.414666	0.414666	0.382302
Platelet homeostasis	2	118	0.00826852	0.416403	0.416403	0.380487
L13a-mediated translational silencing of Ceruloplasmin expression	2	120	0.00840866	0.424681	0.424681	0.371937
RIPK1-mediated regulated necrosis	1	46	0.00322332	0.426104	0.426104	0.370485
Transport of Mature mRNAs Derived from Intronless Transcripts	1	47	0.00329339	0.433001	0.433001	0.363511
Nuclear signaling by ERBB4	1	47	0.00329339	0.433001	0.433001	0.363511
Ca-dependent events	1	48	0.00336346	0.439817	0.439817	0.356728
FLT3 Signaling	1	48	0.00336346	0.439817	0.439817	0.356728
Smooth Muscle Contraction	1	49	0.00343354	0.44655	0.44655	0.35013
Signaling by RAF1 mutants	1	49	0.00343354	0.44655	0.44655	0.35013
PKMTs methylate histone lysines	1	49	0.00343354	0.44655	0.44655	0.35013
Negative regulation of MAPK pathway	1	49	0.00343354	0.44655	0.44655	0.35013
Translation of Structural Proteins	1	49	0.00343354	0.44655	0.44655	0.35013
Regulation of activated PAK-2p34 by proteasome mediated degradation	1	50	0.00350361	0.453204	0.453204	0.343707
Interleukin-3, Interleukin-5 and GM-CSF signaling	1	50	0.00350361	0.453204	0.453204	0.343707
rRNA processing in the nucleus and cytosol	3	207	0.0145049	0.455793	0.455793	0.341233
Mitochondrial biogenesis	2	128	0.00896924	0.457172	0.457172	0.33992
SUMOylation of RNA binding proteins	1	51	0.00357368	0.459777	0.459777	0.337452
TNF signaling	1	51	0.00357368	0.459777	0.459777	0.337452
Signaling by FGFR4	1	51	0.00357368	0.459777	0.459777	0.337452
TBC/RABGAPs	1	51	0.00357368	0.459777	0.459777	0.337452
Response of Mtb to phagocytosis	1	51	0.00357368	0.459777	0.459777	0.337452
EPHB-mediated forward signaling	1	52	0.00364375	0.466273	0.466273	0.33136
Methylation	1	52	0.00364375	0.466273	0.466273	0.33136
Rab regulation of trafficking	2	131	0.00917945	0.469084	0.469084	0.328749
DAG and IP3 signaling	1	53	0.00371383	0.47269	0.47269	0.325423
Fanconi Anemia Pathway	1	53	0.00371383	0.47269	0.47269	0.325423
Vpu mediated degradation of CD4	1	53	0.00371383	0.47269	0.47269	0.325423
RMTs methylate histone arginines	1	53	0.00371383	0.47269	0.47269	0.325423
Signaling by FGFR3	1	53	0.00371383	0.47269	0.47269	0.325423
p53-Independent DNA Damage Response	1	54	0.0037839	0.479031	0.479031	0.319636
Ubiquitin Mediated Degradation of Phosphorylated Cdc25A	1	54	0.0037839	0.479031	0.479031	0.319636
p53-Independent G1/S DNA damage checkpoint	1	54	0.0037839	0.479031	0.479031	0.319636
Regulation of Apoptosis	1	54	0.0037839	0.479031	0.479031	0.319636
Autodegradation of the E3 ubiquitin ligase COP1	1	54	0.0037839	0.479031	0.479031	0.319636
Ubiquitin-dependent degradation of Cyclin D	1	54	0.0037839	0.479031	0.479031	0.319636
Formation of the ternary complex, and subsequently, the 43S complex	1	54	0.0037839	0.479031	0.479031	0.319636
Inactivation, recovery and regulation of the phototransduction cascade	1	54	0.0037839	0.479031	0.479031	0.319636
Paradoxical activation of RAF signaling by kinase inactive BRAF	1	54	0.0037839	0.479031	0.479031	0.319636
Signaling downstream of RAS mutants	1	54	0.0037839	0.479031	0.479031	0.319636
Signaling by moderate kinase activity BRAF mutants	1	54	0.0037839	0.479031	0.479031	0.319636
Signaling by RAS mutants	1	54	0.0037839	0.479031	0.479031	0.319636
MAPK family signaling cascades	5	380	0.0266274	0.484465	0.484465	0.314737
FBXL7 down-regulates AURKA during mitotic entry and in early mitosis	1	55	0.00385397	0.485296	0.485296	0.313993
SCF-beta-TrCP mediated degradation of Emi1	1	55	0.00385397	0.485296	0.485296	0.313993
Vif-mediated degradation of APOBEC3G	1	56	0.00392404	0.491486	0.491486	0.308489
AUF1 (hnRNP D0) binds and destabilizes mRNA	1	56	0.00392404	0.491486	0.491486	0.308489
Intra-Golgi and retrograde Golgi-to-ER traffic	3	219	0.0153458	0.492665	0.492665	0.307448
Transport to the Golgi and subsequent modification	3	219	0.0153458	0.492665	0.492665	0.307448
Degradation of DVL	1	57	0.00399411	0.497602	0.497602	0.303118
Degradation of AXIN	1	57	0.00399411	0.497602	0.497602	0.303118
Negative regulation of NOTCH4 signaling	1	57	0.00399411	0.497602	0.497602	0.303118
N-glycan trimming in the ER and Calnexin/Calreticulin cycle	1	57	0.00399411	0.497602	0.497602	0.303118
NOTCH1 Intracellular Domain Regulates Transcription	1	57	0.00399411	0.497602	0.497602	0.303118
Metabolism of amine-derived hormones	1	58	0.00406419	0.503645	0.503645	0.297875
RHOJ GTPase cycle	1	59	0.00413426	0.509616	0.509616	0.292757
The phototransduction cascade	1	59	0.00413426	0.509616	0.509616	0.292757
ROS sensing by NFE2L2	1	60	0.00420433	0.515515	0.515515	0.287758
Hh mutants are degraded by ERAD	1	61	0.0042744	0.521344	0.521344	0.282876
NIK-->noncanonical NF-kB signaling	1	61	0.0042744	0.521344	0.521344	0.282876
Degradation of GLI2 by the proteasome	1	62	0.00434447	0.527103	0.527103	0.278105
GLI3 is processed to GLI3R by the proteasome	1	62	0.00434447	0.527103	0.527103	0.278105
Degradation of GLI1 by the proteasome	1	62	0.00434447	0.527103	0.527103	0.278105
SUMOylation of chromatin organization proteins	1	62	0.00434447	0.527103	0.527103	0.278105
Signaling by FGFR1	1	62	0.00434447	0.527103	0.527103	0.278105
Antigen processing: Ubiquitination & Proteasome degradation	4	315	0.0220727	0.527622	0.527622	0.277677
RHOQ GTPase cycle	1	63	0.00441455	0.532793	0.532793	0.273441
Autodegradation of Cdh1 by Cdh1:APC/C	1	64	0.00448462	0.538415	0.538415	0.268883
Hh mutants abrogate ligand secretion	1	64	0.00448462	0.538415	0.538415	0.268883
Ion homeostasis	1	64	0.00448462	0.538415	0.538415	0.268883
Intrinsic Pathway for Apoptosis	1	64	0.00448462	0.538415	0.538415	0.268883
Neuronal System	6	489	0.0342653	0.539636	0.539636	0.267899
Vesicle-mediated transport	10	827	0.0579497	0.541616	0.541616	0.266308
RAF/MAP kinase cascade	4	322	0.0225632	0.54494	0.54494	0.263651
Defective CFTR causes cystic fibrosis	1	66	0.00462476	0.549458	0.549458	0.260065
Dectin-1 mediated noncanonical NF-kB signaling	1	66	0.00462476	0.549458	0.549458	0.260065
Asymmetric localization of PCP proteins	1	66	0.00462476	0.549458	0.549458	0.260065
Peroxisomal protein import	1	67	0.00469484	0.554881	0.554881	0.2558
PLC beta mediated events	1	67	0.00469484	0.554881	0.554881	0.2558
Assembly of collagen fibrils and other multimeric structures	1	67	0.00469484	0.554881	0.554881	0.2558
Neddylation	3	241	0.0168874	0.556888	0.556888	0.254232
RAB geranylgeranylation	1	68	0.00476491	0.560239	0.560239	0.251627
APC/C:Cdc20 mediated degradation of Securin	1	68	0.00476491	0.560239	0.560239	0.251627
Signaling by NOTCH1 in Cancer	1	68	0.00476491	0.560239	0.560239	0.251627
Constitutive Signaling by NOTCH1 PEST Domain Mutants	1	68	0.00476491	0.560239	0.560239	0.251627
Signaling by NOTCH1 PEST Domain Mutants in Cancer	1	68	0.00476491	0.560239	0.560239	0.251627
Signaling by NOTCH1 HD+PEST Domain Mutants in Cancer	1	68	0.00476491	0.560239	0.560239	0.251627
Constitutive Signaling by NOTCH1 HD+PEST Domain Mutants	1	68	0.00476491	0.560239	0.560239	0.251627
Metabolism of cofactors	1	68	0.00476491	0.560239	0.560239	0.251627
MAPK1/MAPK3 signaling	4	329	0.0230537	0.561931	0.561931	0.250317
Mitochondrial protein import	1	69	0.00483498	0.565532	0.565532	0.247543
Collagen degradation	1	69	0.00483498	0.565532	0.565532	0.247543
rRNA processing	3	245	0.0171677	0.56804	0.56804	0.245621
Cytoprotection by HMOX1	2	158	0.0110714	0.568894	0.568894	0.244969
Regulation of PTEN gene transcription	1	70	0.00490505	0.570762	0.570762	0.243545
Death Receptor Signalling	2	159	0.0111415	0.572322	0.572322	0.242359
Regulation of RAS by GAPs	1	71	0.00497512	0.57593	0.57593	0.23963
Ion transport by P-type ATPases	1	71	0.00497512	0.57593	0.57593	0.23963
Semaphorin interactions	1	71	0.00497512	0.57593	0.57593	0.23963
Oxygen-dependent proline hydroxylation of Hypoxia-inducible Factor Alpha	1	72	0.0050452	0.581036	0.581036	0.235797
Hedgehog ligand biogenesis	1	72	0.0050452	0.581036	0.581036	0.235797
Glyoxylate metabolism and glycine degradation	1	72	0.0050452	0.581036	0.581036	0.235797
Translation	4	339	0.0237545	0.585601	0.585601	0.232398
Cdc20:Phospho-APC/C mediated degradation of Cyclin A	1	73	0.00511527	0.586081	0.586081	0.232043
G-protein mediated events	1	73	0.00511527	0.586081	0.586081	0.232043
Signaling by BRAF and RAF1 fusions	1	73	0.00511527	0.586081	0.586081	0.232043
Translation of Structural Proteins	1	73	0.00511527	0.586081	0.586081	0.232043
APC:Cdc20 mediated degradation of cell cycle proteins prior to satisfation of the cell cycle checkpoint	1	74	0.00518534	0.591065	0.591065	0.228365
APC/C:Cdh1 mediated degradation of Cdc20 and other APC/C:Cdh1 targeted proteins in late mitosis/early G1	1	74	0.00518534	0.591065	0.591065	0.228365
Regulation of PTEN stability and activity	1	74	0.00518534	0.591065	0.591065	0.228365
Transport of inorganic cations/anions and amino acids/oligopeptides	2	165	0.0115619	0.592478	0.592478	0.227328
Beta-catenin independent WNT signaling	2	166	0.011632	0.595768	0.595768	0.224923
CDK-mediated phosphorylation and removal of Cdc6	1	75	0.00525541	0.59599	0.59599	0.224761
RHOB GTPase cycle	1	75	0.00525541	0.59599	0.59599	0.224761
Regulation of HMOX1 expression and activity	1	75	0.00525541	0.59599	0.59599	0.224761
Chromatin organization	3	256	0.0179385	0.597811	0.597811	0.223436
Chromatin modifying enzymes	3	256	0.0179385	0.597811	0.597811	0.223436
Interleukin-1 family signaling	2	167	0.0117021	0.599038	0.599038	0.222546
APC/C:Cdc20 mediated degradation of mitotic proteins	1	76	0.00532549	0.600855	0.600855	0.22123
Activation of APC/C and APC/C:Cdc20 mediated degradation of mitotic proteins	1	77	0.00539556	0.605663	0.605663	0.217769
Regulated Necrosis	1	77	0.00539556	0.605663	0.605663	0.217769
Protein localization	2	170	0.0119123	0.60873	0.60873	0.215575
RHOG GTPase cycle	1	78	0.00546563	0.610412	0.610412	0.214377
PTEN Regulation	2	171	0.0119823	0.611922	0.611922	0.213304
RHOC GTPase cycle	1	79	0.0055357	0.615105	0.615105	0.21105
Ca2+ pathway	1	81	0.00567585	0.624323	0.624323	0.20459
Cell death signalling via NRAGE, NRIF and NADE	1	81	0.00567585	0.624323	0.624323	0.20459
Diseases of carbohydrate metabolism	1	81	0.00567585	0.624323	0.624323	0.20459
PPARA activates gene expression	2	175	0.0122626	0.624489	0.624489	0.204475
Cellular response to starvation	2	176	0.0123327	0.627582	0.627582	0.20233
Influenza Viral RNA Transcription and Replication	2	176	0.0123327	0.627582	0.627582	0.20233
Endosomal/Vacuolar pathway	1	82	0.00574592	0.62885	0.62885	0.201453
Regulation of lipid metabolism by PPARalpha	2	177	0.0124028	0.630655	0.630655	0.200208
Regulation of RUNX2 expression and activity	1	83	0.00581599	0.633322	0.633322	0.198376
Regulation of APC/C activators between G1/S and early anaphase	1	83	0.00581599	0.633322	0.633322	0.198376
TP53 Regulates Transcription of Cell Death Genes	1	83	0.00581599	0.633322	0.633322	0.198376
Signaling by NOTCH1	1	84	0.00588606	0.63774	0.63774	0.195356
RHO GTPase cycle	5	460	0.0322332	0.653213	0.653213	0.184945
Signaling by MET	1	88	0.00616635	0.654891	0.654891	0.183831
Inositol phosphate metabolism	1	90	0.0063065	0.663162	0.663162	0.178381
Degradation of beta-catenin by the destruction complex	1	91	0.00637657	0.667223	0.667223	0.175729
Potential therapeutics for SARS	1	91	0.00637657	0.667223	0.667223	0.175729
APC/C-mediated degradation of cell cycle proteins	1	92	0.00644664	0.671235	0.671235	0.173126
Regulation of mitotic cell cycle	1	92	0.00644664	0.671235	0.671235	0.173126
Hedgehog 'on' state	1	92	0.00644664	0.671235	0.671235	0.173126
Signaling by NOTCH4	1	92	0.00644664	0.671235	0.671235	0.173126
RAC2 GTPase cycle	1	92	0.00644664	0.671235	0.671235	0.173126
Adaptive Immune System	11	1005	0.0704225	0.67245	0.67245	0.17234
Apoptosis	2	192	0.0134539	0.674411	0.674411	0.171076
Oncogenic MAPK signaling	1	93	0.00651671	0.675199	0.675199	0.170568
Protein-protein interactions at synapses	1	93	0.00651671	0.675199	0.675199	0.170568
Class I MHC mediated antigen processing & presentation	5	474	0.0332142	0.678917	0.678917	0.168183
Mitochondrial translation termination	1	94	0.00658678	0.679116	0.679116	0.168056
Amplification of signal from the kinetochores	1	94	0.00658678	0.679116	0.679116	0.168056
Amplification of signal from unattached kinetochores via a MAD2 inhibitory signal	1	94	0.00658678	0.679116	0.679116	0.168056
Mitochondrial translation elongation	1	94	0.00658678	0.679116	0.679116	0.168056
RAB GEFs exchange GTP for GDP on RABs	1	94	0.00658678	0.679116	0.679116	0.168056
Antigen processing-Cross presentation	2	195	0.0136641	0.682643	0.682643	0.165806
Constitutive Signaling by Aberrant PI3K in Cancer	1	96	0.00672693	0.686809	0.686809	0.163164
Mitochondrial translation initiation	1	96	0.00672693	0.686809	0.686809	0.163164
Influenza Infection	2	200	0.0140144	0.695987	0.695987	0.157399
Leishmania parasite growth and survival	3	297	0.0208114	0.696585	0.696585	0.157026
Anti-inflammatory response favouring Leishmania parasite infection	3	297	0.0208114	0.696585	0.696585	0.157026
ABC transporter disorders	1	99	0.00693715	0.698006	0.698006	0.156141
PCP/CE pathway	1	99	0.00693715	0.698006	0.698006	0.156141
RAC3 GTPase cycle	1	100	0.00700722	0.701649	0.701649	0.15388
Transcriptional Regulation by MECP2	1	100	0.00700722	0.701649	0.701649	0.15388
Mitochondrial translation	1	102	0.00714736	0.708805	0.708805	0.149474
EPH-Ephrin signaling	1	102	0.00714736	0.708805	0.708805	0.149474
Antigen activates B Cell Receptor (BCR) leading to generation of second messengers	1	103	0.00721743	0.712318	0.712318	0.147326
TNFR2 non-canonical NF-kB pathway	1	104	0.00728751	0.71579	0.71579	0.145215
Collagen formation	1	104	0.00728751	0.71579	0.71579	0.145215
Formation of a pool of free 40S subunits	1	106	0.00742765	0.722608	0.722608	0.141097
Interleukin-4 and Interleukin-13 signaling	2	211	0.0147852	0.72372	0.72372	0.140429
Cellular response to chemical stress	2	212	0.0148553	0.726133	0.726133	0.138984
Transcriptional regulation of white adipocyte differentiation	1	109	0.00763787	0.732532	0.732532	0.135173
Mitotic Spindle Checkpoint	1	111	0.00777801	0.738951	0.738951	0.131384
Opioid Signalling	1	113	0.00791816	0.745217	0.745217	0.127717
Asparagine N-linked glycosylation	4	421	0.0295004	0.749442	0.749442	0.125262
Post-translational modification: synthesis of GPI-anchored proteins	1	115	0.0080583	0.751333	0.751333	0.124167
ABC-family proteins mediated transport	1	122	0.00854881	0.771613	0.771613	0.1126
Cytokine Signaling in Immune system	11	1092	0.0765188	0.772305	0.772305	0.112211
Disease	26	2431	0.170345	0.776818	0.776818	0.10968
FCERI mediated MAPK activation	1	124	0.00868895	0.7771	0.7771	0.109523
Programmed Cell Death	2	238	0.0166772	0.78288	0.78288	0.106305
VEGFA-VEGFR2 Pathway	1	127	0.00889917	0.785084	0.785084	0.105084
Peptide hormone metabolism	1	127	0.00889917	0.785084	0.785084	0.105084
FCERI mediated Ca+2 mobilization	1	129	0.00903931	0.790248	0.790248	0.102236
PI5P, PP2A and IER3 Regulate PI3K/AKT Signaling	1	129	0.00903931	0.790248	0.790248	0.102236
Infection with Mycobacterium tuberculosis	1	135	0.00945974	0.805013	0.805013	0.0941973
Negative regulation of the PI3K/AKT network	1	137	0.00959989	0.809701	0.809701	0.0916755
Cardiac conduction	1	138	0.00966996	0.812003	0.812003	0.0904426
Signaling by VEGF	1	138	0.00966996	0.812003	0.812003	0.0904426
FCGR3A-mediated IL10 synthesis	1	141	0.00988018	0.818743	0.818743	0.0868522
Platelet degranulation	1	141	0.00988018	0.818743	0.818743	0.0868522
Response to elevated platelet cytosolic Ca2+	1	148	0.0103707	0.833552	0.833552	0.0790674
Degradation of the extracellular matrix	1	148	0.0103707	0.833552	0.833552	0.0790674
Axon guidance	5	585	0.0409922	0.837243	0.837243	0.0771484
Host Interactions of HIV factors	1	151	0.0105809	0.839524	0.839524	0.0759669
RHOA GTPase cycle	1	154	0.0107911	0.845283	0.845283	0.0729978
CDC42 GTPase cycle	1	159	0.0111415	0.854429	0.854429	0.0683242
ADORA2B mediated anti-inflammatory cytokines production	1	159	0.0111415	0.854429	0.854429	0.0683242
G alpha (q) signalling events	2	284	0.0199005	0.858438	0.858438	0.066291
Visual phototransduction	1	169	0.0118422	0.871138	0.871138	0.059913
Nervous system development	5	621	0.0435148	0.872444	0.872444	0.0592625
G alpha (s) signalling events	1	172	0.0120524	0.875769	0.875769	0.0576107
ER-Phagosome pathway	1	173	0.0121225	0.877275	0.877275	0.0568643
Selenoamino acid metabolism	1	180	0.012613	0.887323	0.887323	0.0519181
Regulation of expression of SLITs and ROBOs	1	183	0.0128232	0.891375	0.891375	0.0499395
RAC1 GTPase cycle	1	191	0.0133838	0.901486	0.901486	0.0450411
Metabolism of amino acids and derivatives	5	665	0.046598	0.906576	0.906576	0.0425957
Peptide ligand-binding receptors	1	203	0.0142247	0.914924	0.914924	0.0386151
Muscle contraction	1	213	0.0149254	0.924718	0.924718	0.0339907
Hemostasis	6	803	0.056268	0.925585	0.925585	0.0335835
Innate Immune System	11	1334	0.0934763	0.934732	0.934732	0.0293131
Signaling by ROBO receptors	1	235	0.016467	0.942496	0.942496	0.0257206
Transport of small molecules	7	961	0.0673394	0.948243	0.948243	0.0230805
Interferon Signaling	2	394	0.0276084	0.952322	0.952322	0.0212161
Cell surface interactions at the vascular wall	1	257	0.0180085	0.956094	0.956094	0.0194995
Phase II - Conjugation of compounds	1	263	0.018429	0.959212	0.959212	0.0180856
Class A/1 (Rhodopsin-like receptors)	2	412	0.0288697	0.960372	0.960372	0.0175603
SLC-mediated transmembrane transport	2	416	0.02915	0.961976	0.961976	0.0168355
Disorders of transmembrane transporters	1	278	0.0194801	0.966076	0.966076	0.0149887
Platelet activation, signaling and aggregation	1	293	0.0205311	0.971791	0.971791	0.0124271
Metabolism of carbohydrates	2	456	0.0319529	0.974951	0.974951	0.0110174
Immune System	23	2684	0.188074	0.976551	0.976551	0.0103052
Neutrophil degranulation	2	480	0.0336346	0.980566	0.980566	0.00852338
Extracellular matrix organization	1	329	0.0230537	0.981897	0.981897	0.00793416
GPCR downstream signalling	4	786	0.0550767	0.986747	0.986747	0.00579437
Metabolism of vitamins and cofactors	1	379	0.0265574	0.990241	0.990241	0.00425888
Diseases of metabolism	1	409	0.0286595	0.993272	0.993272	0.00293187
Signaling by GPCR	4	865	0.0606124	0.993657	0.993657	0.00276372
G alpha (i) signalling events	1	426	0.0298507	0.994552	0.994552	0.00237247
GPCR ligand binding	2	606	0.0424637	0.99505	0.99505	0.00215503
Sensory Perception	1	493	0.0345456	0.997635	0.997635	0.0010284
Biological oxidations	1	549	0.0384696	0.998826	0.998826	0.000510125
Metabolism of lipids	2	1444	0.101184	1	1	9.50567e-08
Metabolism	10	3646	0.255483	1	1	9.14616e-13
