# Supplementary material for: Decoding the activated stem cell phenotype of the neonatally maturing pituitary
Source: eLife. 2022 Jun 14;11:e75742. doi: 10.7554/eLife.75742 (PMC9333987; doi:10.7554/eLife.75742)
Supplement: Figure 4—figure supplement 2—source data 2. — (A) DEG analysis in SC1+SC2+Prolif SC of control versus damaged neonatal AP The columns represent: gene names (Gene), p values (p_val), average log fold change expression (avg_logFC; positive values indicate upregulation and negative values downregulation in control), percentage of cells expressing the indicated gene in control (pct.1) and in damaged (pct.2), and the FDR adjusted p value (p_val_adj). (B) Gene Ontology (GO) analysis of genes upregulated in neonatal control versus damaged SC1+SC2+Prolif SC. Analyses were performed using Reactome overrepresentation analysis. Pathway name, number of mapped identifiers that match the pathway (#Entities found), total number of identifiers in the pathway (#Entities total), total entities in the pathway/total number of entities for the entire species (Entities ratio), p value, FDR, and −log10(FDR) are shown in the columns. Associated with Figure 4—figure supplement 2B. [file elife-75742-fig4-figsupp2-data2.xlsx]

## Sheet: A
DEGs control versus damage (SC1+SC2+Prolif SC; neonatal)
Gene	p_val	avg_logFC	pct.1	pct.2	p_val_adj
Xist	2.57211e-240	-1.80548	0.009	0.437	5.69954e-236
Tsix	1.92019e-96	-0.315166	0.051	0.288	4.25496e-92
Ddx3y	1.58499e-95	0.346767	0.708	0.37	3.51218e-91
Btg2	2.60919e-83	0.780985	0.944	0.905	5.78171e-79
Gh	1.48013e-78	1.08689	0.273	0.066	3.27982e-74
Sox2	1.55451e-76	0.431791	0.934	0.86	3.44465e-72
Gm47283	1.62285e-71	-0.405254	0.53	0.752	3.59607e-67
Nr4a1	8.01753e-70	0.596994	0.859	0.784	1.7766e-65
Egr1	1.62497e-67	0.834077	0.792	0.684	3.60076e-63
Fos	3.0225e-63	1.04488	0.688	0.521	6.69755e-59
Zfp36l1	3.57859e-62	0.48675	0.894	0.801	7.9298e-58
Hey1	4.11515e-58	0.429914	0.65	0.461	9.11875e-54
Spry1	1.32236e-53	0.42027	0.635	0.45	2.93022e-49
Tsc22d3	1.10098e-52	0.300836	0.636	0.448	2.43967e-48
Junb	1.1047e-49	0.658087	0.865	0.794	2.44791e-45
Runx1	3.11619e-48	-0.276318	0.29	0.488	6.90515e-44
Fosb	2.73911e-45	0.384694	0.808	0.69	6.06958e-41
Hmgcs2	9.23953e-45	0.301358	0.801	0.675	2.04739e-40
Gm42418	4.85858e-40	0.405742	1	0.999	1.07661e-35
Tnfrsf12a	7.69104e-39	-0.2805	0.76	0.864	1.70426e-34
Arc	4.3791e-38	0.38642	0.811	0.718	9.70364e-34
Glul	9.14951e-38	0.255988	0.853	0.749	2.02744e-33
Ier2	2.28854e-36	0.478278	0.796	0.704	5.07117e-32
Dusp1	2.50301e-36	0.607193	0.573	0.434	5.54642e-32
Irs2	7.23655e-30	0.271107	0.898	0.86	1.60355e-25
Klf4	5.53056e-28	0.402333	0.683	0.561	1.22552e-23
Cyr61	3.57835e-27	0.433912	0.859	0.808	7.92927e-23
Fas	1.20402e-26	-0.335811	0.659	0.761	2.66798e-22
Txnip	2.91688e-24	0.268975	0.666	0.541	6.46352e-20
Mt2	4.77254e-24	0.268074	0.894	0.824	1.05755e-19
Edn2	1.45067e-23	0.396002	0.593	0.471	3.21454e-19
Cd74	5.26444e-19	-0.304486	0.219	0.332	1.16655e-14
Jun	6.65839e-19	0.252998	0.974	0.973	1.47543e-14
Zfp36l2	2.06428e-18	0.303377	0.762	0.701	4.57424e-14
Atf3	1.64887e-16	0.447491	0.802	0.764	3.65373e-12
Hes1	1.81462e-15	0.293165	0.868	0.846	4.02101e-11
Mgp	1.52821e-12	-0.322288	0.747	0.779	3.38635e-08
Acta2	1.327e-09	-0.323553	0.451	0.522	2.9405e-05

## Sheet: B
GO analysis of genes upregulated in control versus damaged SC1+SC2+Prolif SC (neonatal)
Pathway name	#Entities found	#Entities total	Entities ratio	Entities pValue	Entities FDR	-log10(FDR)
NGF-stimulated transcription	7	56	0.00392404	4.83453e-10	1.14578e-07	6.9409
Nuclear Events (kinase and transcription factor activation)	7	80	0.00560577	5.5588e-09	6.55938e-07	6.18314
Signaling by NTRK1 (TRKA)	8	143	0.0100203	1.30616e-08	1.03187e-06	5.98638
Signaling by NTRKs	8	166	0.011632	4.08938e-08	2.41273e-06	5.61749
NOTCH4 Intracellular Domain Regulates Transcription	4	26	0.00182188	1.41095e-06	6.63146e-05	4.17839
NOTCH3 Intracellular Domain Regulates Transcription	4	36	0.0025226	5.07108e-06	0.000197772	3.70383
Cytokine Signaling in Immune system	13	1092	0.0765188	1.65429e-05	0.00051979	3.28417
Diseases of signal transduction by growth factor receptors and second messengers	9	498	0.0348959	1.79238e-05	0.00051979	3.28417
NOTCH1 Intracellular Domain Regulates Transcription	4	57	0.00399411	3.04071e-05	0.000790583	3.10205
Signaling by NOTCH3	4	63	0.00441455	4.47721e-05	0.000841301	3.07505
Interleukin-4 and Interleukin-13 signaling	6	211	0.0147852	4.55314e-05	0.000841301	3.07505
Signaling by NOTCH1 HD+PEST Domain Mutants in Cancer	4	68	0.00476491	6.00929e-05	0.000841301	3.07505
Signaling by NOTCH1 PEST Domain Mutants in Cancer	4	68	0.00476491	6.00929e-05	0.000841301	3.07505
Constitutive Signaling by NOTCH1 HD+PEST Domain Mutants	4	68	0.00476491	6.00929e-05	0.000841301	3.07505
Constitutive Signaling by NOTCH1 PEST Domain Mutants	4	68	0.00476491	6.00929e-05	0.000841301	3.07505
Signaling by NOTCH1 in Cancer	4	68	0.00476491	6.00929e-05	0.000841301	3.07505
Nuclear events stimulated by ALK signaling in cancer	3	27	0.00189195	8.46275e-05	0.00110016	2.95855
Signaling by Receptor Tyrosine Kinases	9	618	0.0433046	9.54395e-05	0.00124071	2.90633
Signaling by NOTCH1	4	84	0.00588606	0.000135011	0.00162013	2.79045
Generic Transcription Pathway	14	1555	0.108962	0.000157487	0.00173236	2.76136
Signaling by NOTCH4	4	92	0.00644664	0.000190826	0.00209909	2.67797
Signal Transduction	20	2997	0.210006	0.000242355	0.00242355	2.61555
Transcriptional regulation of pluripotent stem cells	3	45	0.00315325	0.000376936	0.00348564	2.45772
RNA Polymerase II Transcription	14	1694	0.118702	0.000387294	0.00348564	2.45772
Activation of the AP-1 family of transcription factors	2	12	0.000840866	0.000653328	0.00391997	2.40672
Signaling by Interleukins	8	643	0.0450564	0.000701404	0.00420842	2.37588
Gene expression (Transcription)	14	1855	0.129984	0.00097397	0.00576209	2.23942
Signaling by ALK fusions and activated point mutants	3	66	0.00462476	0.00113687	0.00576209	2.23942
Signaling by ALK in cancer	3	66	0.00462476	0.00113687	0.00576209	2.23942
RUNX3 regulates NOTCH signaling	2	16	0.00112115	0.00115242	0.00576209	2.23942
NOTCH2 intracellular domain regulates transcription	2	16	0.00112115	0.00115242	0.00576209	2.23942
Signaling by NOTCH	5	259	0.0181487	0.0011863	0.00593149	2.22684
Regulation of gene expression in late stage (branching morphogenesis) pancreatic bud precursor cells	2	20	0.00140144	0.00178663	0.00893313	2.049
FOXO-mediated transcription of cell cycle genes	2	27	0.00189195	0.00321191	0.0160596	1.79427
TP53 regulates transcription of additional cell cycle genes whose exact role in the p53 pathway remain uncertain	2	28	0.00196202	0.0034475	0.0172375	1.76353
Estrogen-dependent nuclear events downstream of ESR-membrane signaling	2	29	0.00203209	0.00369094	0.0184547	1.73389
Growth hormone receptor signaling	2	29	0.00203209	0.00369094	0.0184547	1.73389
FOXO-mediated transcription	3	110	0.00770794	0.00479088	0.0186815	1.72859
ATF4 activates genes in response to endoplasmic reticulum stress	2	34	0.00238245	0.00502417	0.0186815	1.72859
RUNX2 regulates osteoblast differentiation	2	34	0.00238245	0.00502417	0.0186815	1.72859
MAPK targets/ Nuclear events mediated by MAP kinases	2	35	0.00245253	0.00531369	0.0186815	1.72859
SMAD2/SMAD3:SMAD4 heterotrimer regulates transcription	2	38	0.00266274	0.00622715	0.0186815	1.72859
Signaling by NOTCH2	2	38	0.00266274	0.00622715	0.0186815	1.72859
PERK regulates gene expression	2	42	0.00294303	0.00754813	0.0226444	1.64504
RUNX2 regulates bone development	2	43	0.0030131	0.00789646	0.0236894	1.62545
ESR-mediated signaling	4	257	0.0180085	0.00804825	0.0241448	1.61718
Estrogen-dependent gene expression	3	154	0.0107911	0.0119712	0.0359137	1.44474
Transcriptional activity of SMAD2/SMAD3:SMAD4 heterotrimer	2	57	0.00399411	0.0135031	0.0386646	1.41269
PIP3 activates AKT signaling	4	319	0.022353	0.0166548	0.0386646	1.41269
TP53 Regulates Transcription of Cell Cycle Genes	2	65	0.00455469	0.0172892	0.0386646	1.41269
Regulation of beta-cell development	2	67	0.00469484	0.0182985	0.0386646	1.41269
MAP kinase activation	2	69	0.00483498	0.0193323	0.0386646	1.41269
Regulation of PTEN gene transcription	2	70	0.00490505	0.0198583	0.0397165	1.40103
IRS activation	1	7	0.000490505	0.0213562	0.0427124	1.36945
Interleukin-17 signaling	2	77	0.00539556	0.0237055	0.047411	1.32412
Intracellular signaling by second messengers	4	366	0.0256464	0.0260179	0.0481602	1.31731
Immune System	14	2684	0.188074	0.0271884	0.0481602	1.31731
Erythropoietin activates STAT5	1	9	0.00063065	0.0273756	0.0481602	1.31731
Signaling by TGF-beta Receptor Complex	2	87	0.00609628	0.0296841	0.0481602	1.31731
SOS-mediated signalling	1	10	0.000700722	0.0303718	0.0481602	1.31731
POU5F1 (OCT4), SOX2, NANOG repress genes related to differentiation	1	10	0.000700722	0.0303718	0.0481602	1.31731
Neurotransmitter uptake and metabolism In glial cells	1	10	0.000700722	0.0303718	0.0481602	1.31731
Astrocytic Glutamate-Glutamine Uptake And Metabolism	1	10	0.000700722	0.0303718	0.0481602	1.31731
TP53 Regulates Transcription of DNA Repair Genes	2	89	0.00623642	0.0309451	0.0481602	1.31731
Signaling by Nuclear Receptors	4	387	0.0271179	0.0310538	0.0481602	1.31731
Senescence-Associated Secretory Phenotype (SASP)	2	91	0.00637657	0.0322271	0.0481602	1.31731
Interferon Signaling	4	394	0.0276084	0.0328526	0.0481602	1.31731
MyD88 cascade initiated on plasma membrane	2	94	0.00658678	0.0341888	0.0481602	1.31731
Toll Like Receptor 10 (TLR10) Cascade	2	94	0.00658678	0.0341888	0.0481602	1.31731
Toll Like Receptor 5 (TLR5) Cascade	2	94	0.00658678	0.0341888	0.0481602	1.31731
AKT phosphorylates targets in the nucleus	1	12	0.000840866	0.036337	0.0481602	1.31731
TRAF6 mediated induction of NFkB and MAP kinases upon TLR7/8 or 9 activation	2	101	0.00707729	0.0389424	0.0481602	1.31731
Erythropoietin activates Phospholipase C gamma (PLCG)	1	13	0.000910938	0.0393062	0.0481602	1.31731
PI3K/AKT activation	1	13	0.000910938	0.0393062	0.0481602	1.31731
Signal attenuation	1	13	0.000910938	0.0393062	0.0481602	1.31731
Signaling by Leptin	1	13	0.000910938	0.0393062	0.0481602	1.31731
Toll Like Receptor 3 (TLR3) Cascade	2	102	0.00714736	0.0396411	0.0481602	1.31731
MyD88 dependent cascade initiated on endosome	2	102	0.00714736	0.0396411	0.0481602	1.31731
Toll Like Receptor 7/8 (TLR7/8) Cascade	2	103	0.00721743	0.0403446	0.0481602	1.31731
Toll Like Receptor 9 (TLR9) Cascade	2	106	0.00742765	0.0424835	0.0481602	1.31731
TRIF(TICAM1)-mediated TLR4 signaling	2	107	0.00749772	0.0432058	0.0481602	1.31731
MyD88-independent TLR4 cascade	2	107	0.00749772	0.0432058	0.0481602	1.31731
Extra-nuclear estrogen signaling	2	111	0.00777801	0.046141	0.0481602	1.31731
Erythropoietin activates Phosphoinositide-3-kinase (PI3K)	1	16	0.00112115	0.0481602	0.0481602	1.31731
Metallothioneins bind metals	1	16	0.00112115	0.0481602	0.0481602	1.31731
Regulation of FOXO transcriptional activity by acetylation	1	16	0.00112115	0.0481602	0.0481602	1.31731
Oxidative Stress Induced Senescence	2	114	0.00798823	0.0483896	0.0483896	1.31525
Response of EIF2AK4 (GCN2) to amino acid deficiency	2	115	0.0080583	0.049148	0.049148	1.30849
Signaling by TGFB family members	2	116	0.00812837	0.0499107	0.0499107	1.30181
Transcriptional regulation by RUNX3	2	118	0.00826852	0.0514491	0.0514491	1.28862
MyD88:MAL(TIRAP) cascade initiated on plasma membrane	2	118	0.00826852	0.0514491	0.0514491	1.28862
Toll Like Receptor TLR6:TLR2 Cascade	2	118	0.00826852	0.0514491	0.0514491	1.28862
Toll Like Receptor TLR1:TLR2 Cascade	2	121	0.00847873	0.0537885	0.0537885	1.26931
Toll Like Receptor 2 (TLR2) Cascade	2	121	0.00847873	0.0537885	0.0537885	1.26931
Prolactin receptor signaling	1	18	0.0012613	0.0540184	0.0540184	1.26746
FCERI mediated MAPK activation	2	124	0.00868895	0.0561654	0.0561654	1.25053
PI3K/AKT Signaling in Cancer	2	124	0.00868895	0.0561654	0.0561654	1.25053
Erythropoietin activates RAS	1	19	0.00133137	0.0569343	0.0569343	1.24463
Butyrate Response Factor 1 (BRF1) binds and destabilizes mRNA	1	19	0.00133137	0.0569343	0.0569343	1.24463
Killing mechanisms	1	20	0.00140144	0.0598415	0.0598415	1.223
WNT5:FZD7-mediated leishmania damping	1	20	0.00140144	0.0598415	0.0598415	1.223
Disease	12	2431	0.170345	0.0601572	0.0601572	1.22071
Transcriptional Regulation by TP53	4	487	0.0341251	0.0625417	0.0625417	1.20383
POU5F1 (OCT4), SOX2, NANOG activate genes related to proliferation	1	21	0.00147152	0.0627398	0.0627398	1.20246
Response to metal ions	1	21	0.00147152	0.0627398	0.0627398	1.20246
The NLRP3 inflammasome	1	24	0.00168173	0.0713826	0.0713826	1.14641
Synthesis of Ketone Bodies	1	25	0.0017518	0.0742462	0.0742462	1.12933
Transcriptional regulation by RUNX2	2	147	0.0103006	0.0755442	0.0755442	1.1218
Cellular responses to stimuli	6	970	0.06797	0.075848	0.075848	1.12006
Synthesis, secretion, and deacylation of Ghrelin	1	26	0.00182188	0.0771012	0.0771012	1.11294
Toll Like Receptor 4 (TLR4) Cascade	2	151	0.0105809	0.0791071	0.0791071	1.10178
Unfolded Protein Response (UPR)	2	155	0.0108612	0.0827224	0.0827224	1.08238
RAF-independent MAPK1/3 activation	1	28	0.00196202	0.0827853	0.0827853	1.08205
Response of EIF2AK1 (HRI) to heme deficiency	1	29	0.00203209	0.0856145	0.0856145	1.06745
Ketone body metabolism	1	29	0.00203209	0.0856145	0.0856145	1.06745
Constitutive Signaling by AKT1 E17K in Cancer	1	29	0.00203209	0.0856145	0.0856145	1.06745
Neurodegenerative Diseases	1	30	0.00210217	0.0884352	0.0884352	1.05337
Deregulated CDK5 triggers multiple neurodegenerative pathways in Alzheimer's disease models	1	30	0.00210217	0.0884352	0.0884352	1.05337
Developmental Biology	7	1263	0.0885012	0.0902006	0.0902006	1.04479
Acyl chain remodelling of PS	1	31	0.00217224	0.0912474	0.0912474	1.03978
Interleukin-7 signaling	1	31	0.00217224	0.0912474	0.0912474	1.03978
Defective Intrinsic Pathway for Apoptosis	1	33	0.00231238	0.0968464	0.0968464	1.01392
PTEN Regulation	2	171	0.0119823	0.0976729	0.0976729	1.01023
Inflammasomes	1	34	0.00238245	0.0996332	0.0996332	1.0016
PPARA activates gene expression	2	175	0.0122626	0.101524	0.101524	0.993429
Signaling by Erythropoietin	1	35	0.00245253	0.102412	0.102412	0.989651
Cellular response to starvation	2	176	0.0123327	0.102494	0.102494	0.989301
Regulation of lipid metabolism by PPARalpha	2	177	0.0124028	0.103466	0.103466	0.985201
EGFR downregulation	1	37	0.00259267	0.107943	0.107943	0.966804
MAPK family signaling cascades	3	380	0.0266274	0.112005	0.112005	0.950764
Interferon alpha/beta signaling	2	186	0.0130334	0.11233	0.11233	0.949504
Toll-like Receptor Cascades	2	188	0.0131736	0.114327	0.114327	0.941852
Glutamate and glutamine metabolism	1	42	0.00294303	0.121627	0.121627	0.914969
RET signaling	1	43	0.0030131	0.124339	0.124339	0.905391
Cellular Senescence	2	200	0.0140144	0.126496	0.126496	0.897922
Deactivation of the beta-catenin transactivating complex	1	44	0.00308318	0.127043	0.127043	0.896048
Negative regulation of MAPK pathway	1	49	0.00343354	0.140441	0.140441	0.852507
Cell recruitment (pro-inflammatory response)	1	54	0.0037839	0.153637	0.153637	0.813503
Purinergic signaling in leishmaniasis infection	1	54	0.0037839	0.153637	0.153637	0.813503
Fc epsilon receptor (FCERI) signaling	2	235	0.016467	0.163563	0.163563	0.786314
PI3K Cascade	1	58	0.00406419	0.164052	0.164052	0.785019
Cellular responses to stress	5	952	0.0667087	0.167762	0.167762	0.775307
Signaling by EGFR	1	61	0.0042744	0.17178	0.17178	0.765027
Interferon gamma signaling	2	250	0.017518	0.180012	0.180012	0.744698
IRS-mediated signalling	1	65	0.00455469	0.181976	0.181976	0.739985
IRS-related events triggered by IGF1R	1	69	0.00483498	0.19205	0.19205	0.716586
Nucleotide-binding domain, leucine rich repeat containing receptor (NLR) signaling pathways	1	71	0.00497512	0.197041	0.197041	0.705443
Insulin receptor signalling cascade	1	72	0.0050452	0.199525	0.199525	0.700002
IGF1R signaling cascade	1	72	0.0050452	0.199525	0.199525	0.700002
Signaling by Type 1 Insulin-like Growth Factor 1 Receptor (IGF1R)	1	73	0.00511527	0.202002	0.202002	0.694644
Nuclear Receptor transcription pathway	1	86	0.00602621	0.233527	0.233527	0.631664
Pre-NOTCH Transcription and Translation	1	89	0.00623642	0.240627	0.240627	0.618656
Diseases of programmed cell death	1	90	0.0063065	0.242979	0.242979	0.614431
Regulation of mRNA stability by proteins that bind AU-rich elements	1	93	0.00651671	0.249994	0.249994	0.602071
Constitutive Signaling by Aberrant PI3K in Cancer	1	96	0.00672693	0.256945	0.256945	0.59016
Signaling by Insulin receptor	1	97	0.006797	0.259248	0.259248	0.586285
RAF/MAP kinase cascade	2	322	0.0225632	0.261539	0.261539	0.582463
Transcriptional Regulation by MECP2	1	100	0.00700722	0.266115	0.266115	0.574931
MAPK1/MAPK3 signaling	2	329	0.0230537	0.269571	0.269571	0.569327
MAPK6/MAPK4 signaling	1	106	0.00742765	0.279663	0.279663	0.553365
Post-translational protein phosphorylation	1	109	0.00763787	0.286345	0.286345	0.54311
Transcriptional regulation of white adipocyte differentiation	1	109	0.00763787	0.286345	0.286345	0.54311
Pre-NOTCH Expression and Processing	1	114	0.00798823	0.297348	0.297348	0.526735
Activation of HOX genes during differentiation	1	116	0.00812837	0.301702	0.301702	0.520421
Activation of anterior HOX genes in hindbrain development during early embryogenesis	1	116	0.00812837	0.301702	0.301702	0.520421
Stimuli-sensing channels	1	119	0.00833859	0.308185	0.308185	0.511189
Regulation of Insulin-like Growth Factor (IGF) transport and uptake by Insulin-like Growth Factor Binding Proteins (IGFBPs)	1	127	0.00889917	0.325185	0.325185	0.48787
Peptide hormone metabolism	1	127	0.00889917	0.325185	0.325185	0.48787
PI5P, PP2A and IER3 Regulate PI3K/AKT Signaling	1	129	0.00903931	0.32937	0.32937	0.482316
Negative regulation of the PI3K/AKT network	1	137	0.00959989	0.345861	0.345861	0.461098
Leishmania infection	2	406	0.0284493	0.357287	0.357287	0.446983
Cytoprotection by HMOX1	1	158	0.0110714	0.387287	0.387287	0.411967
HCMV Late Events	1	175	0.0122626	0.418934	0.418934	0.377854
Peptide ligand-binding receptors	1	203	0.0142247	0.46761	0.46761	0.330116
Ion channel transport	1	206	0.0144349	0.472582	0.472582	0.325522
Cellular response to chemical stress	1	212	0.0148553	0.482392	0.482392	0.3166
HCMV Early Events	1	215	0.0150655	0.487229	0.487229	0.312266
TCF dependent signaling in response to WNT	1	216	0.0151356	0.488832	0.488832	0.31084
Glycerophospholipid biosynthesis	1	222	0.015556	0.498346	0.498346	0.302469
HCMV Infection	1	270	0.0189195	0.568476	0.568476	0.245288
G alpha (q) signalling events	1	284	0.0199005	0.58706	0.58706	0.231318
Phospholipid metabolism	1	315	0.0220727	0.625468	0.625468	0.203795
Signaling by WNT	1	332	0.023264	0.645025	0.645025	0.190423
Transmission across Chemical Synapses	1	343	0.0240348	0.657144	0.657144	0.182339
Class A/1 (Rhodopsin-like receptors)	1	412	0.0288697	0.724444	0.724444	0.139995
Neuronal System	1	489	0.0342653	0.784352	0.784352	0.105489
Innate Immune System	3	1334	0.0934763	0.792181	0.792181	0.101176
Infectious disease	3	1357	0.0950879	0.801998	0.801998	0.0958267
Metabolism of lipids	3	1444	0.101184	0.835796	0.835796	0.0778996
Axon guidance	1	585	0.0409922	0.841447	0.841447	0.0749731
GPCR ligand binding	1	606	0.0424637	0.851806	0.851806	0.0696592
Nervous system development	1	621	0.0435148	0.858797	0.858797	0.0661093
Metabolism of amino acids and derivatives	1	665	0.046598	0.877497	0.877497	0.0567544
Metabolism of RNA	1	783	0.0548665	0.916498	0.916498	0.0378686
GPCR downstream signalling	1	786	0.0550767	0.917311	0.917311	0.0374834
Signaling by GPCR	1	865	0.0606124	0.936148	0.936148	0.0286553
Transport of small molecules	1	961	0.0673394	0.953458	0.953458	0.0206982
Metabolism of proteins	2	2205	0.154509	0.99439	0.99439	0.00244345
Post-translational protein modification	1	1598	0.111975	0.994621	0.994621	0.00234237
Metabolism	4	3646	0.255483	0.998473	0.998473	0.000663562
